# Supplementary material for: [1,5]-Hydride Shift Triggered N-Dealkylative Cyclization into 2-Oxo-1,2,3,4-tetrahydroquinoline-3-carboxylates via Boronate Complexes
Source: MDPI journal article supplement (doi:10.3390/molecules27165270), 2022-08-18

## Contents

|                                                                                        |            |
|----------------------------------------------------------------------------------------|------------|
| <b>1. General</b>                                                                      | <b>S2</b>  |
| <b>2. Synthesis of starting aldehydes</b>                                              | <b>S3</b>  |
| <b>3. Synthesis of benzylmalonates 1a-p</b>                                            | <b>S6</b>  |
| <b>4. NMR study on the reaction intermediates</b>                                      | <b>S12</b> |
| <b>5. References</b>                                                                   | <b>S16</b> |
| <b>6. Copies of <math>^1\text{H}</math> and <math>^{13}\text{C}</math> NMR spectra</b> | <b>S17</b> |

## 1. General

Commercially available reagents were used without additional purification. E. Merck Kieselgel 60 was used for column chromatography.

Thin-layer chromatography (TLC) was performed on silica gel 60 F254 glass-backed plates (MERCK). Visualization was performed using UV light (254 or 312 nm) or staining with  $\text{KMnO}_4$ .

NMR spectra (except NMR study from Part 4) were recorded on a 700 MHz Bruker Avance III NMR at 303K, Bruker Avance III 800 (with a 5-mm CPTXI cryoprobe) and Bruker Fourier 300. Chemical shifts were reported relative to residue peaks of  $\text{DMSO-d}_6$  (2.51 ppm for  $^1\text{H}$  and 39.5 ppm for  $^{13}\text{C}$ ).

Melting points were measured on a SMP 30 apparatus without correction.

High-resolution mass spectra (HRMS) spectra were recorded on AB Sciex TripleTOF® 5600+ System using electrospray ionization (ESI). The measurements were done in a positive ion mode (interface capillary voltage – 5500 V); mass range from  $m/z$  50 to  $m/z$  3000; external or internal calibration was done with ESI Tuning Mix, Agilent. A syringe injection was used for solutions in acetonitrile, methanol, or water (flow rate 20  $\mu\text{l}/\text{min}$ ). Nitrogen was applied as a dry gas; interface temperature was set at 180 °C. IUPAC compound names were generated using ChemDraw Software.

## 2. Synthesis of starting aldehydes

### General method

Mixture of the corresponding 2-fluorobenzaldehyde (10 mmol), benzylamine (13 mmol) and  $K_2CO_3$  (2.07 g, 15 mmol) in of freshly distilled DMF (50 mL) was heated at 100°C for 12 h. EtOAc (200 mL) was added and the resulted mixture was washed with brine (3×30 mL). Organic layer was dried over anhydrous  $Na_2SO_4$ , all volatiles were removed in vacuo and the residue was purified by flash chromatography (eluent – mixture of hexane and EtOAc, v/v 10:1).

2-(Benzyl(methyl)amino)benzaldehyde, 2-(benzyl(methyl)amino)-5-methylbenzaldehyde,<sup>[1]</sup> 2-(benzyl(ethyl)amino)benzaldehyde,<sup>[2]</sup> 2-(benzyl(methyl)amino)-5-methoxybenzaldehyde,<sup>[3]</sup> 2-(diethylamino)benzaldehyde<sup>[4]</sup> and 2-(benzyl(methyl)amino)-5-nitrobenzaldehyde<sup>[5]</sup> were synthesized by the same method, the spectral properties corresponded to the literature data.

### 2-(Benzyl(methyl)amino)-3-chlorobenzaldehyde

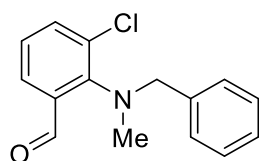

Yield 1.35 g (52%), yellow viscous oil.

$^1H$  NMR (700 MHz, DMSO- $d_6$ )  $\delta$  ppm: 2.88 (s, 3H), 4.35 (s, 2H), 7.21 - 7.25 (m, 1H), 7.27 - 7.33 (m, 5H), 7.62 (dd,  $J=7.7$ , 1.6 Hz, 1H), 7.75 (dd,  $J=7.8$ , 1.7 Hz, 1H), 10.27 (d,  $J=0.6$  Hz, 1H).

$^{13}C$  NMR (75 MHz, DMSO- $d_6$ )  $\delta$  ppm: 41.3, 59.3, 126.7, 127.2, 127.3, 128.3, 128.6, 133.9, 135.8, 136.3, 138.3, 150.6, 191.6.

HRMS (ESI-TOF) found,  $m/z$ : 260.0836  $[M+H]^+$ .  $C_{15}H_{15}ClNO^+$ . Calculated,  $m/z$ : 260.0837.

### 2-(Benzyl(methyl)amino)-5-chlorobenzaldehyde

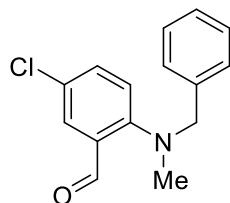

Yield 2.43 g (94%), yellow viscous oil.

$^1H$  NMR (700 MHz, DMSO- $d_6$ )  $\delta$  ppm: 2.81 (s, 3H), 4.38 (s, 2H), 7.20 (d,  $J=9.0$  Hz, 1H), 7.25 - 7.28 (m, 3H), 7.33 (t,  $J=7.5$  Hz, 2H), 7.54 (dd,  $J=8.9$ , 2.8 Hz, 1H), 7.64 (d,  $J=2.7$  Hz, 1H), 10.17 (s, 1H).

$^{13}C$  NMR (75 MHz, DMSO- $d_6$ )  $\delta$  ppm: 42.5, 60.7, 121.7, 125.0, 127.3, 127.7, 128.0, 128.5, 129.0, 134.1, 137.3, 153.3, 189.5.

HRMS (ESI-TOF) found,  $m/z$ : 260.0838  $[M+H]^+$ .  $C_{15}H_{15}ClNO^+$ . Calculated,  $m/z$ : 260.0837.

### 2-(Benzyl(methyl)amino)-4-bromobenzaldehyde

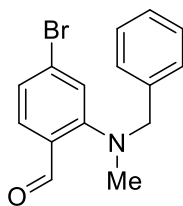

Yield 2.45 g (81%), yellow viscous oil.

$^1\text{H}$  NMR (700 MHz, DMSO- $d_6$ )  $\delta$  ppm: 2.81 (s, 3H), 4.41 (s, 2H), 7.22 (dd,  $J=8.3$ , 1.1 Hz, 1H), 7.25 - 7.29 (m, 3H), 7.32 (d,  $J=1.3$  Hz, 1H), 7.35 (t,  $J=7.6$  Hz, 2H), 7.61 (d,  $J=8.2$  Hz, 1H), 10.13 (s, 1H).

$^{13}\text{C}$  NMR (176 MHz, DMSO- $d_6$ )  $\delta$  ppm: 42.2, 60.4, 122.0, 123.5, 125.7, 127.2, 127.6, 128.4, 128.6, 132.1, 137.2, 155.2, 189.7.

HRMS (ESI-TOF) found,  $m/z$ : 304.0337  $[\text{M}+\text{H}]^+$ .  $\text{C}_{15}\text{H}_{15}\text{BrNO}^+$ . Calculated,  $m/z$ : 304.0332.

### 2-(Benzyl(methyl)amino)-4-(trifluoromethyl)benzaldehyde

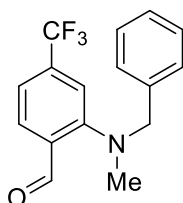

Yield 2.20 g (75%), yellow viscous oil.

$^1\text{H}$  NMR (700 MHz, DMSO- $d_6$ )  $\delta$  ppm: 2.81 (s, 3H), 4.41 (s, 2H), 7.22 (dd,  $J=8.3$ , 1.1 Hz, 1H), 7.25 - 7.29 (m, 3H), 7.32 (d,  $J=1.3$  Hz, 1H), 7.35 (t,  $J=7.6$  Hz, 2H), 7.61 (d,  $J=8.2$  Hz, 1H), 10.13 (s, 1H).

$^{13}\text{C}$  NMR (201 MHz, DMSO- $d_6$ )  $\delta$  ppm: 42.4, 60.2, 115.7 (q,  $J=4.4$  Hz), 116.4 (q,  $J=4.4$  Hz), 123.6 (q,  $J=272.9$  Hz), 127.3, 127.6, 128.5, 129.1, 131.4, 133.7 (q,  $J=32.3$  Hz), 137.2, 154.2, 190.1.

HRMS (ESI-TOF) found,  $m/z$ : 294.1102  $[\text{M}+\text{H}]^+$ .  $\text{C}_{16}\text{H}_{15}\text{F}_3\text{NO}^+$ . Calculated,  $m/z$ : 294.1100.

### 2-(Benzyl(ethyl)amino)-5-bromobenzaldehyde

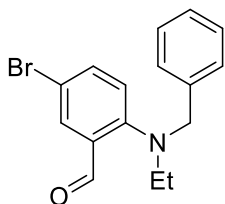

Yield 2.95 g (93%), yellow viscous oil.

$^1\text{H}$  NMR (700 MHz, DMSO- $d_6$ )  $\delta$  ppm: 1.04 (t,  $J=7.1$  Hz, 3H), 3.18 (q,  $J=7.1$  Hz, 2H), 4.36 (s, 2H), 7.20 - 7.24 (m, 2H), 7.26 - 7.30 (m, 4H), 7.66 (dd,  $J=8.8$ , 2.5 Hz, 1H), 7.72 (d,  $J=2.5$  Hz, 1H), 10.21 (s, 1H).

$^{13}\text{C}$  NMR (75 MHz, DMSO- $d_6$ )  $\delta$  ppm: 11.8, 50.3, 56.3, 114.1, 124.5, 127.1, 128.1, 128.4, 130.7, 131.0, 136.7, 137.8, 152.7, 189.7.

HRMS (ESI-TOF) found,  $m/z$ : 318.0486  $[\text{M}+\text{H}]^+$ .  $\text{C}_{16}\text{H}_{17}\text{BrNO}^+$ . Calculated,  $m/z$ : 318.0488.

**2-(Benzyl(ethyl)amino)-4-methoxybenzaldehyde**

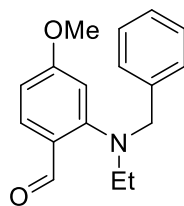

Yield 2.37 g (88%), yellow viscous oil.

$^1\text{H}$  NMR (700 MHz, DMSO- $d_6$ )  $\delta$  ppm: 1.04 (t,  $J=7.1$  Hz, 3H), 3.18 (q,  $J=7.1$  Hz, 2H), 3.79 (s, 3H), 4.35 (s, 2H), 6.67 (dd,  $J=8.6, 2.1$  Hz, 1H), 6.70 (d,  $J=2.3$  Hz, 1H), 7.21 (t,  $J=7.1$  Hz, 1H), 7.27 - 7.32 (m, 4H), 7.65 (d,  $J=8.6$  Hz, 1H), 10.15 (s, 1H).

$^{13}\text{C}$  NMR (75 MHz, DMSO- $d_6$ )  $\delta$  ppm: 11.7, 50.4, 55.5, 56.0, 106.9, 108.4, 123.0, 127.0, 128.1, 128.3, 131.3, 138.3, 155.8, 164.3, 189.1.

HRMS (ESI-TOF) found,  $m/z$ : 270.1491  $[\text{M}+\text{H}]^+$ .  $\text{C}_{17}\text{H}_{20}\text{NO}_2^+$ . Calculated,  $m/z$ : 270.1489.

### 3. Synthesis of benzylmalonates 1a-p

#### General method

5 Mmol of corresponding aldehyde and 5 mmol of dimethyl or diethyl malonate were dissolved in 40 mL of toluene, 20 mg of benzoic acid and 20 mg of piperidine were added and the resulted mixture was refluxed in argon for 24 h. All volatiles were removed in vacuo and the residue was purified by flash chromatography (eluent – mixture of hexane and EtOAc, v/v 8:1).

Dimethyl 2-(2-(benzyl(methyl)amino)benzylidene)malonate (**1a**)<sup>[2]</sup> and dimethyl 2-(2-(benzyl(ethyl)amino)benzylidene)malonate (**1o**)<sup>[6]</sup> were synthesized by the same method, the spectral properties corresponded to the literature data.

#### Diethyl 2-(2-(benzyl(methyl)amino)benzylidene)malonate (**1b**)

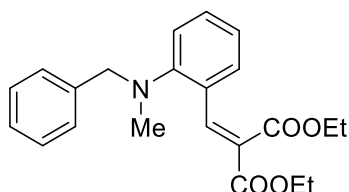

Yield 1.27 g (69%), yellow viscous oil.

<sup>1</sup>H NMR (700 MHz, DMSO-*d*<sub>6</sub>) δ ppm: 1.13 (t, *J*=7.1 Hz, 3H), 1.23 (t, *J*=7.1 Hz, 3H), 2.62 (s, 3H), 4.08 (s, 2H), 4.20 (qd, *J*=7.1, 5.3 Hz, 4H), 7.05 (t, *J*=7.4 Hz, 1H), 7.12 (d, *J*=7.8 Hz, 1H), 7.22 - 7.29 (m, 4H), 7.32 (t, *J*=7.4 Hz, 2H), 7.36 - 7.40 (m, 1H), 8.04 (s, 1H).

<sup>13</sup>C NMR (75 MHz, DMSO-*d*<sub>6</sub>) δ ppm: 13.7, 14.0, 40.4, 61.0, 61.2, 61.3, 119.7, 122.3, 125.4, 126.7, 127.3, 128.2, 128.3, 128.6, 131.3, 137.5, 141.0, 152.4, 163.6, 165.7.

HRMS (ESI-TOF) found, *m/z*: 368.1865 [M+H]<sup>+</sup>. C<sub>22</sub>H<sub>26</sub>NO<sub>4</sub><sup>+</sup>. Calculated, *m/z*: 368.1856.

#### Dimethyl 2-(2-(benzyl(methyl)amino)-5-methylbenzylidene)malonate (**1c**)

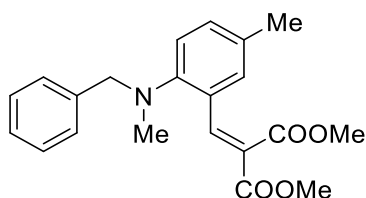

Yield 1.32 g (75%), yellow viscous oil.

<sup>1</sup>H NMR (700 MHz, DMSO-*d*<sub>6</sub>) δ ppm: 2.24 (s, 3H), 2.59 (s, 3H), 3.72 (s, 3H), 3.75 (s, 3H), 4.03 (s, 2H), 7.02 (s, 1H), 7.04 (d, *J*=8.2 Hz, 1H), 7.21 (dd, *J*=8.3, 1.4 Hz, 1H), 7.23 - 7.28 (m, 3H), 7.32 (t, *J*=7.4 Hz, 2H), 8.08 (s, 1H).

<sup>13</sup>C NMR (75 MHz, DMSO-*d*<sub>6</sub>) δ ppm: 20.3, 41.0, 52.5, 52.6, 61.1, 120.0, 124.5, 126.6, 127.2, 128.3, 128.5, 131.5, 132.1, 137.6, 141.2, 150.3, 164.1, 166.3.

HRMS (ESI-TOF) found, *m/z*: 354.1701 [M+H]<sup>+</sup>. C<sub>21</sub>H<sub>24</sub>NO<sub>4</sub><sup>+</sup>. Calculated, *m/z*: 354.1700.

**Dimethyl 2-(2-(benzyl(methyl)amino)-3-chlorobenzylidene)malonate (1d)**

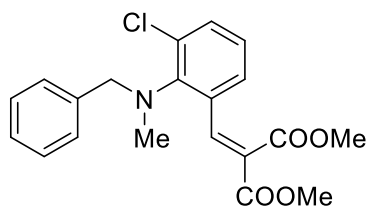

Yield 1.31 g (70%), yellow solid, m.p. 61–63 °C.

$^1\text{H}$  NMR (700 MHz, DMSO- $d_6$ )  $\delta$  ppm: 2.72 (s, 3H), 3.66 (s, 3H), 3.80 (s, 3H), 4.22 (s, 2H), 7.17 (dd,  $J=7.8, 0.8$  Hz, 1H), 7.23 (t,  $J=7.8$  Hz, 1H), 7.25 - 7.28 (m, 1H), 7.30 - 7.34 (m, 4H), 7.53 (dd,  $J=8.0, 1.1$  Hz, 1H), 8.04 (s, 1H).

$^{13}\text{C}$  NMR (75 MHz, DMSO- $d_6$ )  $\delta$  ppm: 40.0, 52.5, 52.8, 59.0, 126.6, 126.8, 127.2, 127.3, 128.3, 128.5, 132.8, 133.2, 134.6, 138.4, 141.8, 147.6, 163.7, 165.7.

HRMS (ESI-TOF) found,  $m/z$ : 374.1158  $[\text{M}+\text{H}]^+$ .  $\text{C}_{20}\text{H}_{21}\text{ClNO}_4^+$ . Calculated,  $m/z$ : 374.1154.

**Dimethyl 2-(2-(benzyl(methyl)amino)-4-chlorobenzylidene)malonate (1e)**

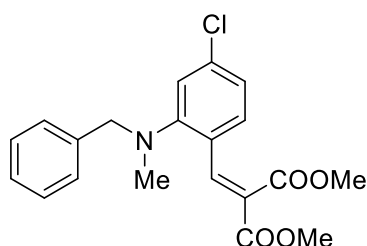

Yield 1.73 g (93%), yellow solid, m.p. 62–64 °C.

$^1\text{H}$  NMR (700 MHz, DMSO- $d_6$ )  $\delta$  ppm: 2.65 (s, 3H), 3.72 (s, 3H), 3.73 (s, 3H), 4.13 (s, 2H), 7.09 - 7.13 (m, 2H), 7.20 (d,  $J=8.0$  Hz, 1H), 7.24 - 7.29 (m, 3H), 7.32 - 7.36 (m, 2H), 7.92 (s, 1H).

$^{13}\text{C}$  NMR (75 MHz, DMSO- $d_6$ )  $\delta$  ppm: 40.4, 52.6, 52.6, 60.5, 119.7, 122.1, 125.0, 125.0, 127.4, 128.1, 128.4, 130.0, 135.8, 137.1, 140.6, 153.6, 163.9, 166.0

HRMS (ESI-TOF) found,  $m/z$ : 374.1158  $[\text{M}+\text{H}]^+$ .  $\text{C}_{20}\text{H}_{21}\text{ClNO}_4^+$ . Calculated,  $m/z$ : 374.1154.

**Dimethyl 2-(2-(benzyl(methyl)amino)-5-chlorobenzylidene)malonate (1f)**

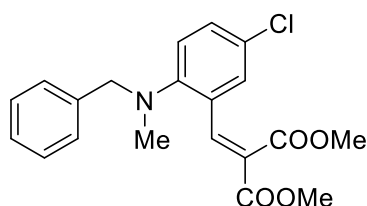

Yield 1.29 g (69%), yellow viscous oil.

$^1\text{H}$  NMR (700 MHz, DMSO- $d_6$ )  $\delta$  ppm: 2.63 (s, 3H), 3.73 (s, 3H), 3.75 (s, 3H), 4.10 (s, 2H), 7.12 (d,  $J=8.8$  Hz, 1H), 7.18 (d,  $J=2.5$  Hz, 1H), 7.24 (d,  $J=7.1$  Hz, 2H), 7.25 - 7.28 (m, 1H), 7.33 (t,  $J=7.4$  Hz, 2H), 7.43 (dd,  $J=8.6, 2.5$  Hz, 1H), 7.94 (s, 1H).

$^{13}\text{C}$  NMR (75 MHz, DMSO- $d_6$ )  $\delta$  ppm: 40.6, 52.6, 52.7, 60.6, 121.7, 125.8, 125.9, 127.3, 127.6, 128.1, 128.2, 128.4, 130.8, 137.1, 140.1, 151.1, 163.7, 165.8.

HRMS (ESI-TOF) found,  $m/z$ : 374.1159  $[\text{M}+\text{H}]^+$ .  $\text{C}_{20}\text{H}_{21}\text{ClNO}_4^+$ . Calculated,  $m/z$ : 374.1154.

**Dimethyl 2-(2-(benzyl(methyl)amino)-6-chlorobenzylidene)malonate (1f)**

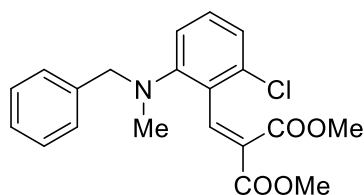

Yield 0.97 g (52%), yellow viscous oil.

$^1\text{H}$  NMR (700 MHz,  $\text{DMSO}-d_6$ )  $\delta$  ppm: 2.58 (s, 3H), 3.61 (s, 3H), 3.74 (s, 3H), 4.06 (s, 2H), 7.04 (d,  $J=8.0$  Hz, 1H), 7.15 (d,  $J=8.0$  Hz, 1H), 7.19 (d,  $J=7.3$  Hz, 2H), 7.22 - 7.27 (m, 1H), 7.27 - 7.35 (m, 3H), 7.84 (s, 1H).

$^{13}\text{C}$  NMR (75 MHz,  $\text{DMSO}-d_6$ )  $\delta$  ppm: 39.7, 52.2, 52.6, 60.3, 118.4, 123.0, 126.4, 127.1, 127.9, 128.2, 128.5, 130.6, 132.0, 137.3, 142.3, 153.0, 164.3, 164.5

HRMS (ESI-TOF) found,  $m/z$ : 374.1159  $[\text{M}+\text{H}]^+$ .  $\text{C}_{20}\text{H}_{21}\text{ClNO}_4^+$ . Calculated,  $m/z$ : 374.1154.

**Dimethyl 2-(2-(benzyl(methyl)amino)-4-bromobenzylidene)malonate (1g)**

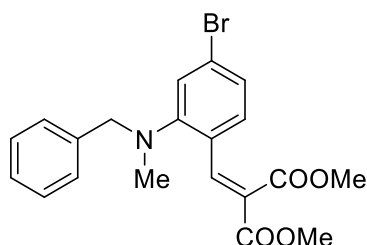

Yield 1.88 g (90%), yellow viscous oil.

$^1\text{H}$  NMR (700 MHz,  $\text{DMSO}-d_6$ )  $\delta$  ppm: 2.65 (s, 3H), 3.72 (s, 3H), 3.73 (s, 3H), 4.13 (s, 2H), 7.11 - 7.14 (m, 1H), 7.23 - 7.30 (m, 5H), 7.34 (t,  $J=7.4$  Hz, 2H), 7.91 (s, 1H).

$^{13}\text{C}$  NMR (75 MHz,  $\text{DMSO}-d_6$ )  $\delta$  ppm: 40.4, 52.6, 52.6, 60.5, 122.6, 124.7, 125.1, 125.4, 127.4, 128.1, 128.4, 130.1, 137.1, 140.7, 153.6, 163.9, 165.9.

HRMS (ESI-TOF) found,  $m/z$ : 418.0651  $[\text{M}+\text{H}]^+$ .  $\text{C}_{20}\text{H}_{21}\text{BrNO}_4^+$ . Calculated,  $m/z$ : 418.0648.

**Dimethyl 2-(2-(benzyl(methyl)amino)-5-bromobenzylidene)malonate (1h)**

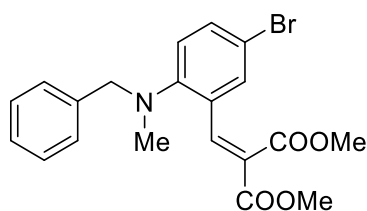

Yield 1.71 g (82%), yellow viscous oil.

$^1\text{H}$  NMR (700 MHz,  $\text{DMSO}-d_6$ )  $\delta$  ppm: 2.63 (s, 3H), 3.73 (s, 3H), 3.75 (s, 3H), 4.10 (s, 2H), 7.06 (d,  $J=8.8$  Hz, 1H), 7.24 (d,  $J=7.3$  Hz, 2H), 7.26 (t,  $J=7.3$  Hz, 1H), 7.31 (d,  $J=2.3$  Hz, 1H), 7.33 (t,  $J=7.4$  Hz, 2H), 7.54 (dd,  $J=8.8, 2.3$  Hz, 1H), 7.93 (s, 1H).

$^{13}\text{C}$  NMR (75 MHz,  $\text{DMSO}-d_6$ )  $\delta$  ppm: 40.5, 52.6, 52.7, 60.5, 113.7, 122.0, 125.8, 127.3, 128.2, 128.4, 128.4, 130.6, 133.7, 137.1, 140.1, 151.5, 163.7, 165.9

HRMS (ESI-TOF) found,  $m/z$ : 418.0653  $[\text{M}+\text{H}]^+$ .  $\text{C}_{20}\text{H}_{21}\text{BrNO}_4^+$ . Calculated,  $m/z$ : 418.0648.

**Dimethyl 2-(2-(benzyl(methyl)amino)-4-methoxybenzylidene)malonate (1i)**

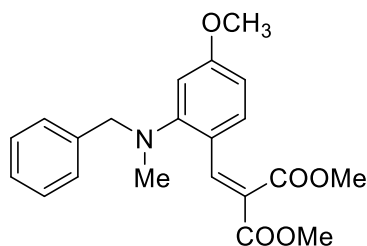

Yield 1.55 g (84%), yellow solid, m.p. 64–66 °C.

$^1\text{H}$  NMR (700 MHz, DMSO- $d_6$ )  $\delta$  ppm: 2.63 (s, 3H), 3.72 (s, 3H), 3.73 (s, 3H), 3.77 (s, 3H), 4.10 (s, 2H), 6.63 (d,  $J=2.5$  Hz, 1H), 6.67 (dd,  $J=8.7$ , 2.4 Hz, 1H), 7.19 (d,  $J=8.6$  Hz, 1H), 7.25 - 7.31 (m, 3H), 7.34 (t,  $J=7.4$  Hz, 2H), 8.01 (s, 1H).

$^{13}\text{C}$  NMR (75 MHz, DMSO- $d_6$ )  $\delta$  ppm: 40.9, 52.4, 52.4, 55.3, 60.9, 105.9, 108.1, 118.7, 122.1, 127.3, 128.2, 128.4, 129.9, 137.5, 140.7, 154.7, 162.1, 164.4, 166.7.

HRMS (ESI-TOF) found,  $m/z$ : 370.1657  $[\text{M}+\text{H}]^+$ .  $\text{C}_{21}\text{H}_{24}\text{NO}_5^+$ . Calculated,  $m/z$ : 370.1649.

**Dimethyl 2-(2-(benzyl(methyl)amino)-4-(trifluoromethyl)benzylidene)malonate (1j)**

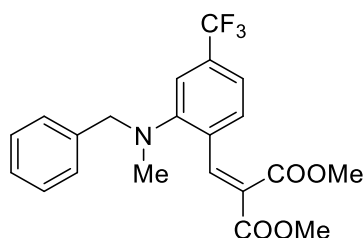

Yield 1.32 g (65%), yellow viscous oil.

$^1\text{H}$  NMR (700 MHz, DMSO- $d_6$ )  $\delta$  ppm: 2.70 (s, 3H), 3.72 (s, 3H), 3.74 (s, 3H), 4.18 (s, 2H), 7.25 - 7.29 (m, 3H), 7.32 - 7.36 (m, 3H), 7.39 (s, 2H), 7.96 (s, 1H).

$^{13}\text{C}$  NMR (176 MHz, DMSO- $d_6$ )  $\delta$  ppm: 40.3, 52.5, 52.6, 60.3, 115.8 (q,  $J=3.7$  Hz), 118.3 (q,  $J=3.3$  Hz), 123.8 (q,  $J=272.7$  Hz), 126.5, 127.3, 128.0, 128.3, 129.5, 130.2, 130.9 (q,  $J=31.8$  Hz), 137.0, 140.6, 152.5, 163.6, 165.5.

HRMS (ESI-TOF) found,  $m/z$ : 408.1423  $[\text{M}+\text{H}]^+$ .  $\text{C}_{21}\text{H}_{21}\text{F}_3\text{NO}_4^+$ . Calculated,  $m/z$ : 408.1417.

**Dimethyl 2-(2-(benzyl(methyl)amino)-5-(trifluoromethyl)benzylidene)malonate (1k)**

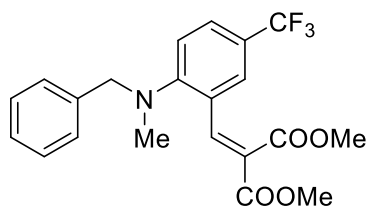

Yield 0.96 g (47%), yellow viscous oil.

$^1\text{H}$  NMR (700 MHz, DMSO- $d_6$ )  $\delta$  ppm: 2.75 (s, 3H), 3.70 (s, 3H), 3.72 (s, 3H), 4.26 (s, 2H), 7.23 (d,  $J=8.6$  Hz, 1H), 7.25 (d,  $J=7.1$  Hz, 2H), 7.28 (t,  $J=7.3$  Hz, 1H), 7.35 (t,  $J=7.5$  Hz, 2H), 7.45 (d,  $J=1.3$  Hz, 1H), 7.70 (dd,  $J=8.8, 1.9$  Hz, 1H), 7.90 (s, 1H).

$^{13}\text{C}$  NMR (176 MHz, DMSO- $d_6$ )  $\delta$  ppm: 40.2, 52.4, 52.7, 59.9, 119.5, 121.2 (q,  $J=32.5$  Hz), 124.2 (q,  $J=271.0$  Hz), 125.3, 125.4 (q,  $J=3.7$  Hz), 125.8, 127.3, 127.8 (q,  $J=3.7$  Hz), 127.8, 128.4, 137.0, 140.8, 155.0, 163.6, 165.8.

HRMS (ESI-TOF) found,  $m/z$ : 408.1415  $[\text{M}+\text{H}]^+$ .  $\text{C}_{21}\text{H}_{21}\text{F}_3\text{NO}_4^+$ . Calculated,  $m/z$ : 408.1417.

**Dimethyl 2-(2-(benzyl(ethyl)amino)-5-bromobenzylidene)malonate (1l)**

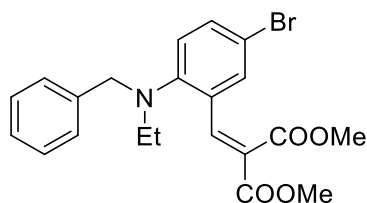

Yield 1.53 g (71%), yellow viscous oil.

$^1\text{H}$  NMR (700 MHz, DMSO- $d_6$ )  $\delta$  ppm: 1.01 (t,  $J=7.0$  Hz, 3H), 3.00 (q,  $J=7.0$  Hz, 2H), 3.72 (s, 3H), 3.78 (s, 3H), 4.20 (s, 2H), 7.11 (d,  $J=8.8$  Hz, 1H), 7.21 (t,  $J=7.3$  Hz, 1H), 7.24 (d,  $J=7.1$  Hz, 2H), 7.27 - 7.31 (m, 3H), 7.50 (dd,  $J=8.7, 2.4$  Hz, 1H), 7.94 (s, 1H).

$^{13}\text{C}$  NMR (75 MHz, DMSO- $d_6$ )  $\delta$  ppm: 12.1, 48.2, 52.6, 52.8, 56.1, 114.0, 123.7, 125.8, 127.1, 128.1, 128.3, 129.9, 130.5, 133.3, 137.8, 140.0, 149.9, 163.7, 165.9.

HRMS (ESI-TOF) found,  $m/z$ : 432.0812  $[\text{M}+\text{H}]^+$ .  $\text{C}_{21}\text{H}_{23}\text{BrNO}_4^+$ . Calculated,  $m/z$ : 432.0805.

**Dimethyl 2-(2-(benzyl(ethyl)amino)-4-methoxybenzylidene)malonate (1m)**

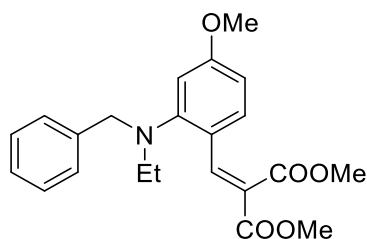

Yield 1.72 g (90%), yellow viscous oil.

$^1\text{H}$  NMR (700 MHz, DMSO- $d_6$ )  $\delta$  ppm: 1.02 (t,  $J=7.0$  Hz, 3H), 3.00 (q,  $J=7.0$  Hz, 2H), 3.72 (s, 3H), 3.73 (s, 3H), 3.76 (s, 3H), 4.22 (s, 2H), 6.64 (dd,  $J=8.6, 2.5$  Hz, 1H), 6.67 (d,  $J=2.5$  Hz, 1H), 7.18 (d,  $J=8.6$  Hz, 1H), 7.19 - 7.23 (m, 1H), 7.27 - 7.31 (m, 4H), 8.03 (s, 1H).

$^{13}\text{C}$  NMR (75 MHz, DMSO- $d_6$ )  $\delta$  ppm: 12.0, 48.8, 52.4, 55.3, 56.0, 107.5, 108.4, 120.1, 122.0, 127.0, 128.0, 128.3, 129.7, 138.3, 140.6, 153.0, 161.8, 164.4, 166.8.

HRMS (ESI-TOF) found,  $m/z$ : 384.1813  $[\text{M}+\text{H}]^+$ .  $\text{C}_{22}\text{H}_{26}\text{NO}_5^+$ . Calculated,  $m/z$ : 384.1805.

**Dimethyl 2-(2-(diethylamino)benzylidene)malonate (1n)**

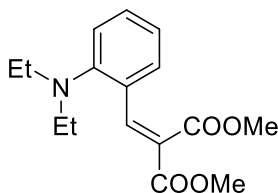

Yield 1.32 g (91%), yellow viscous oil.

$^1\text{H}$  NMR (700 MHz, DMSO- $d_6$ )  $\delta$  ppm: 0.98 (t  $J=7.1$  Hz, 6H), 3.03 (q,  $J=7.1$  Hz, 4H), 3.71 (s, 3H), 3.79 (s, 3H), 7.05 (t,  $J=7.3$  Hz, 1H), 7.19 (d,  $J=8.0$  Hz, 1H), 7.23 (d,  $J=6.9$  Hz, 1H), 7.38 - 7.43 (m, 1H), 7.93 (s, 1H).

$^{13}\text{C}$  NMR (75 MHz, DMSO- $d_6$ )  $\delta$  ppm: 12.4, 47.3, 52.4, 52.5, 121.0, 122.3, 124.1, 128.0, 128.4, 131.0, 141.3, 151.2, 164.2, 166.4.

HRMS (ESI-TOF) found,  $m/z$ : 292.1543  $[\text{M}+\text{H}]^+$ .  $\text{C}_{16}\text{H}_{22}\text{NO}_4^+$ . Calculated,  $m/z$ : 292.1543.

**Dimethyl 2-(2-(benzyl(methyl)amino)-5-nitrobenzylidene)malonate (1p)**

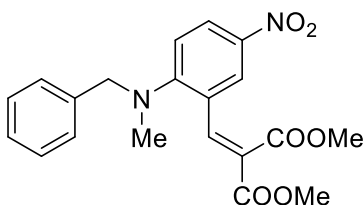

Yield 1.40 g (73%), yellow solid, m.p. 89–91 °C.

$^1\text{H}$  NMR (700 MHz, DMSO- $d_6$ )  $\delta$  ppm: 2.89 (s, 3H), 3.69 (s, 3H), 3.75 (s, 3H), 4.46 (s, 2H), 7.15 (d,  $J=9.2$  Hz, 1H), 7.23 (d,  $J=7.4$  Hz, 2H), 7.29 (t,  $J=7.3$  Hz, 1H), 7.36 (t,  $J=7.5$  Hz, 2H), 7.78 (s, 1H), 8.02 (d,  $J=2.7$  Hz, 1H), 8.16 (dd,  $J=9.2, 2.7$  Hz, 1H).

$^{13}\text{C}$  NMR (75 MHz, DMSO- $d_6$ )  $\delta$  ppm: 40.3, 52.6, 52.7, 59.4, 118.0, 122.8, 125.0, 125.7, 126.2, 127.4, 128.6, 136.8, 139.2, 141.1, 156.8, 163.5, 165.6.

HRMS (ESI-TOF) found,  $m/z$ : 385.1399  $[\text{M}+\text{H}]^+$ .  $\text{C}_{20}\text{H}_{21}\text{N}_2\text{O}_6^+$ . Calculated,  $m/z$ : 385.1394.

**Dimethyl 2-(2-(dimethylamino)benzylidene)malonate (1r)**

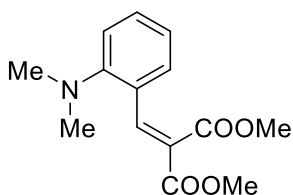

Yield 1.20 g (91%), yellow solid, m.p. 79–81 °C.

$^1\text{H}$  NMR (700 MHz, DMSO- $d_6$ )  $\delta$  ppm: 2.70 (s, 6 H), 3.71 (s, 3 H), 3.79 (s, 3 H), 6.99 - 7.04 (m, 1 H), 7.13 (d,  $J=7.6$  Hz, 1 H), 7.20 (dd,  $J=7.8, 1.3$  Hz, 1 H), 7.37 - 7.42 (m, 1 H), 7.85 (s, 1 H).

$^{13}\text{C}$  NMR (75 MHz, DMSO- $d_6$ )  $\delta$  ppm: 44.5, 52.4, 52.6, 118.2, 121.8, 124.0, 125.6, 128.5, 131.5, 141.3, 153.6, 164.3, 166.3.

HRMS (ESI-TOF) found,  $m/z$ : 264.1232  $[\text{M}+\text{H}]^+$ .  $\text{C}_{14}\text{H}_{18}\text{NO}_4^+$ . Calculated,  $m/z$ : 264.1230.

#### 4. NMR study on the reaction intermediates

**1a** (20.0 mg, 0.059 mmol, 1 eq.) was dissolved in dry degassed C<sub>2</sub>H<sub>4</sub>Cl<sub>2</sub> (0.6 mL) in a standard NMR tube in argon. Then freshly distilled BF<sub>3</sub>·Et<sub>2</sub>O (16.7 mg, 0.118 mmol, 2 eq.) was carefully added and the reaction vessel was sealed. The resulted solution was shaken for 3 min and the sample was stored for 24 h at 25 °C. <sup>1</sup>H NMR spectrum of the reaction mixture was recorded on a 300 MHz Bruker Avance Neo at 293 K without any additional deuterated solvents. <sup>11</sup>B and <sup>19</sup>F NMR spectra were recorded on a 300 MHz Bruker Avance III-HD at 293 K. 3D shimming was made on C<sub>2</sub>H<sub>4</sub>Cl<sub>2</sub> signal.

We also recorded <sup>1</sup>H NMR spectrum of **1a** in C<sub>2</sub>H<sub>4</sub>Cl<sub>2</sub> and <sup>11</sup>B and <sup>19</sup>F NMR spectra of BF<sub>3</sub>·Et<sub>2</sub>O in C<sub>2</sub>H<sub>4</sub>Cl<sub>2</sub> in the similar manner.

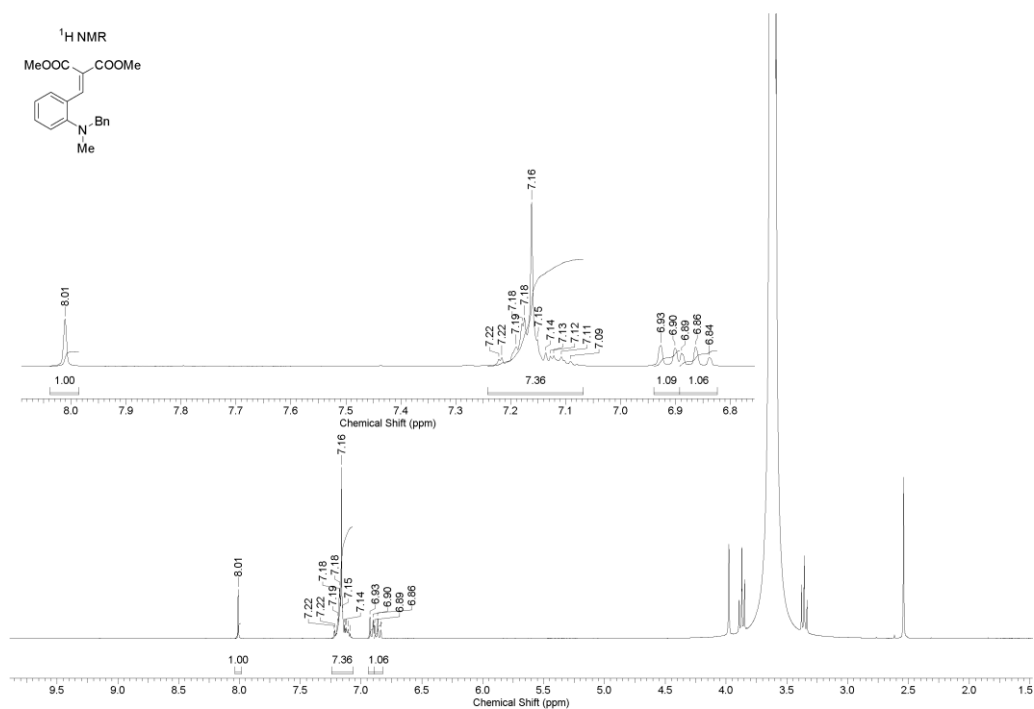

Figure S1. <sup>1</sup>H NMR spectrum of the compound **1a** in C<sub>2</sub>H<sub>4</sub>Cl<sub>2</sub>.

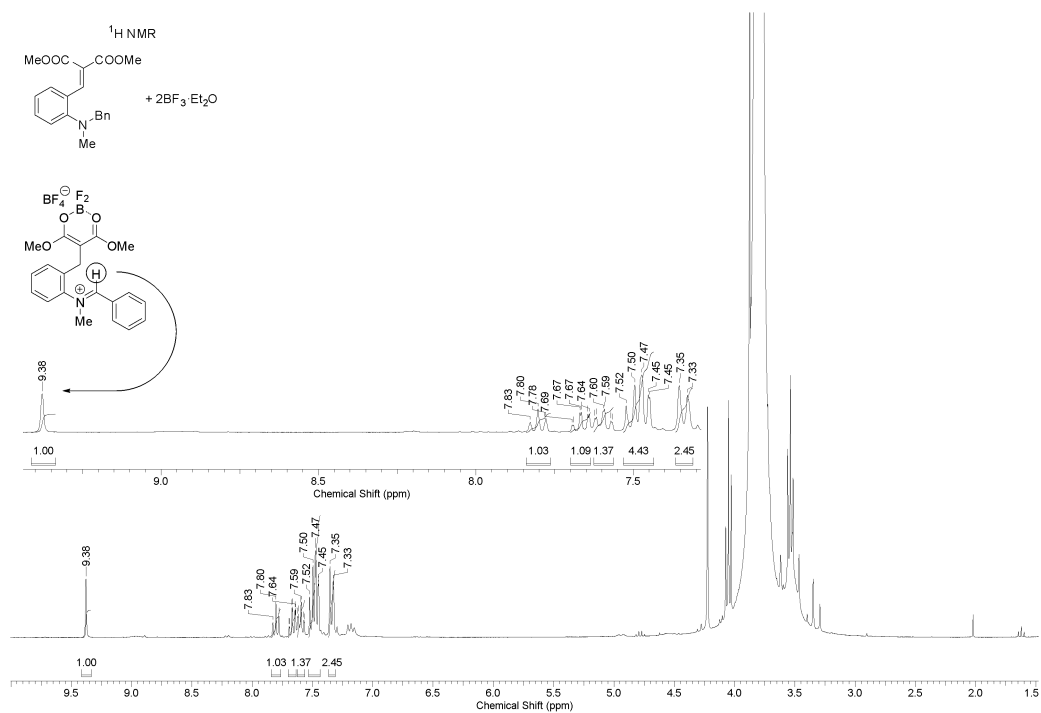

Figure S2. <sup>1</sup>H NMR spectrum of the reaction mixture in C<sub>2</sub>H<sub>4</sub>Cl<sub>2</sub>.

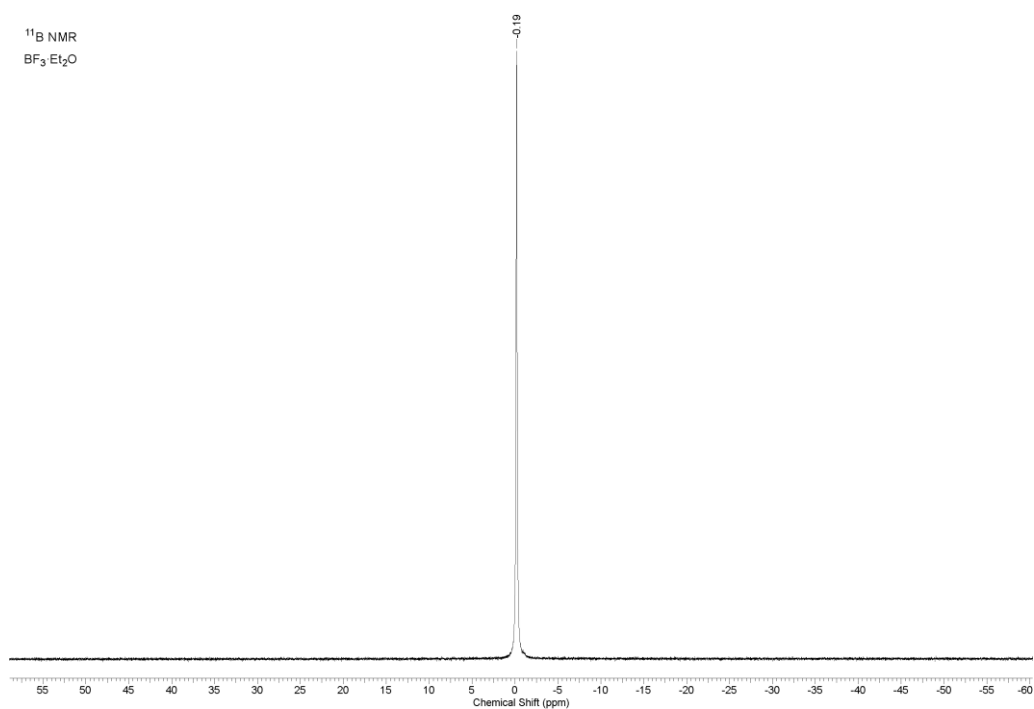

Figure S3. <sup>11</sup>B NMR spectrum of BF<sub>3</sub> in C<sub>2</sub>H<sub>4</sub>Cl<sub>2</sub>.

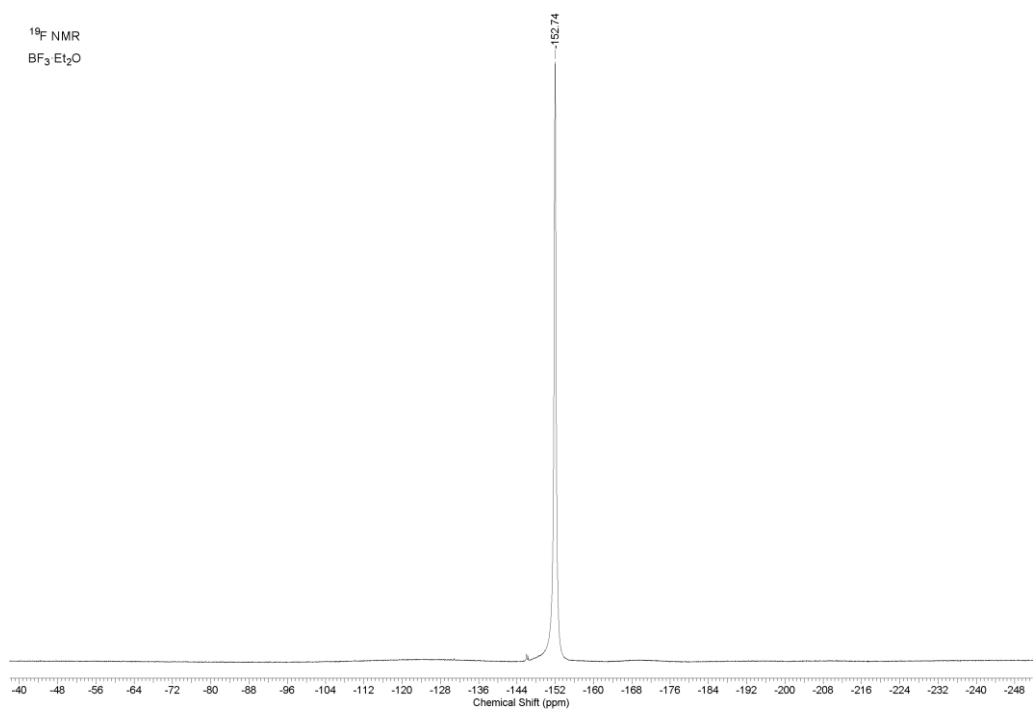

Figure S4. <sup>19</sup>F NMR spectrum of BF<sub>3</sub> in C<sub>2</sub>H<sub>4</sub>Cl<sub>2</sub>.

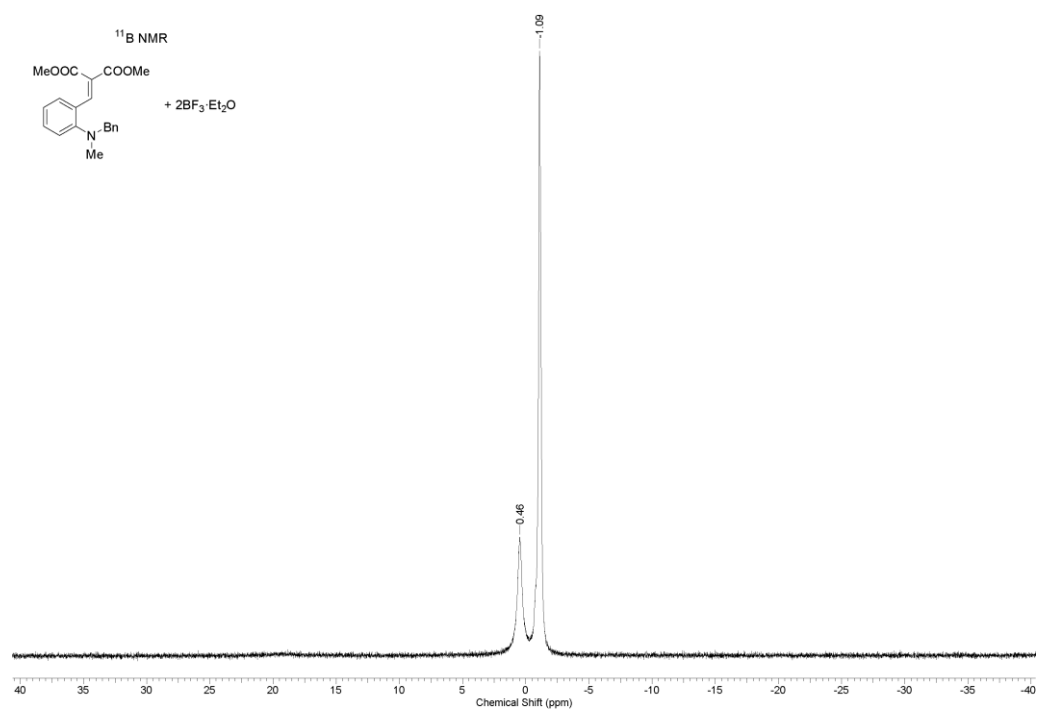

Figure S5. <sup>11</sup>B NMR spectrum of the reaction mixture in C<sub>2</sub>H<sub>4</sub>Cl<sub>2</sub>.

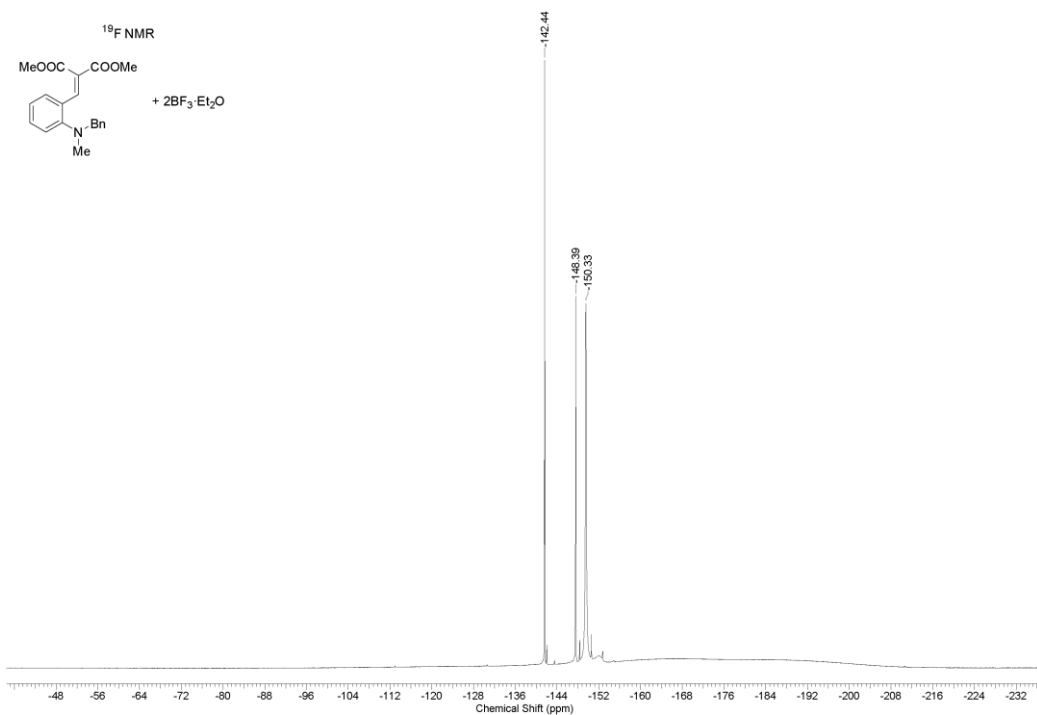

Figure S6. <sup>19</sup>F NMR spectrum of the reaction mixture in C<sub>2</sub>H<sub>4</sub>Cl<sub>2</sub>.

## 5. References

- [1] Yang, P.; Xu, W.; Wang, R.; Zhang, M.; Xie, C.; Zeng, X.; Wang, M., *Org. Lett.* **2019**, *21*, 3658–3662.
- [2] Murarka, S.; Deb, I.; Zhang, C.; Seidel, D., *J. Am. Chem. Soc.* **2009**, *131*, 13226–13227.
- [3] Zaitseva, E. R.; Smirnov, A. Y.; Myasnyanko, I. N.; Mineev, K. S.; Sokolov, A. I.; Volkhina, T. N.; Mikhaylov, A. A.; Baleeva, N. S.; Baranov, M. S., *New J. Chem.* **2021**, *45*, 1805–1808.
- [4] Josa-Culler , L.; Hirst, M. G.; Lockett, J. P.; Thompson, A. L.; Moloney, M. G., *J. Org. Chem.* **2019**, *84*, 9671–9683.
- [5] Rosevear, J.; Wilshire, J. F. K., *Aust. J. Chem.* **1981**, *34*, 839.
- [6] Mori, K.; Ehara, K.; Kurihara, K.; Akiyama, T., *J. Am. Chem. Soc.* **2011**, *133*, 6166–6169.

## 6. Copies of $^1\text{H}$ and $^{13}\text{C}$ NMR spectra

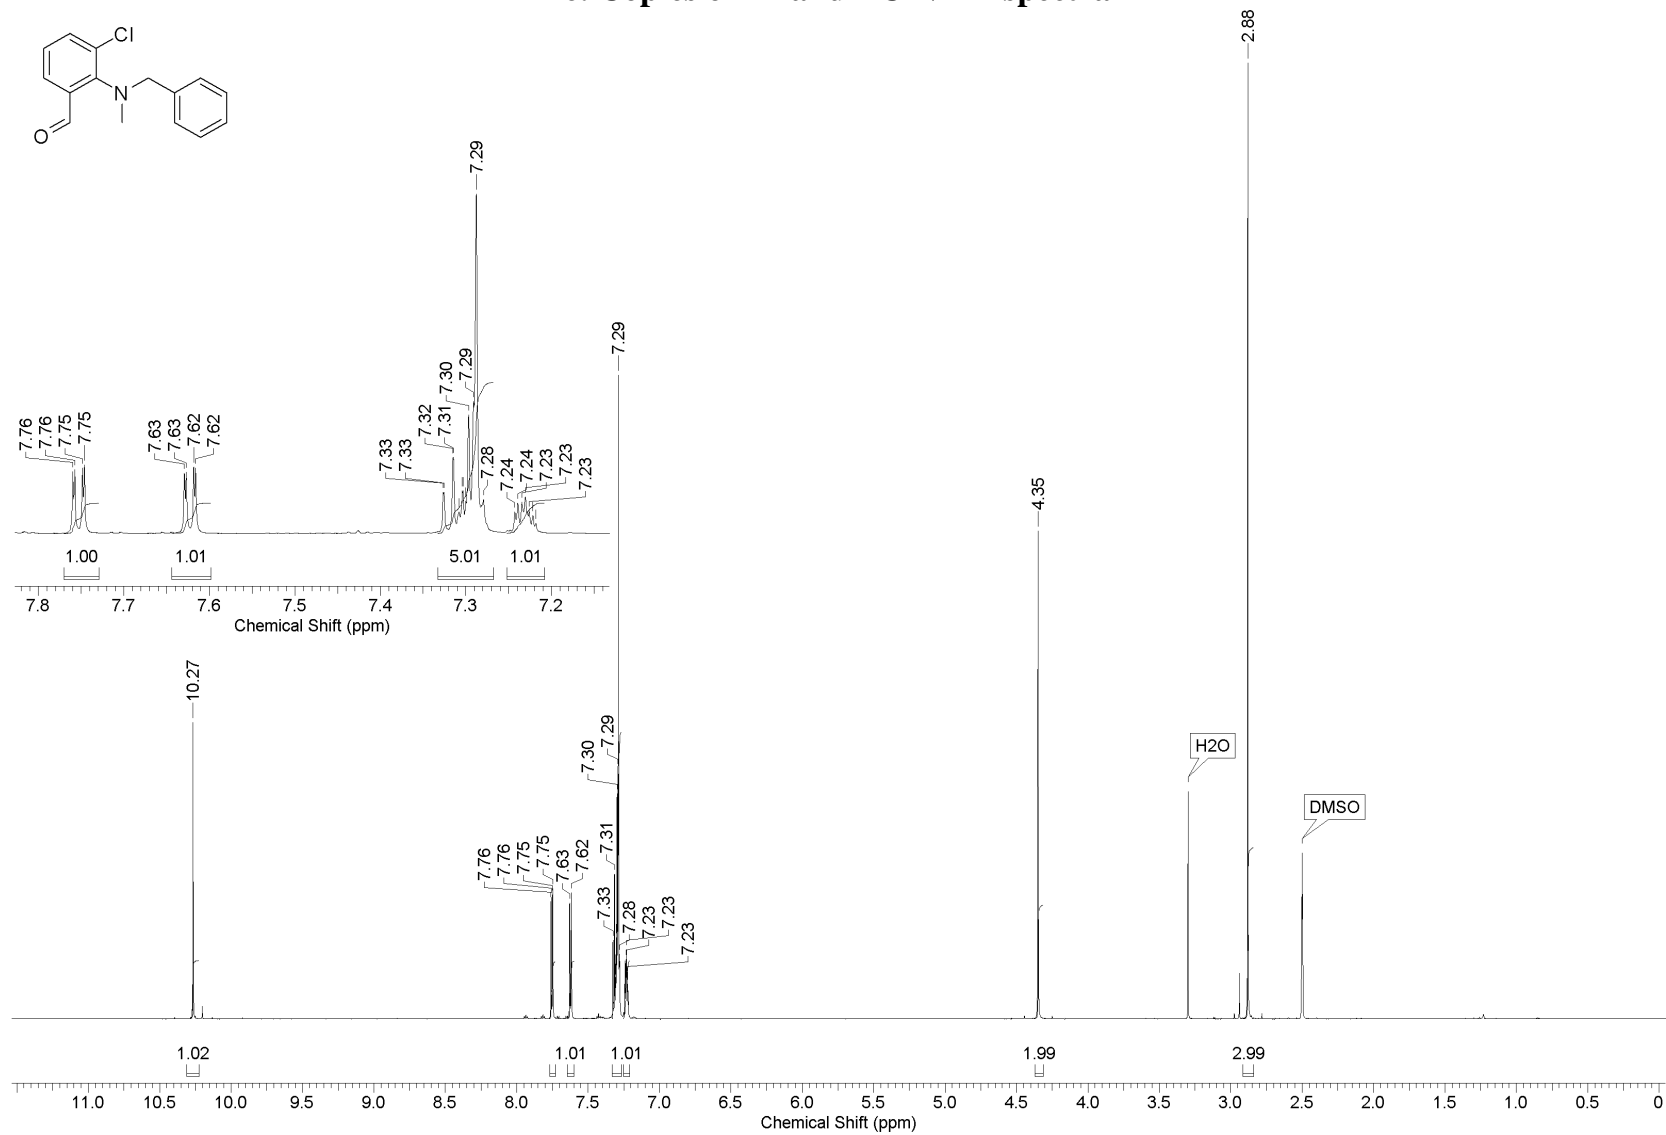

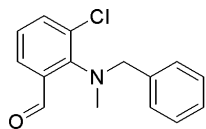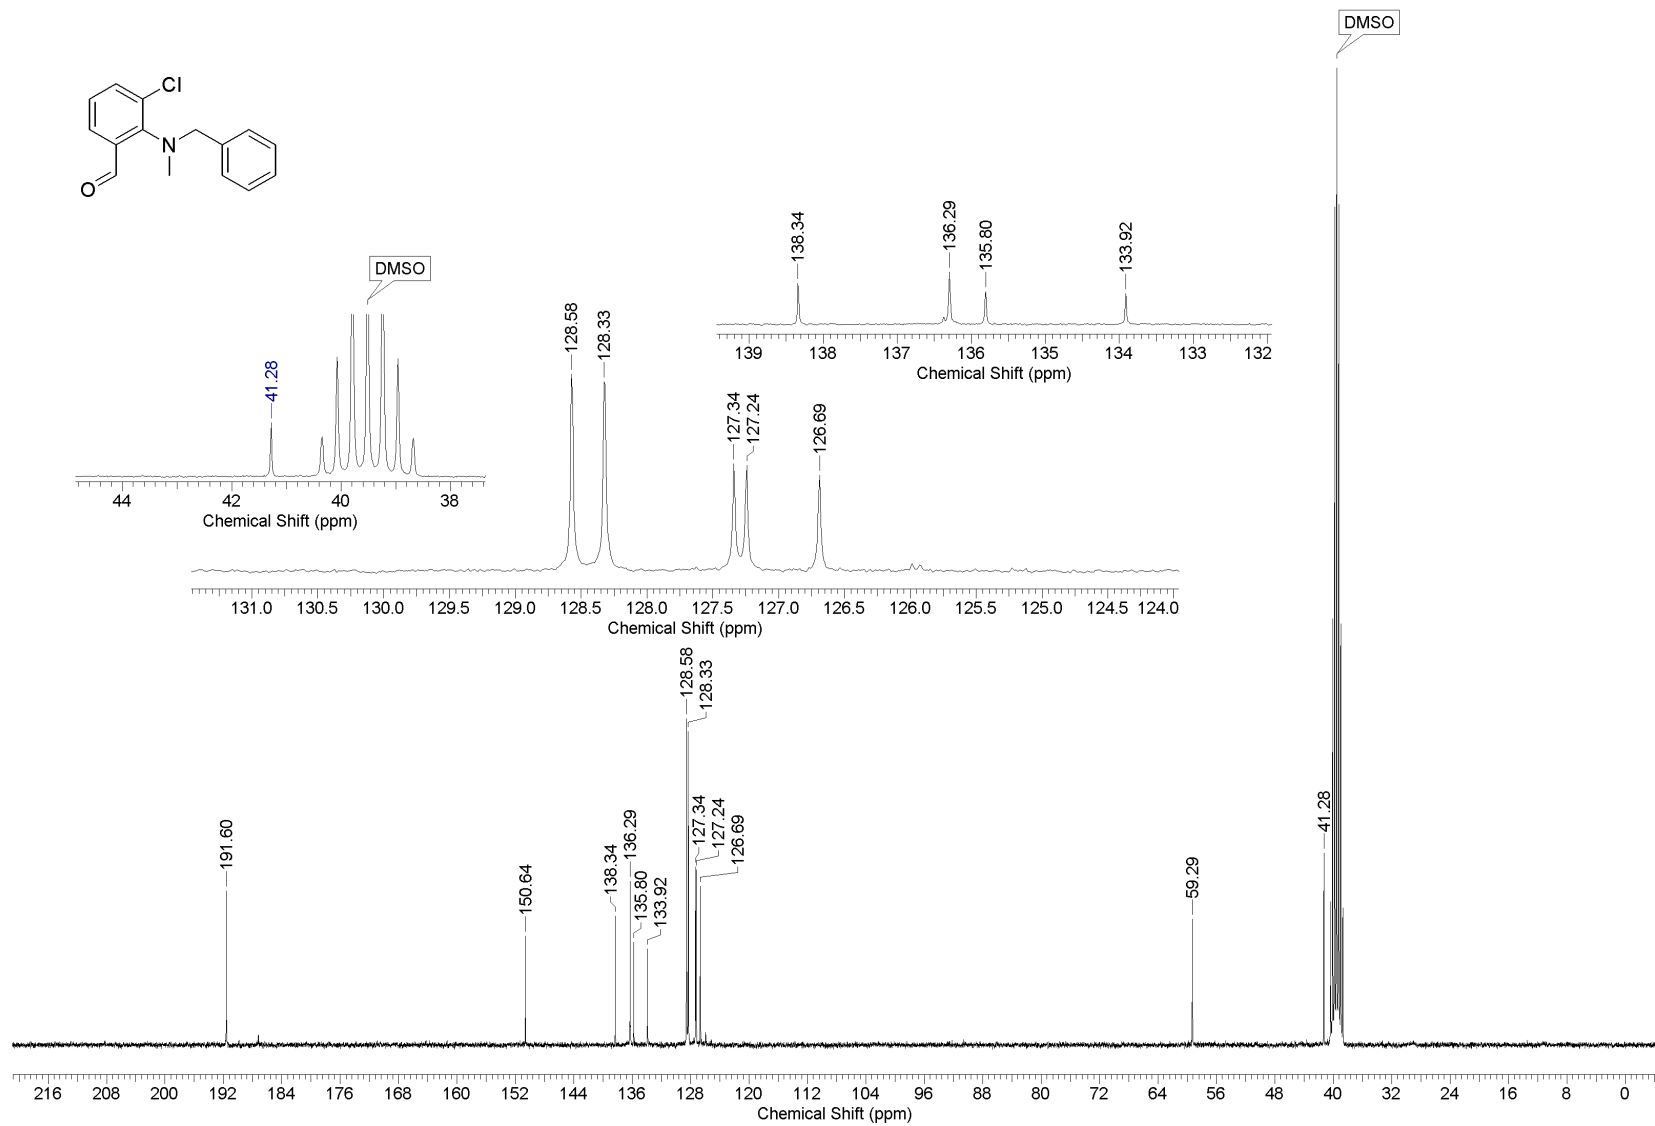

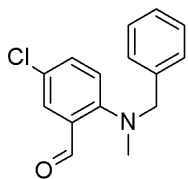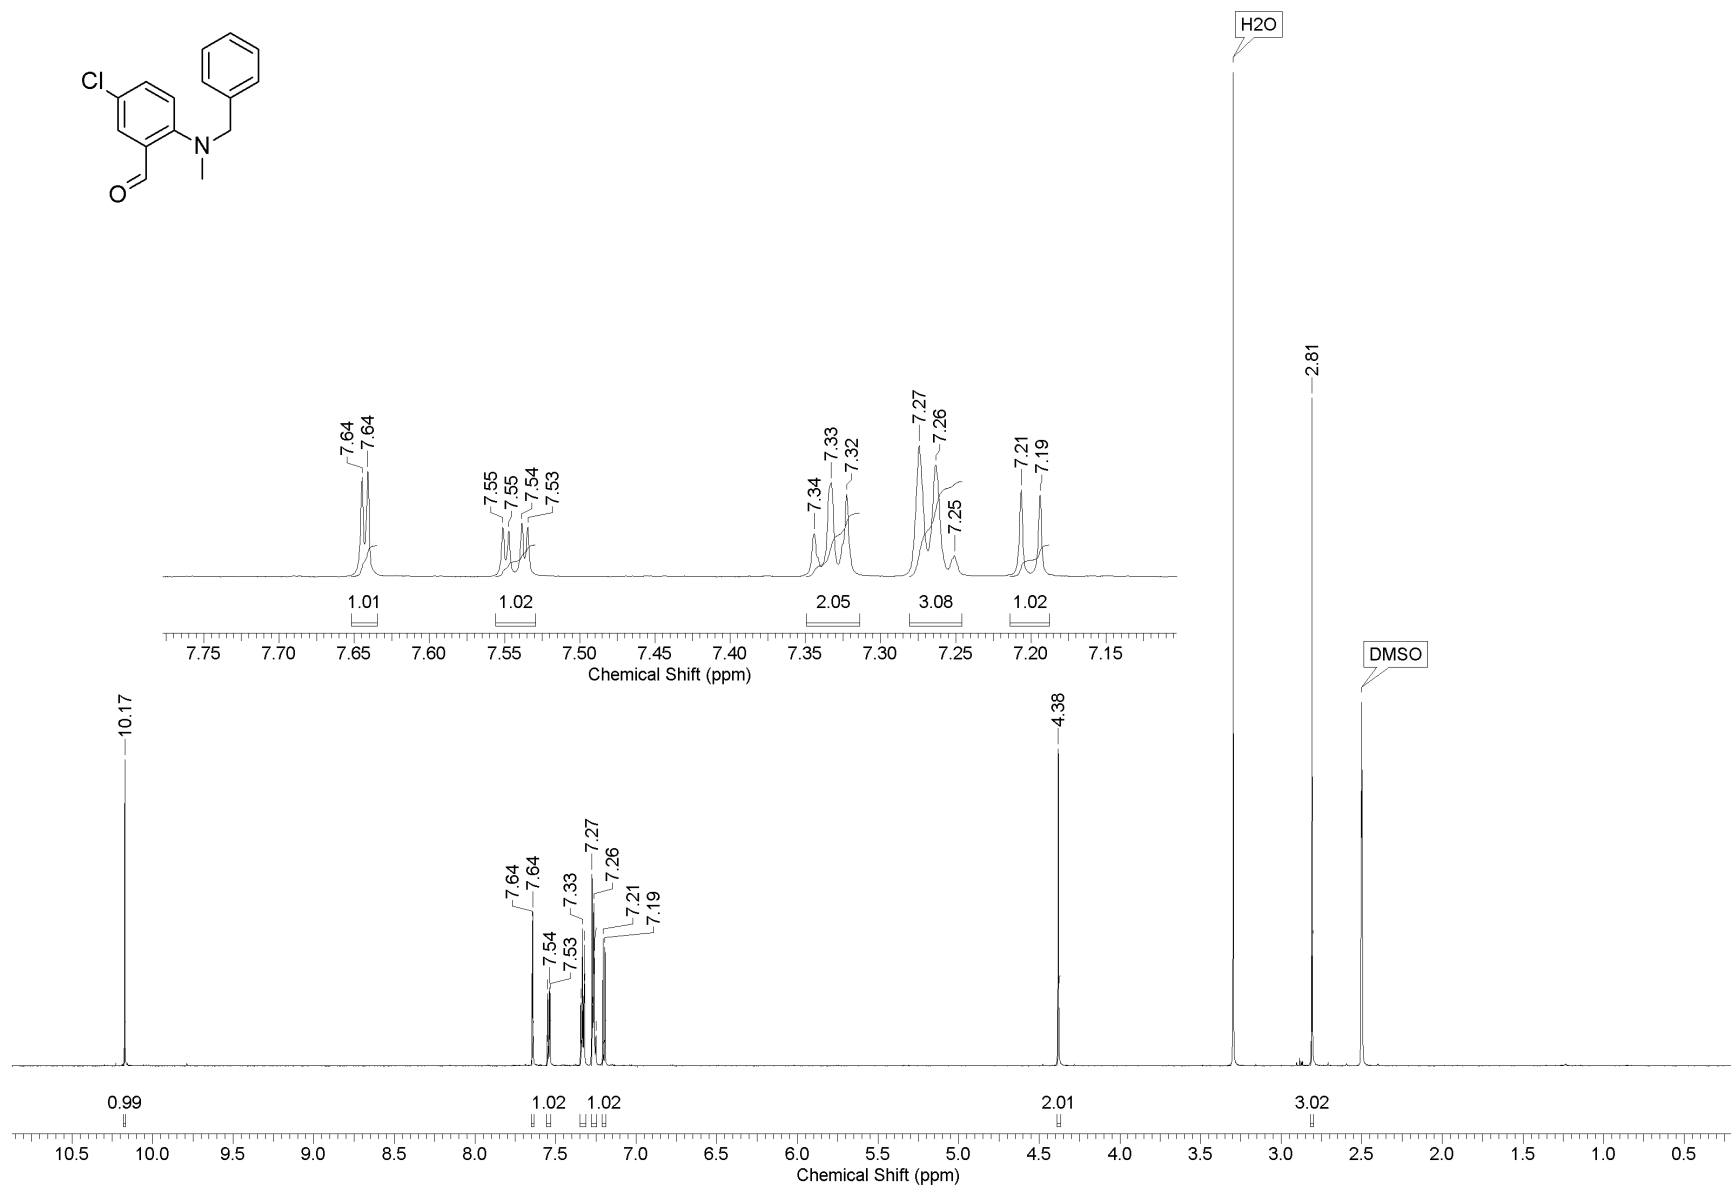

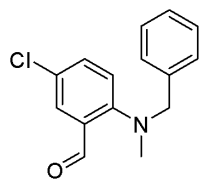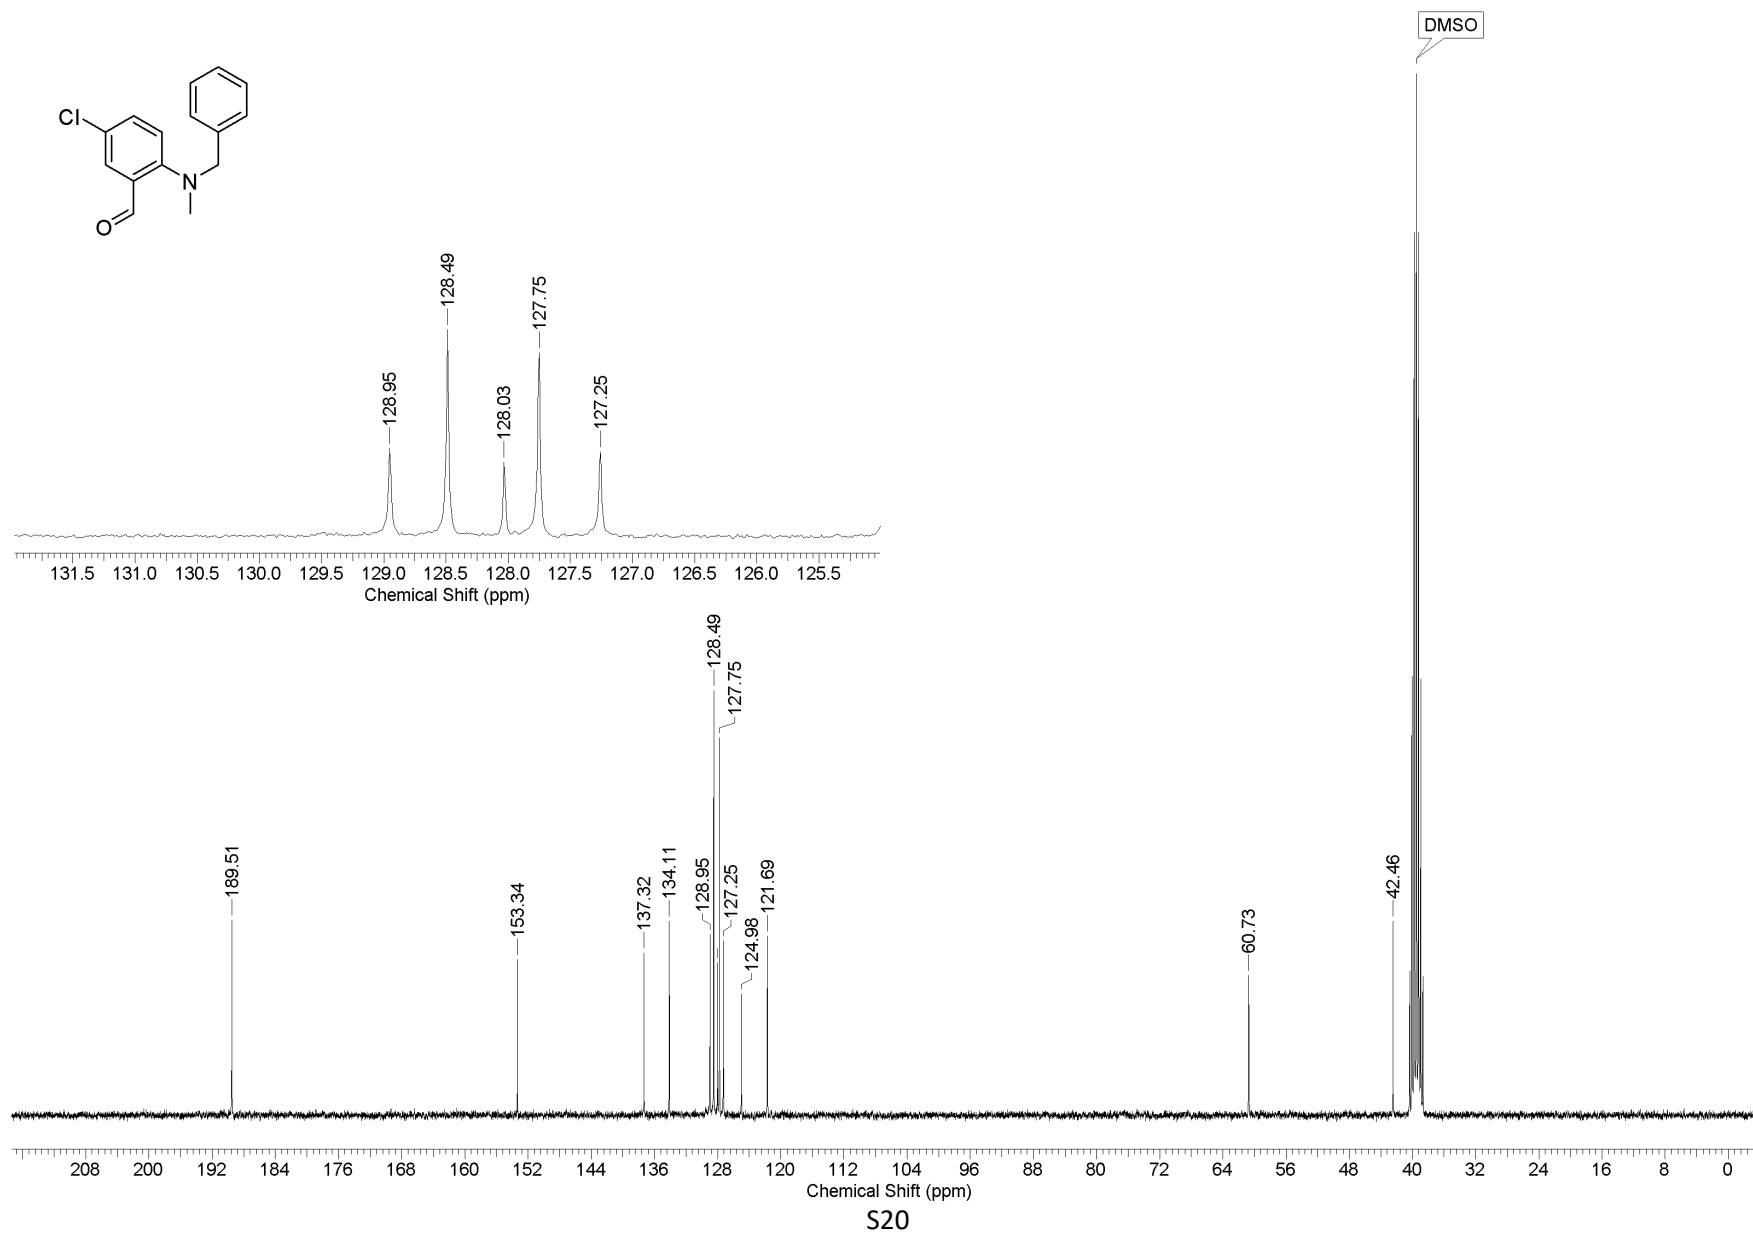

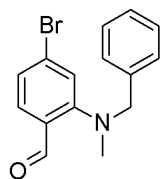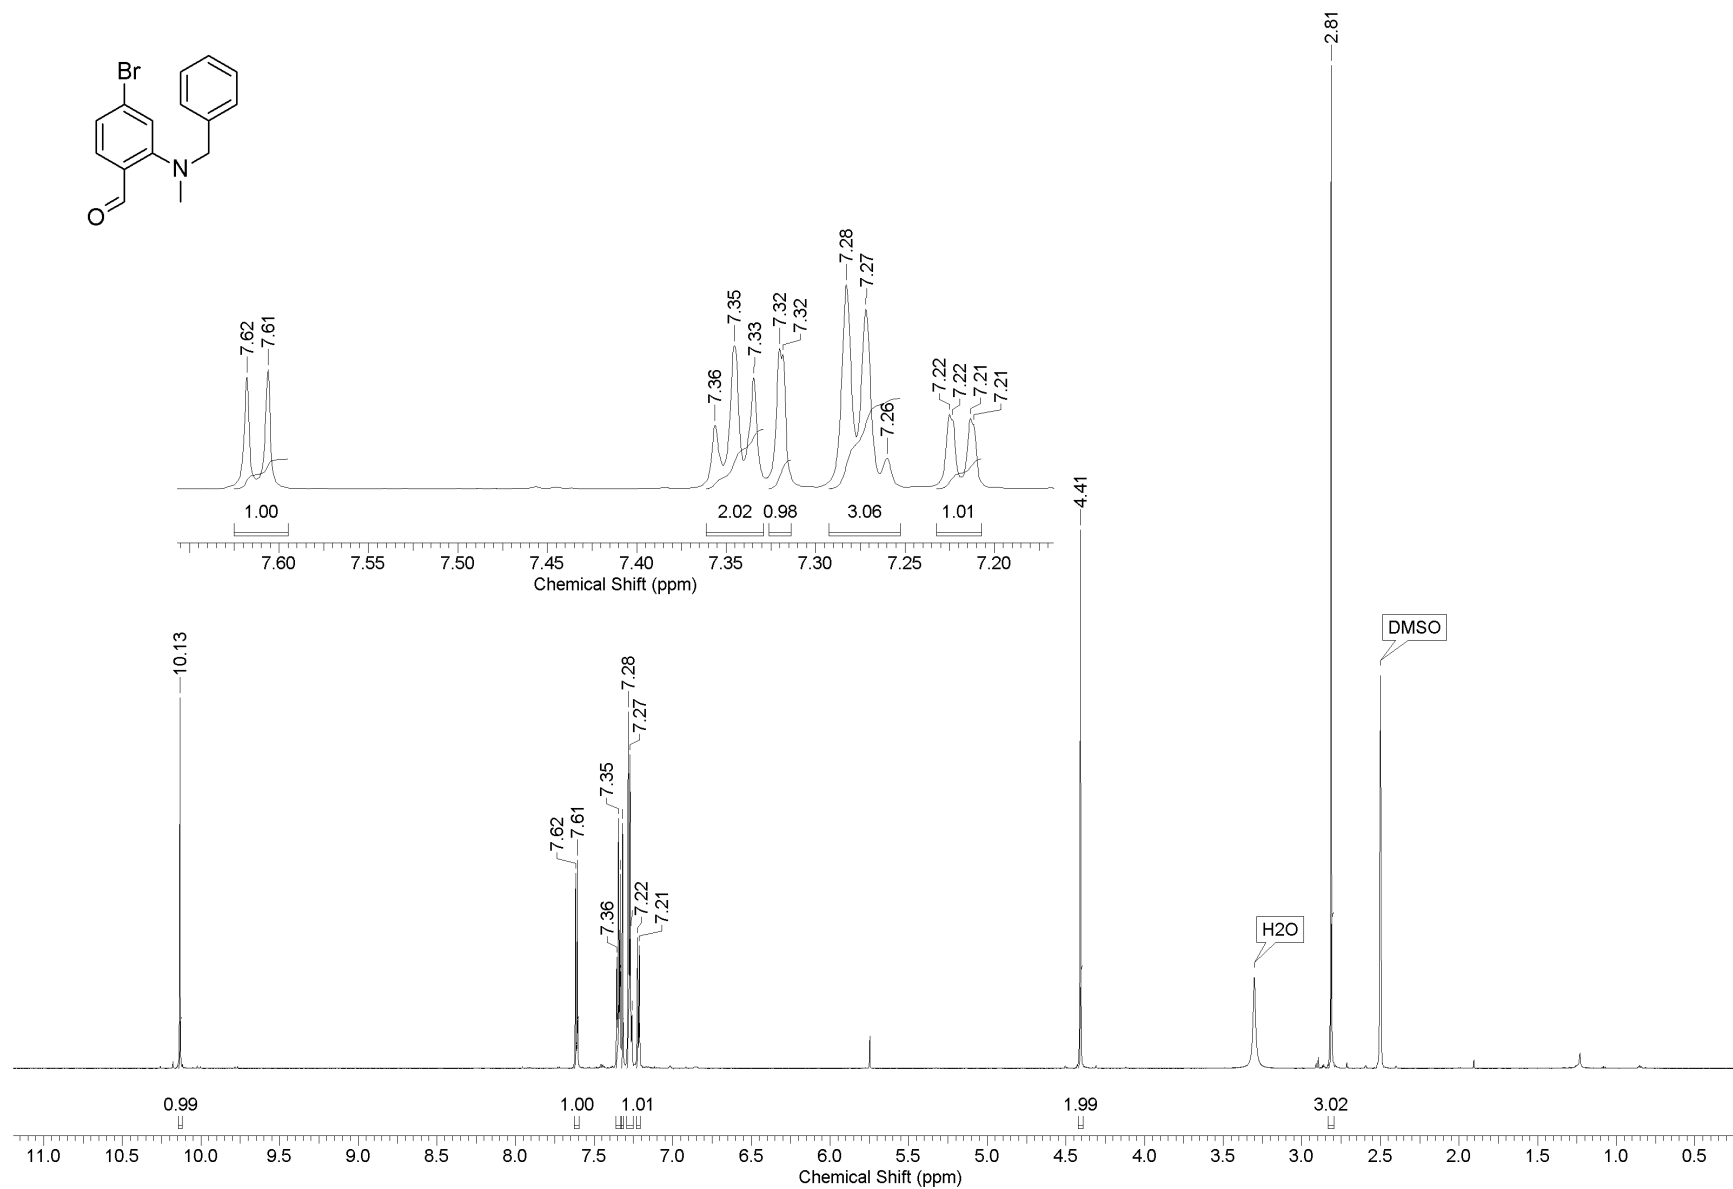

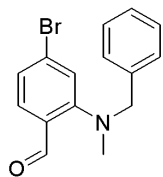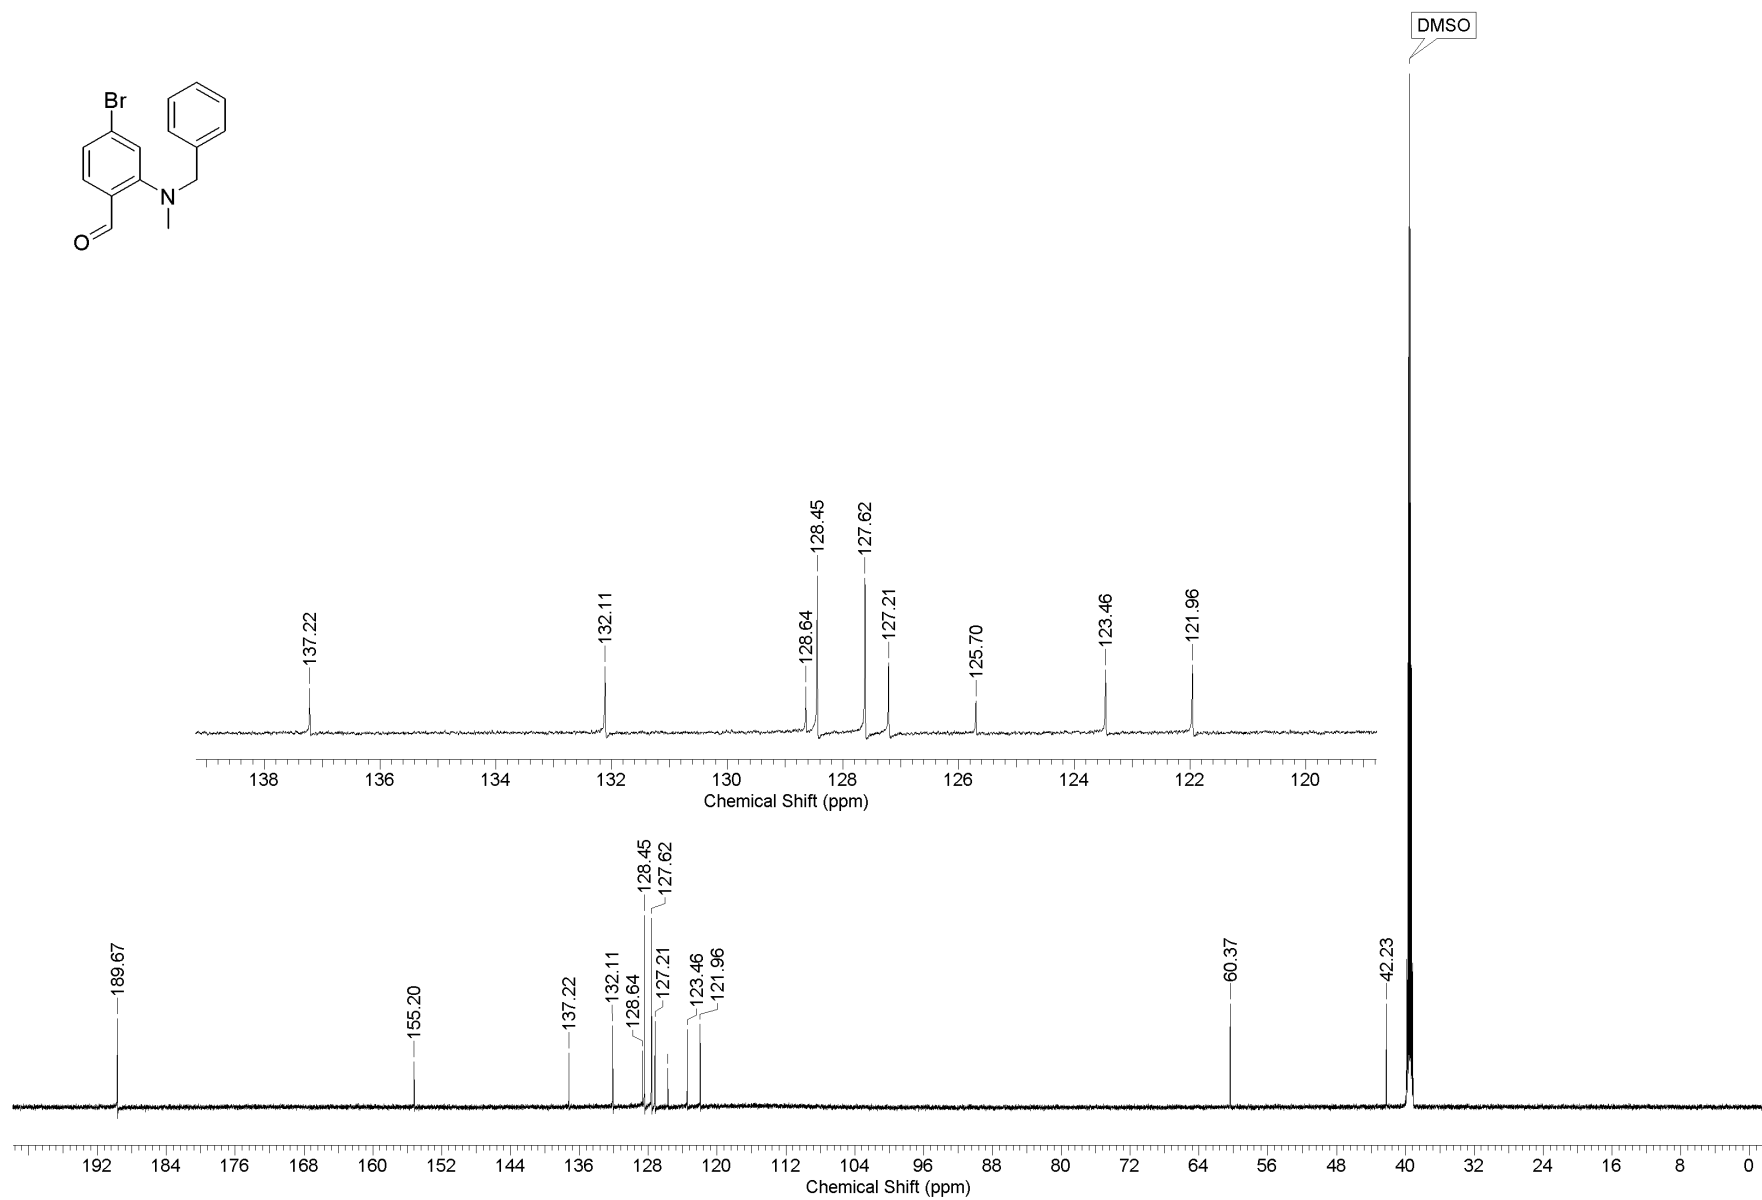

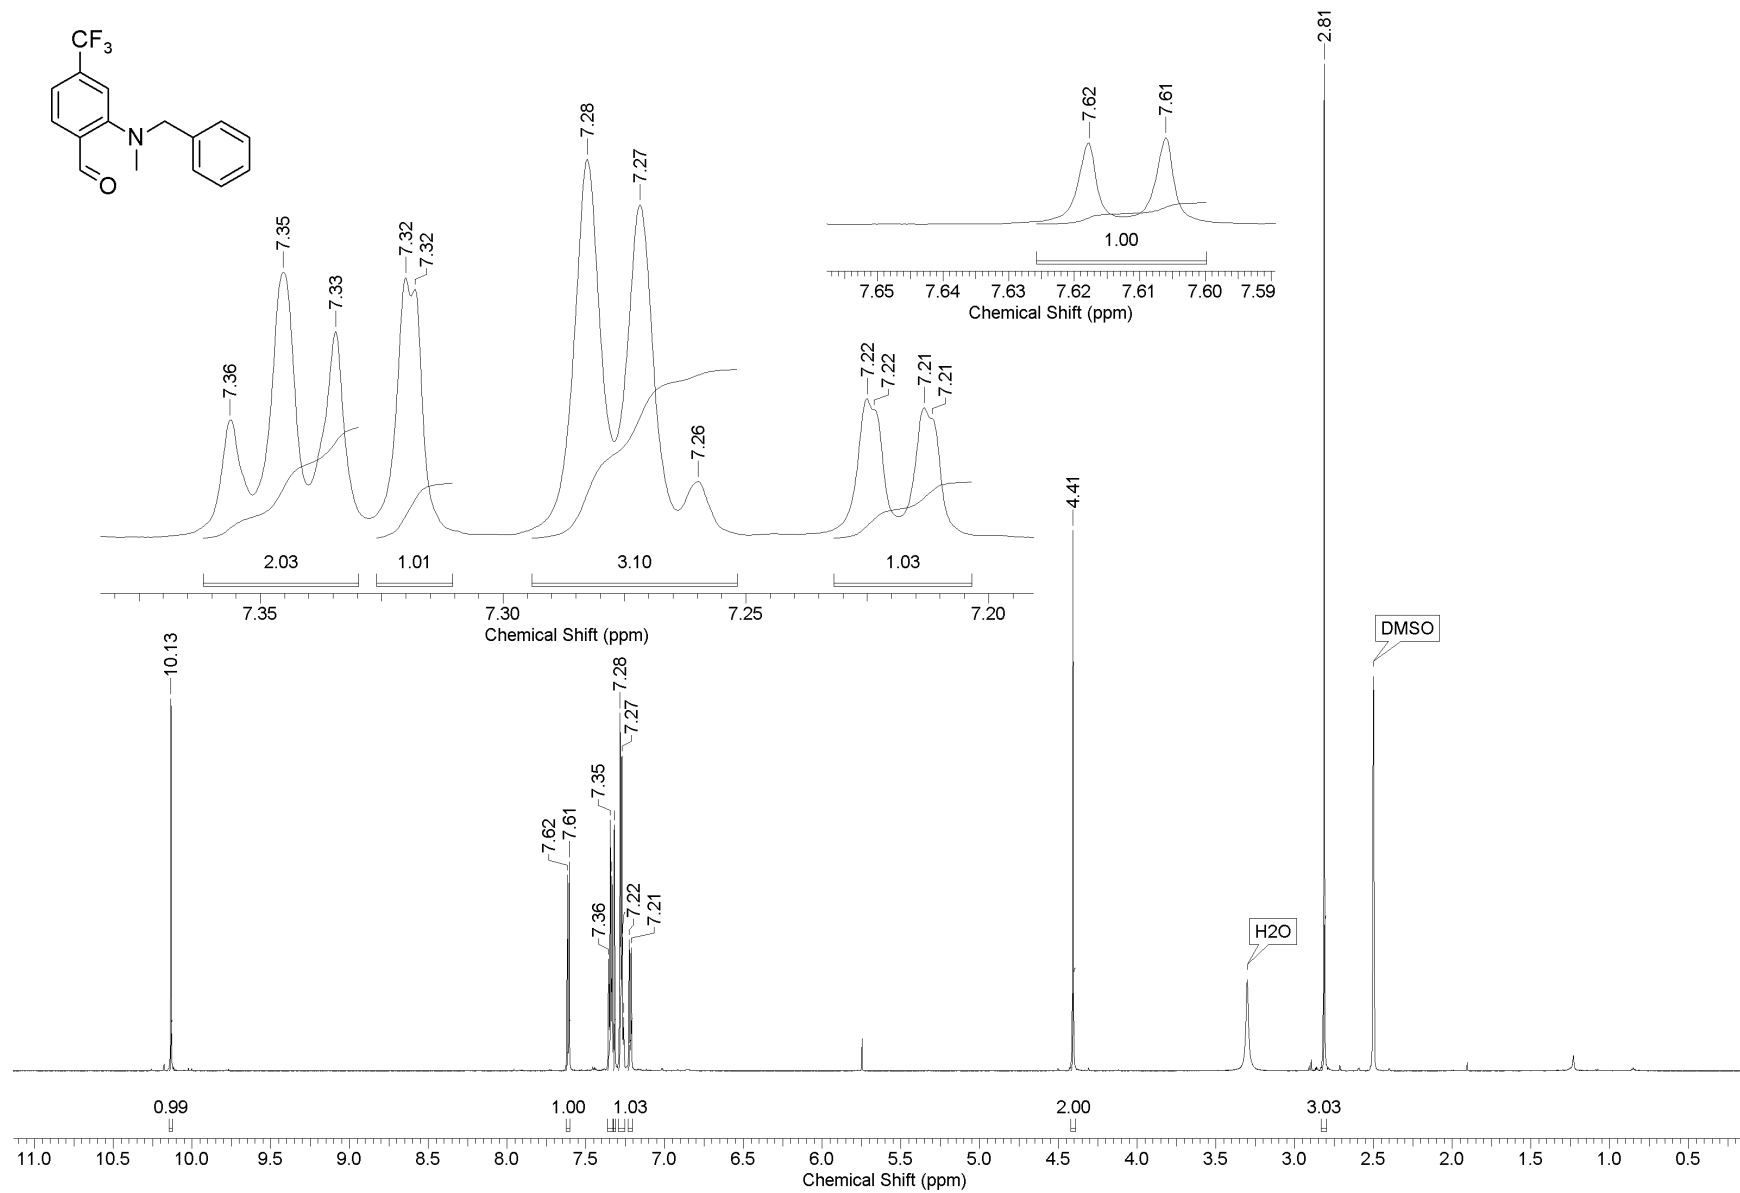

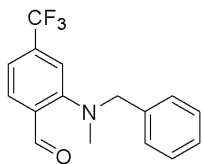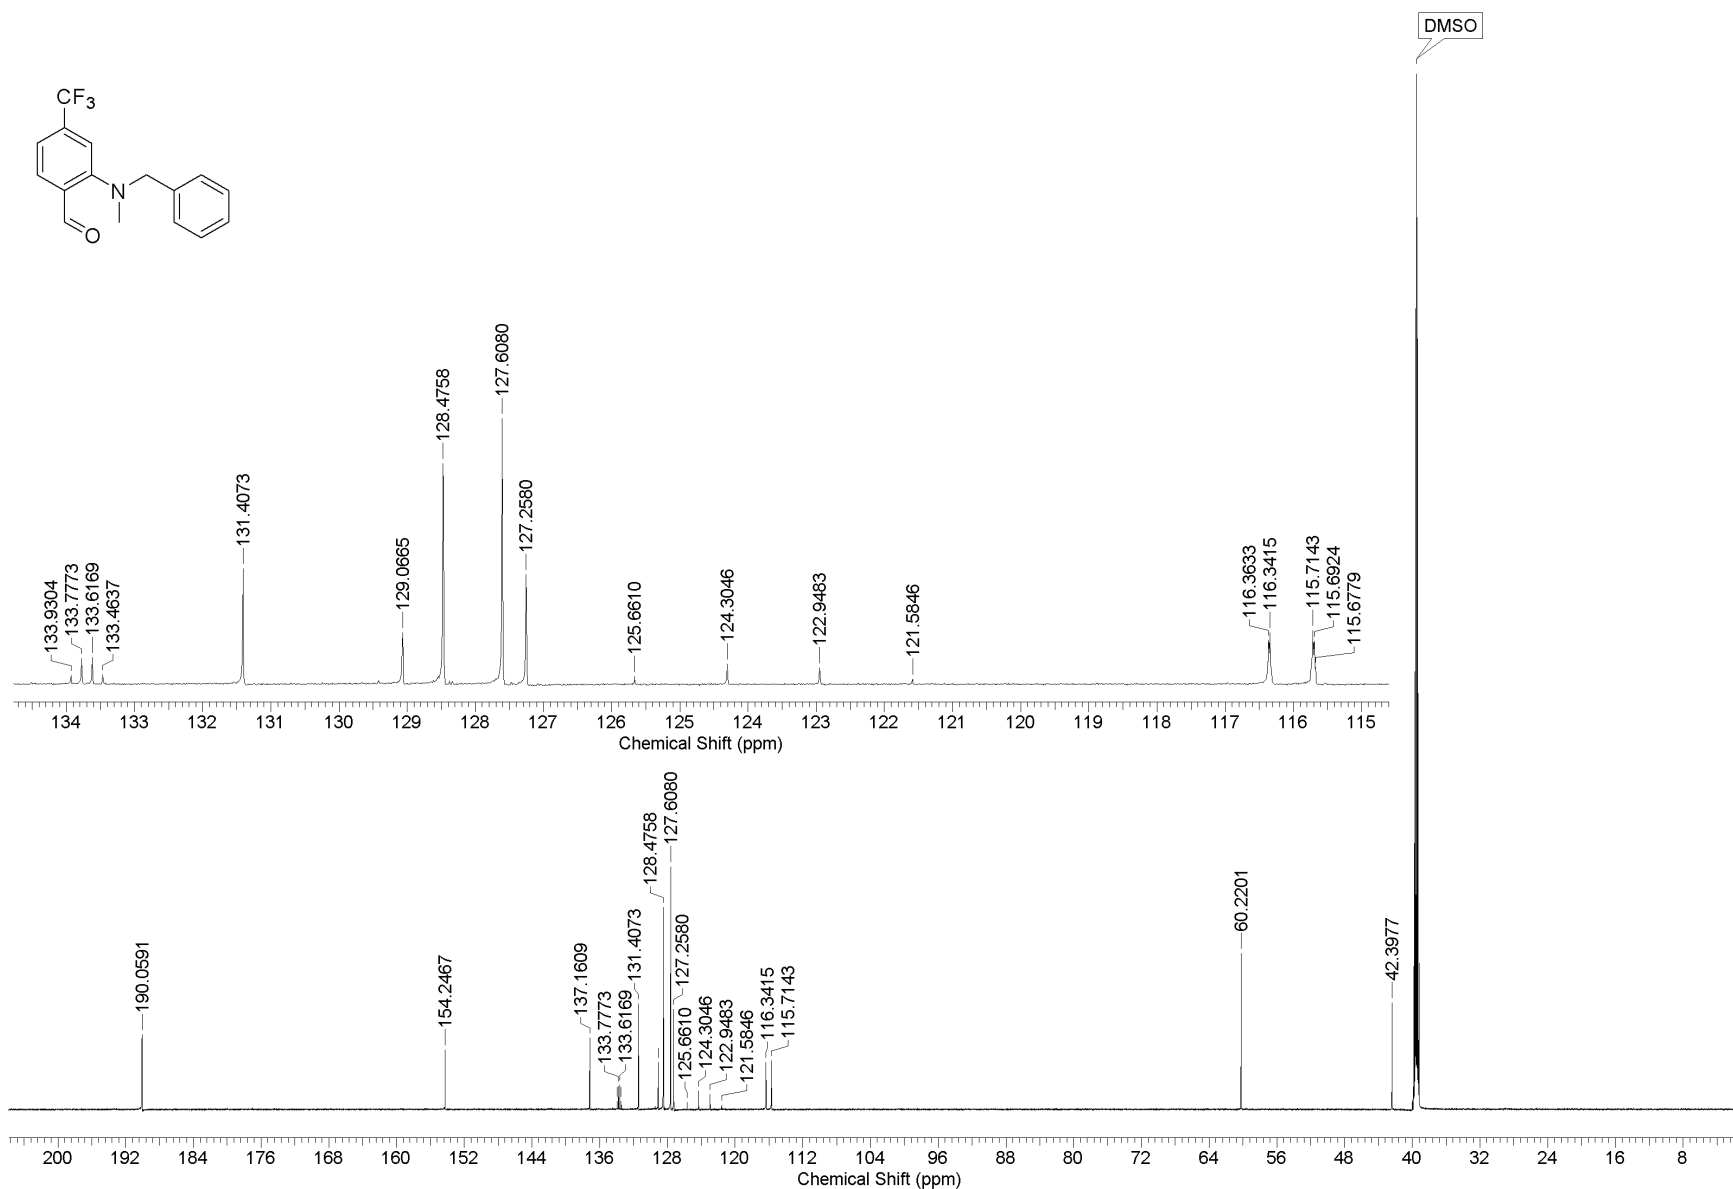

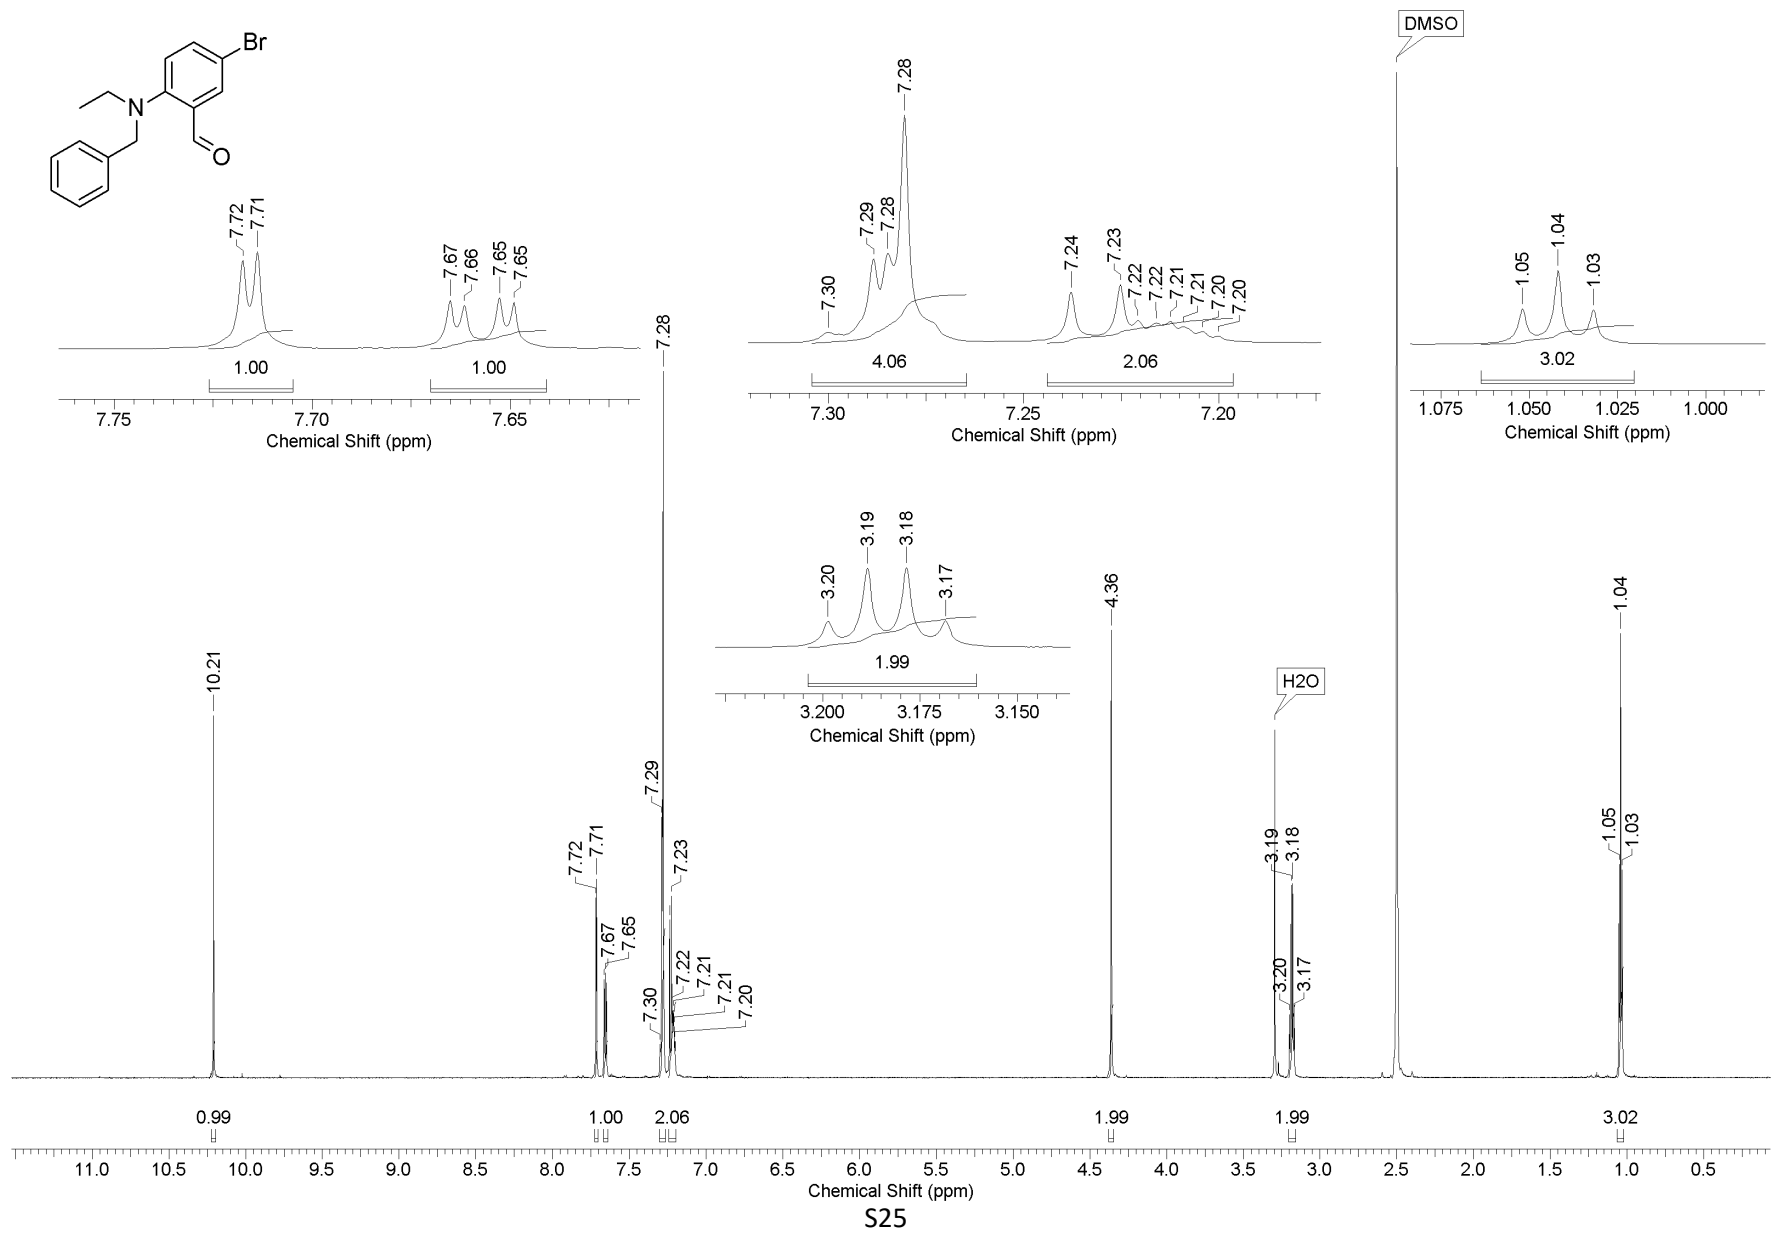

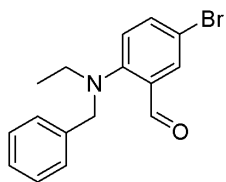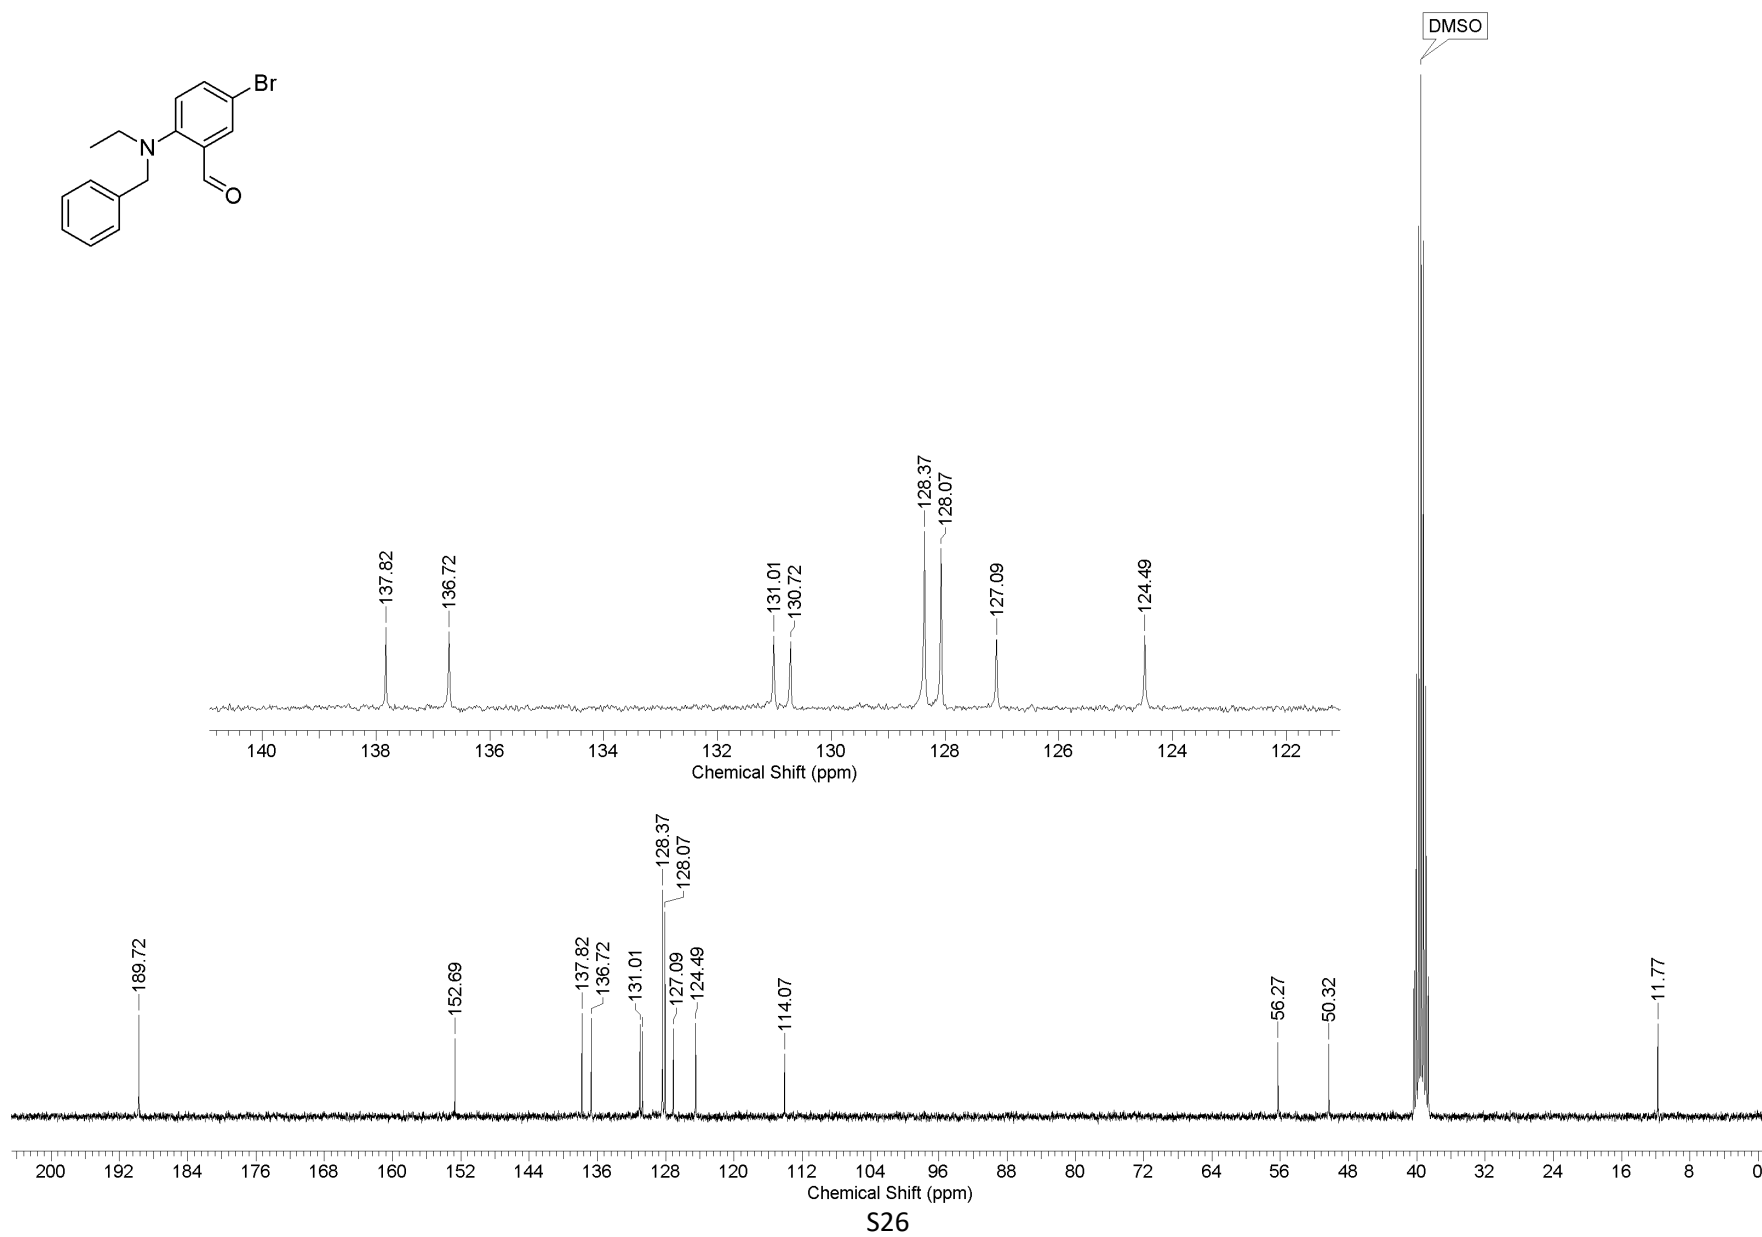

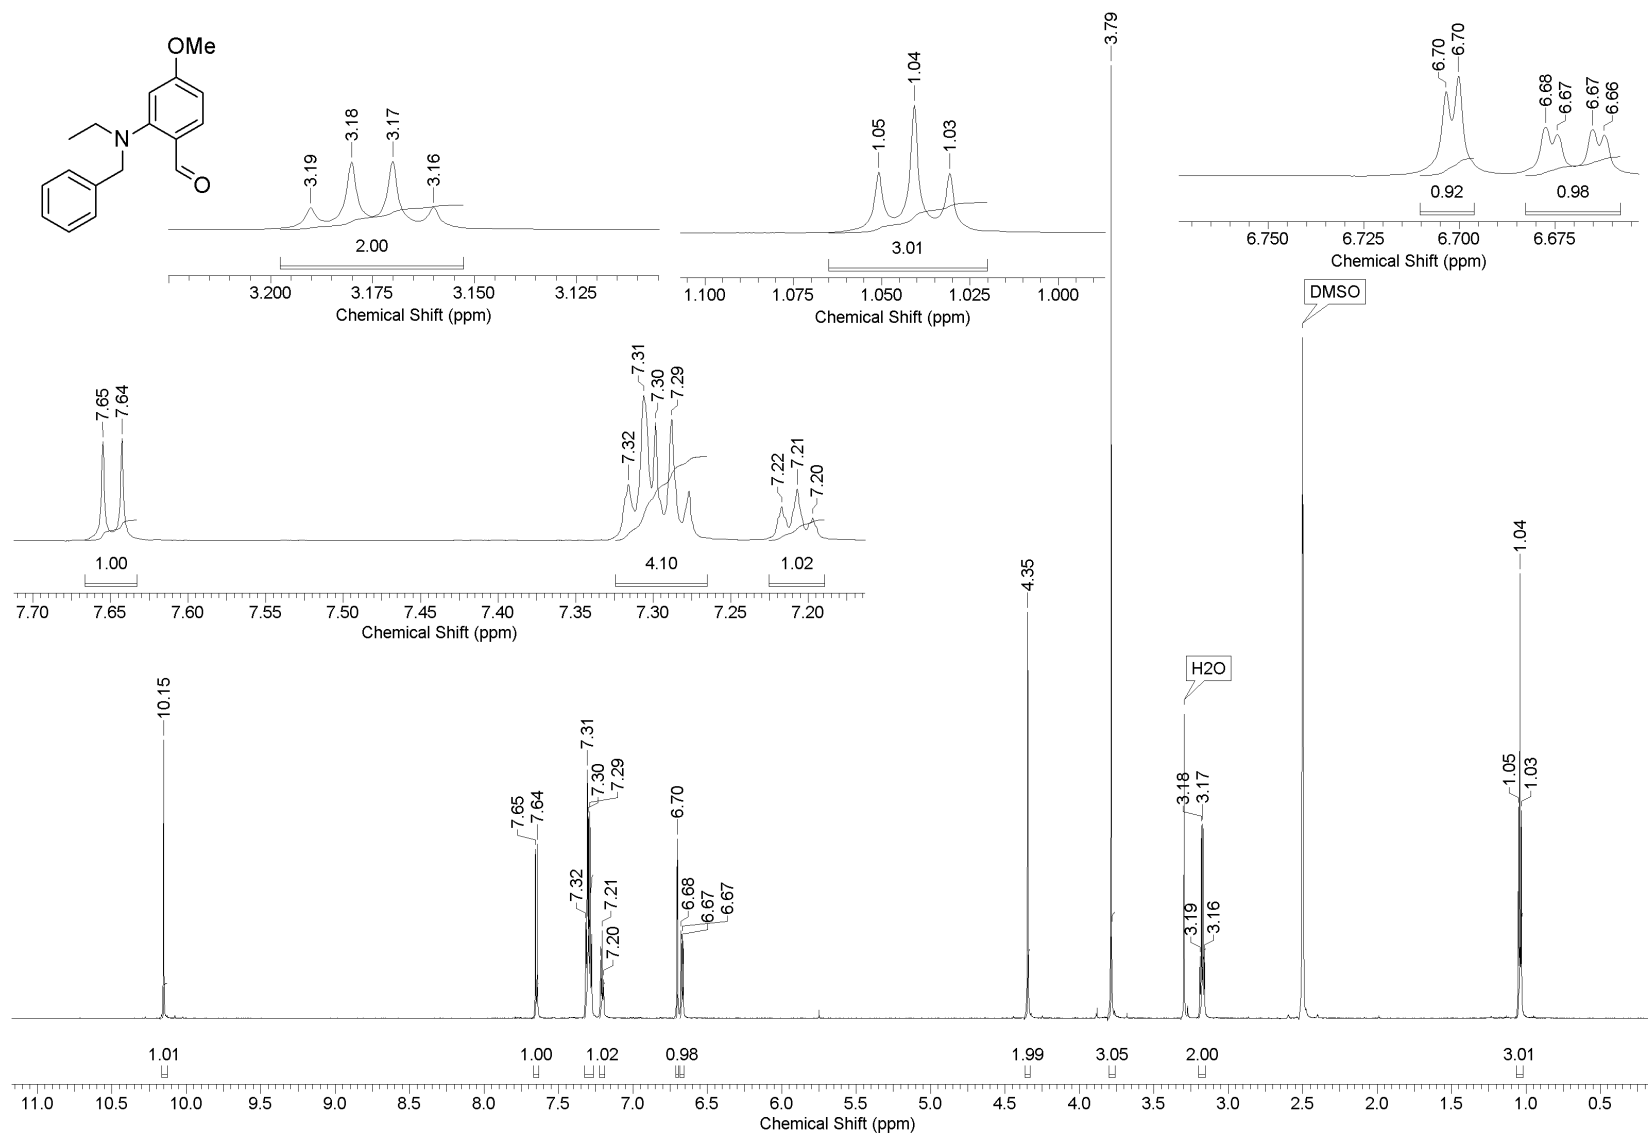

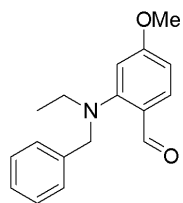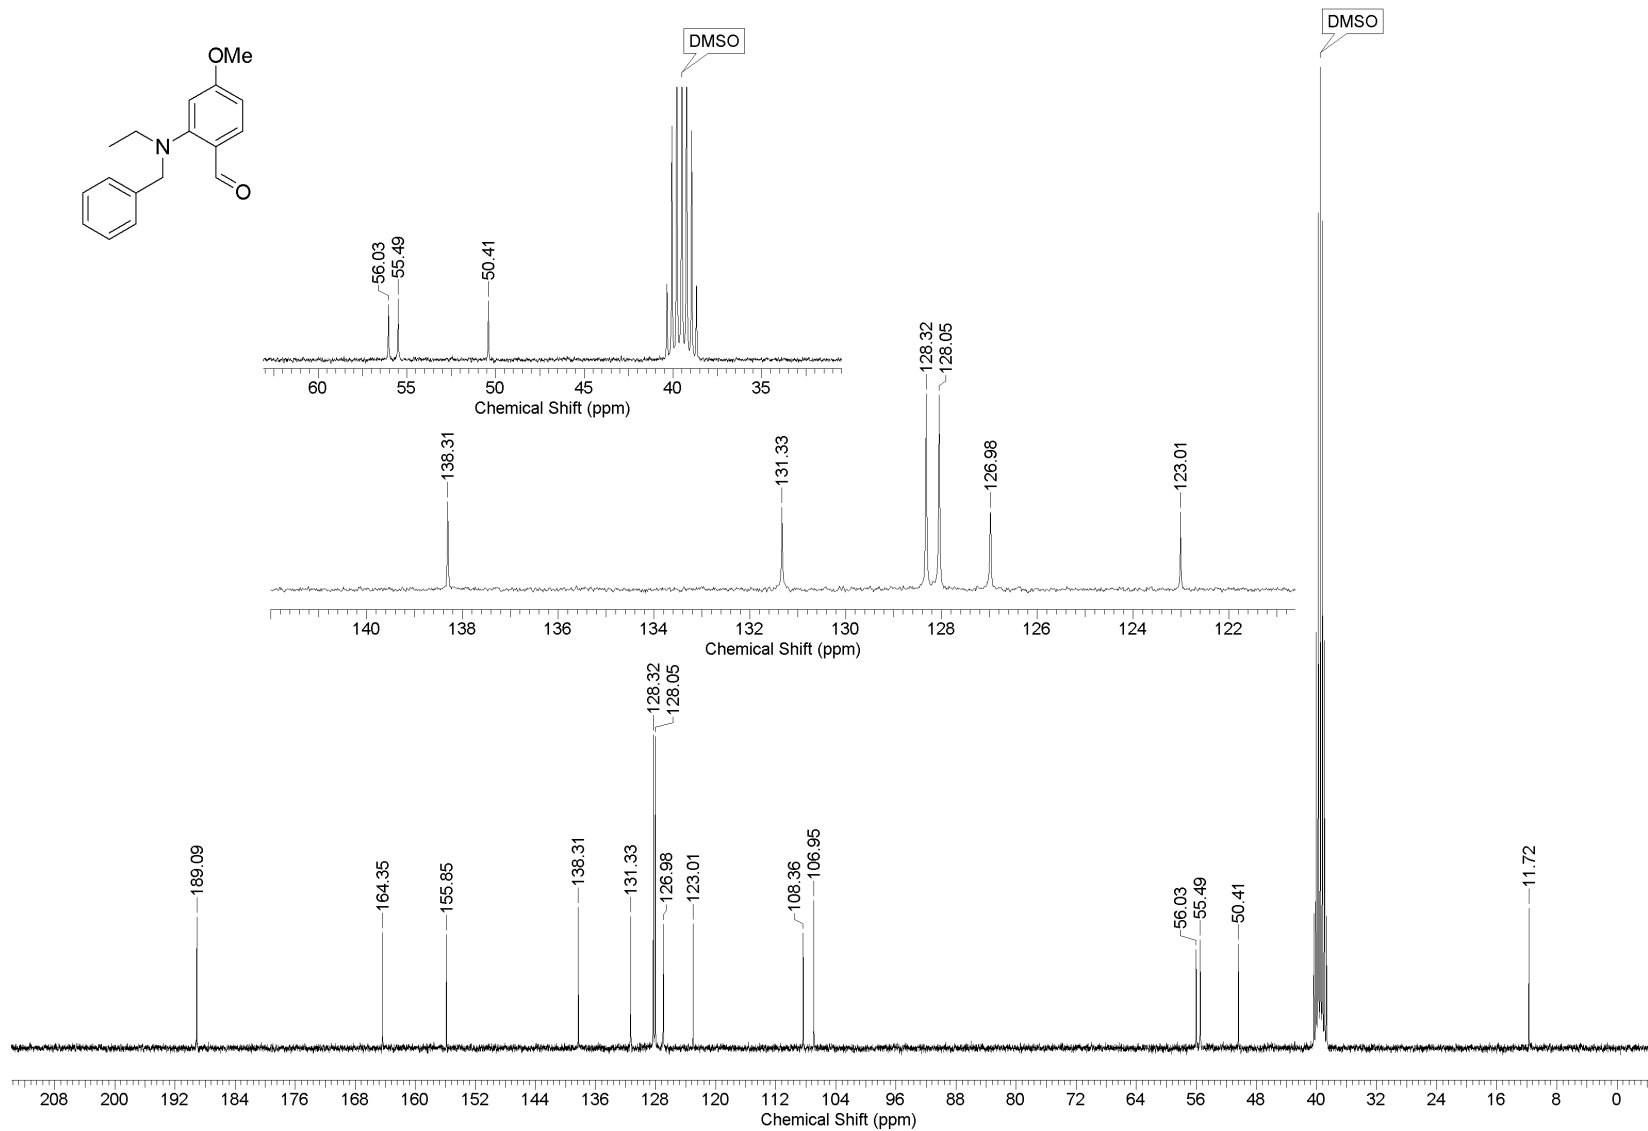

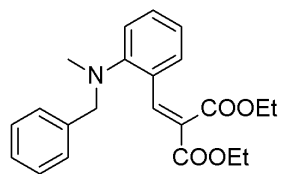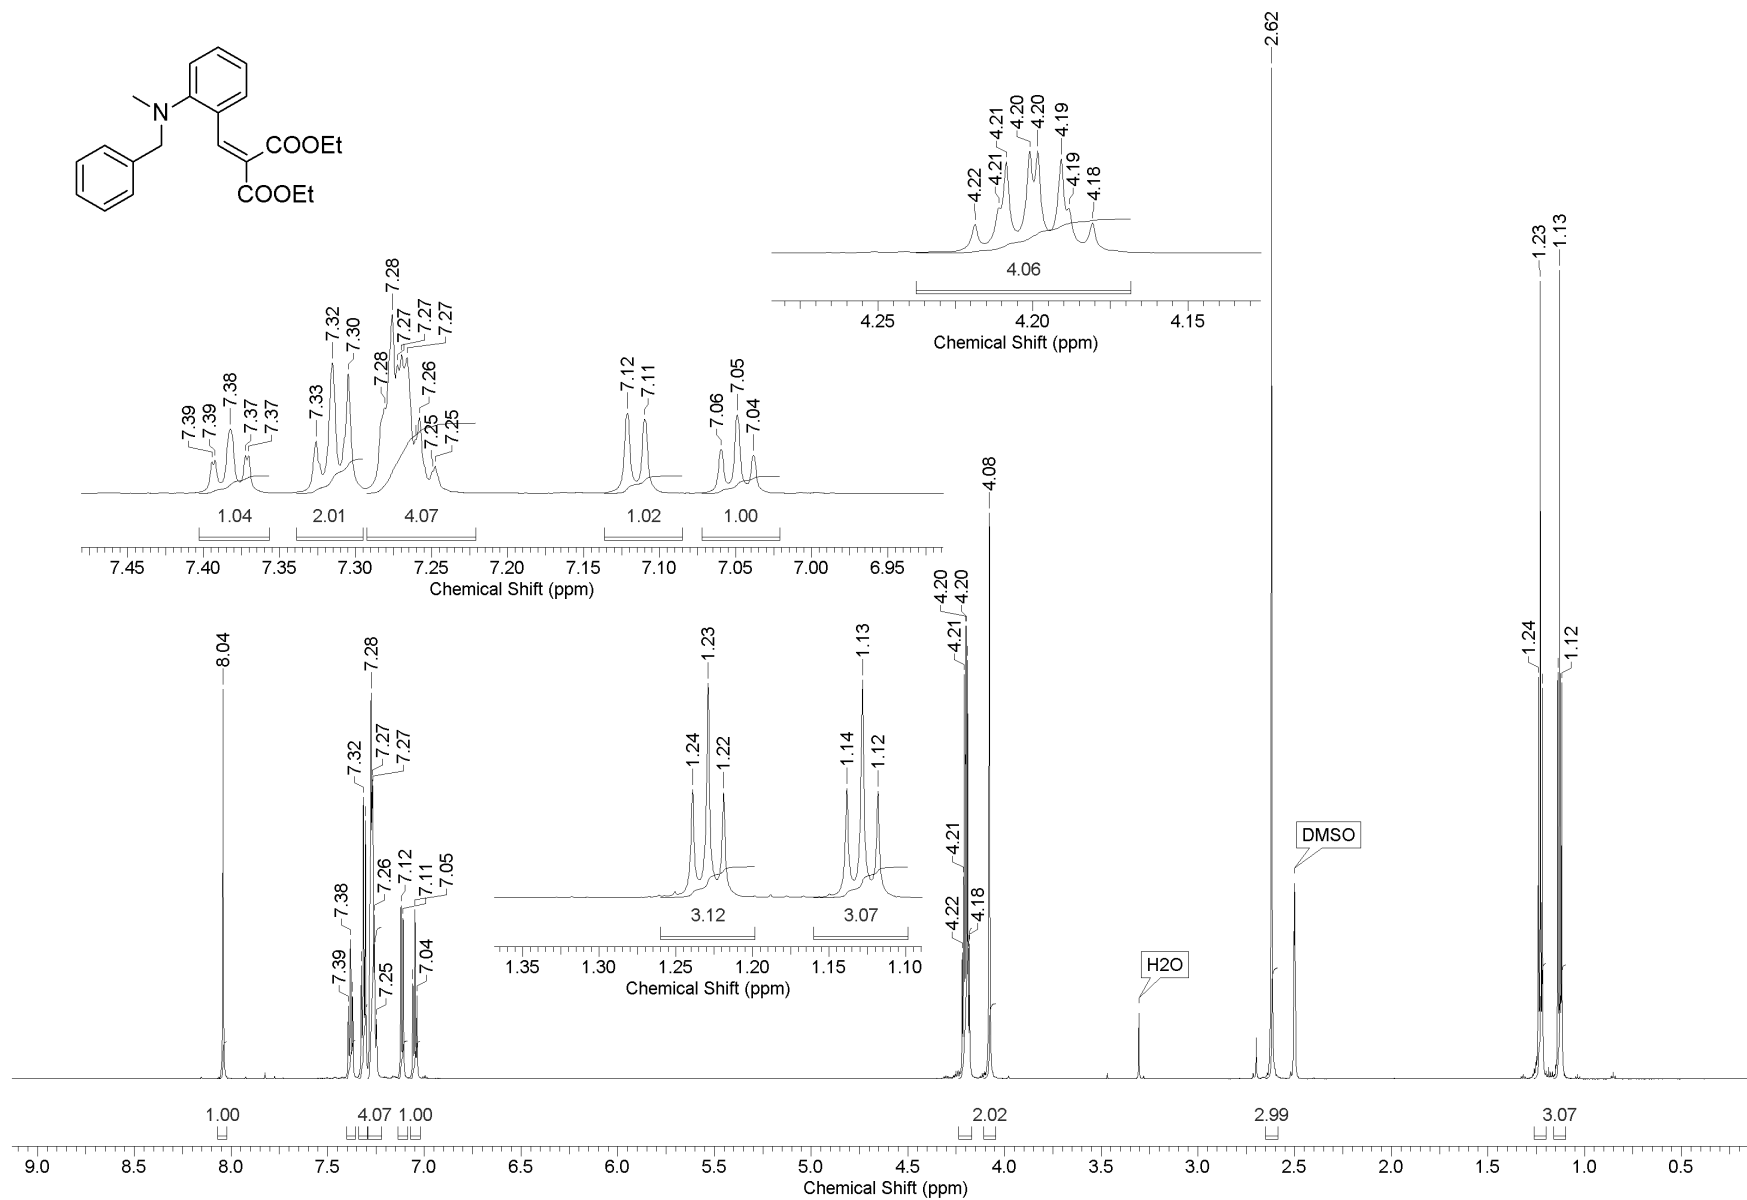

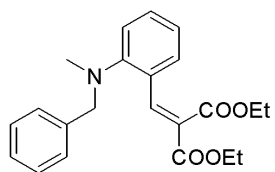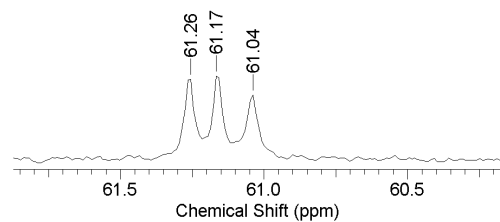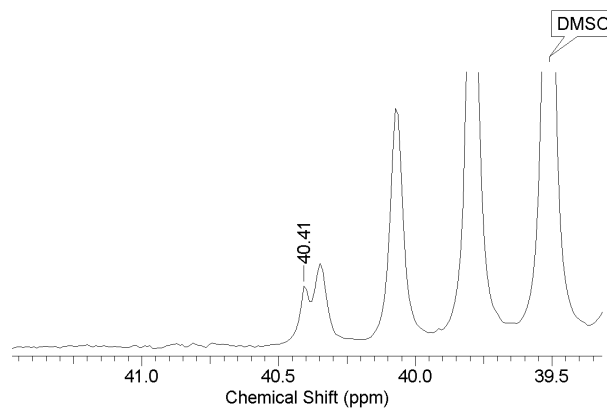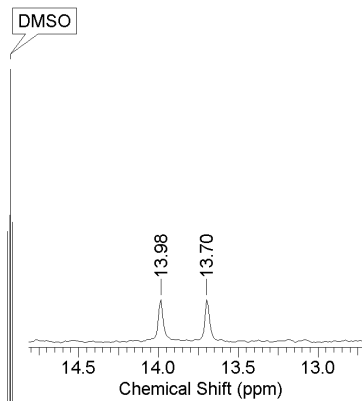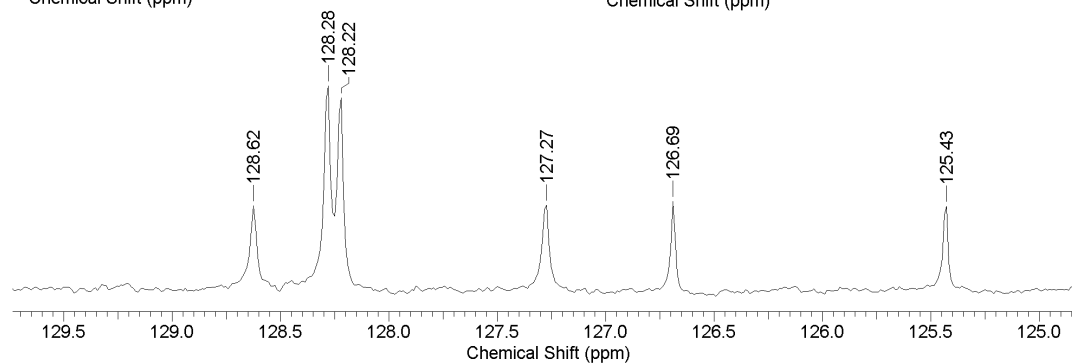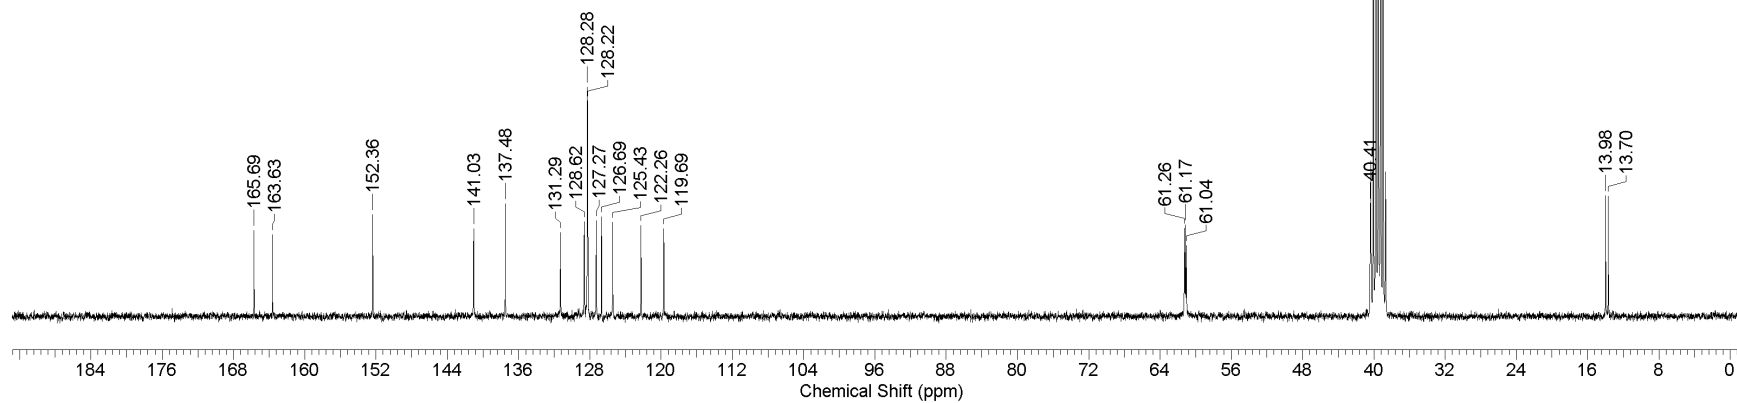

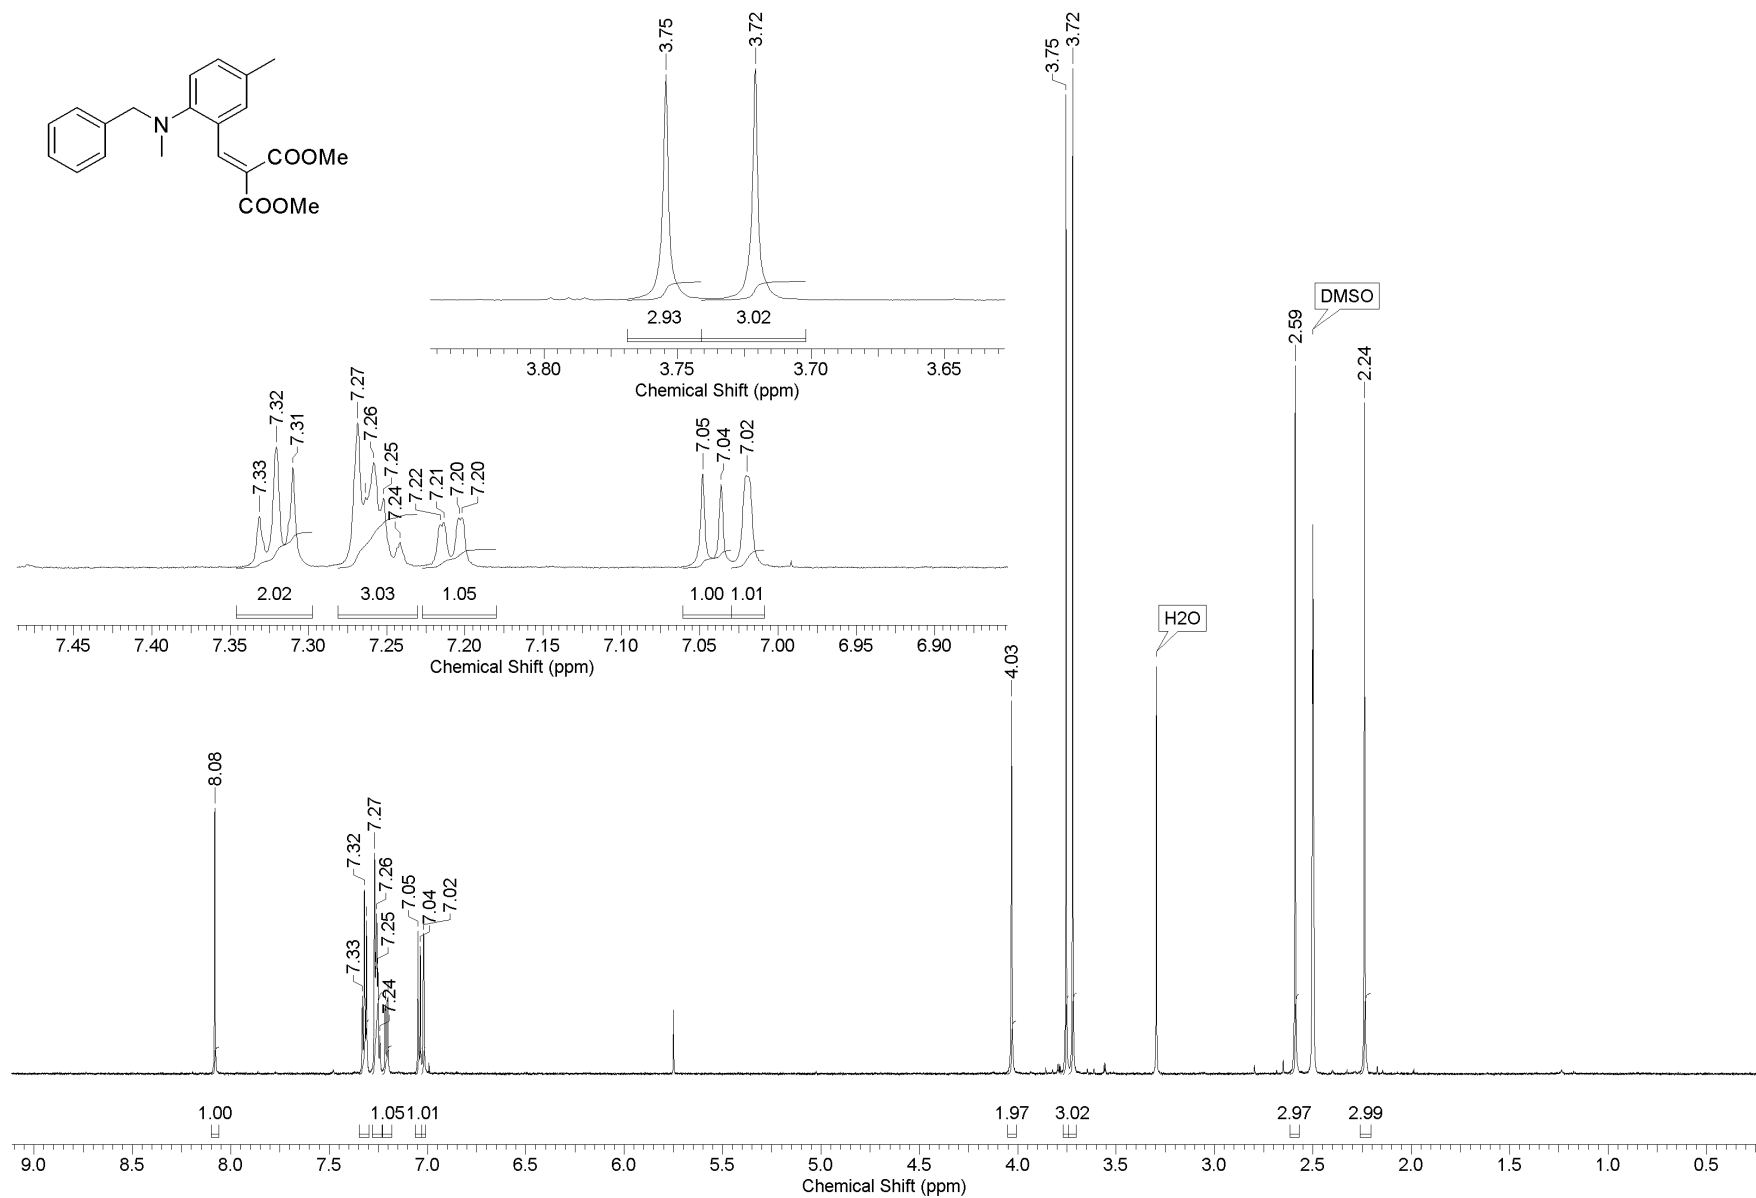

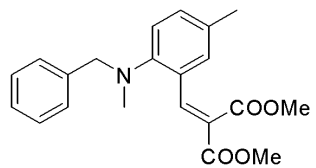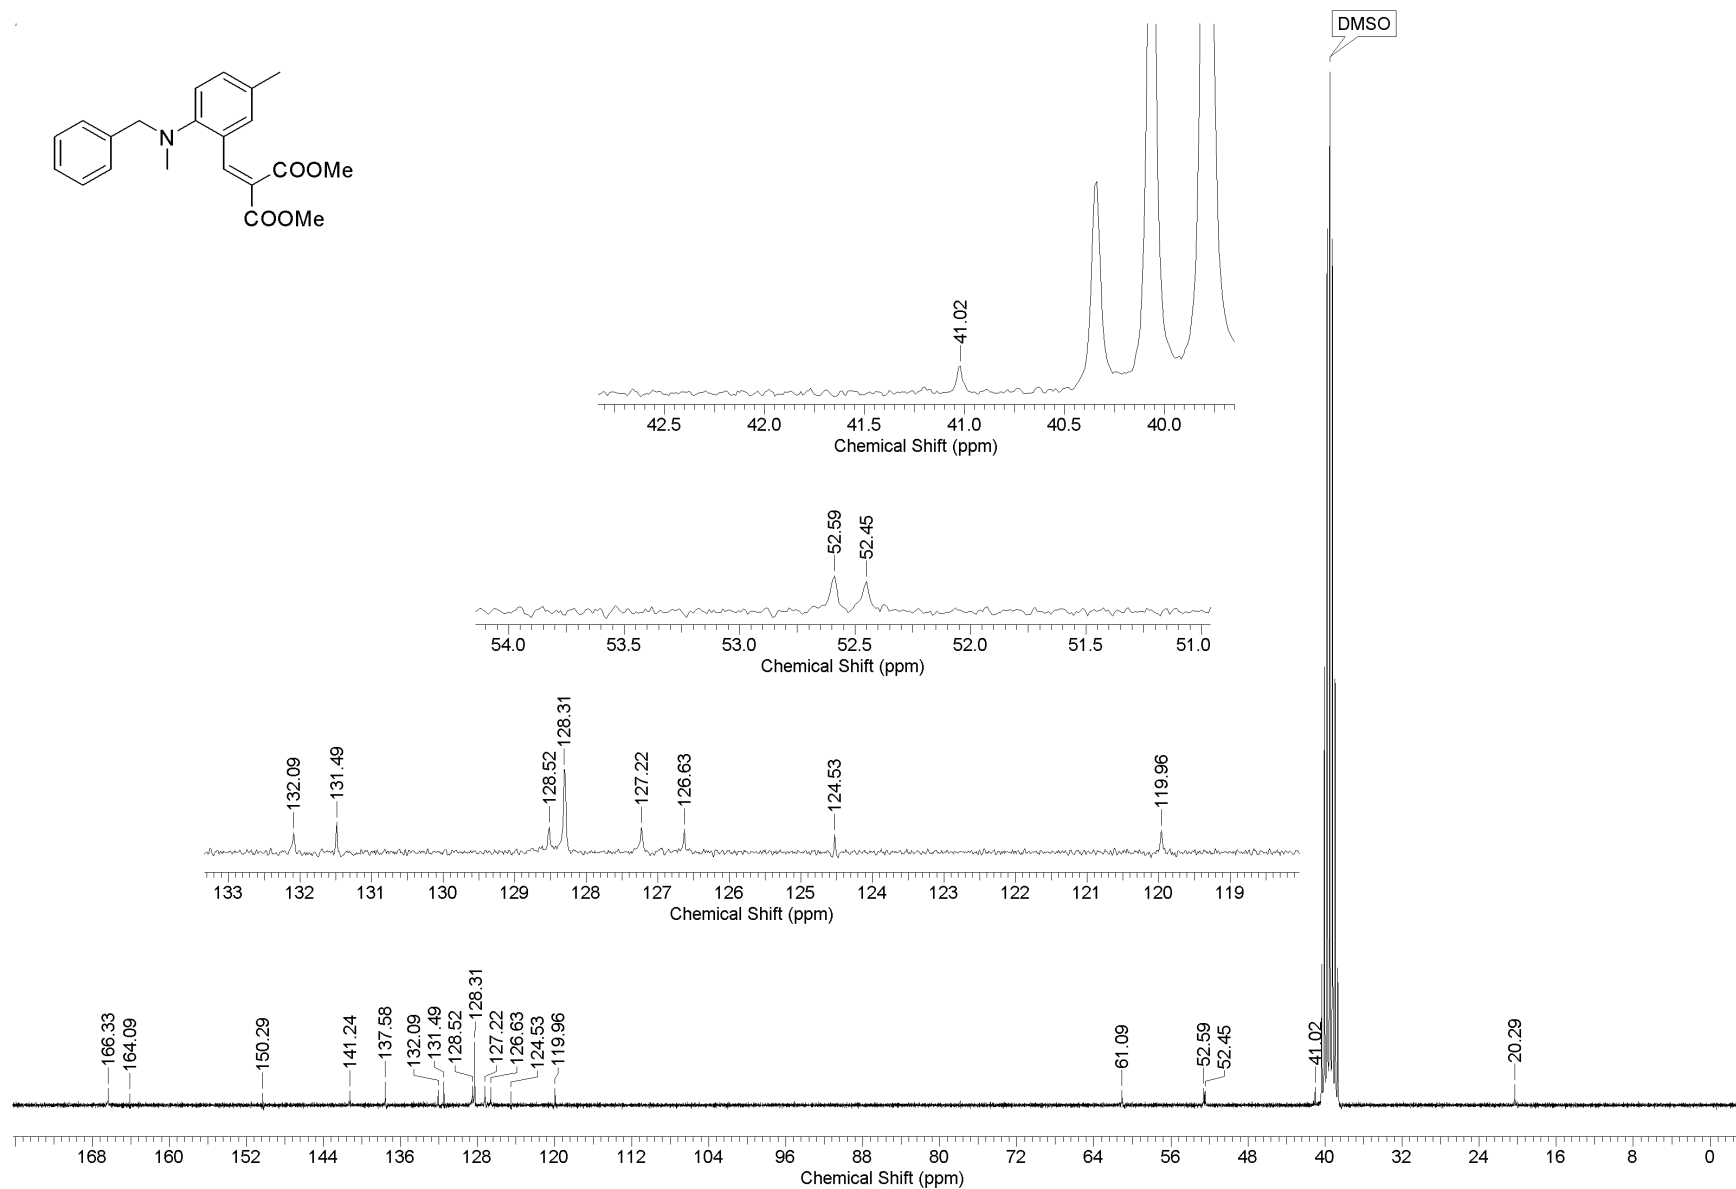

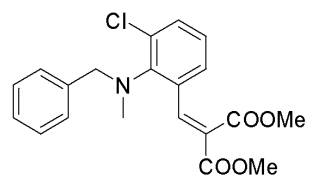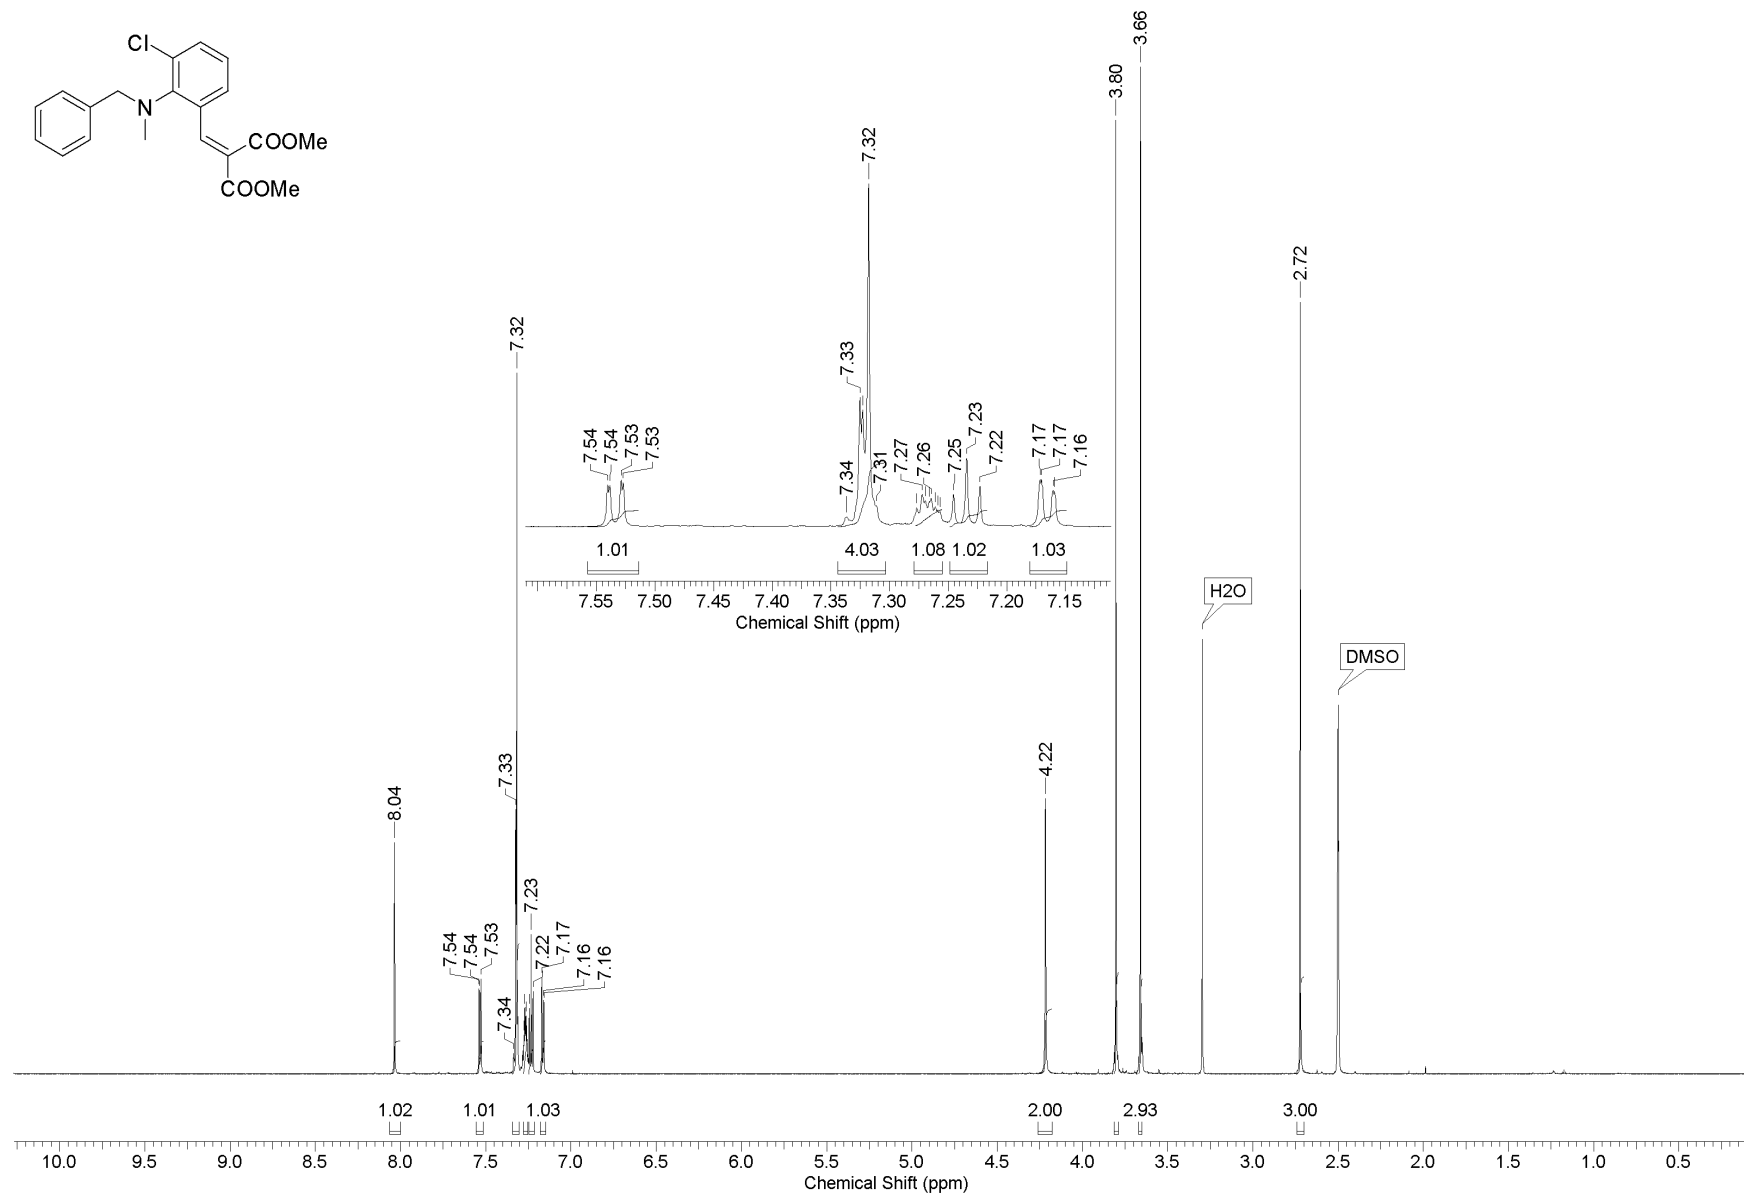

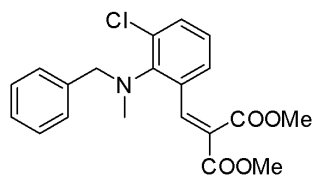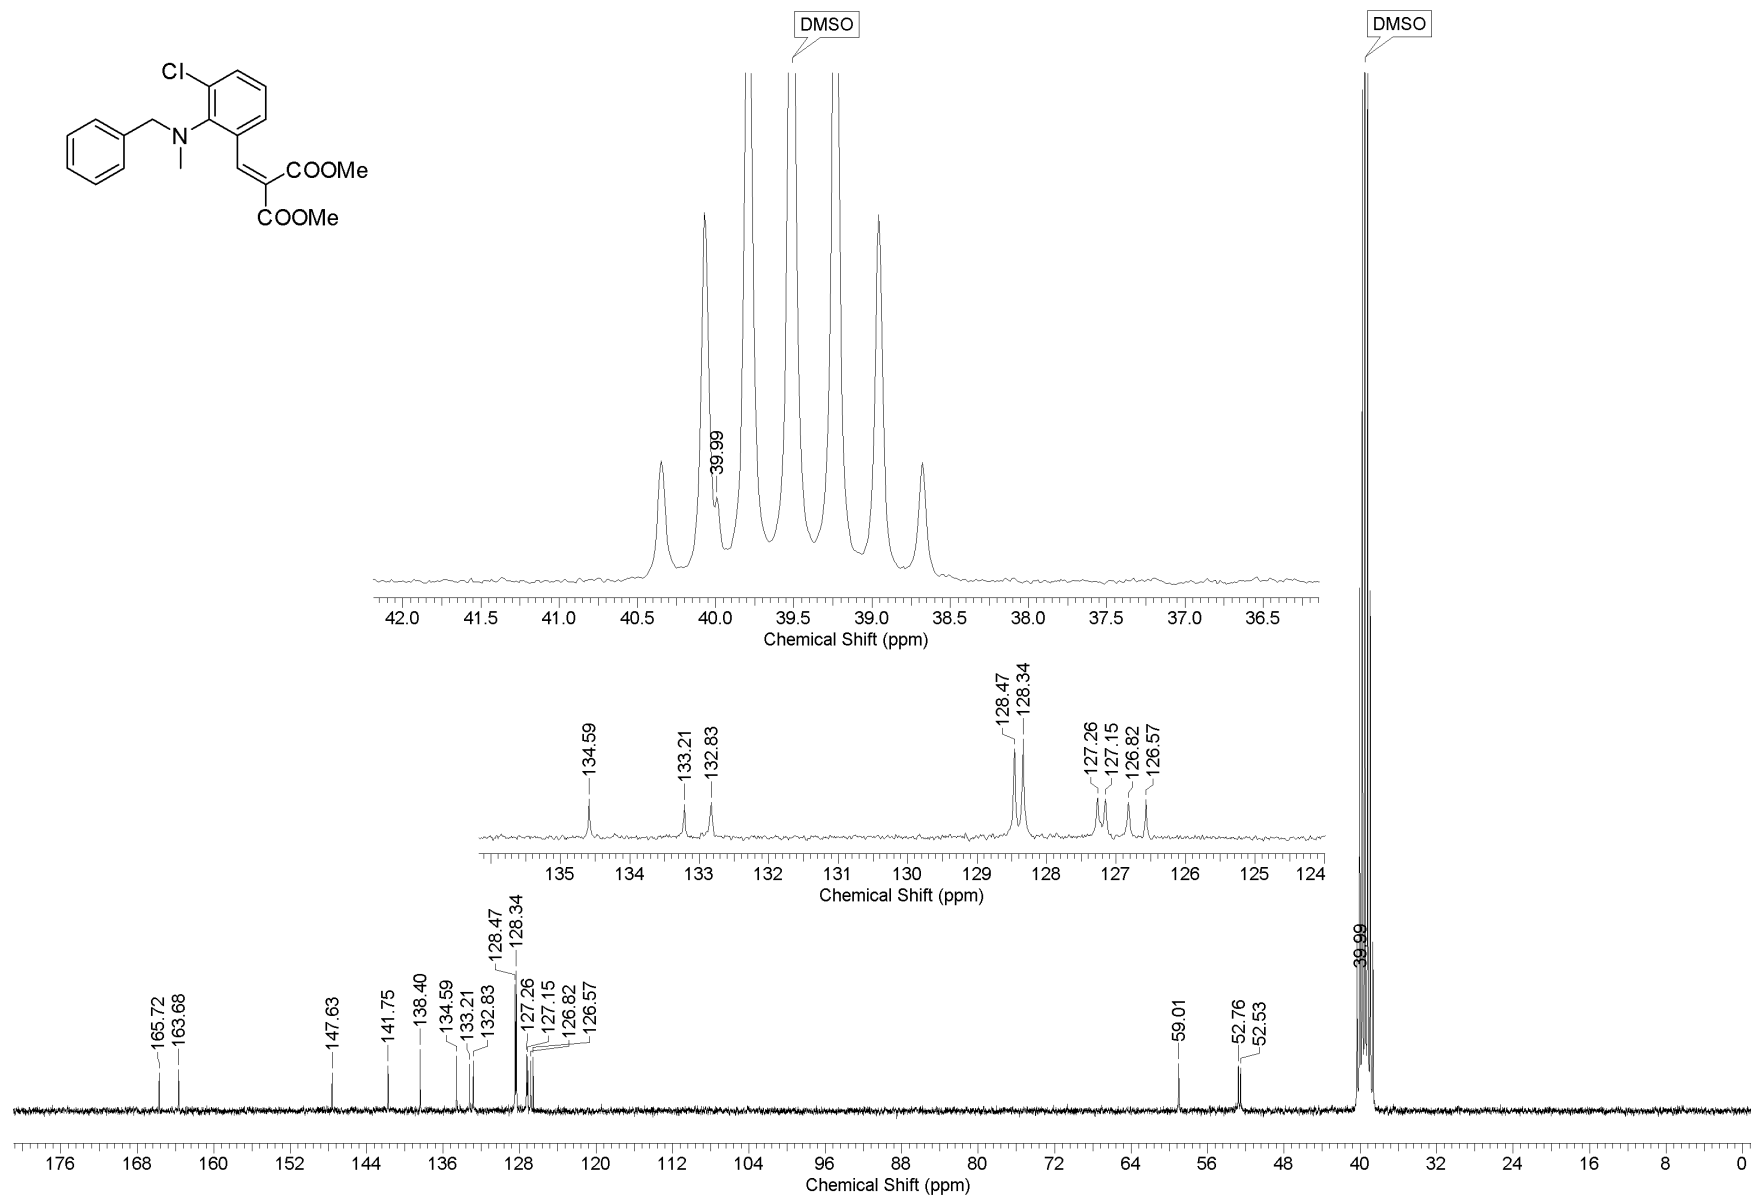

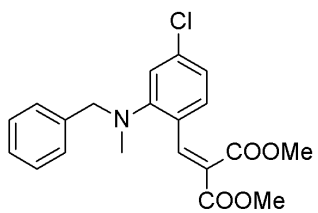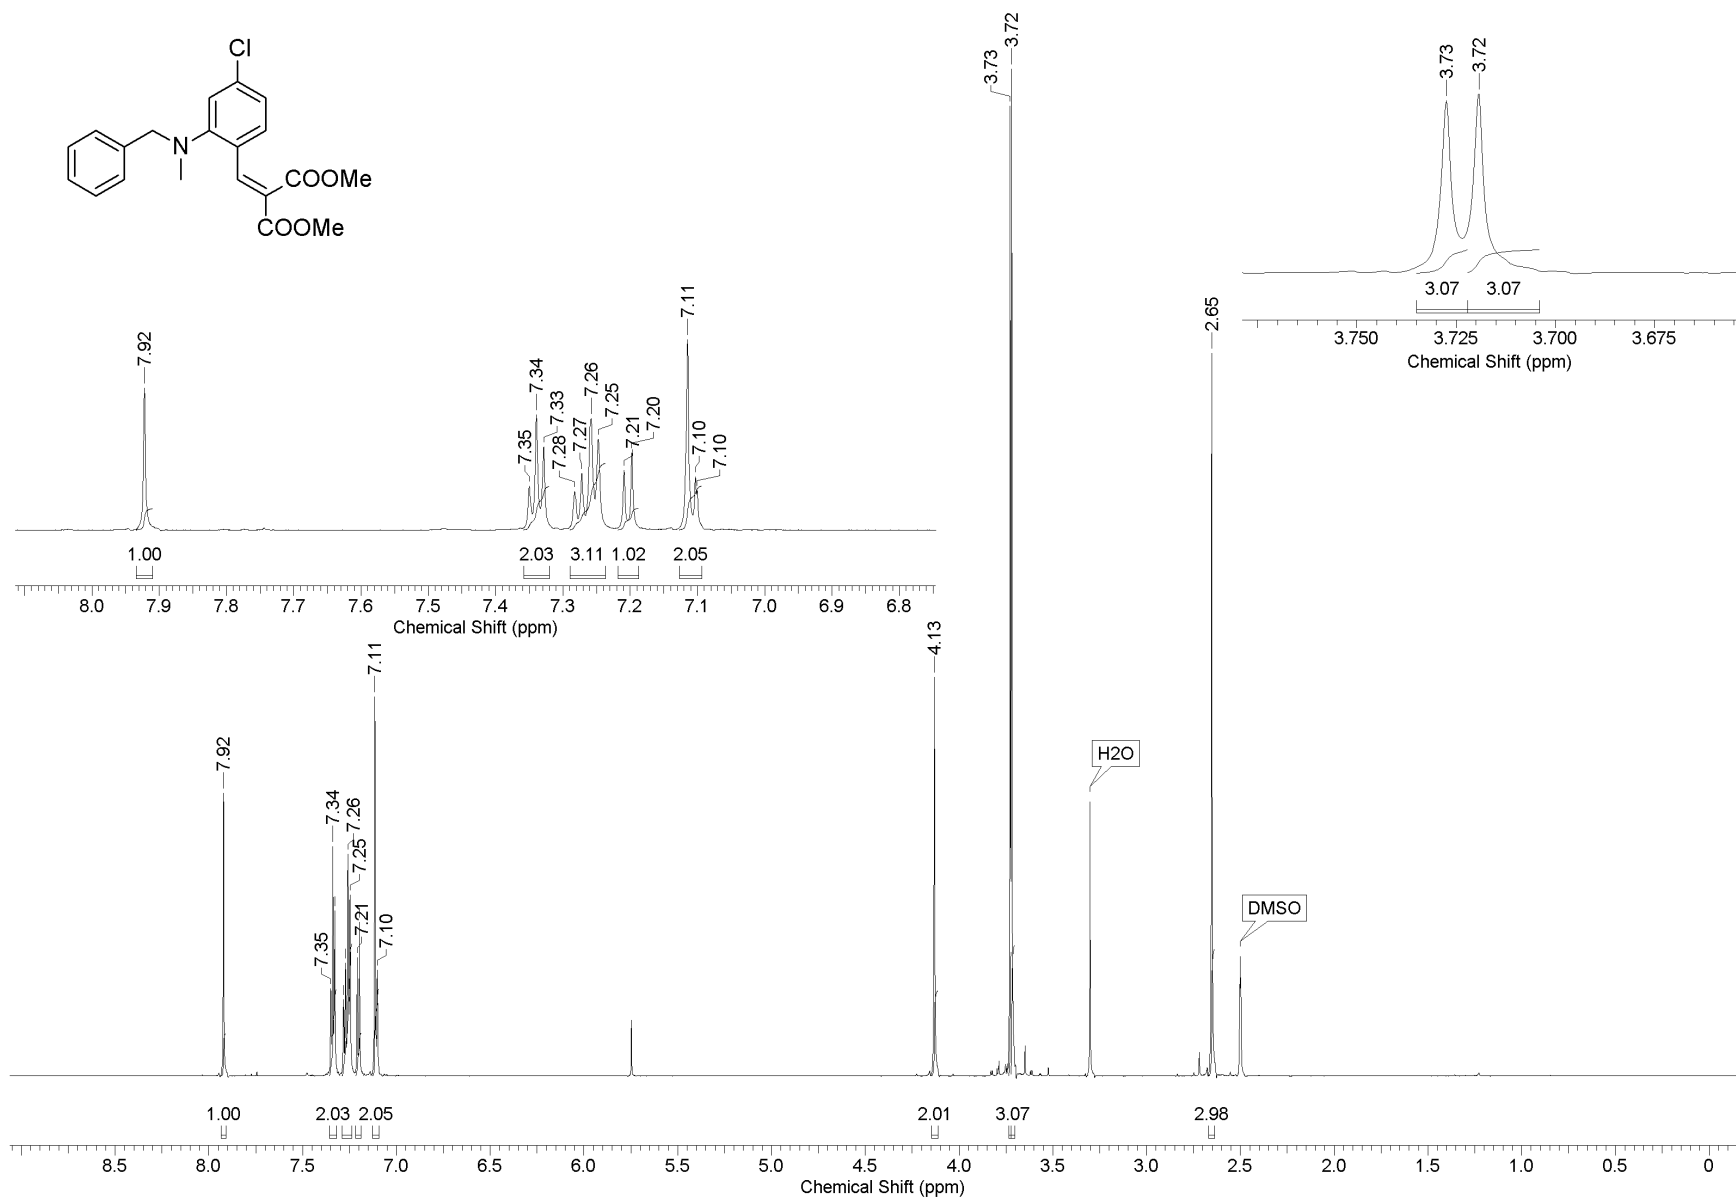

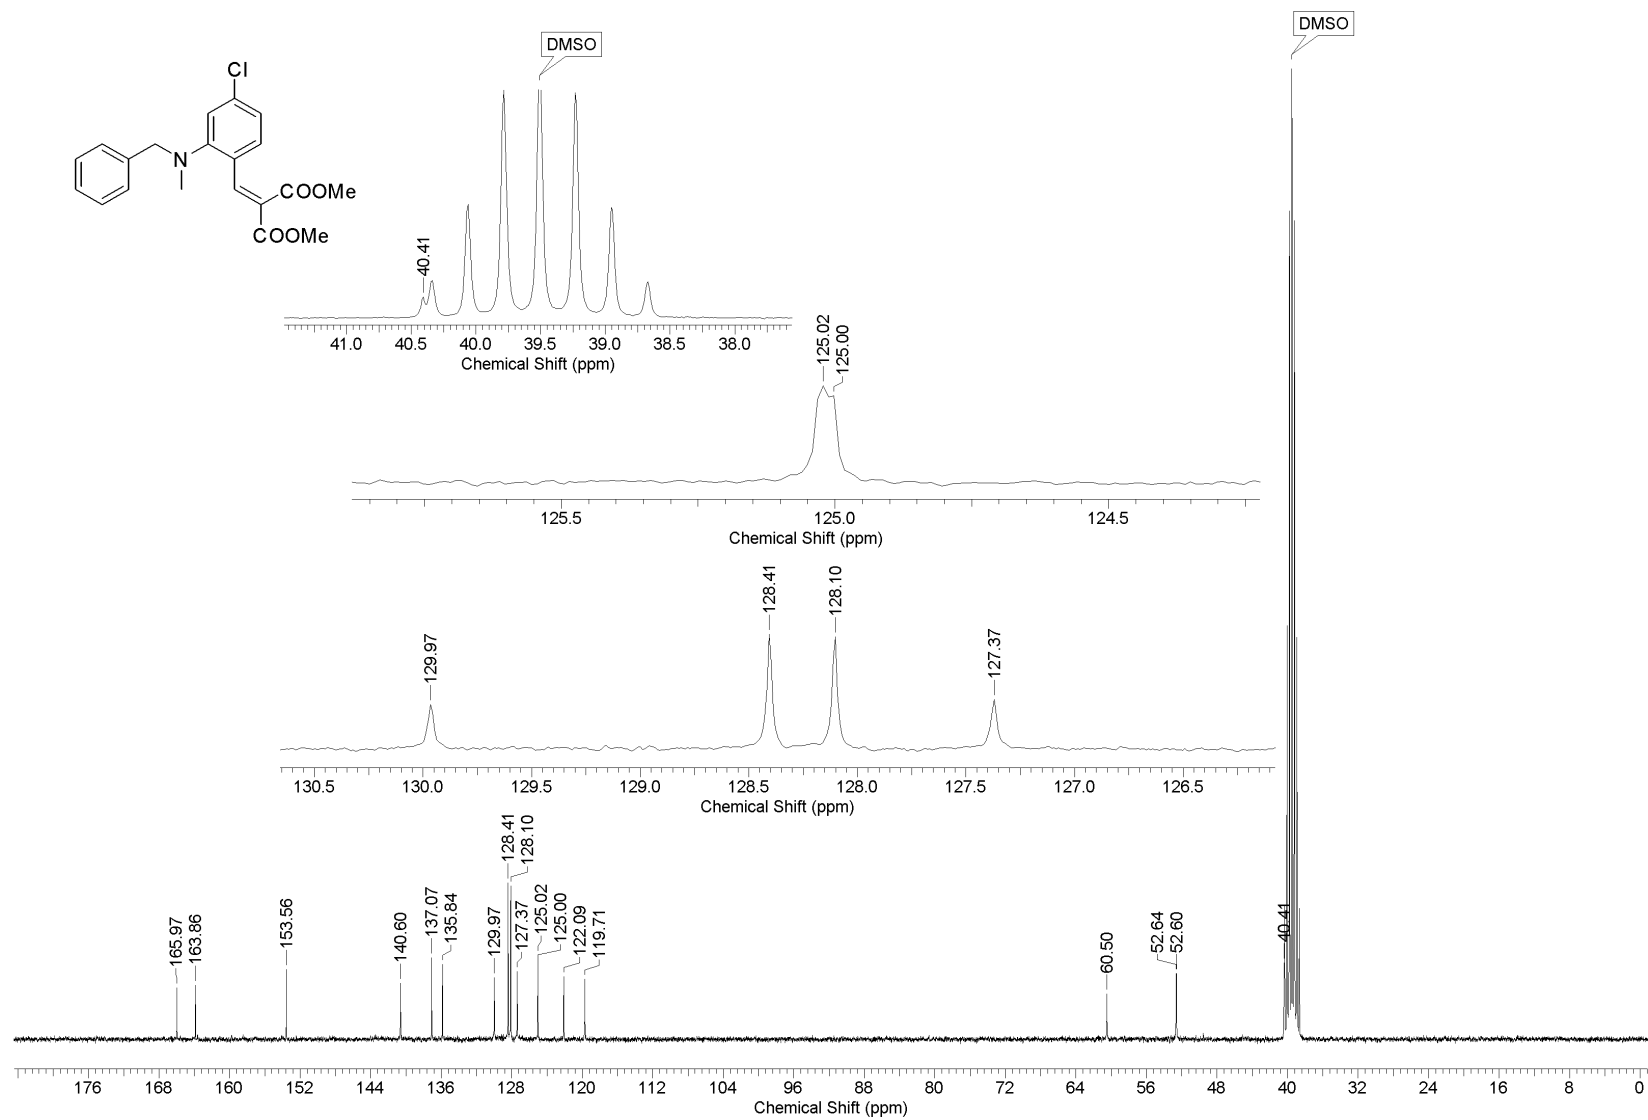

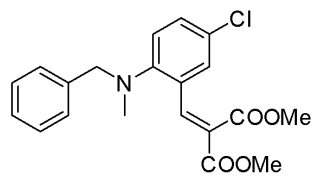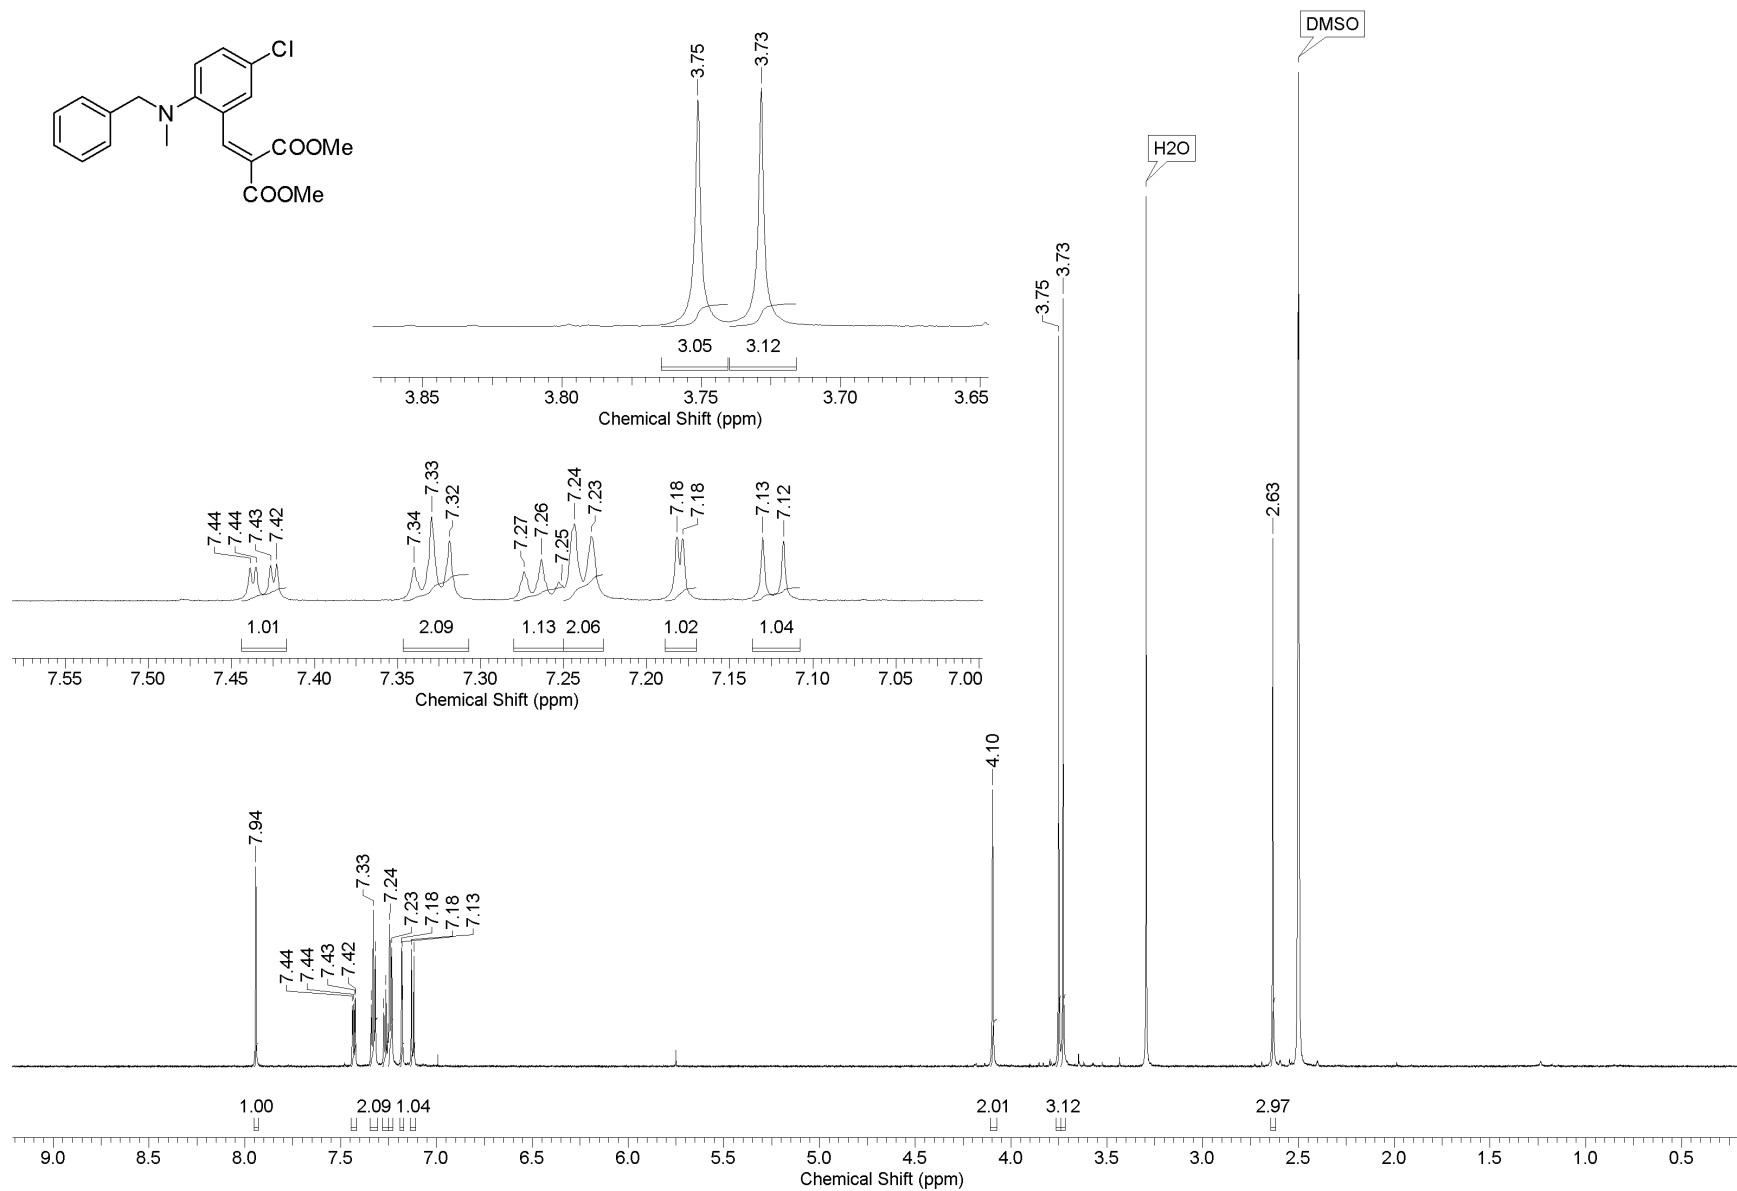

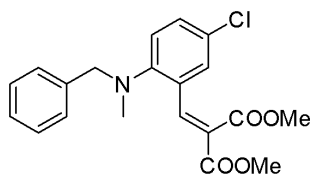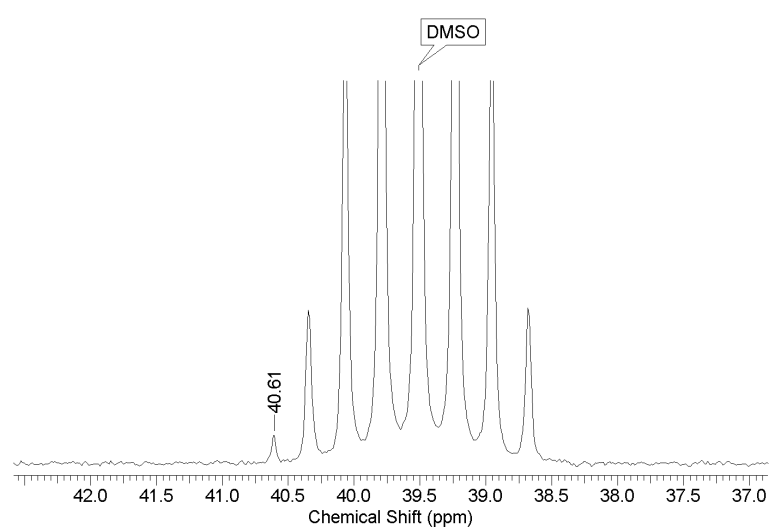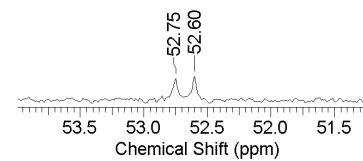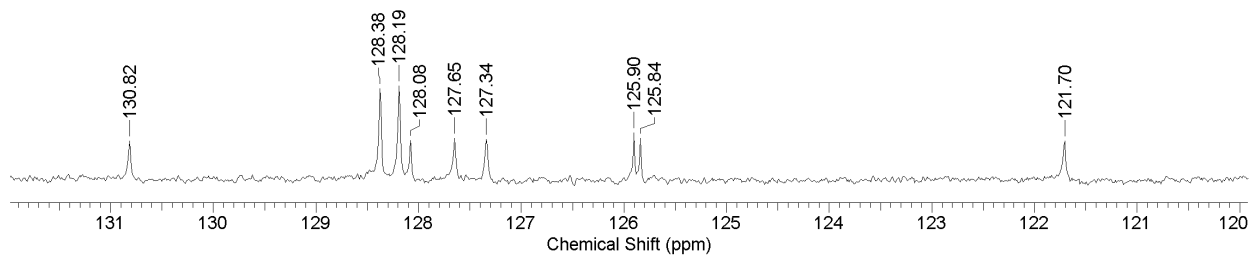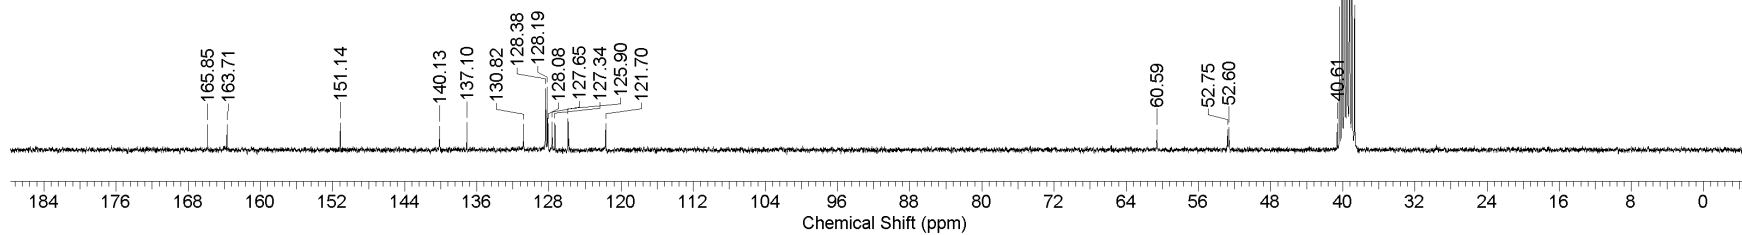

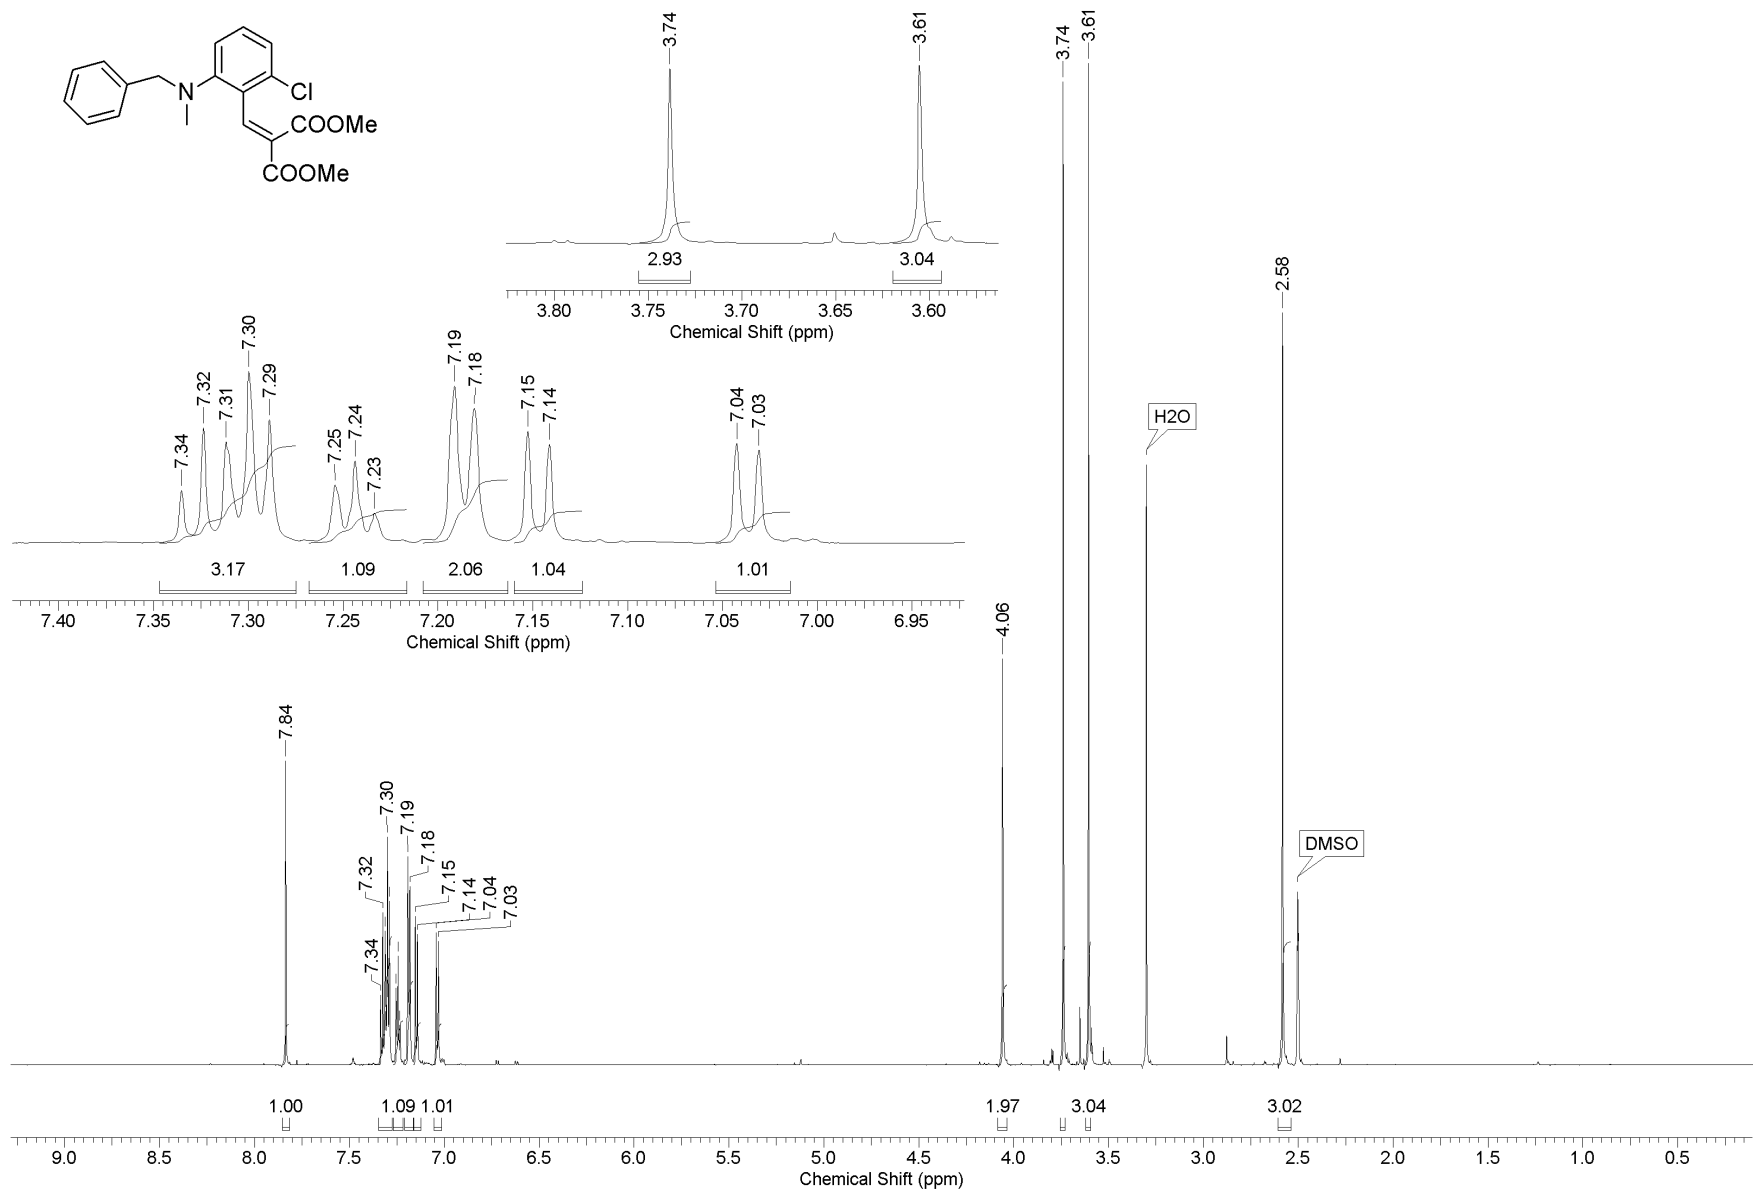

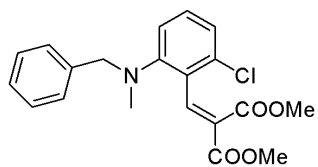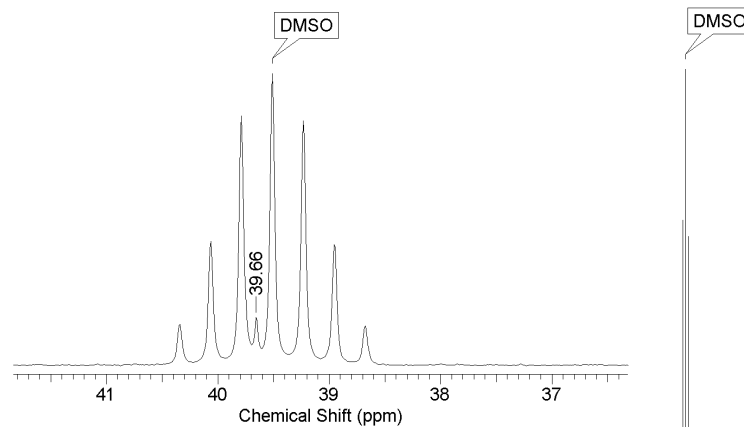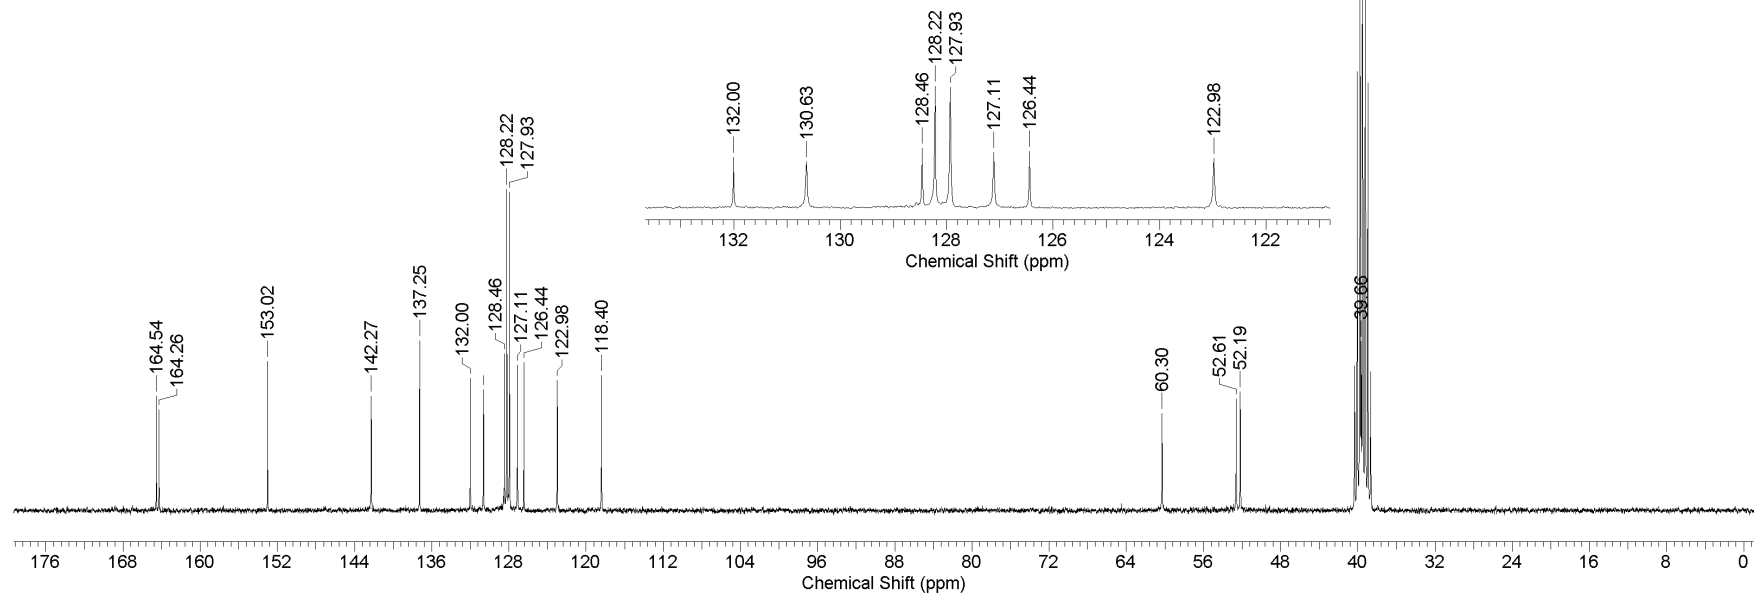

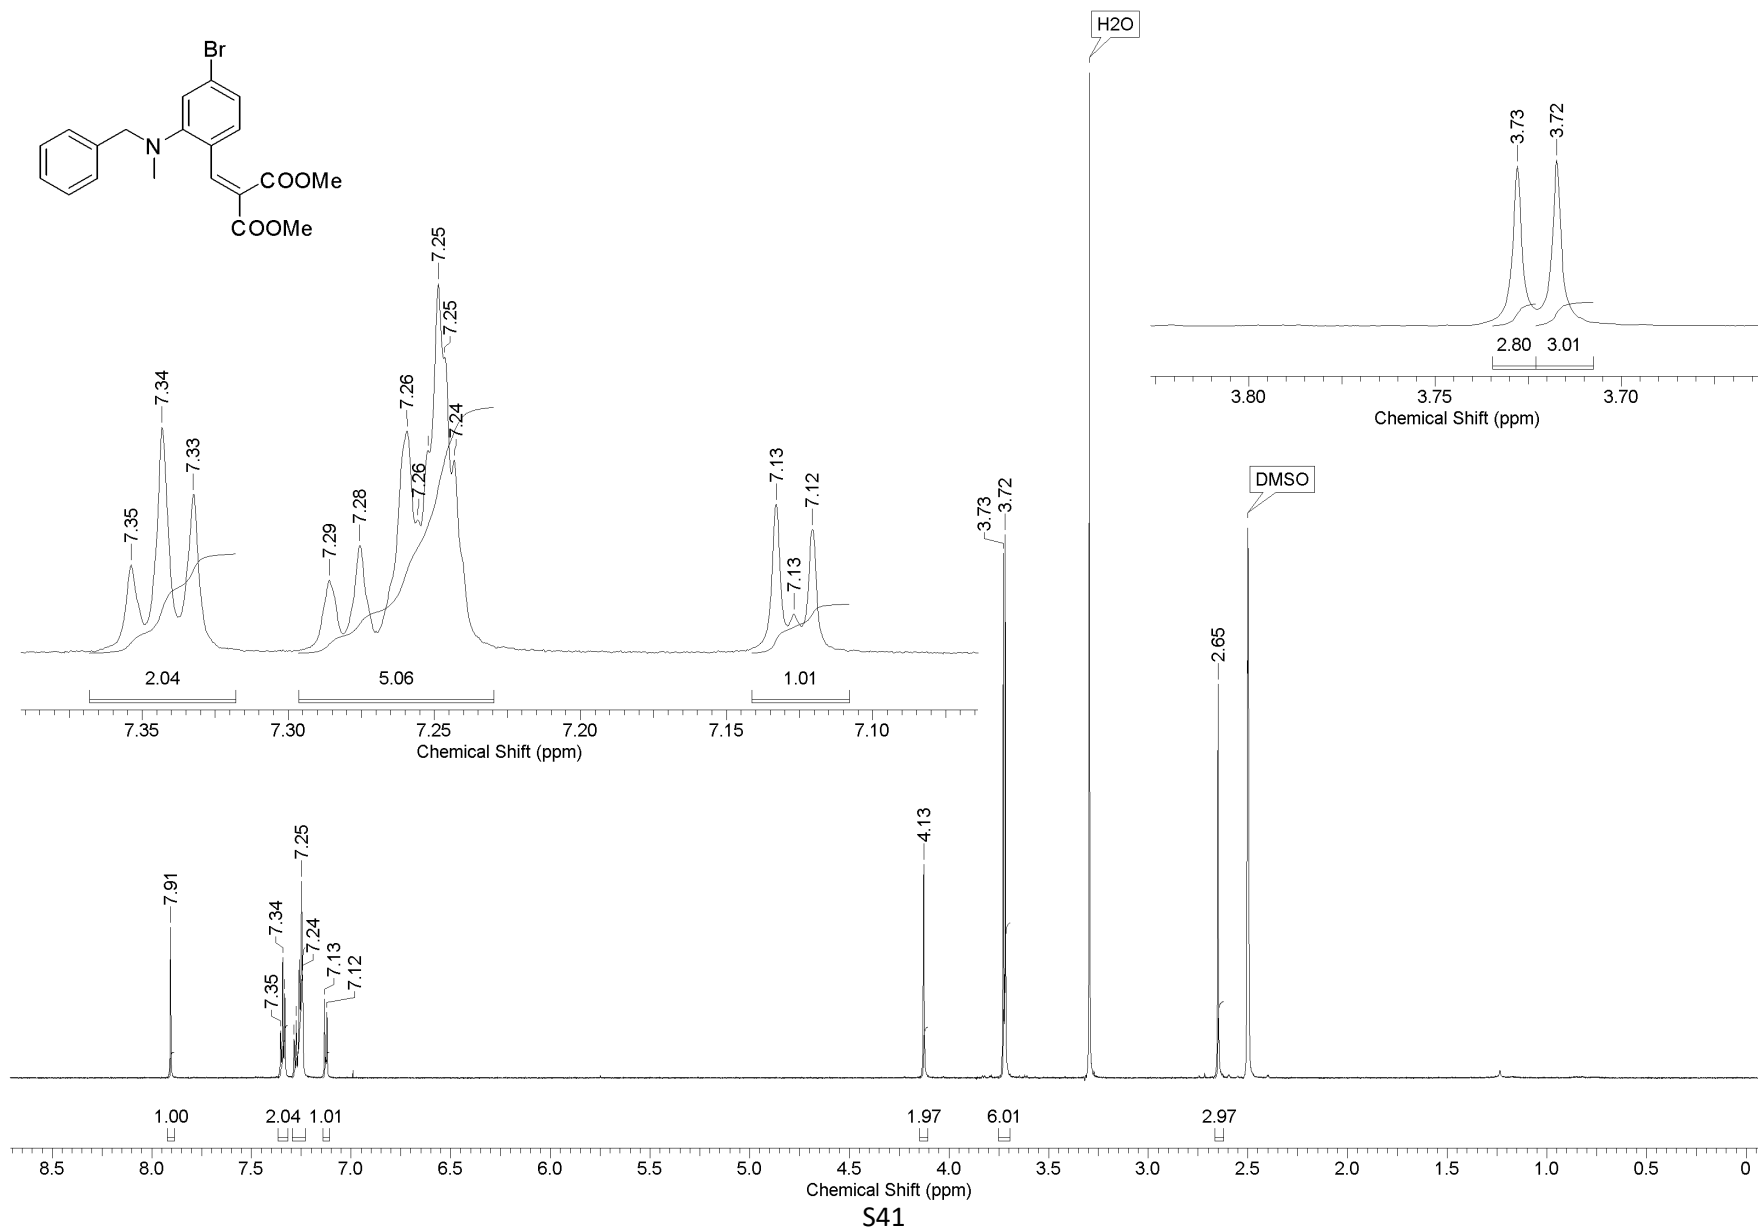

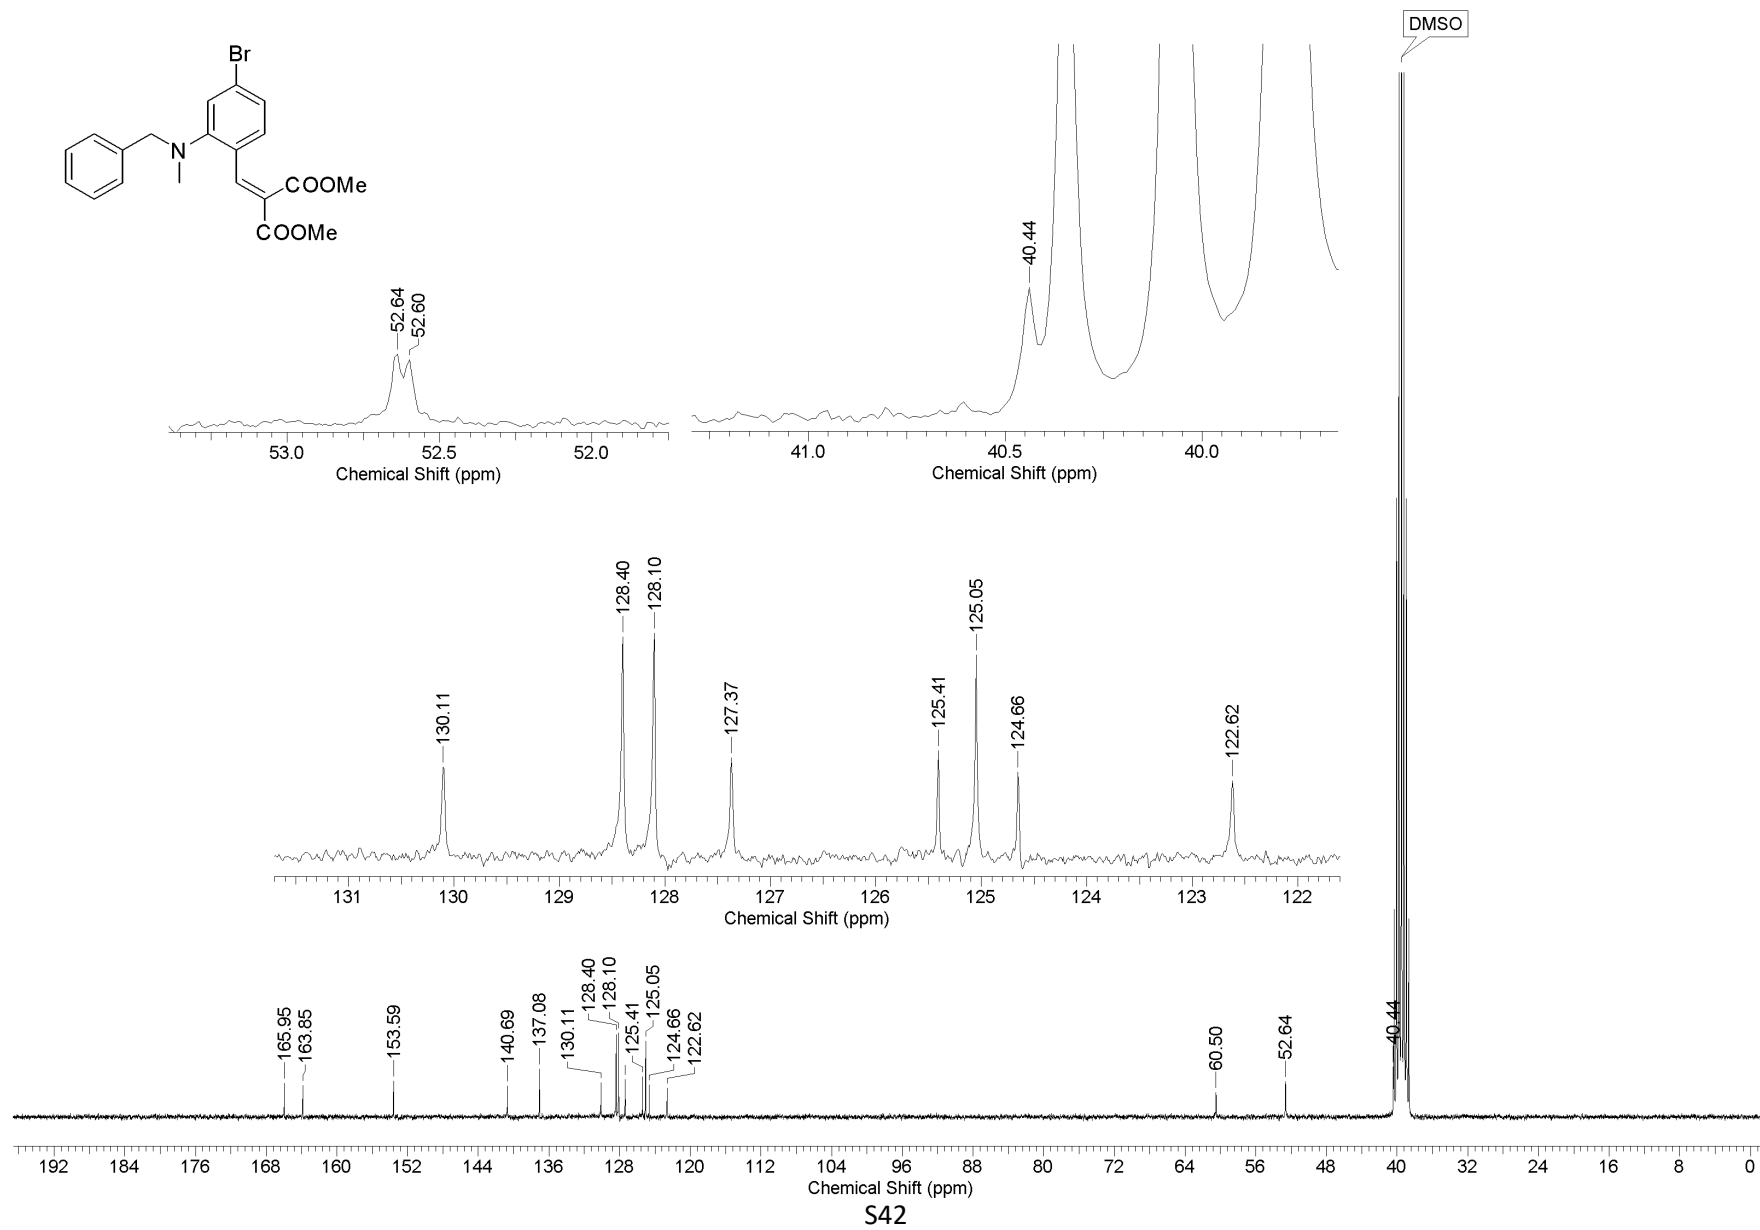

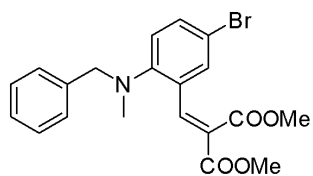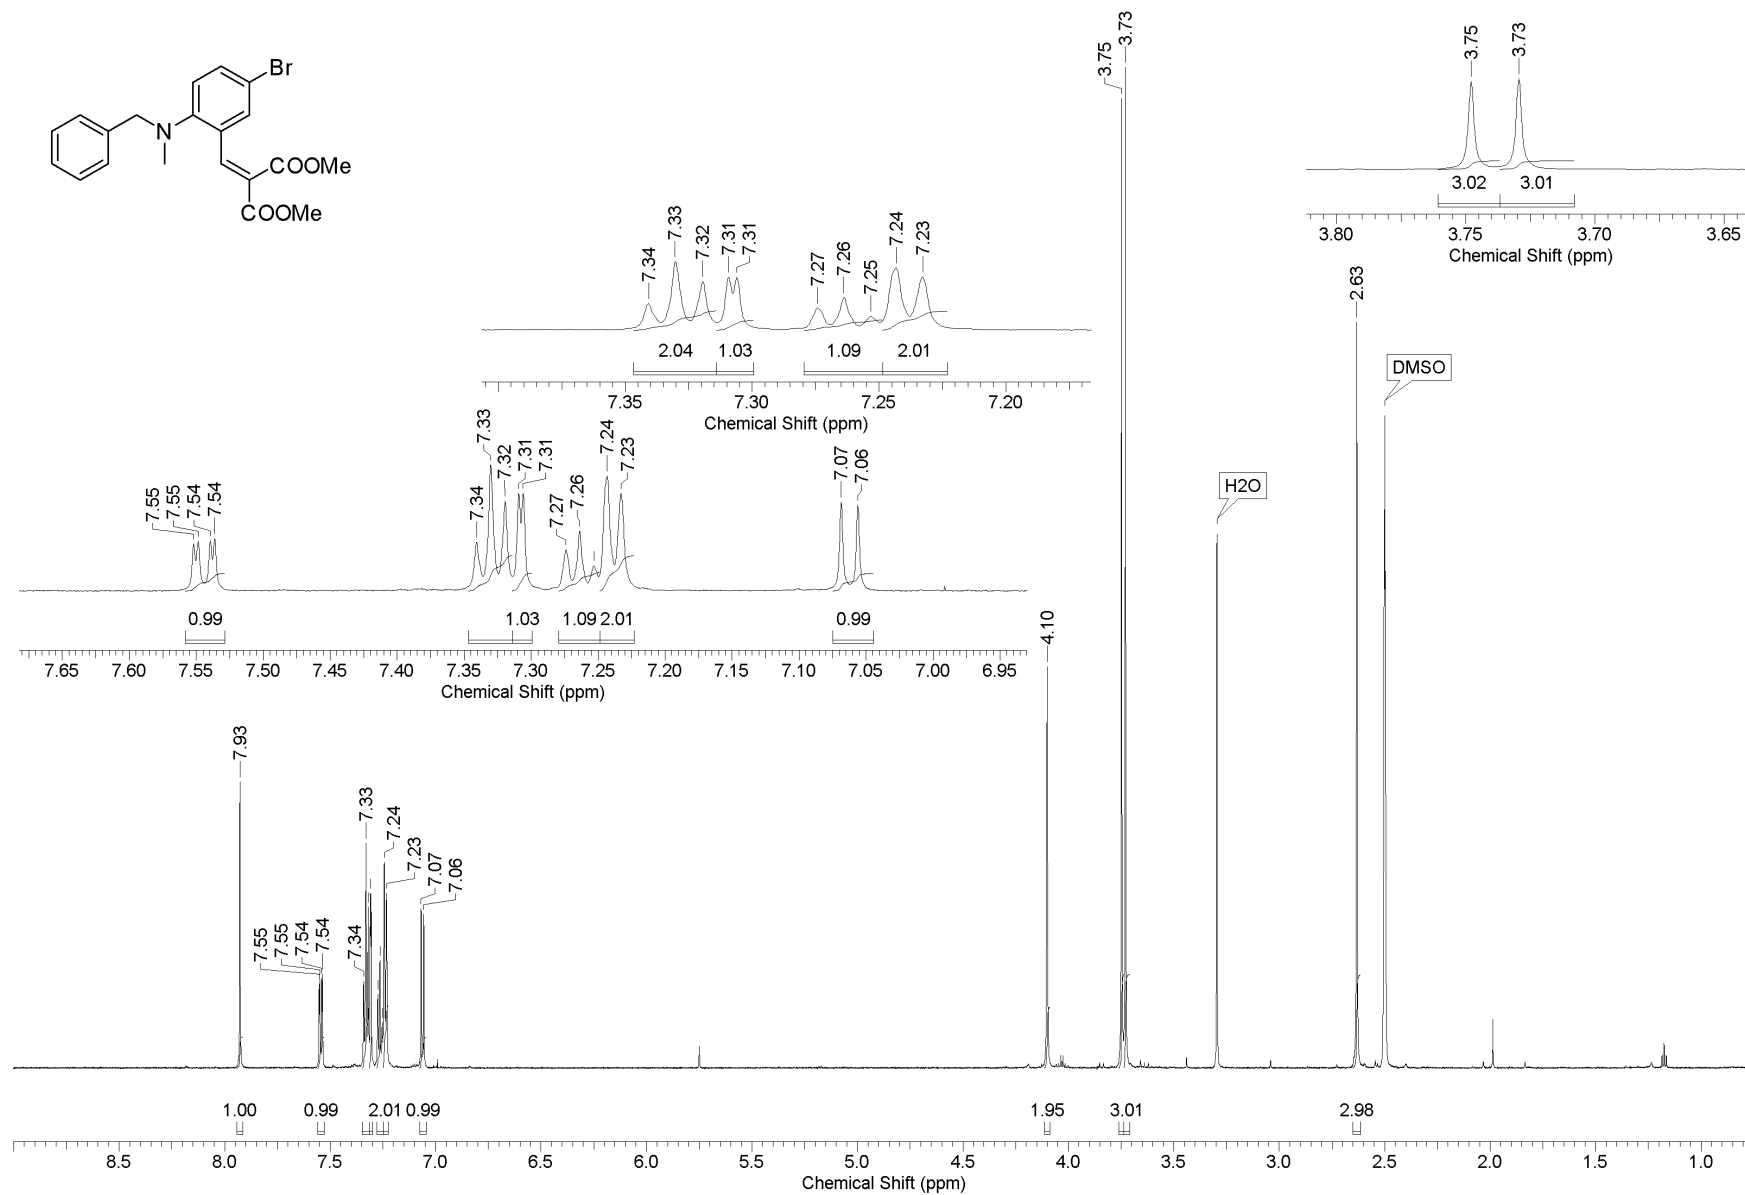

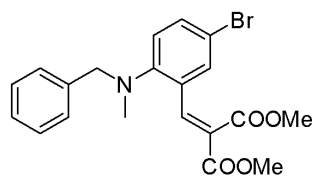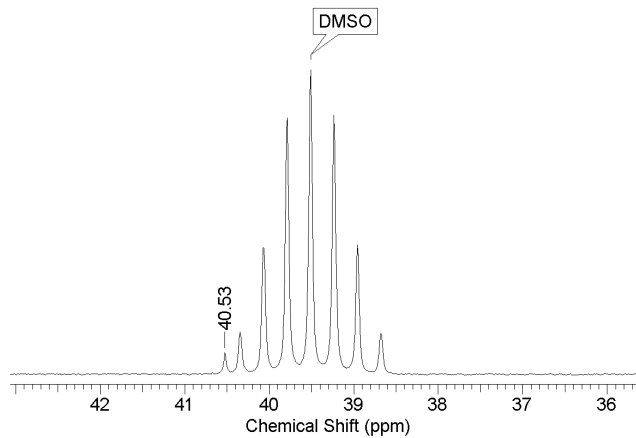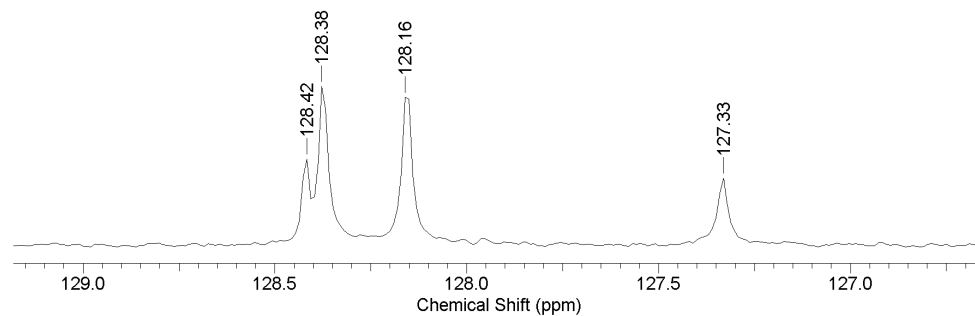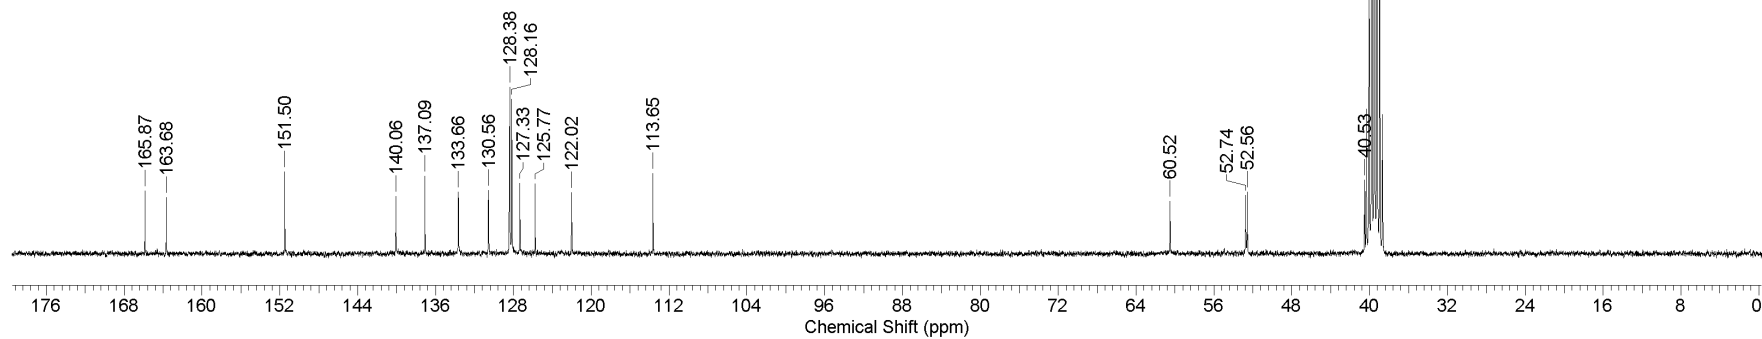

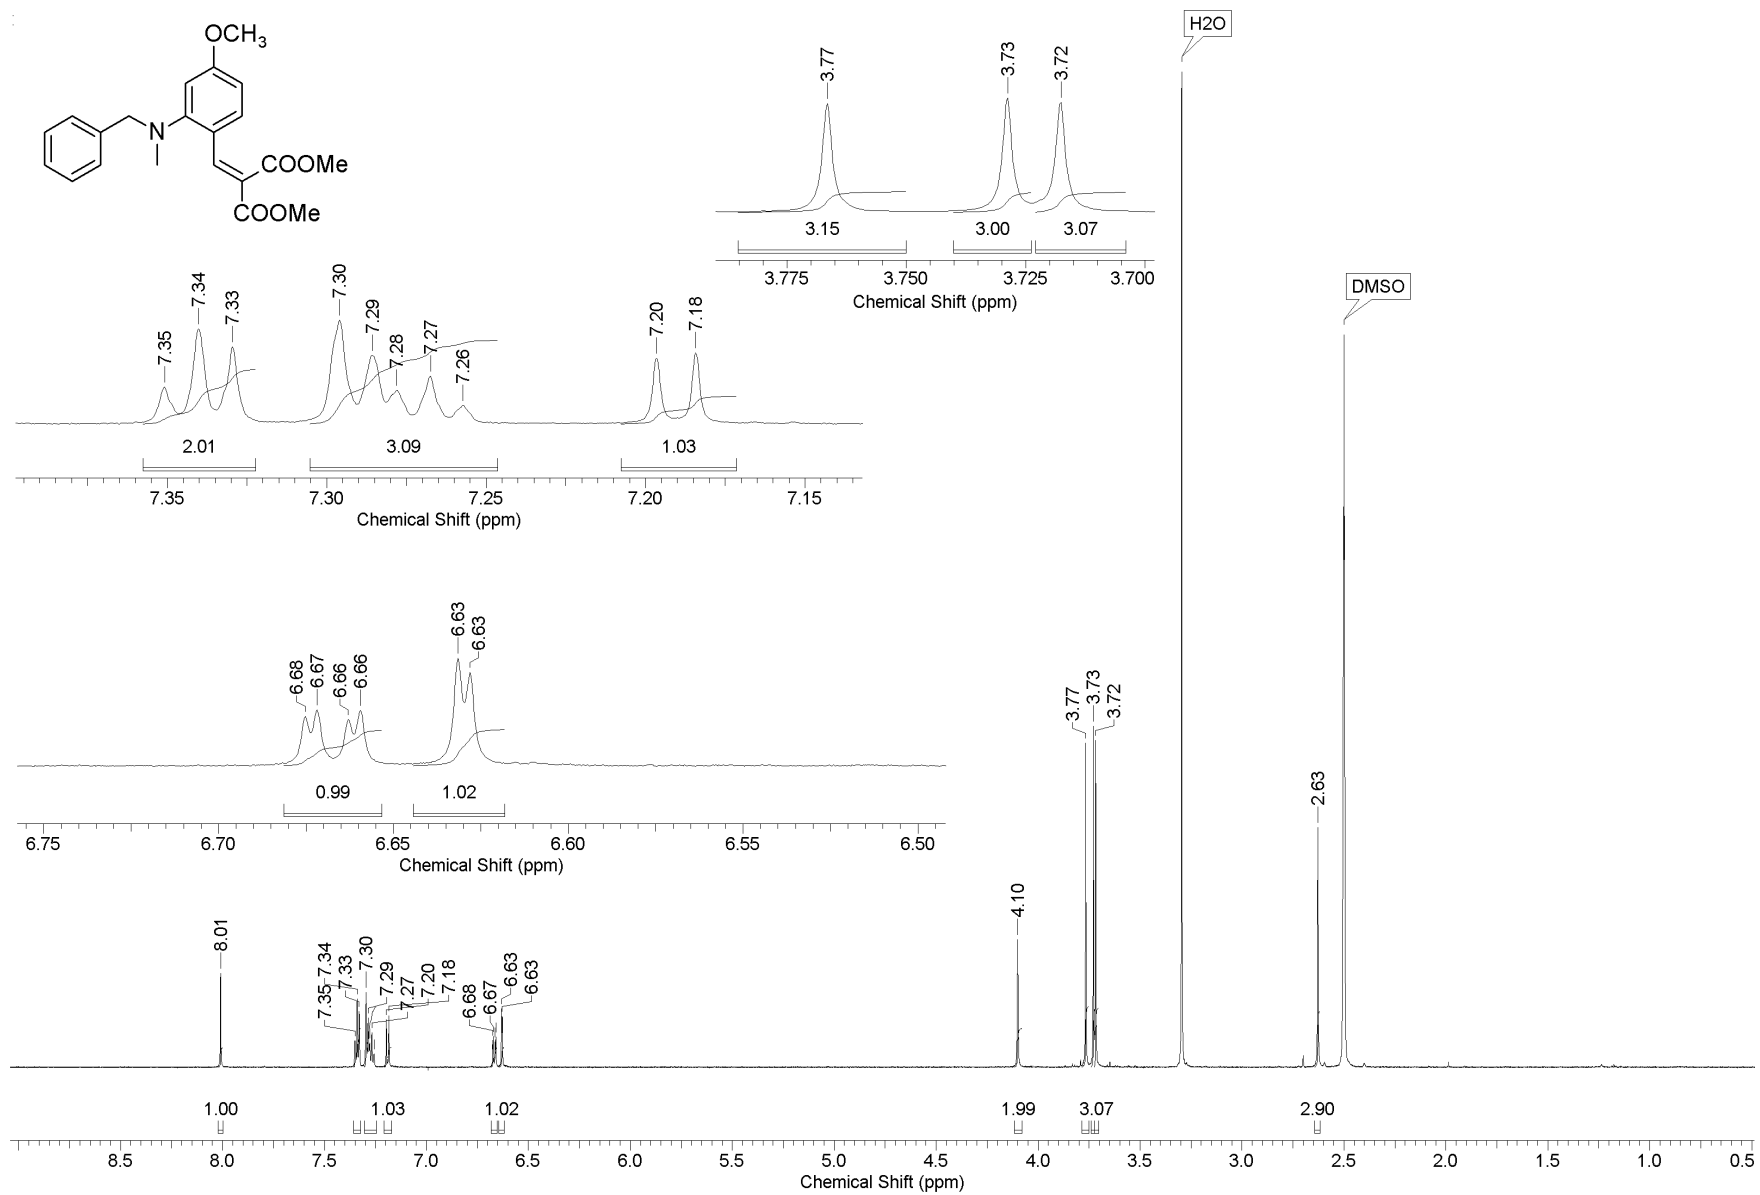

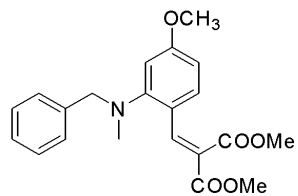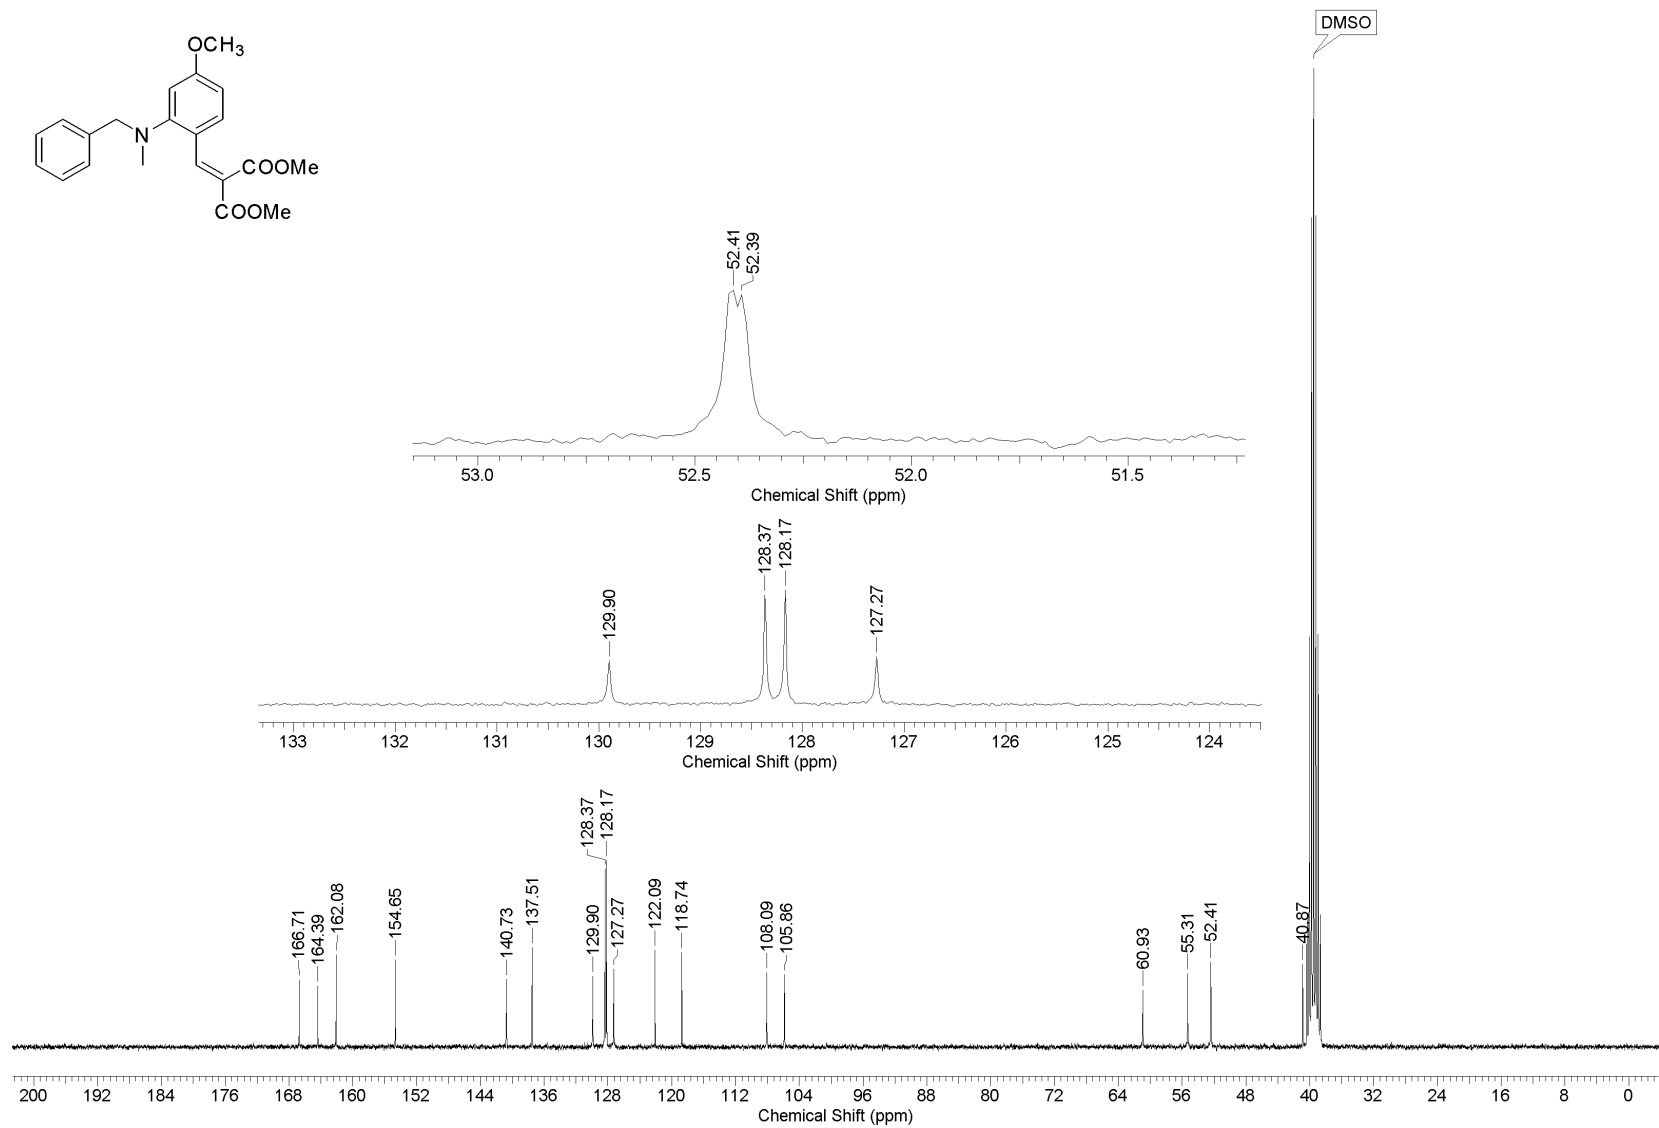

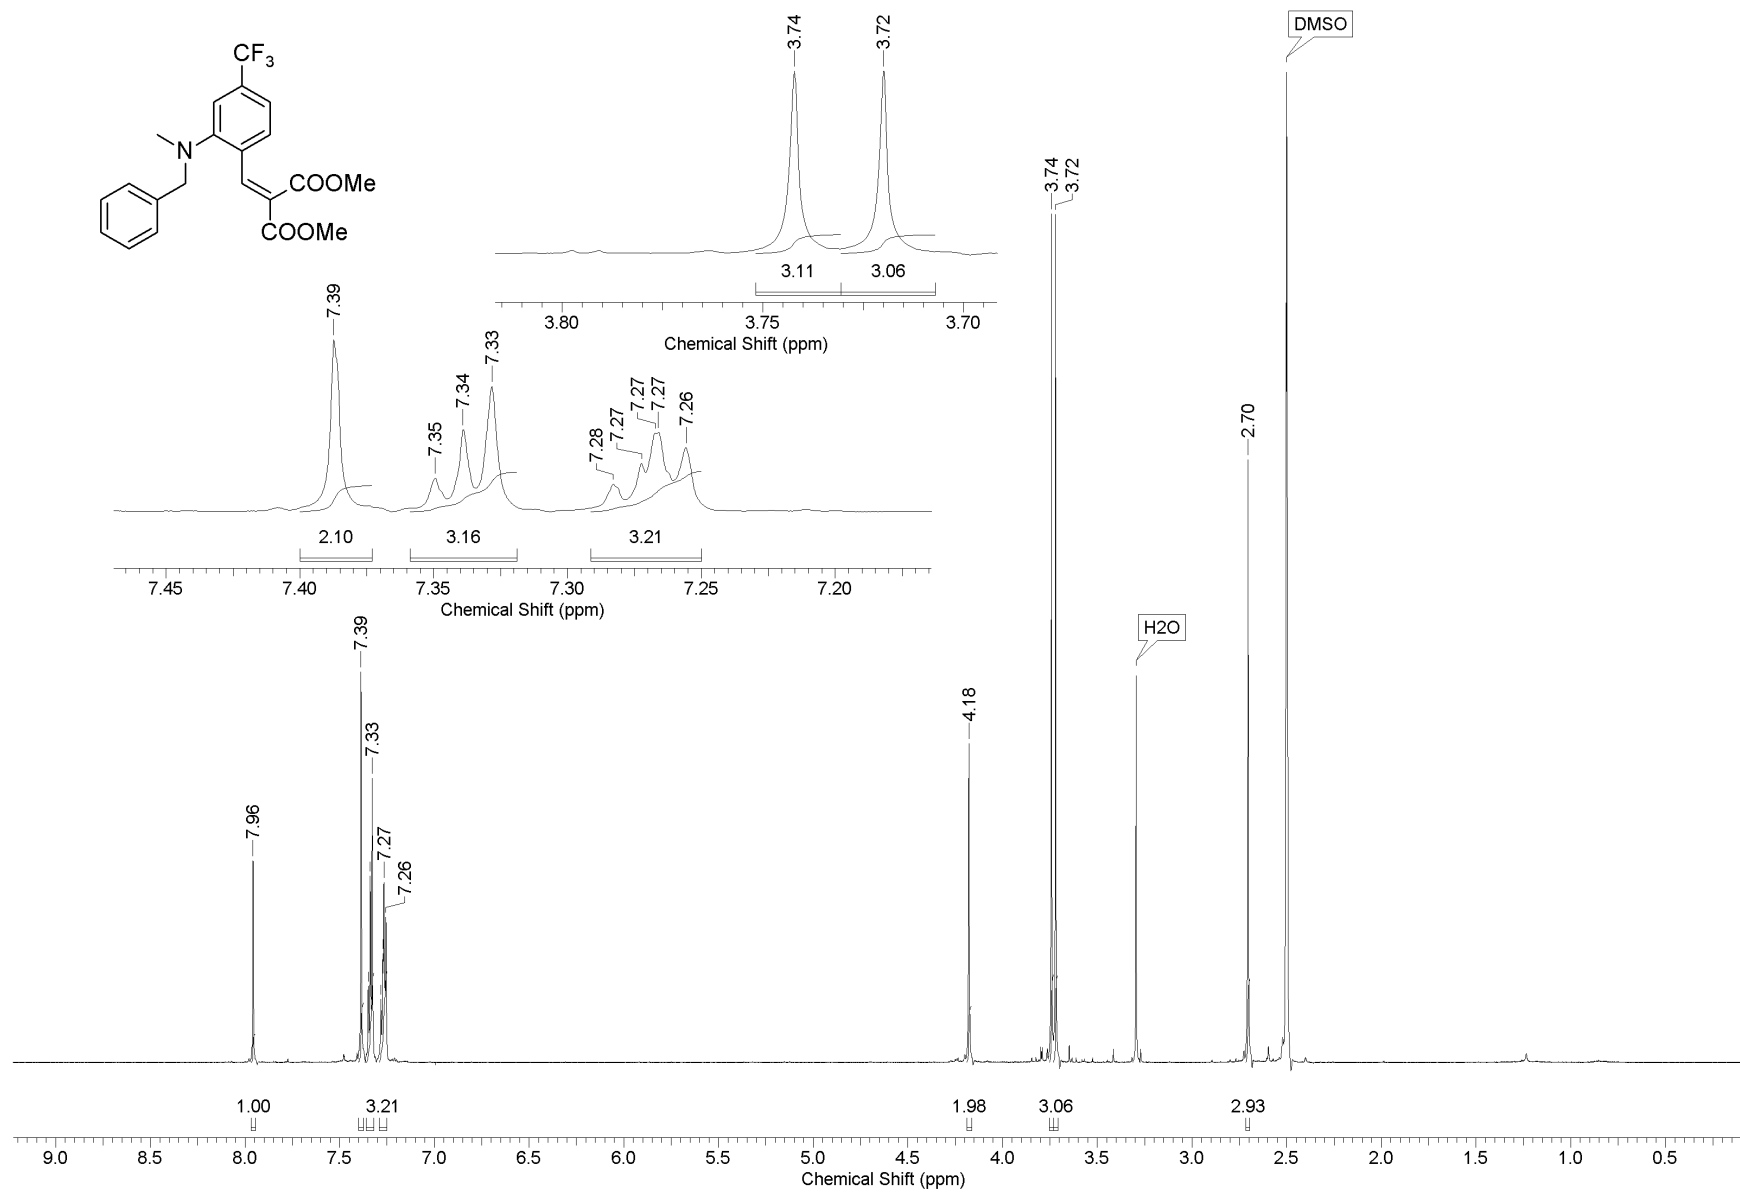

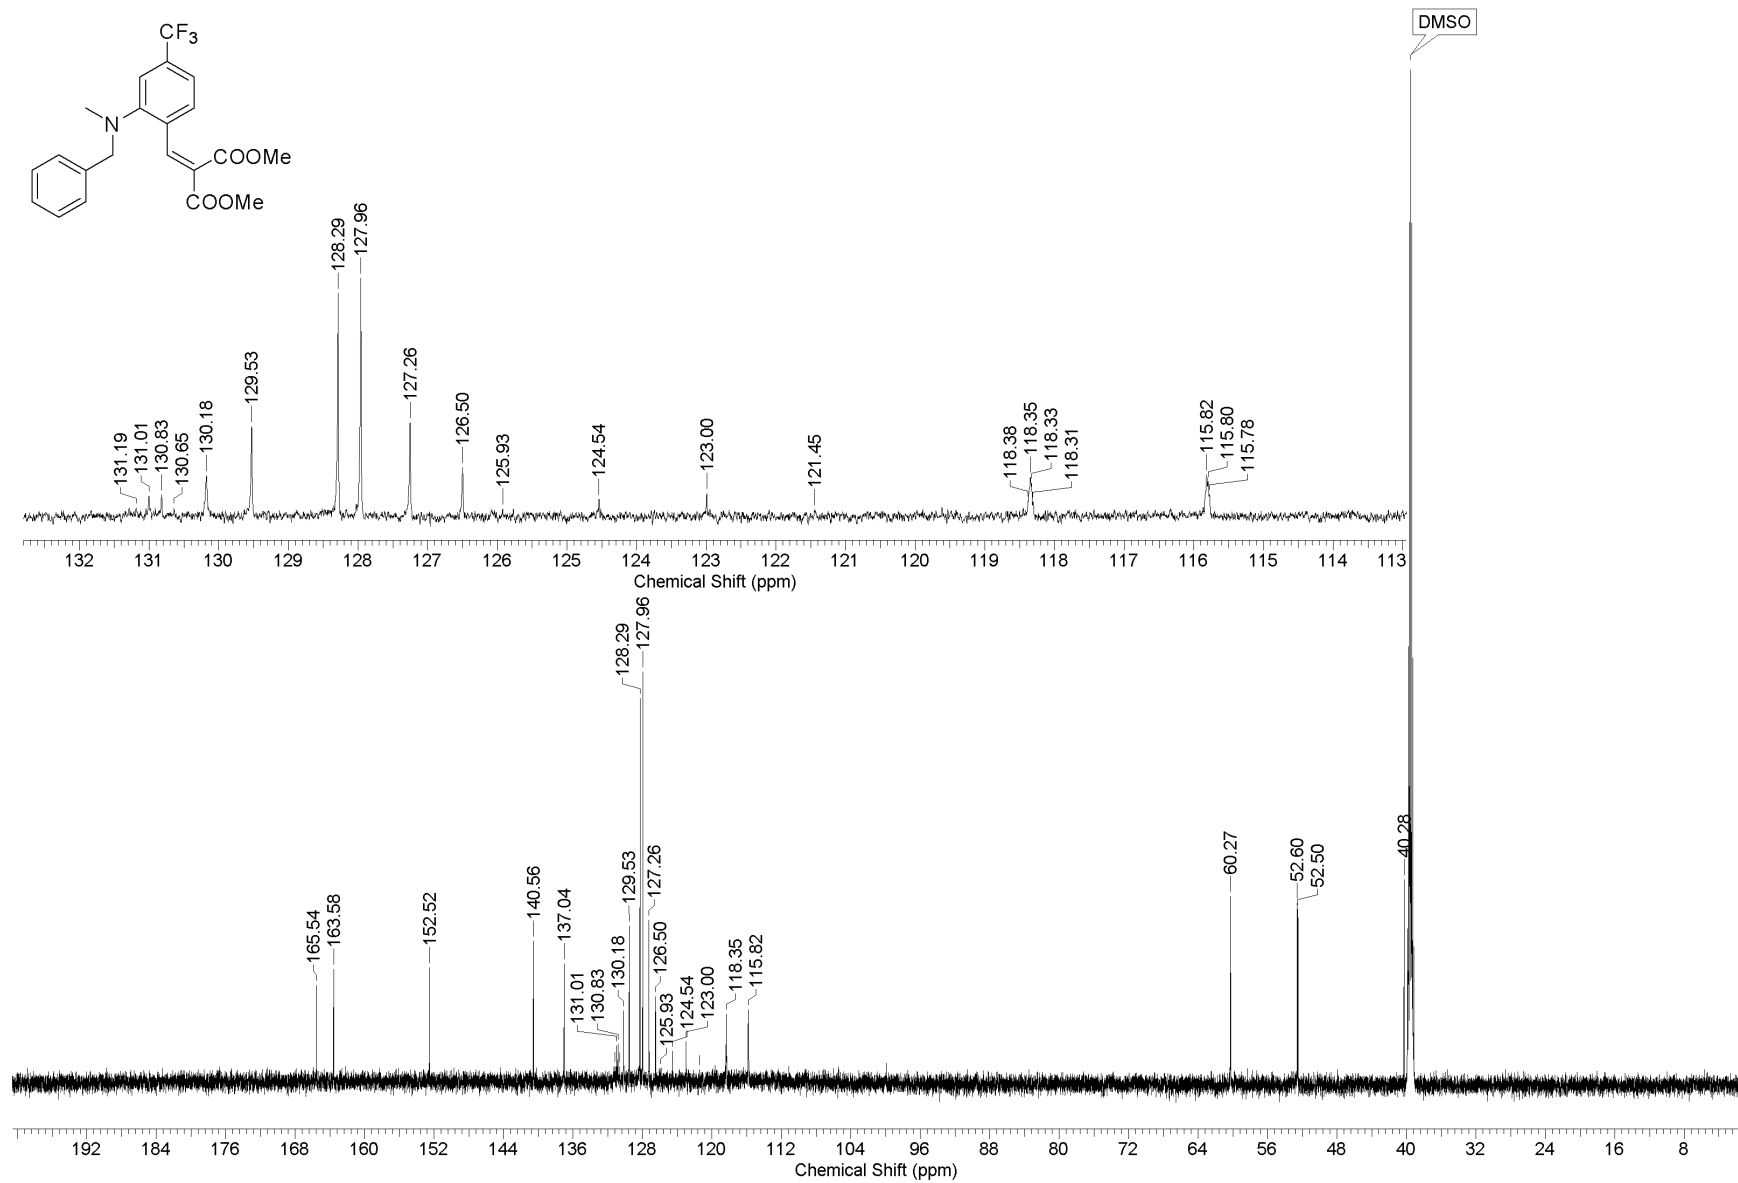

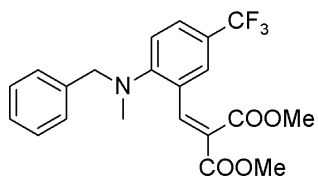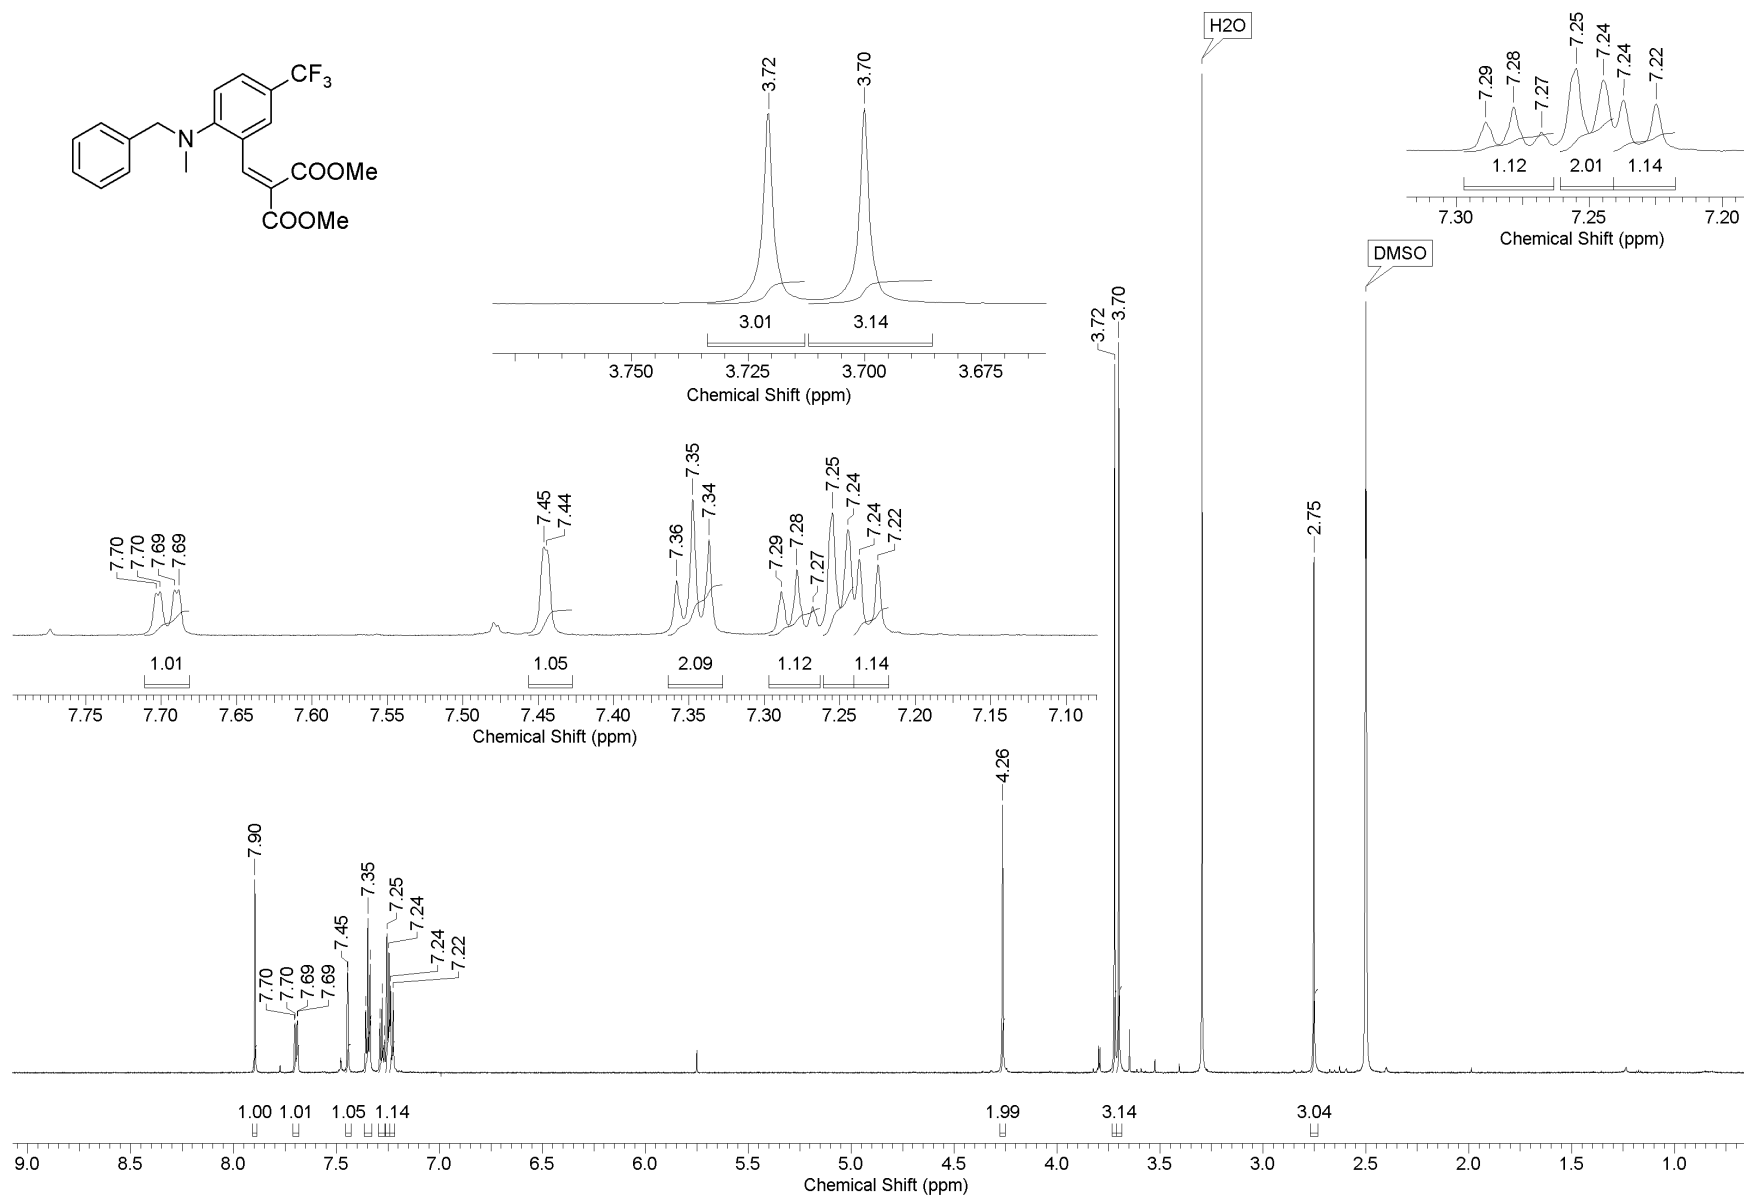

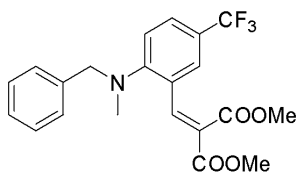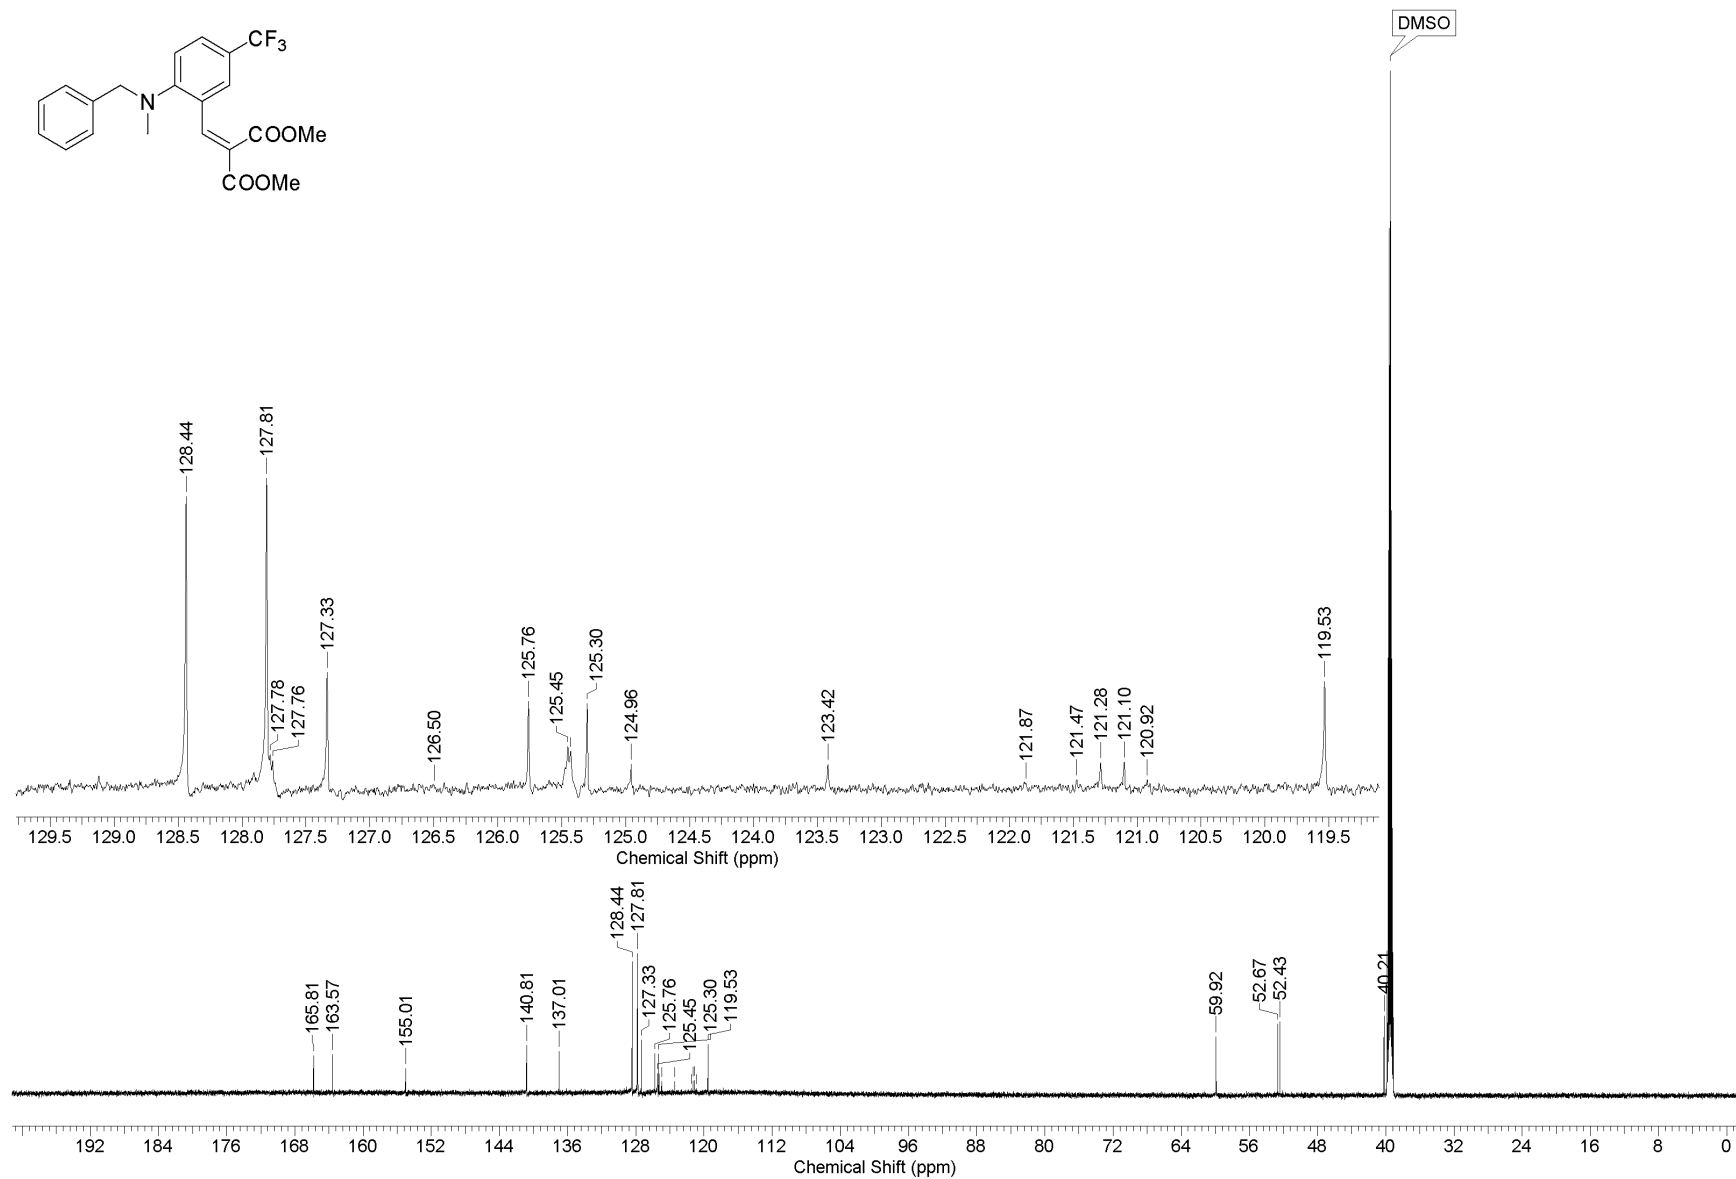

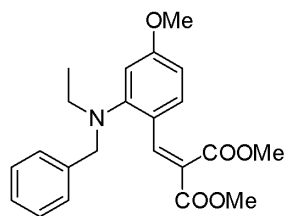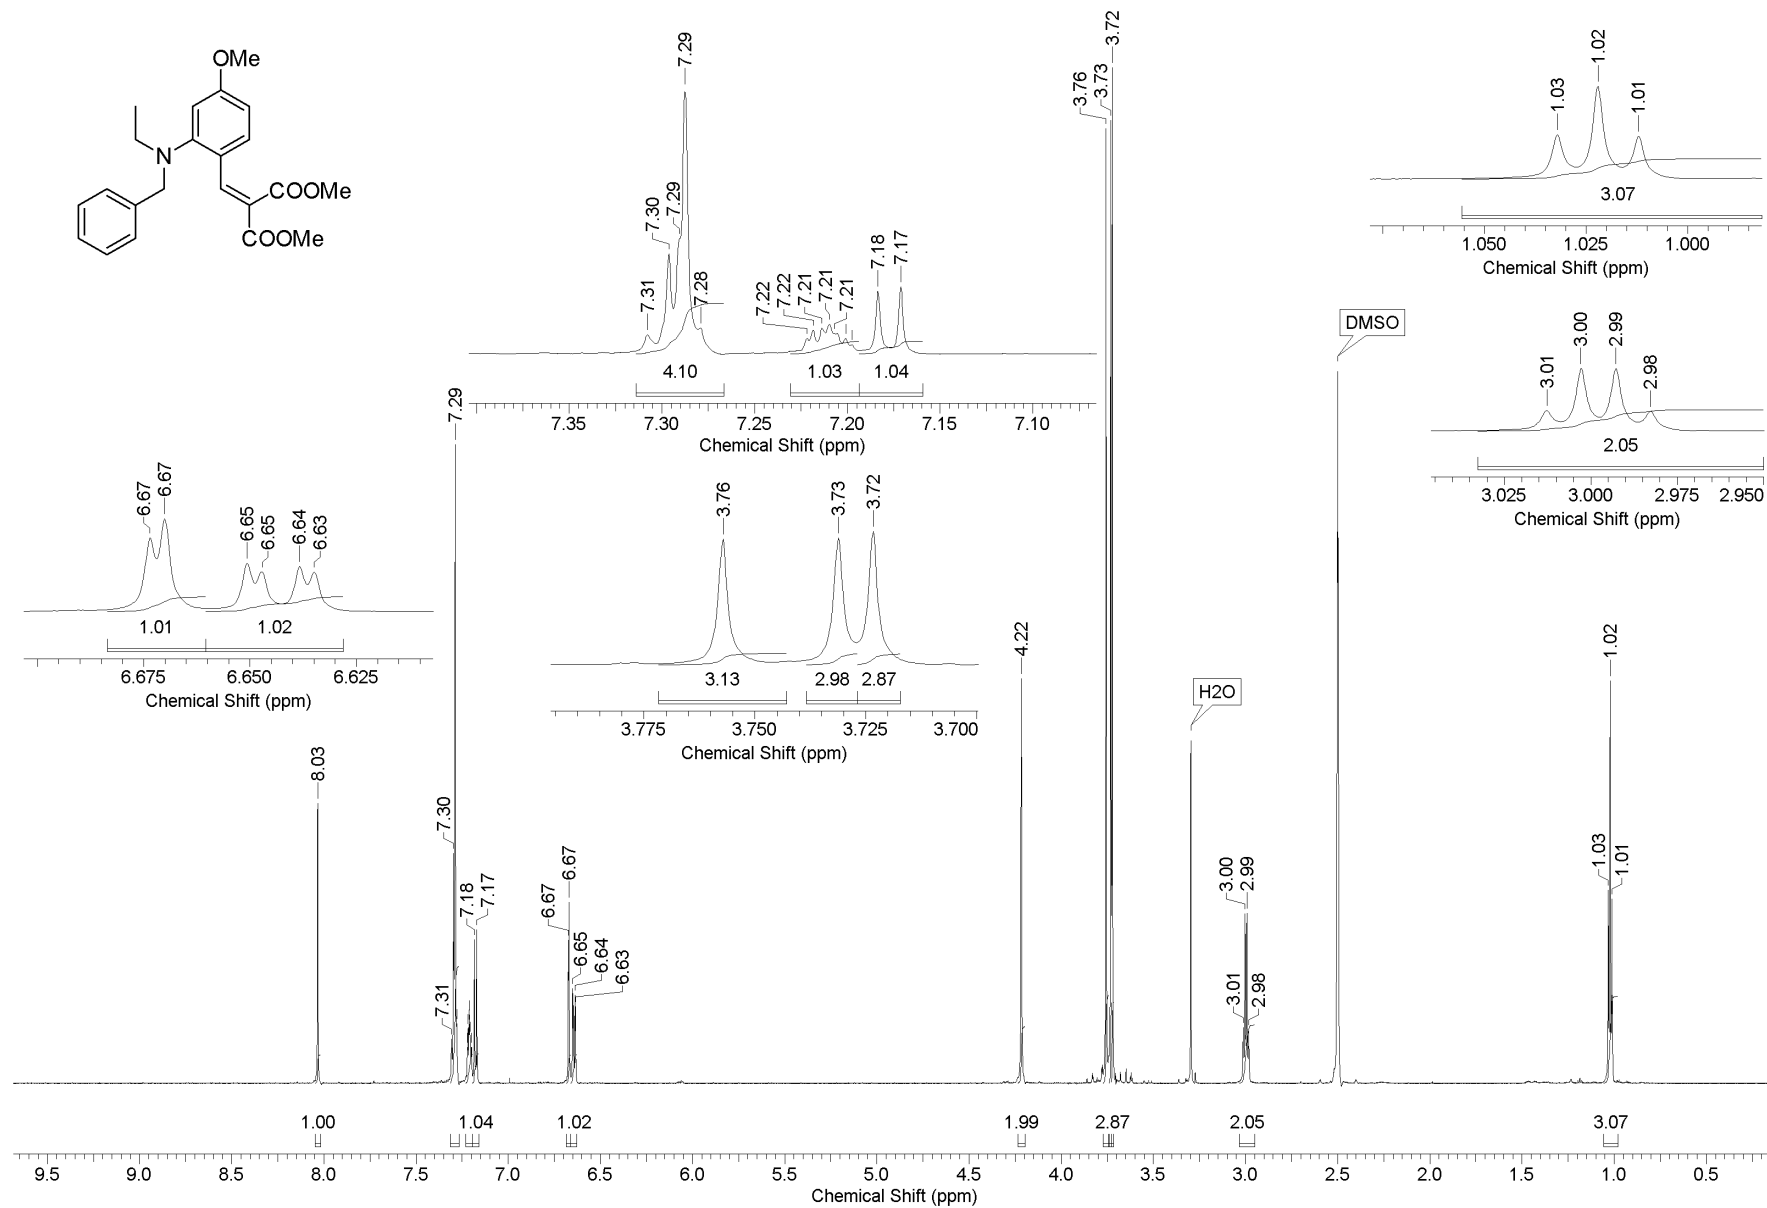

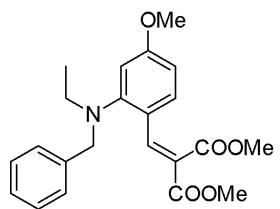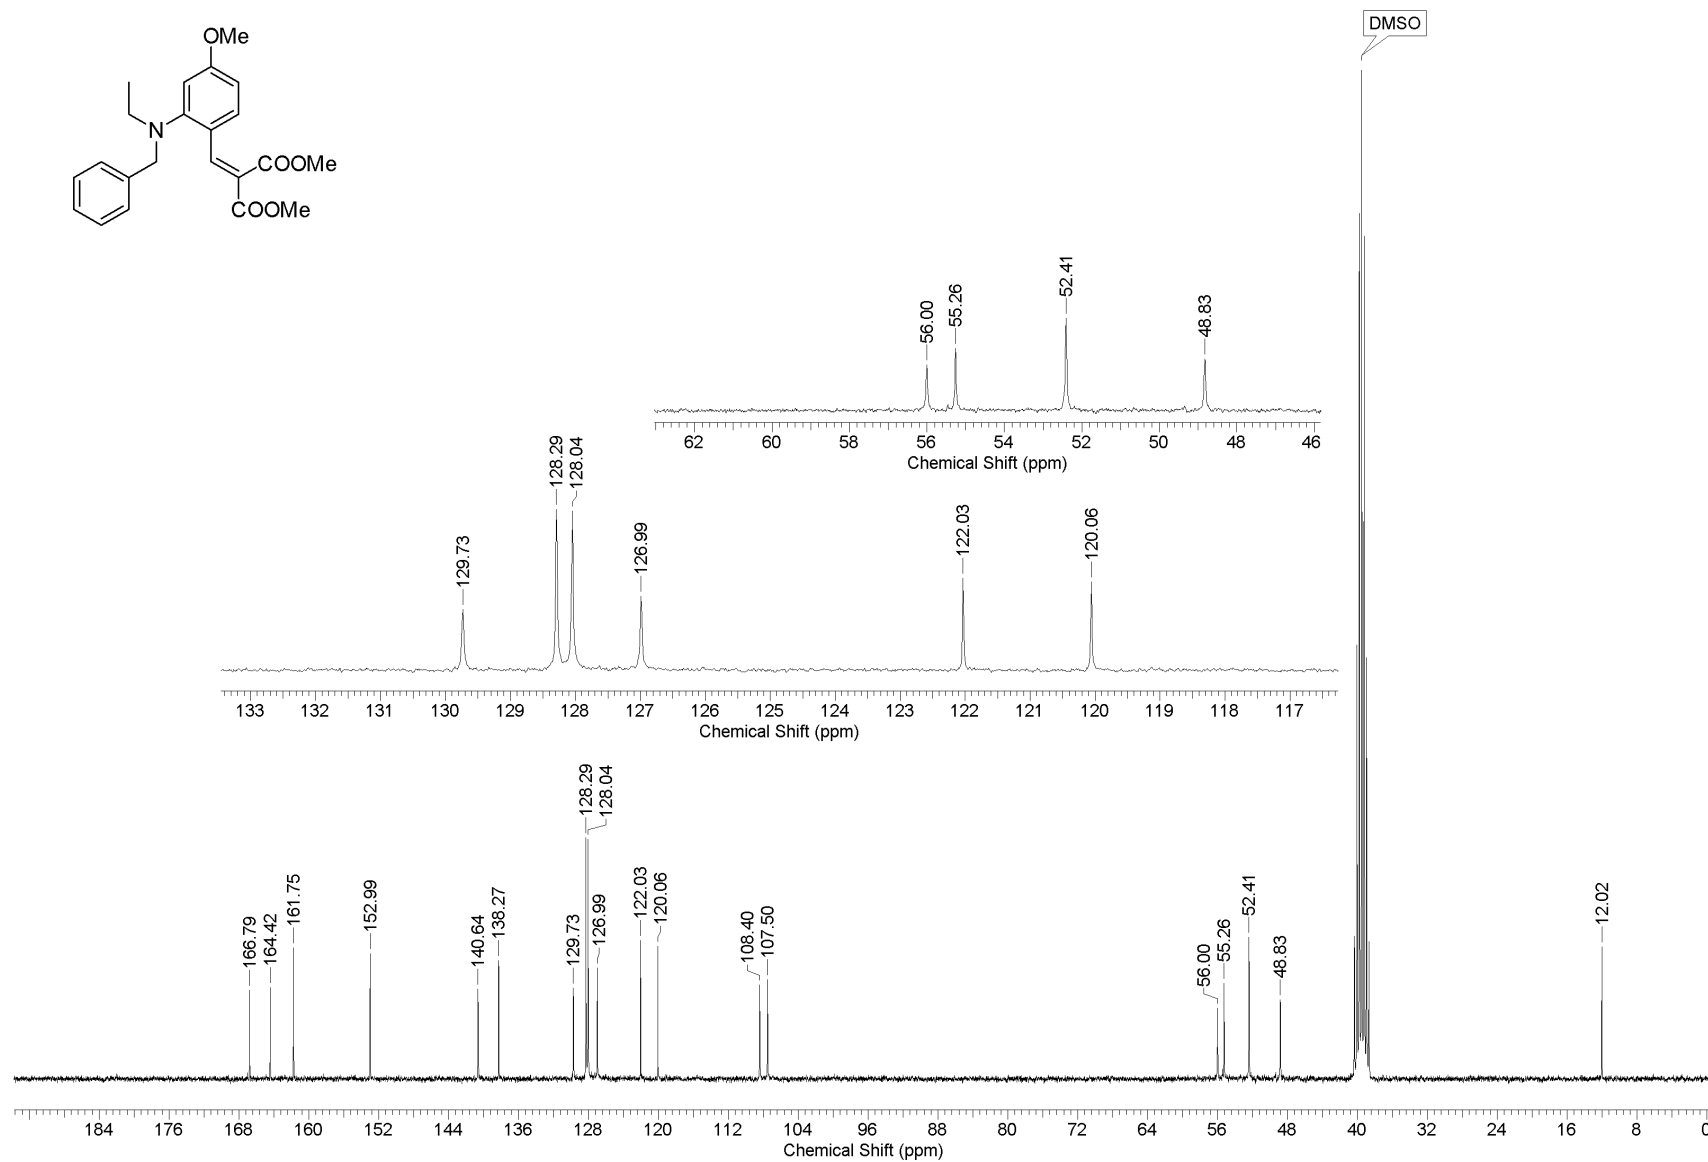

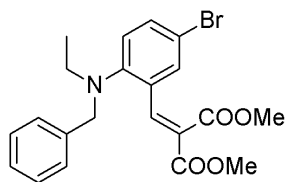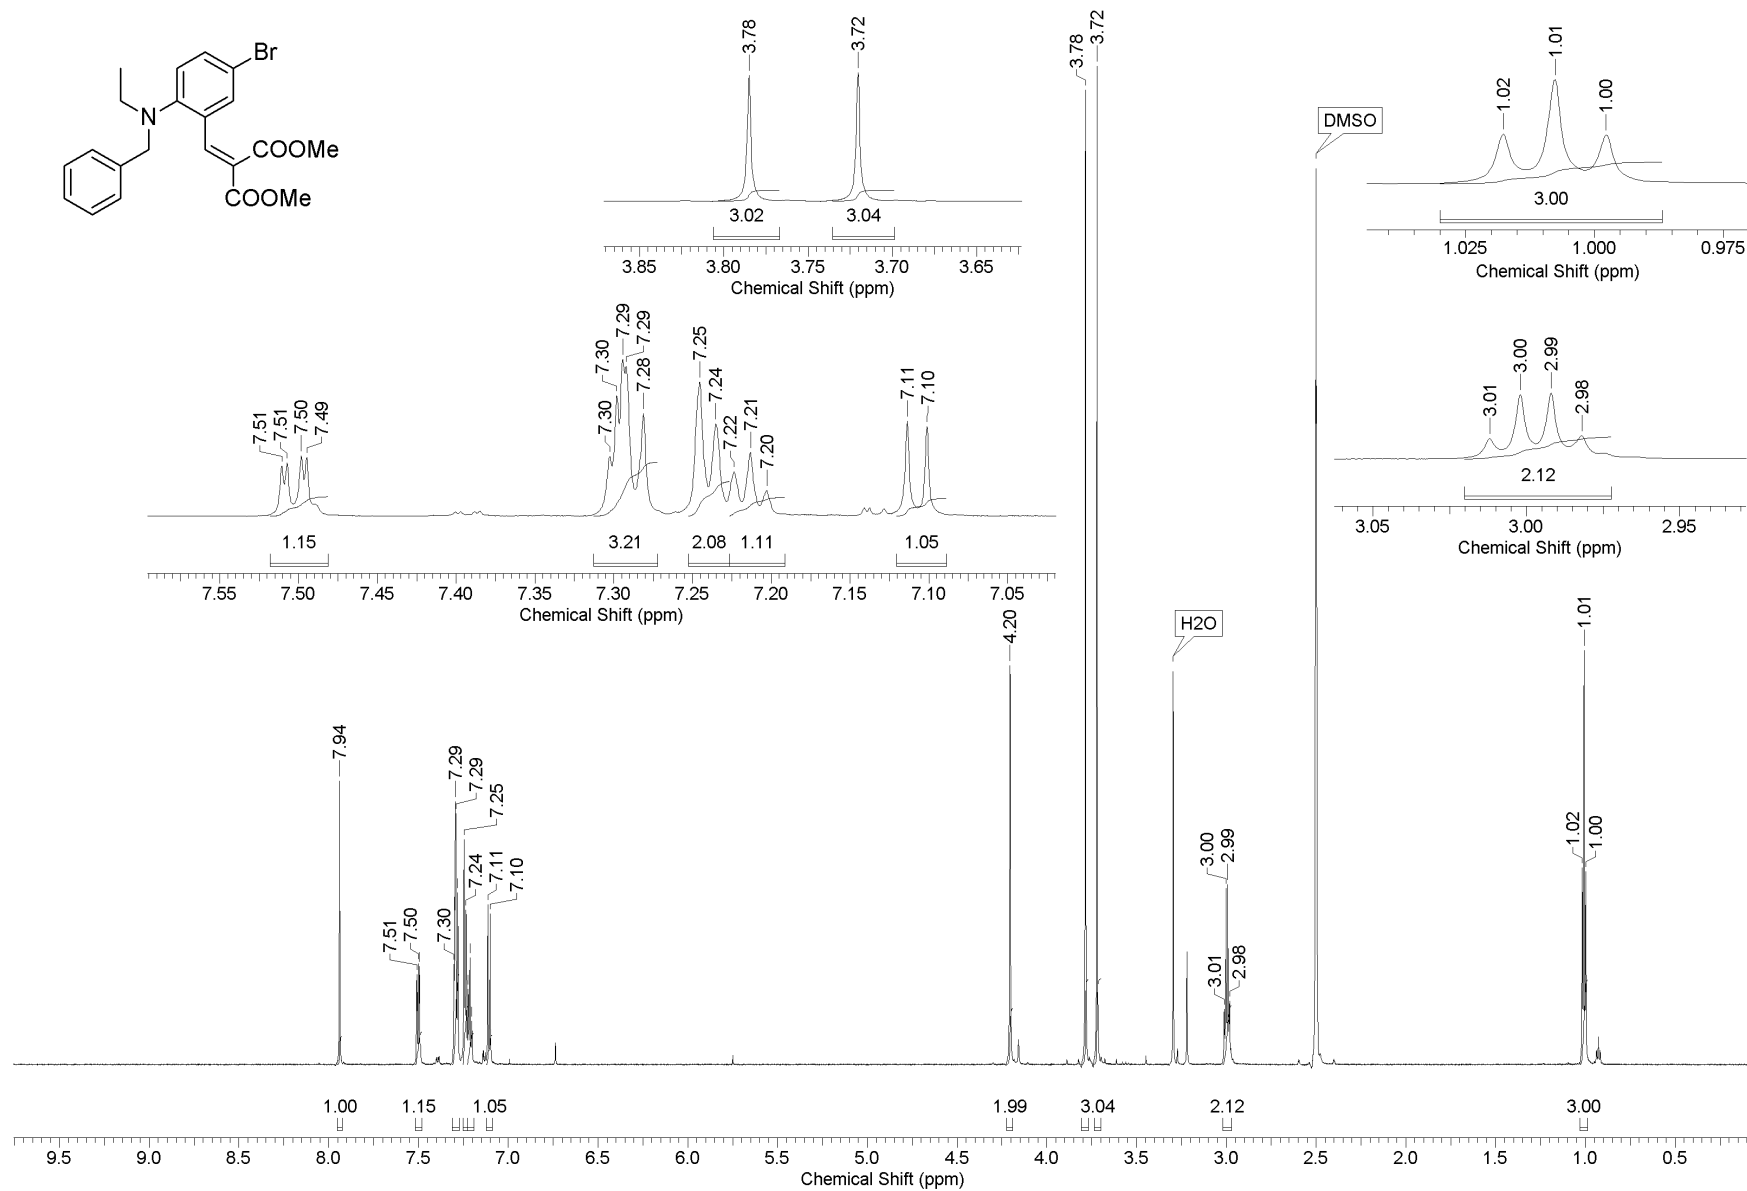

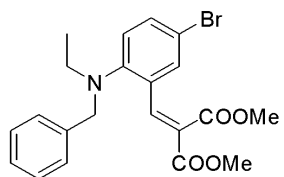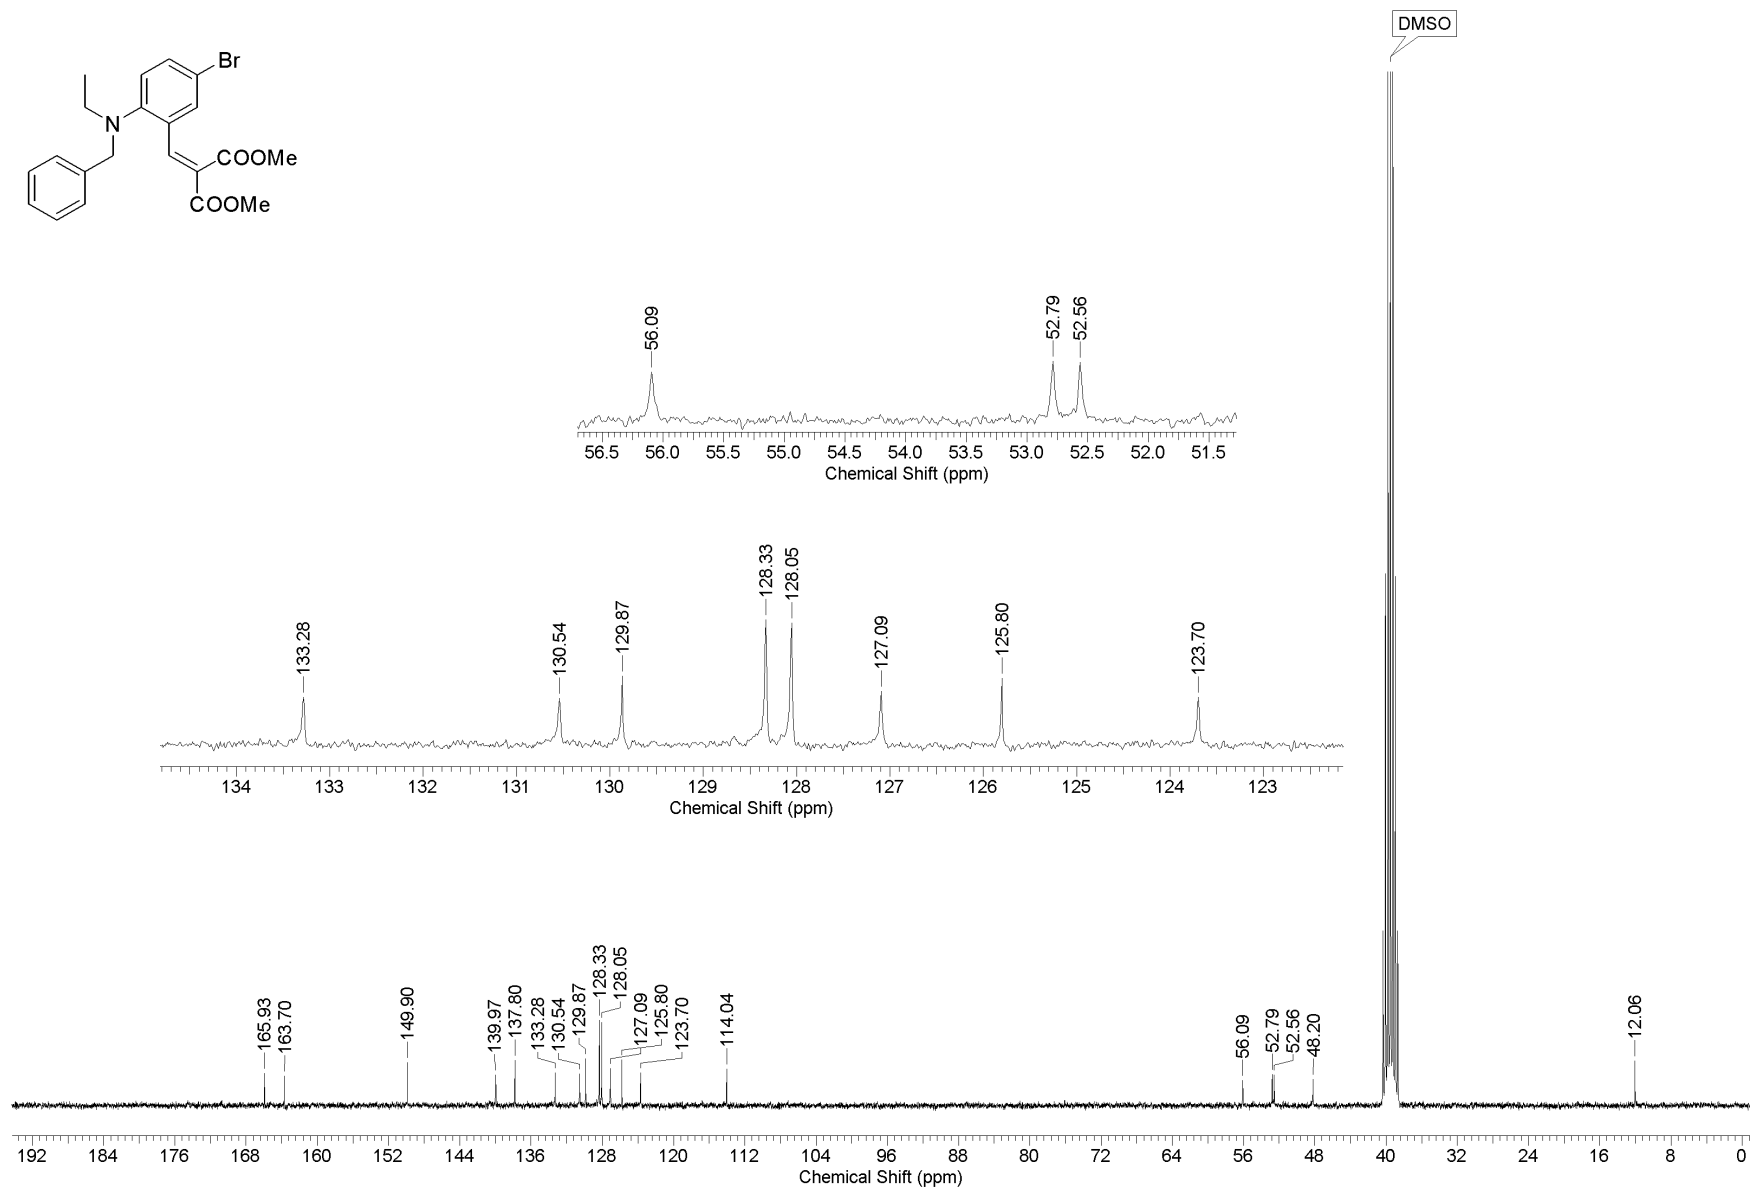

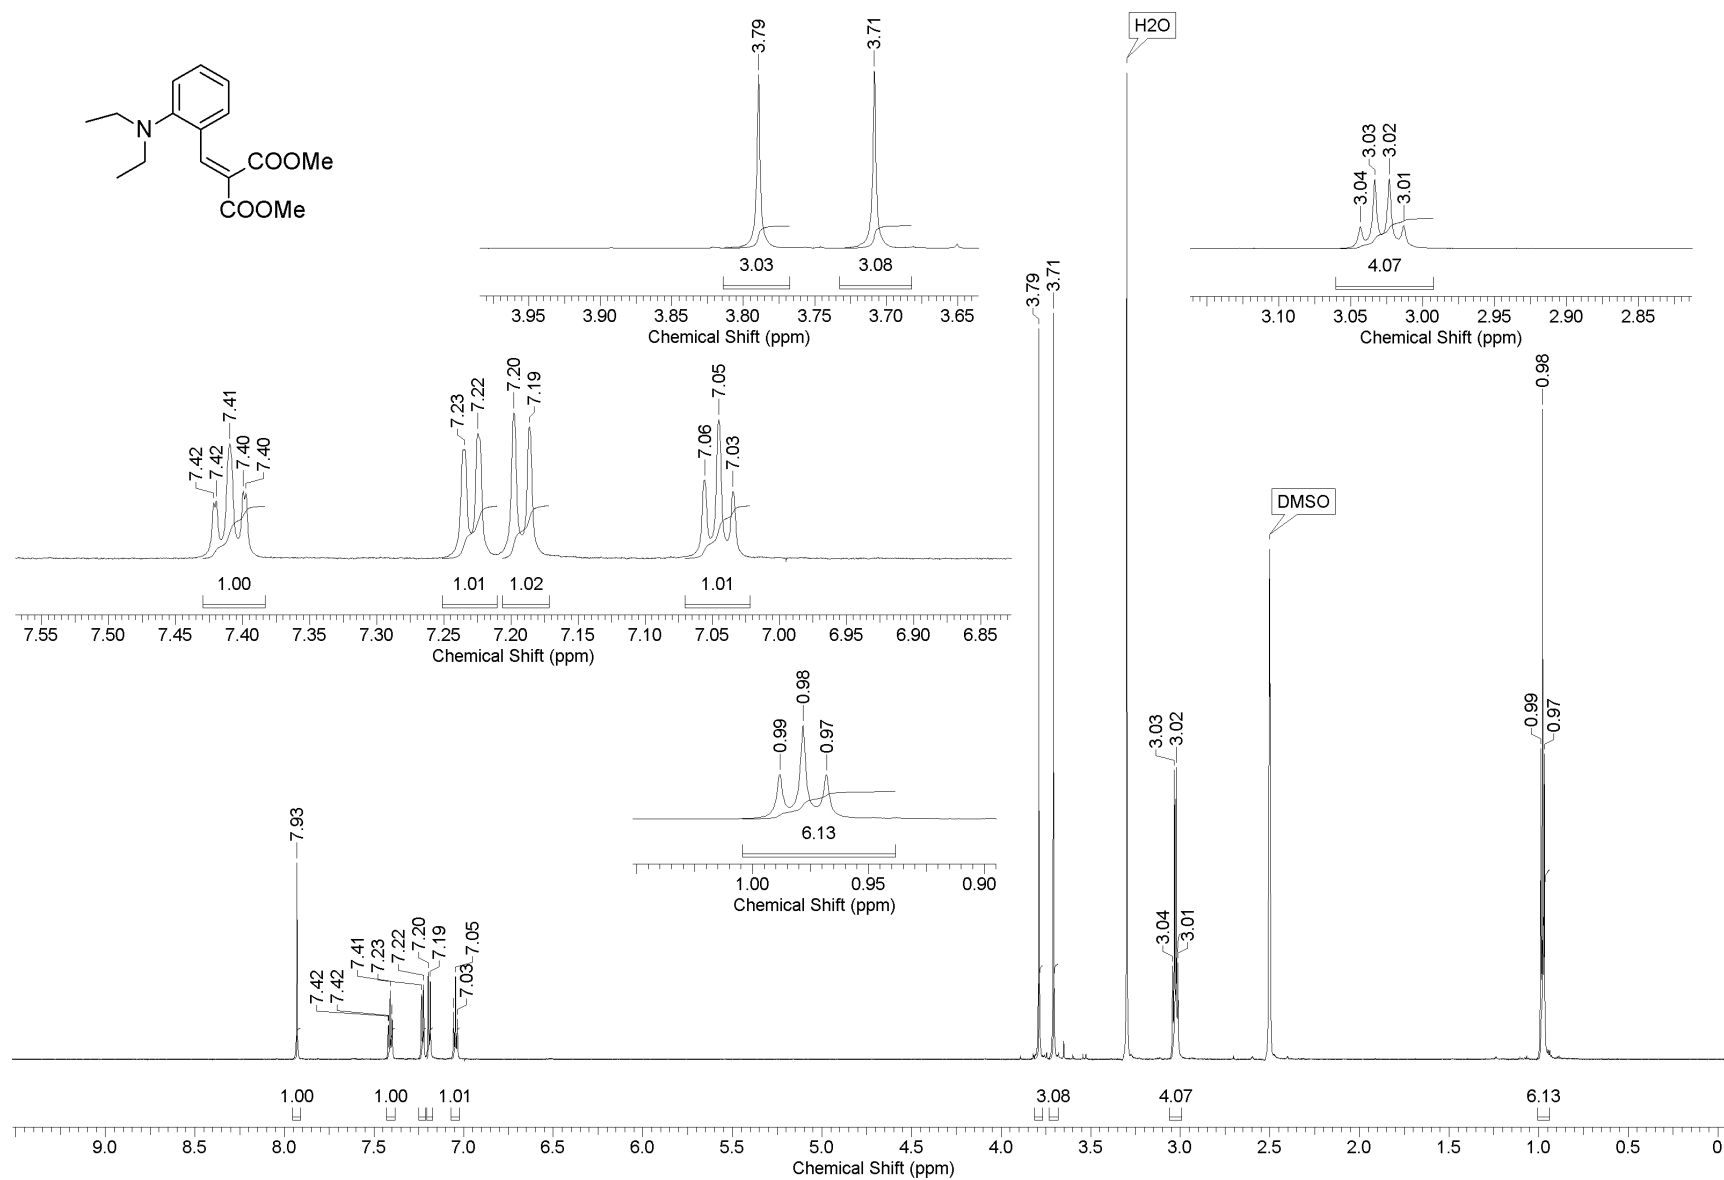

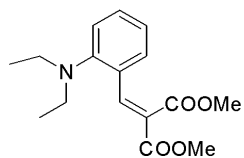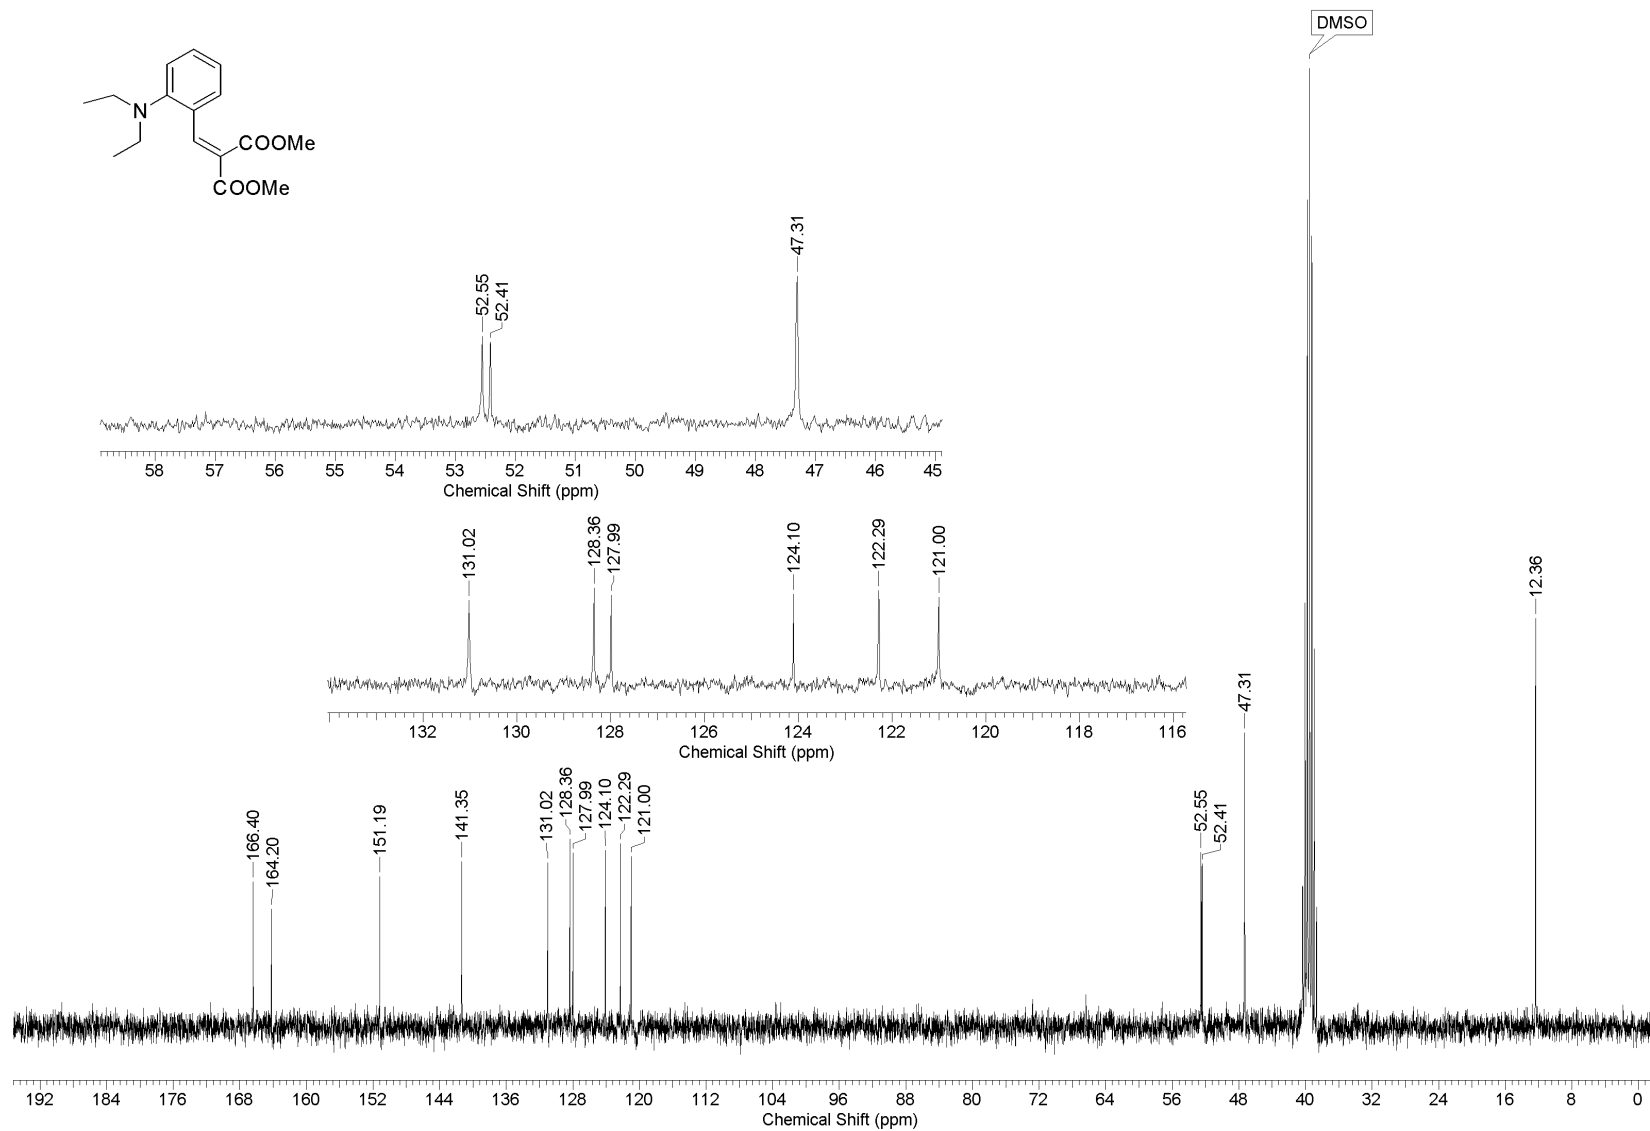

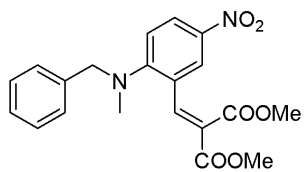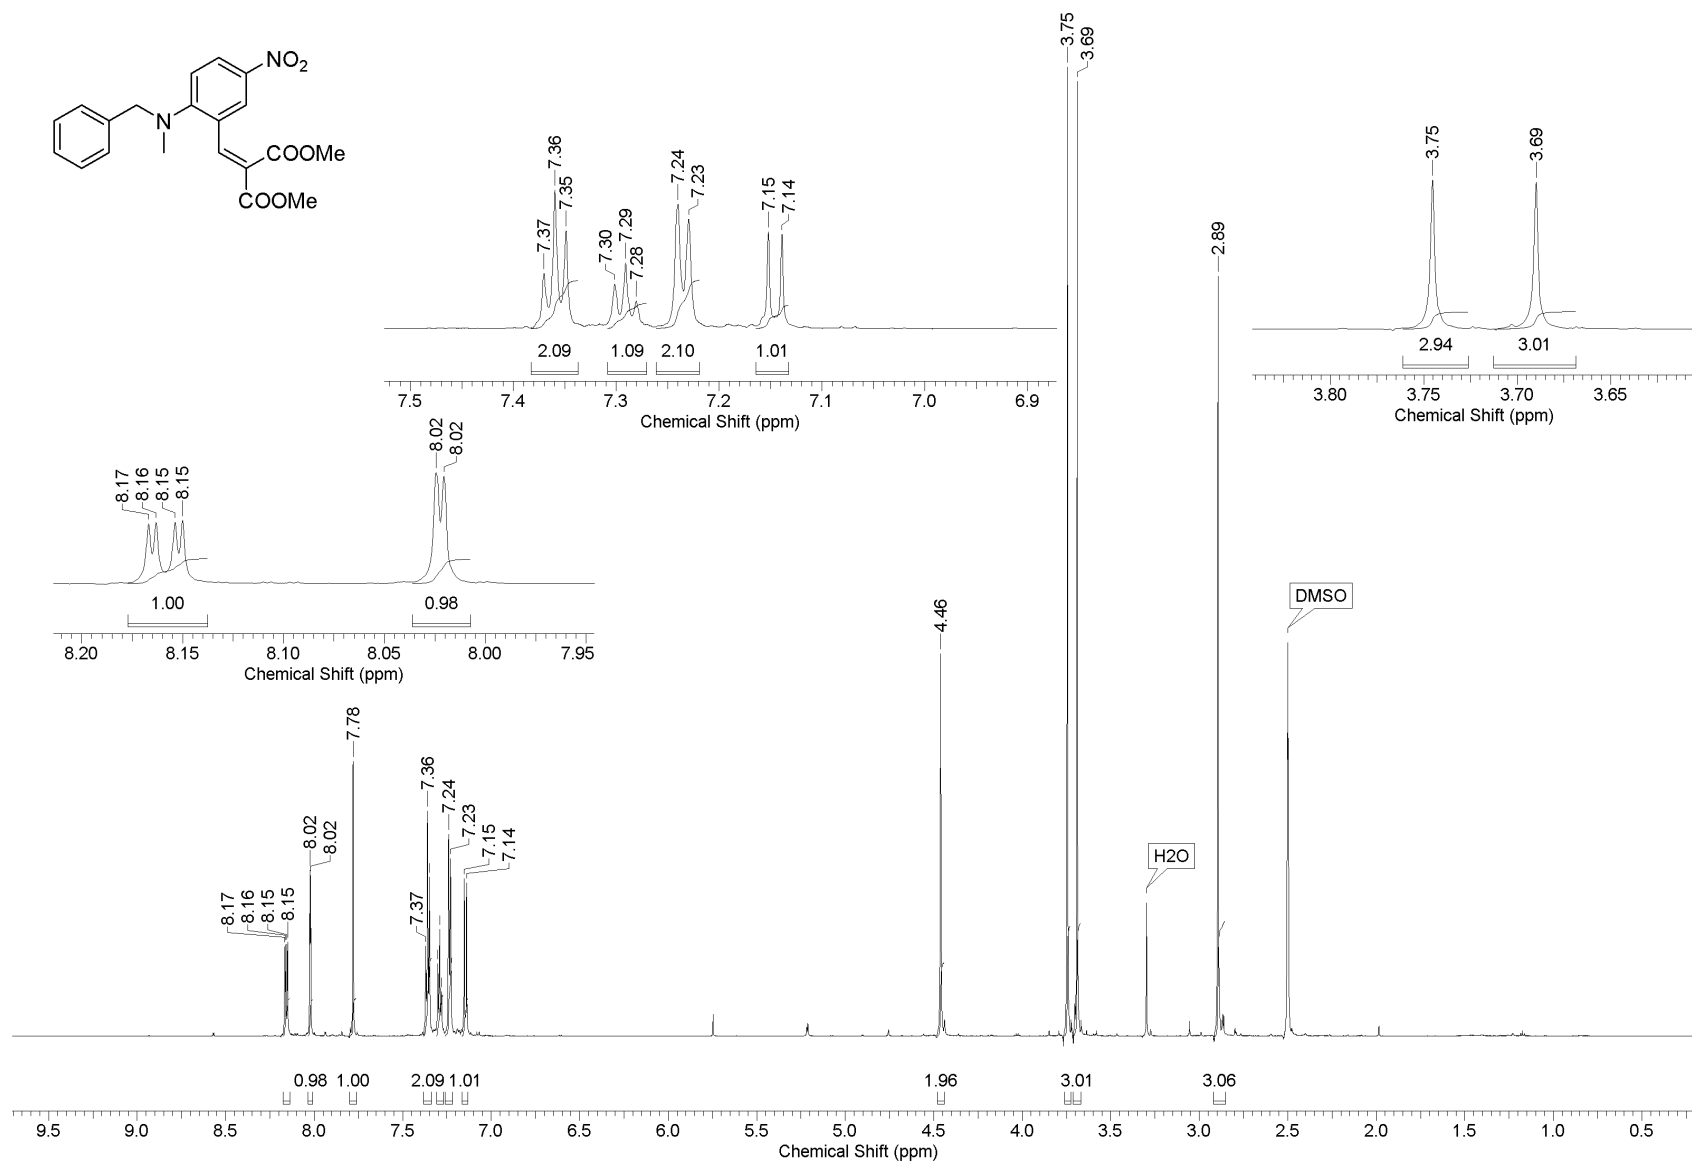

S57

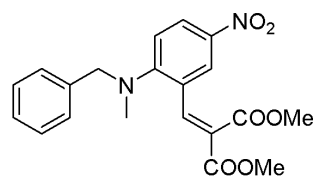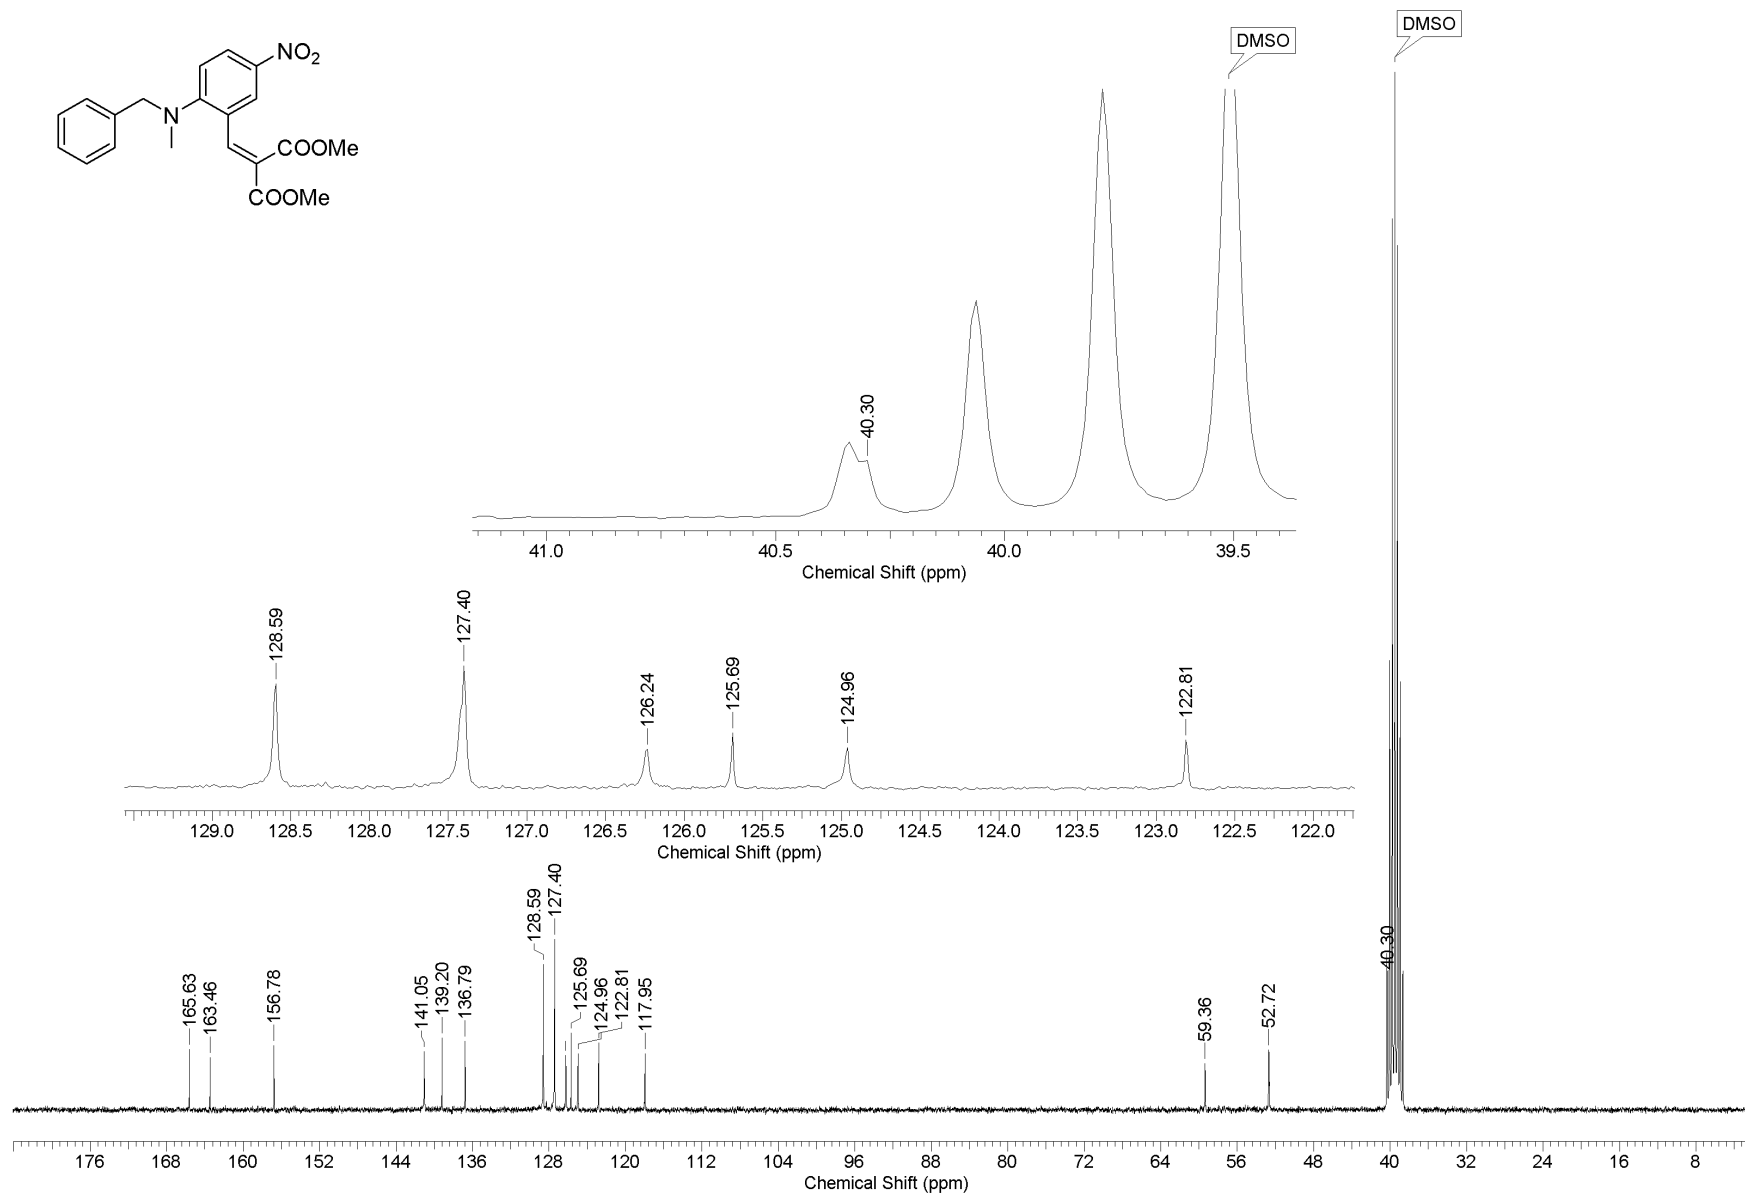

S58

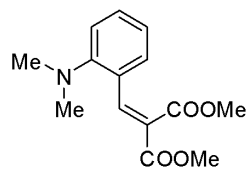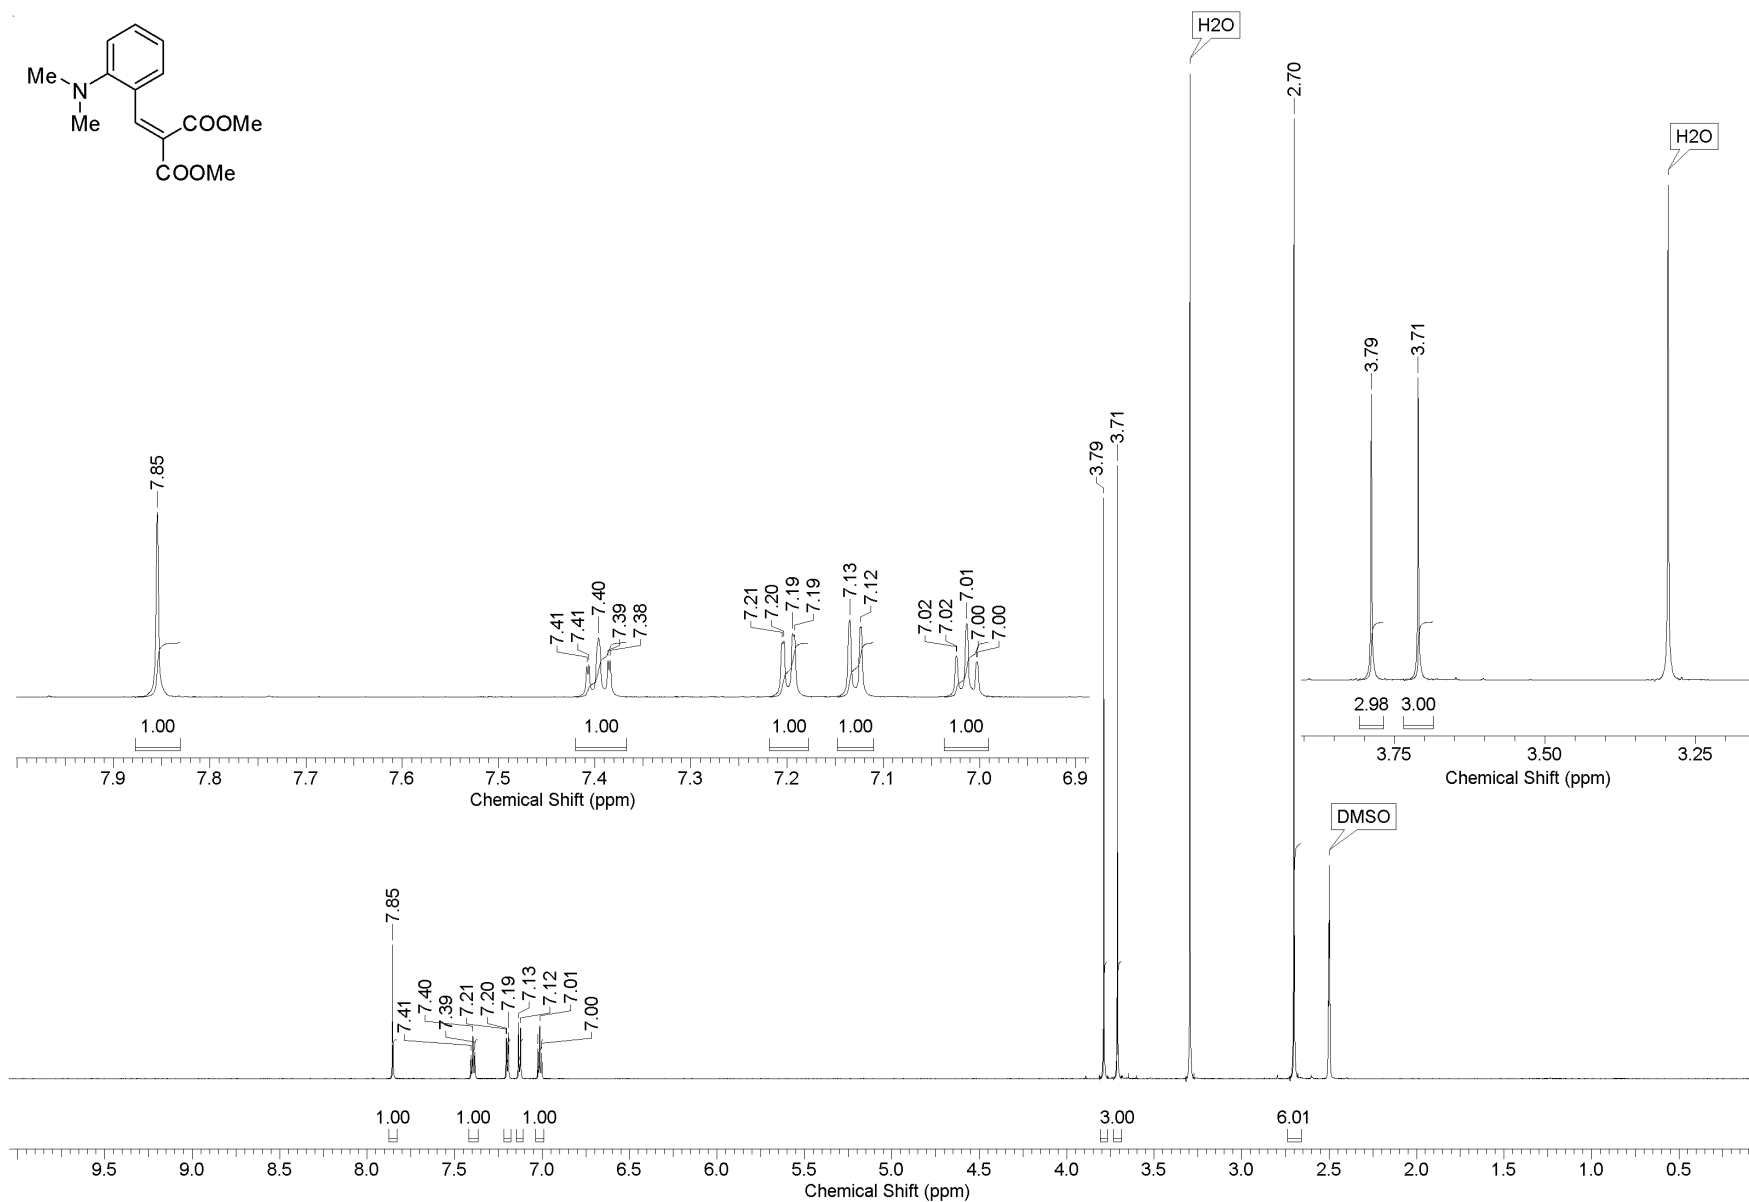

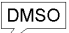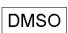

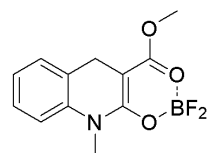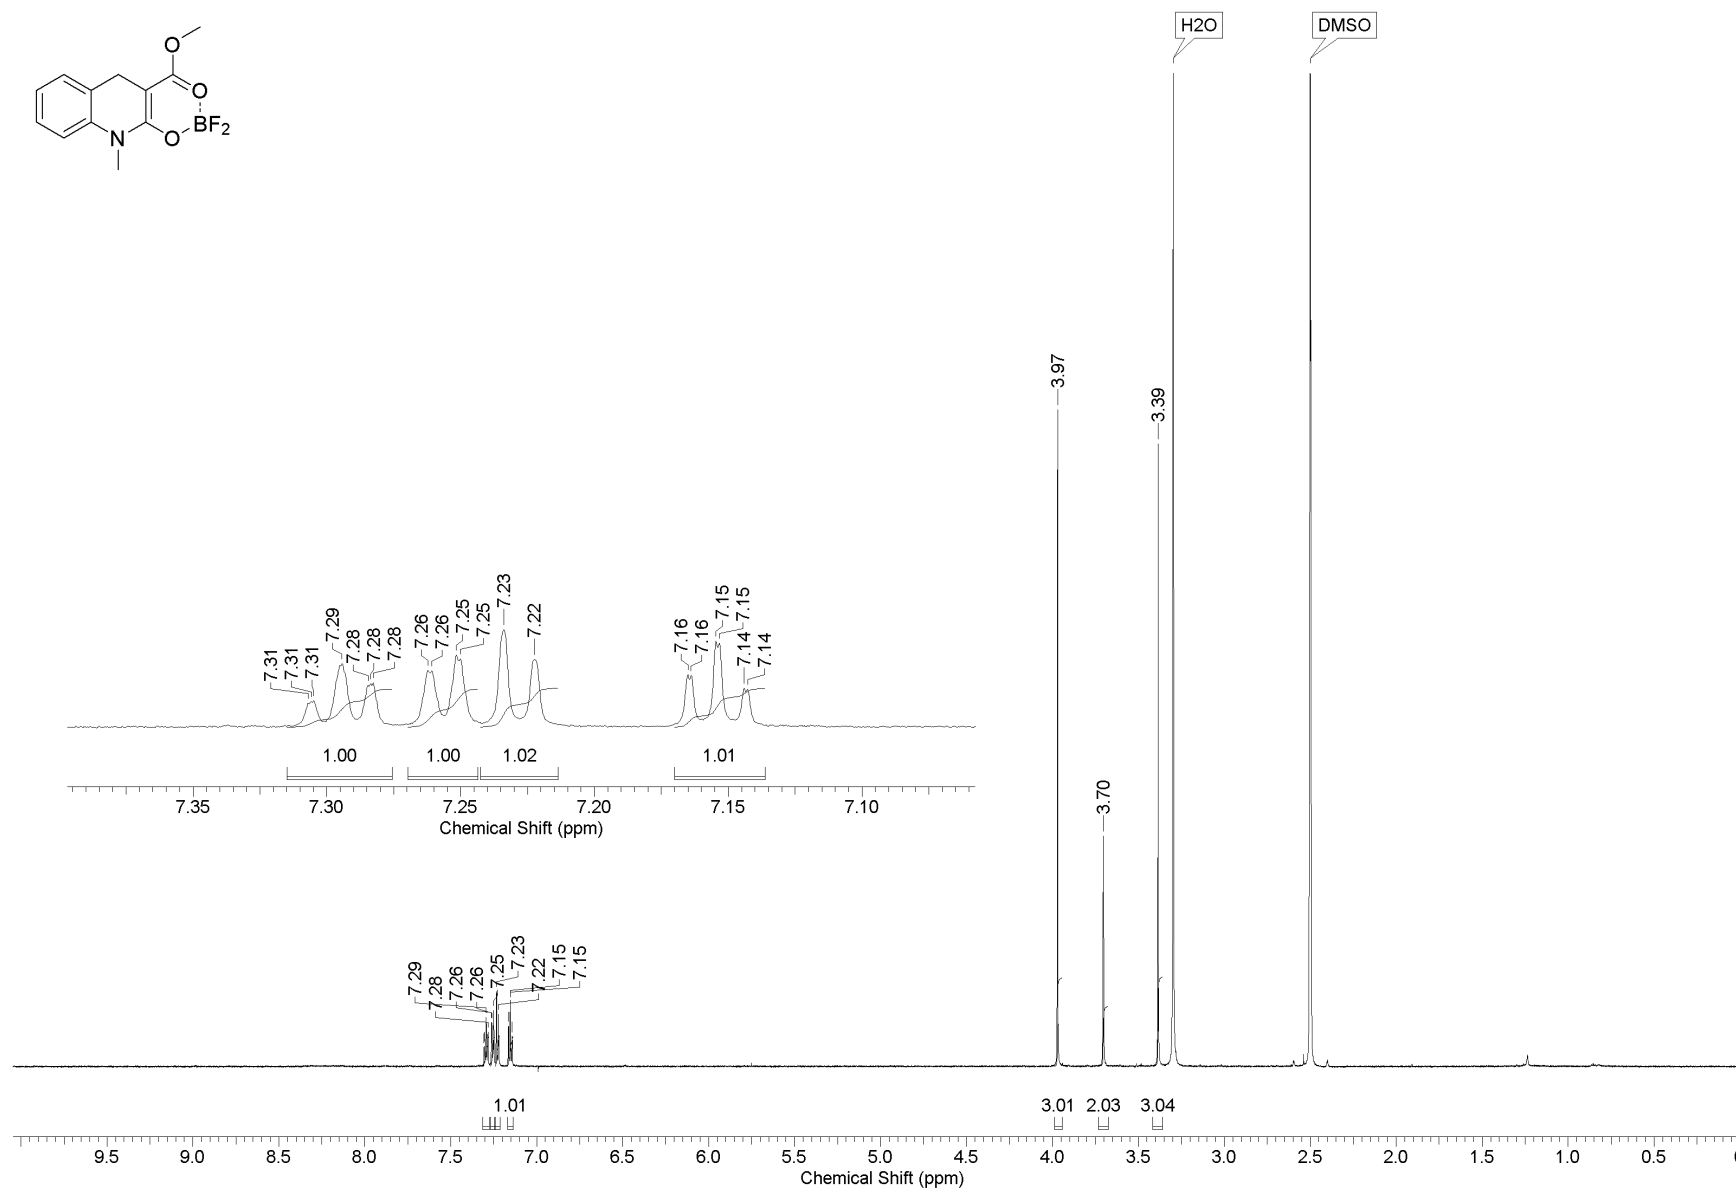

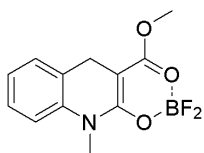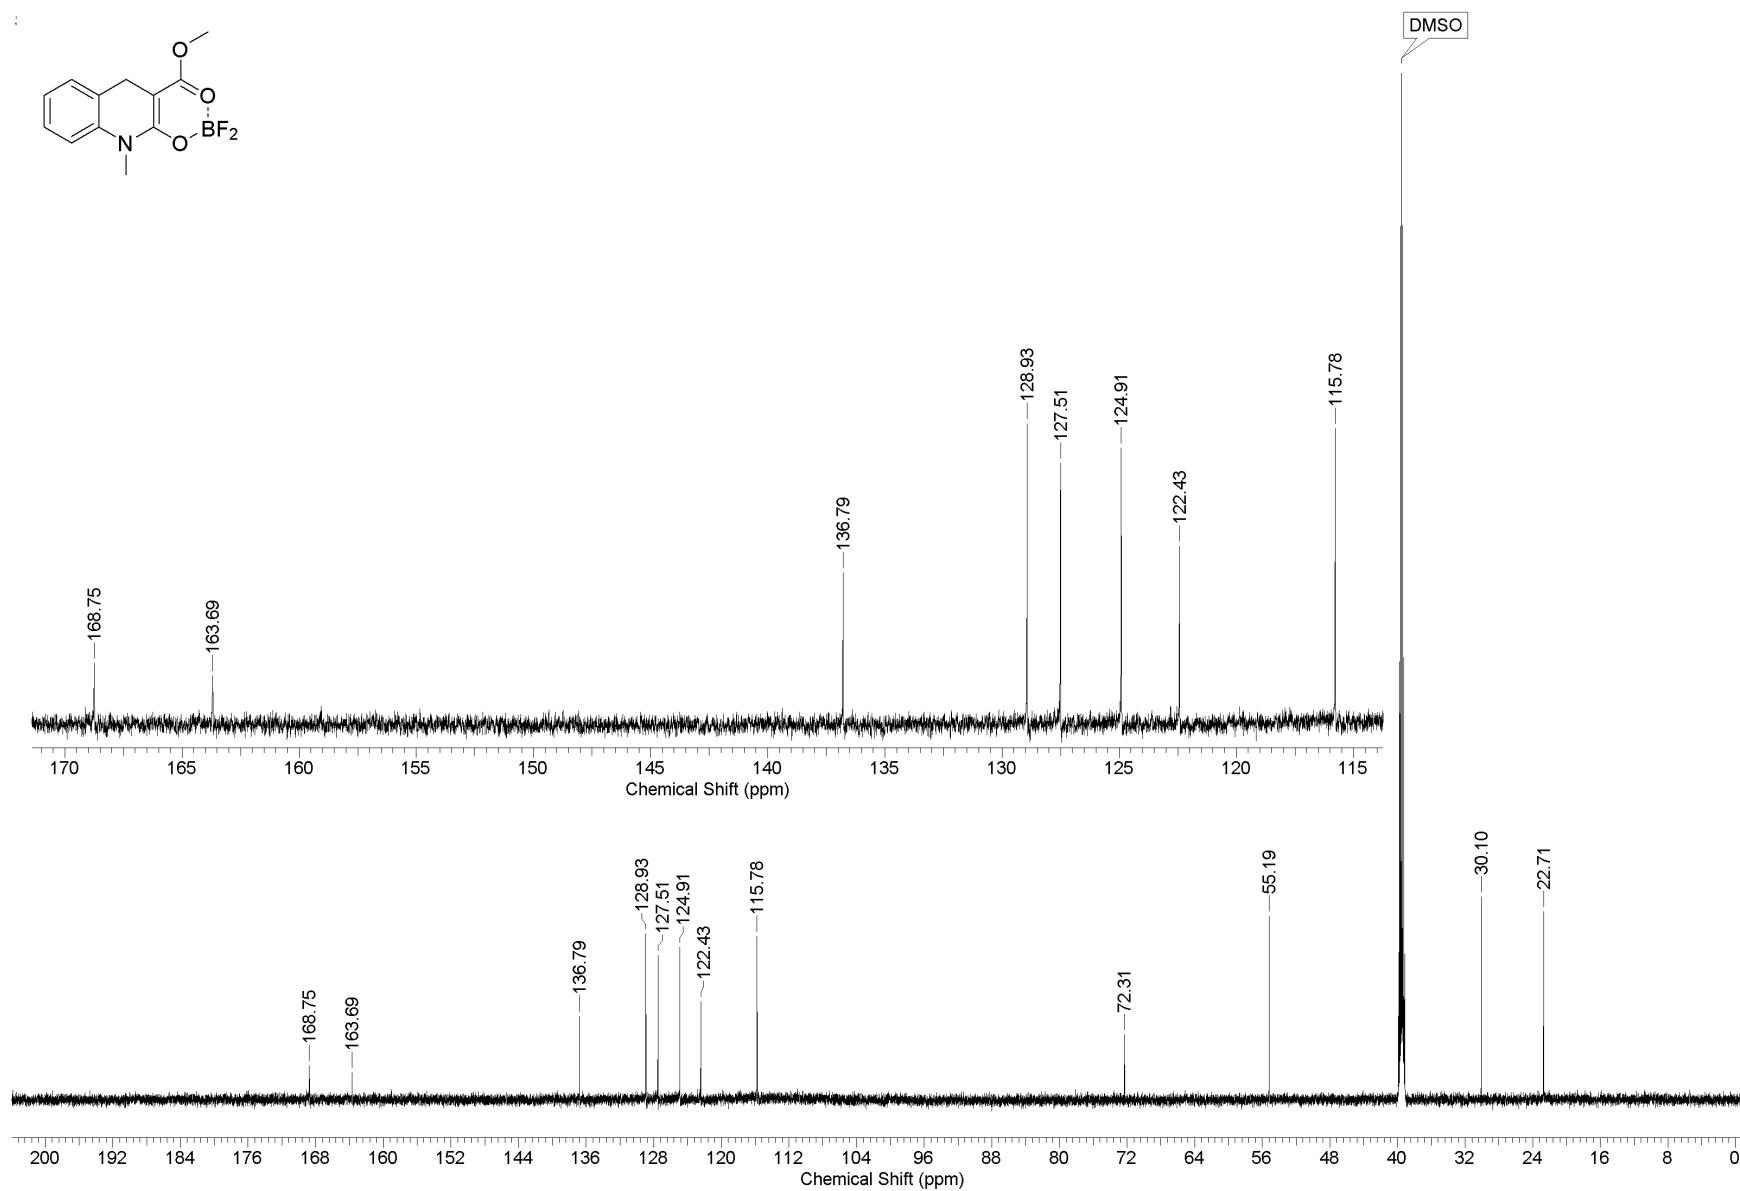

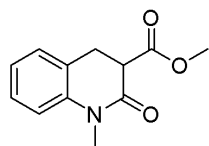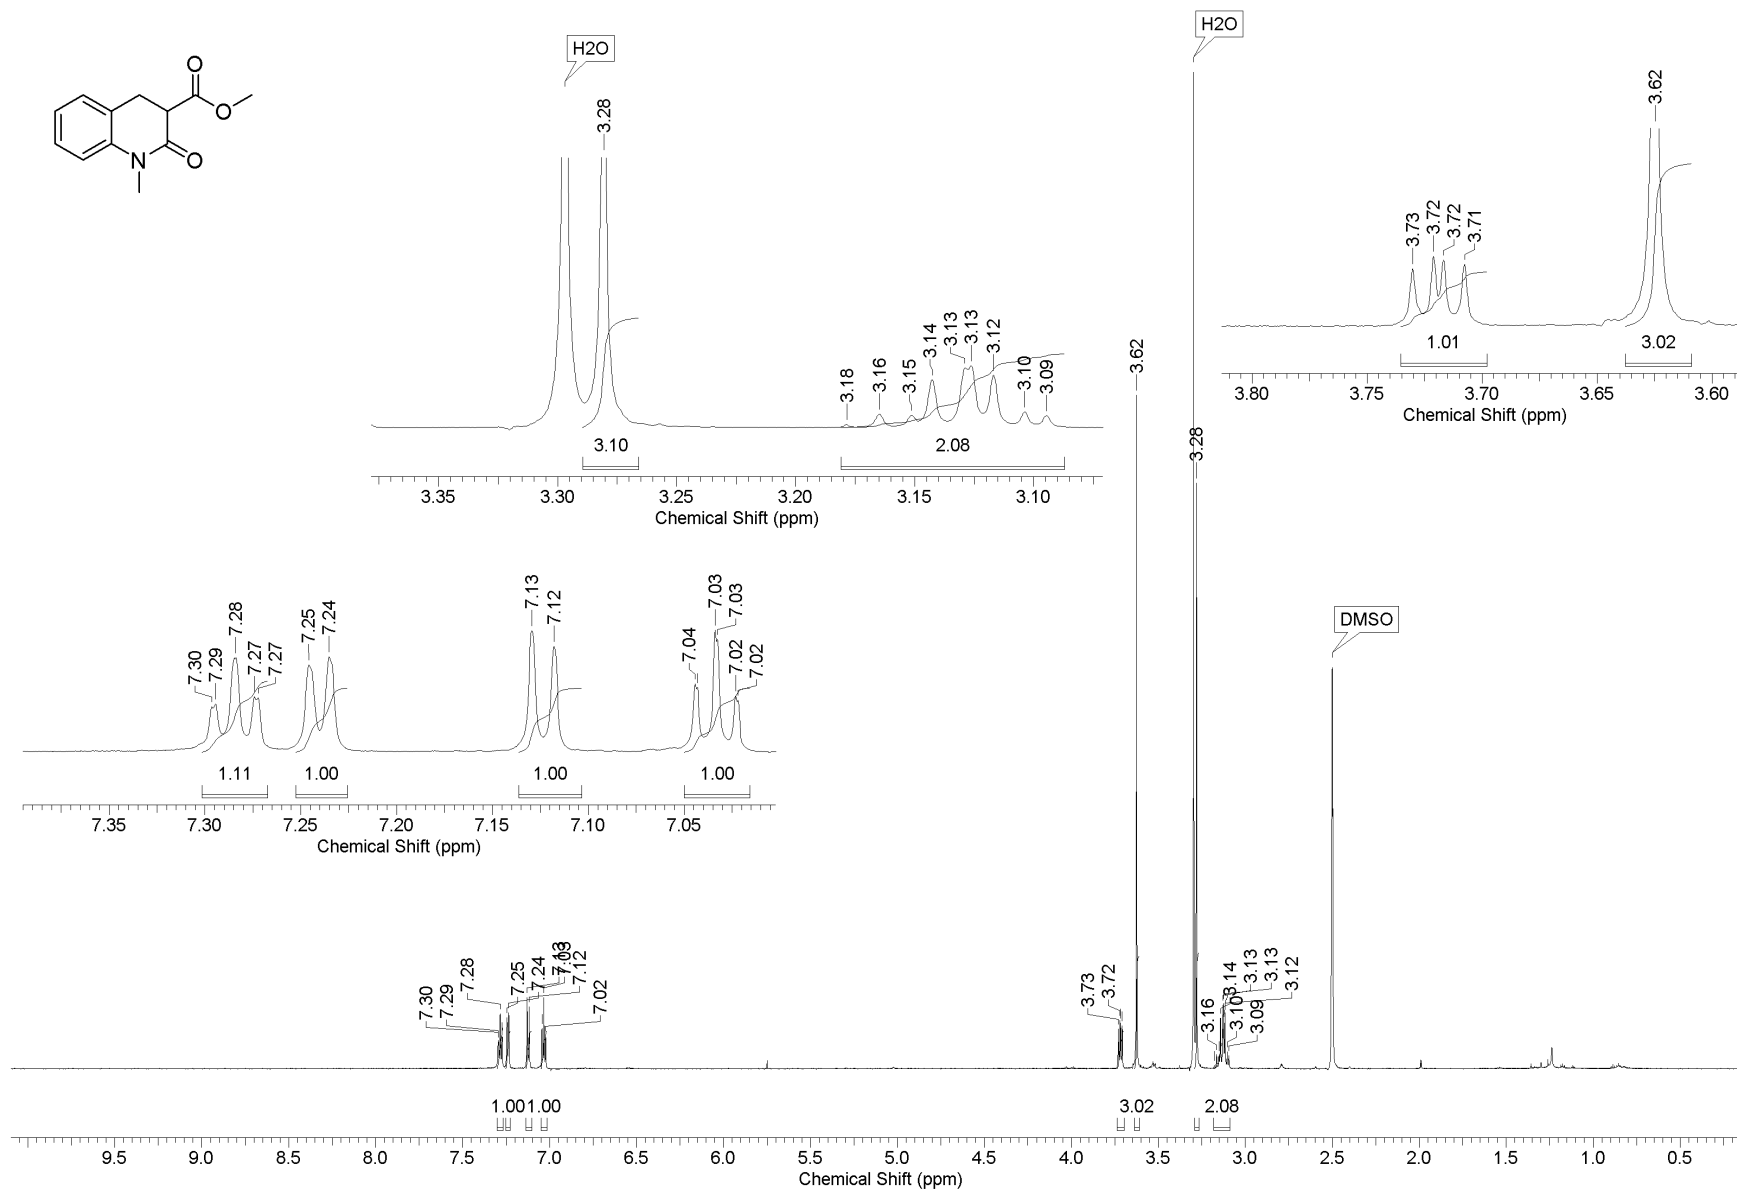

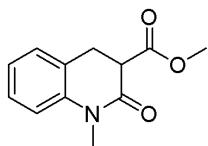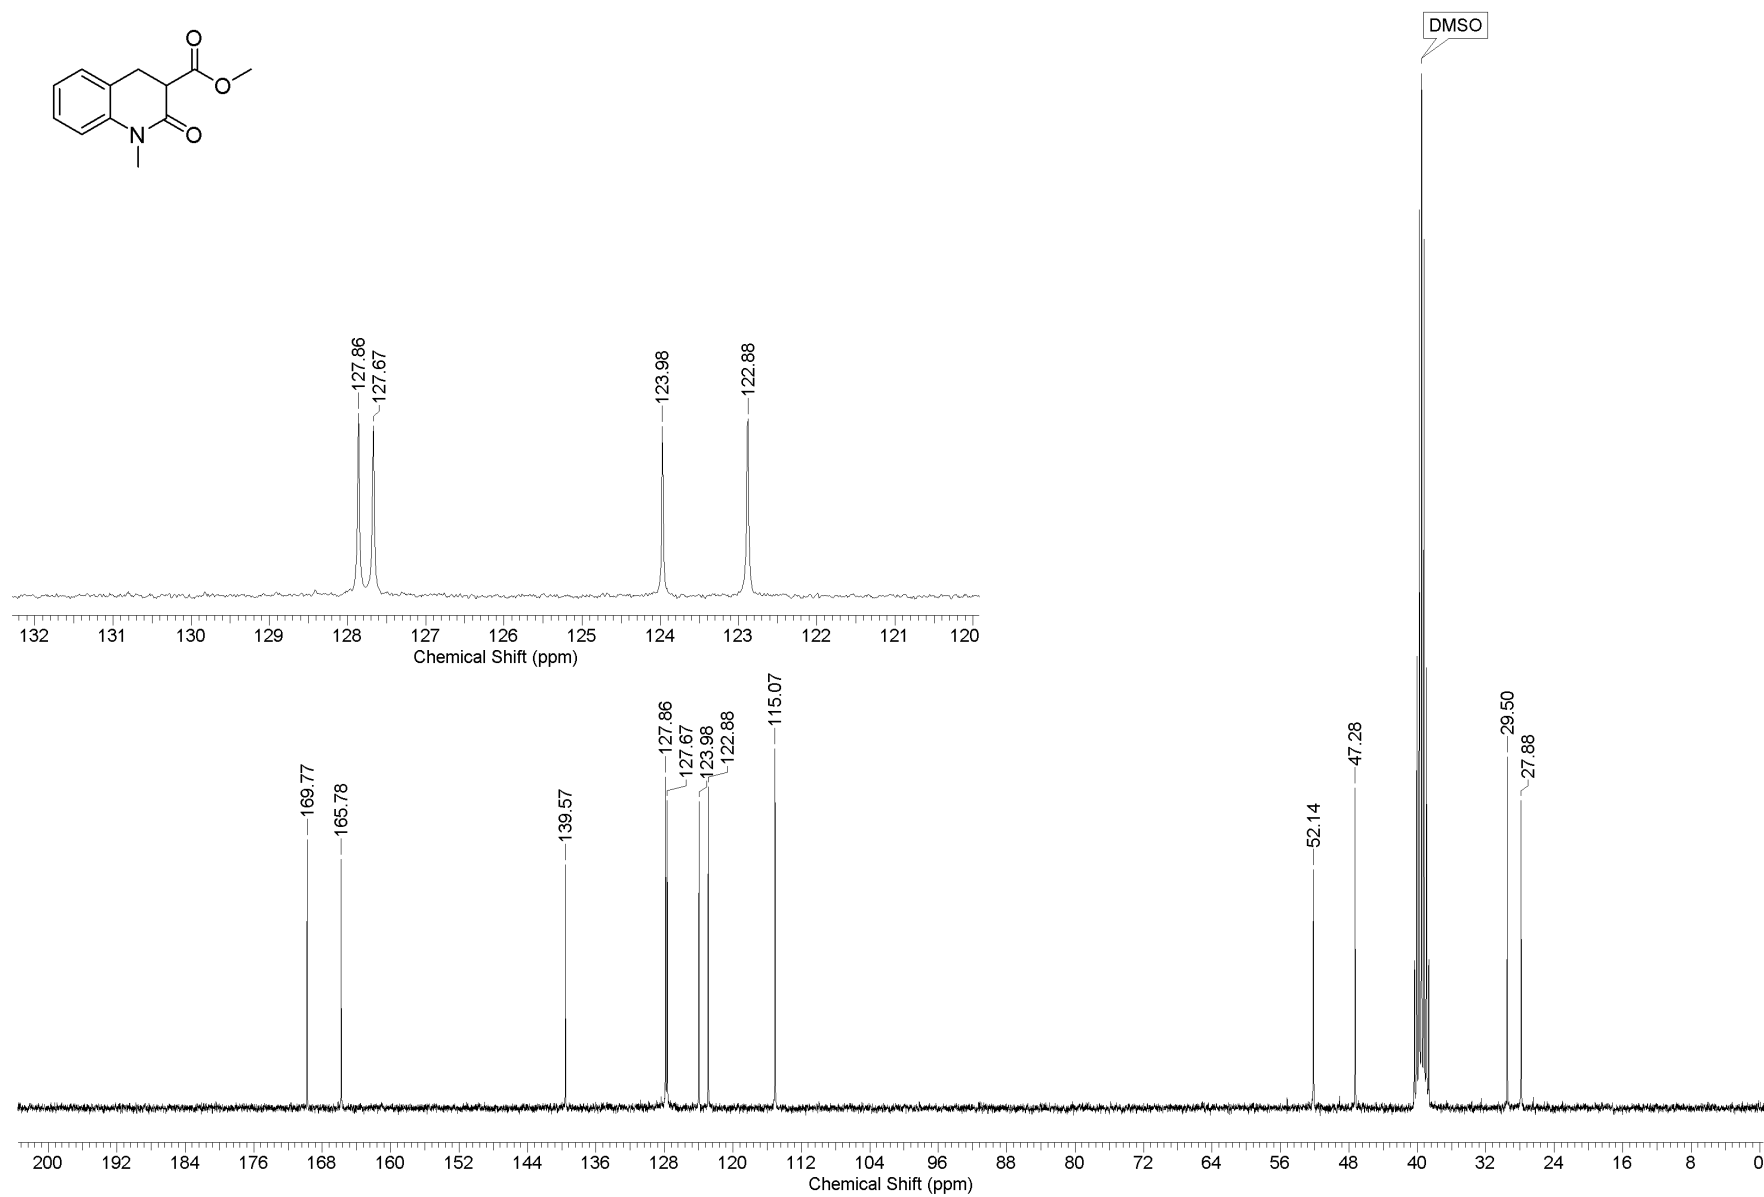

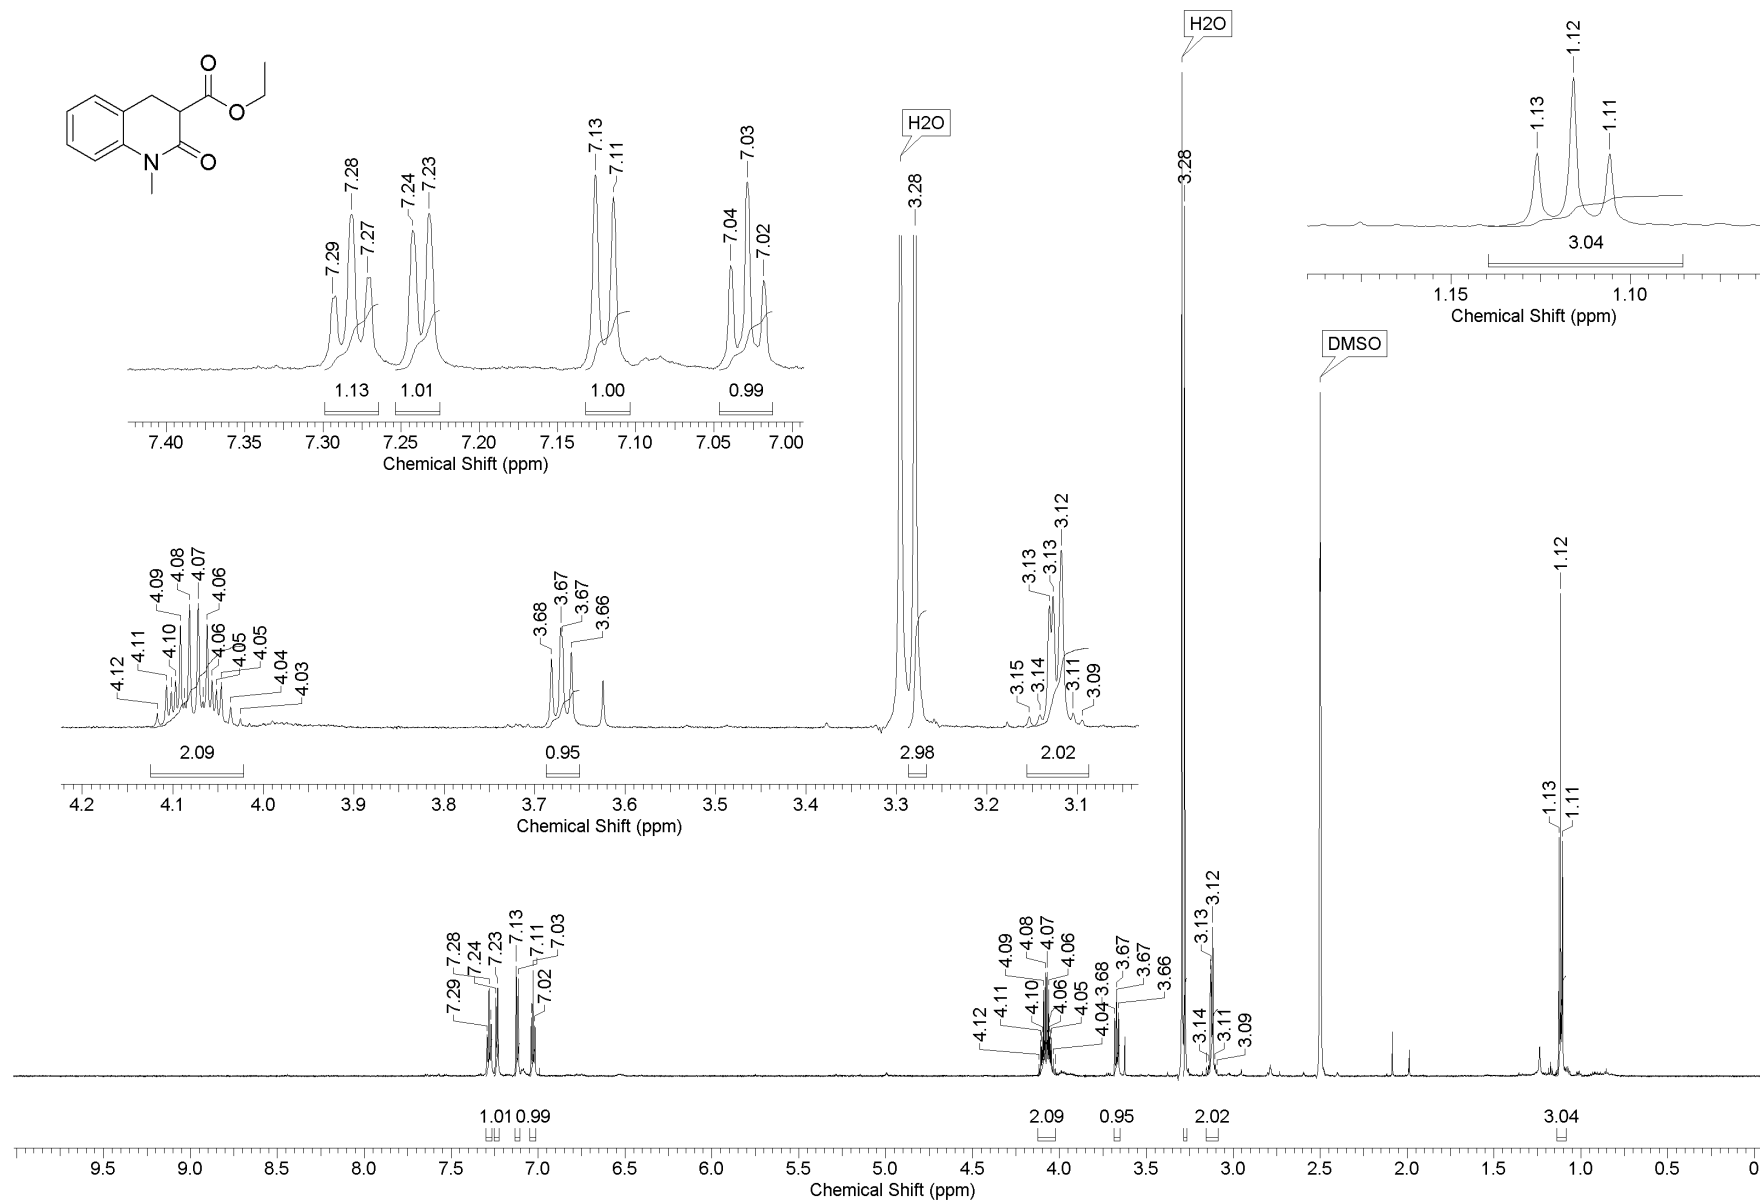

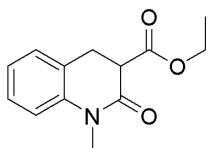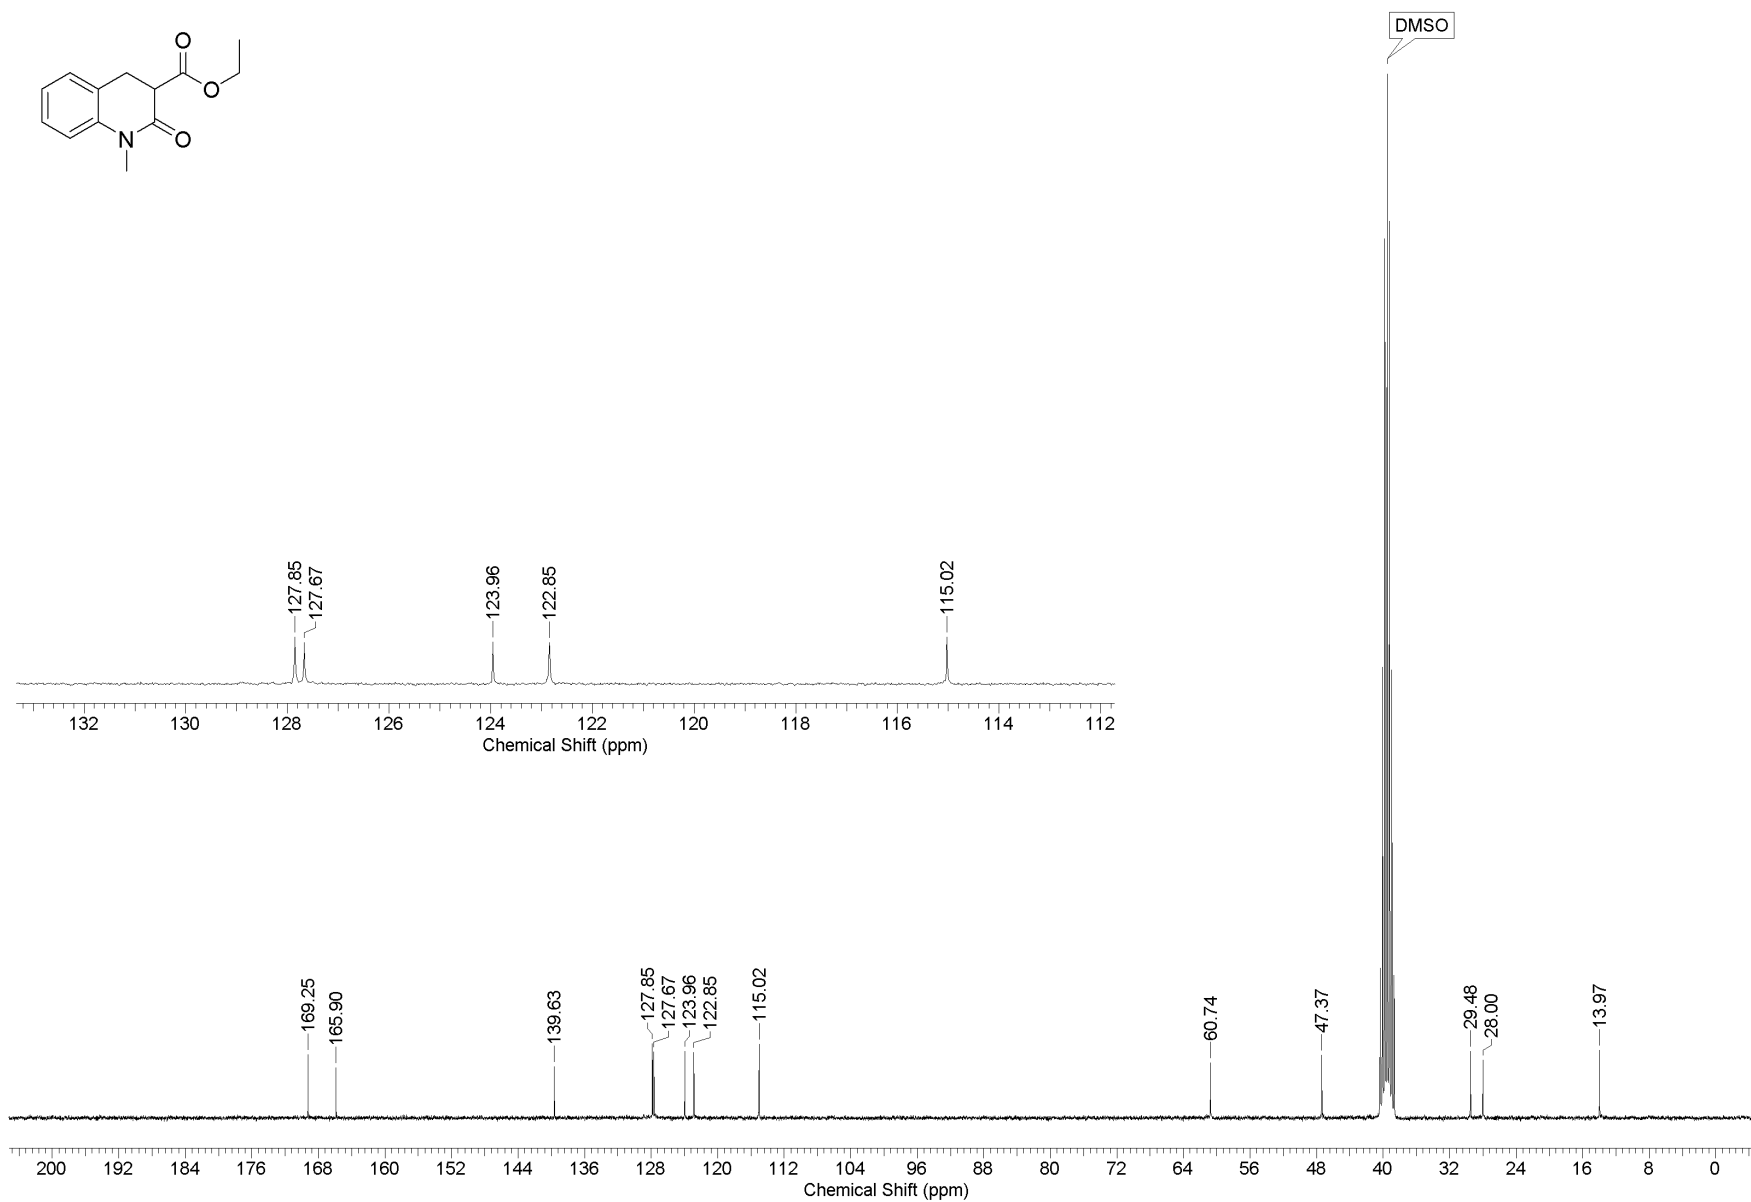

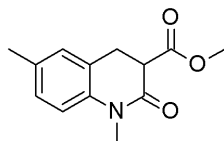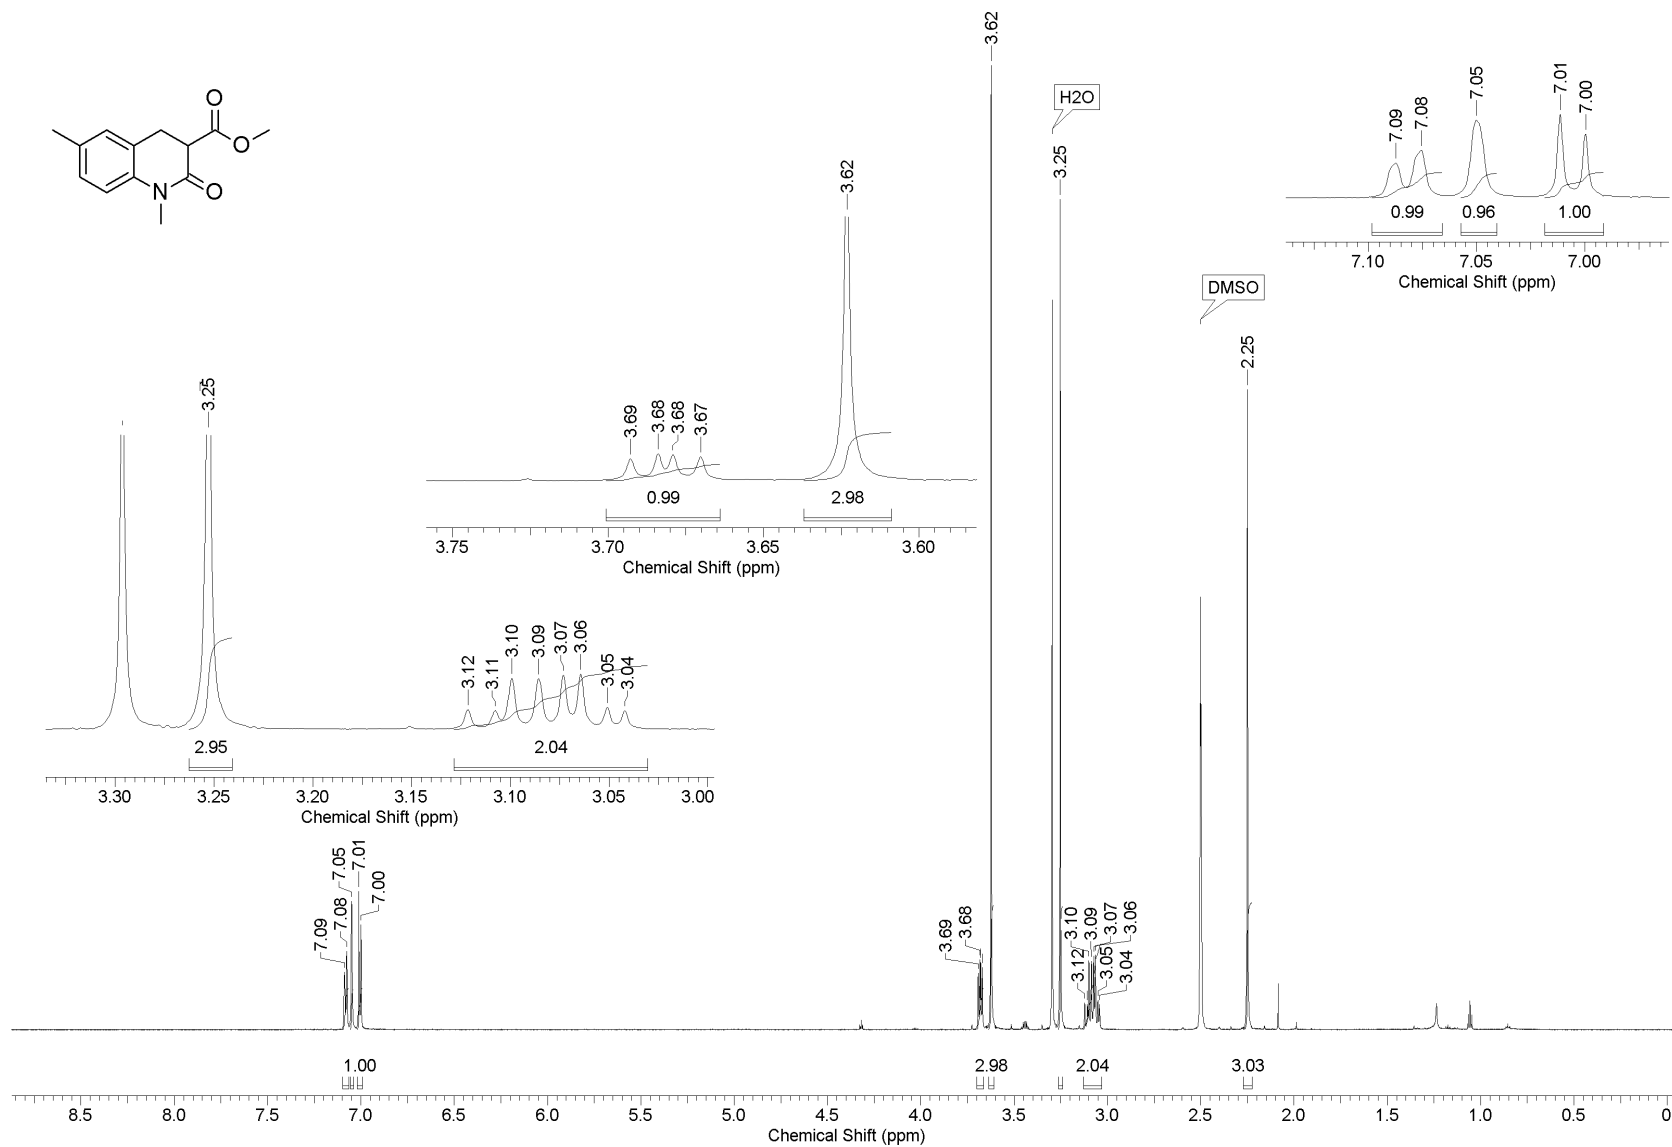

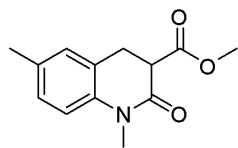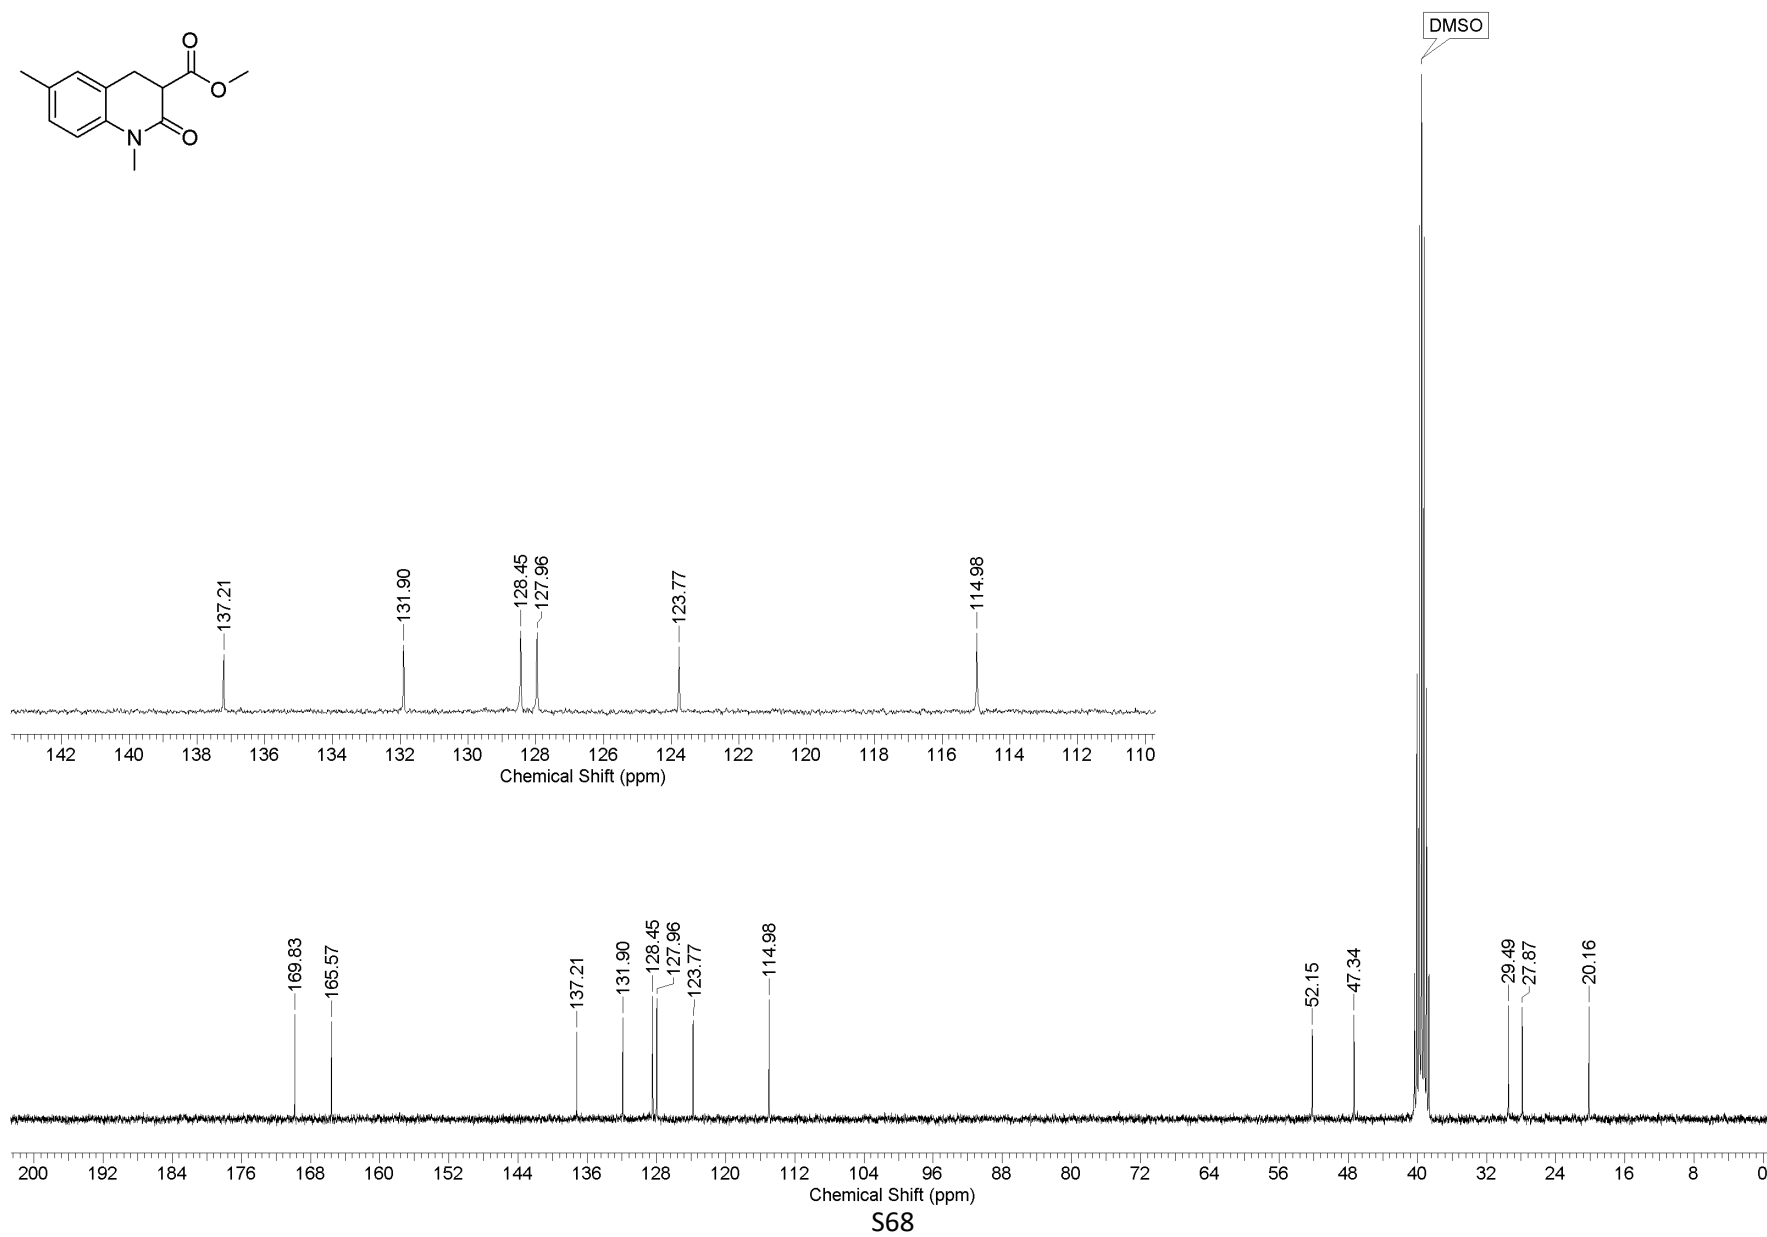

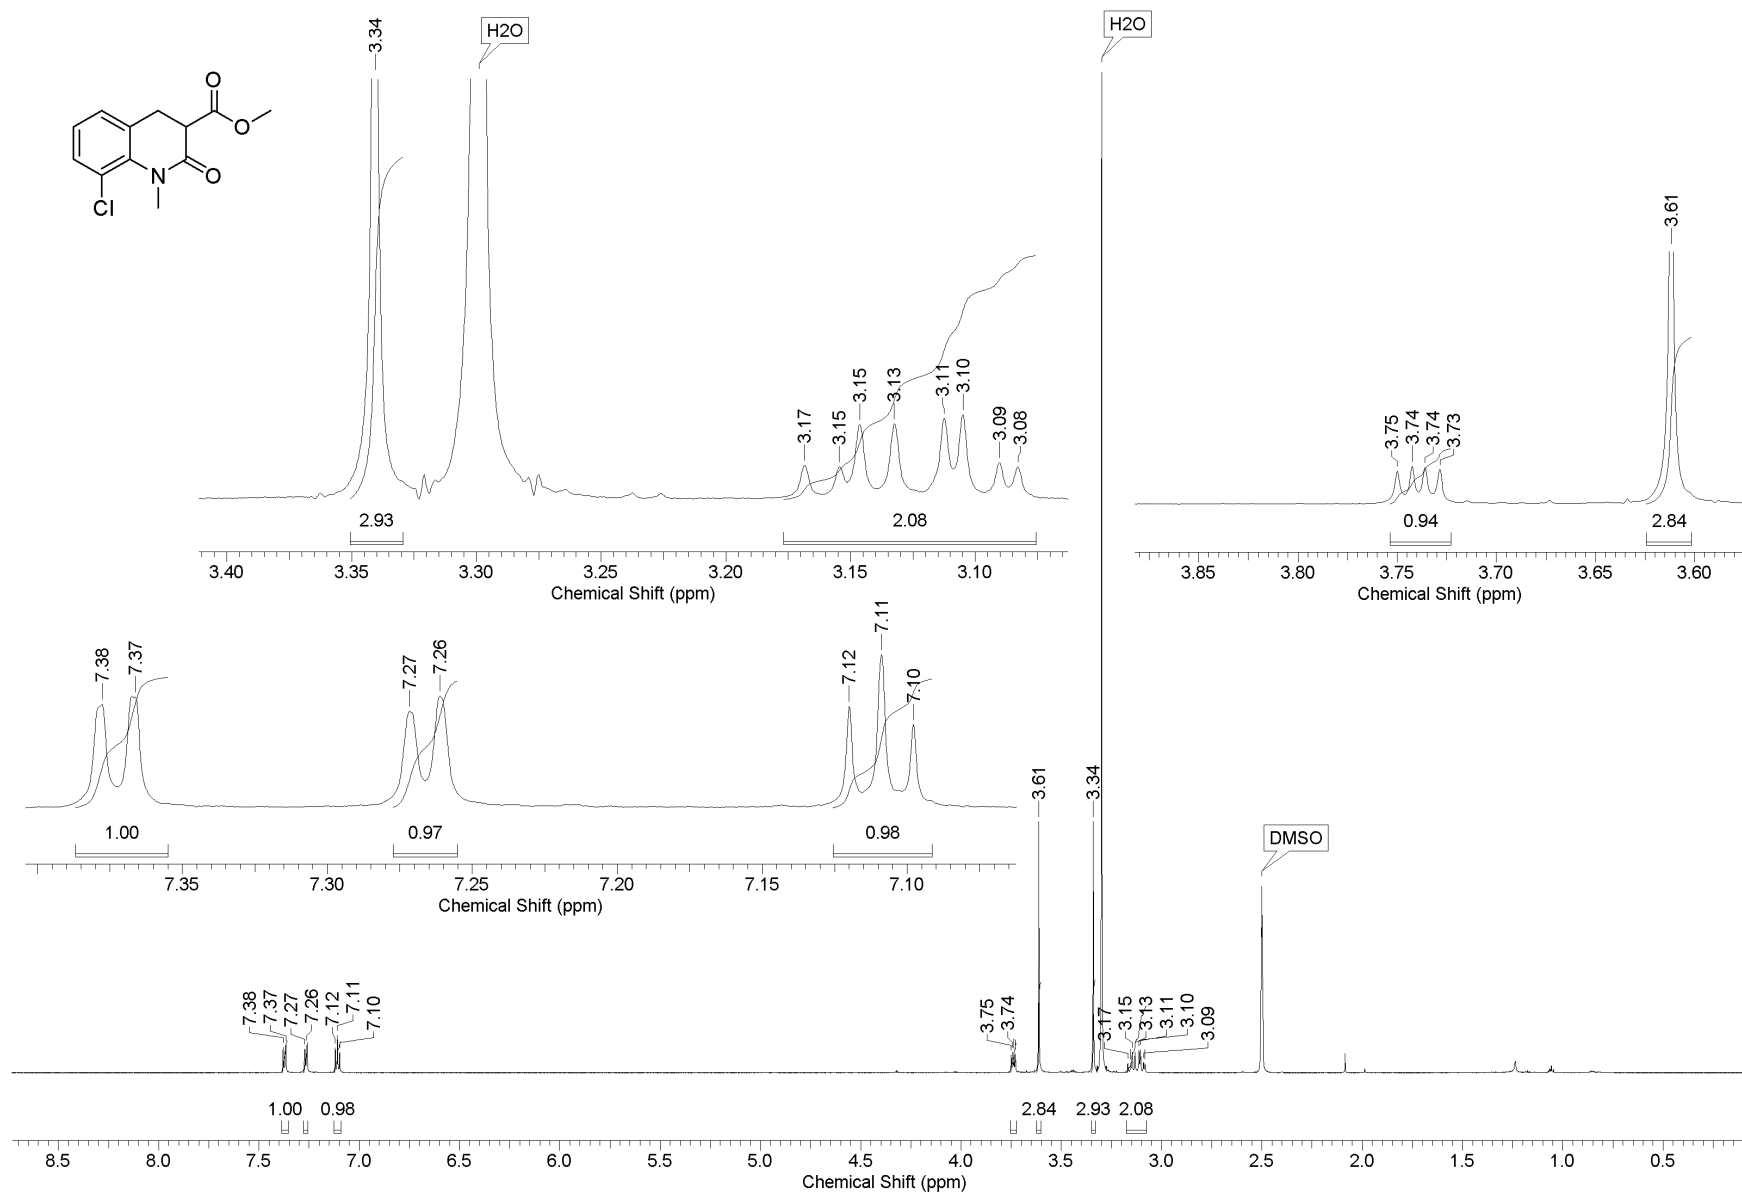

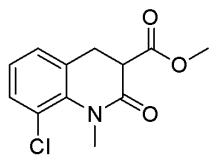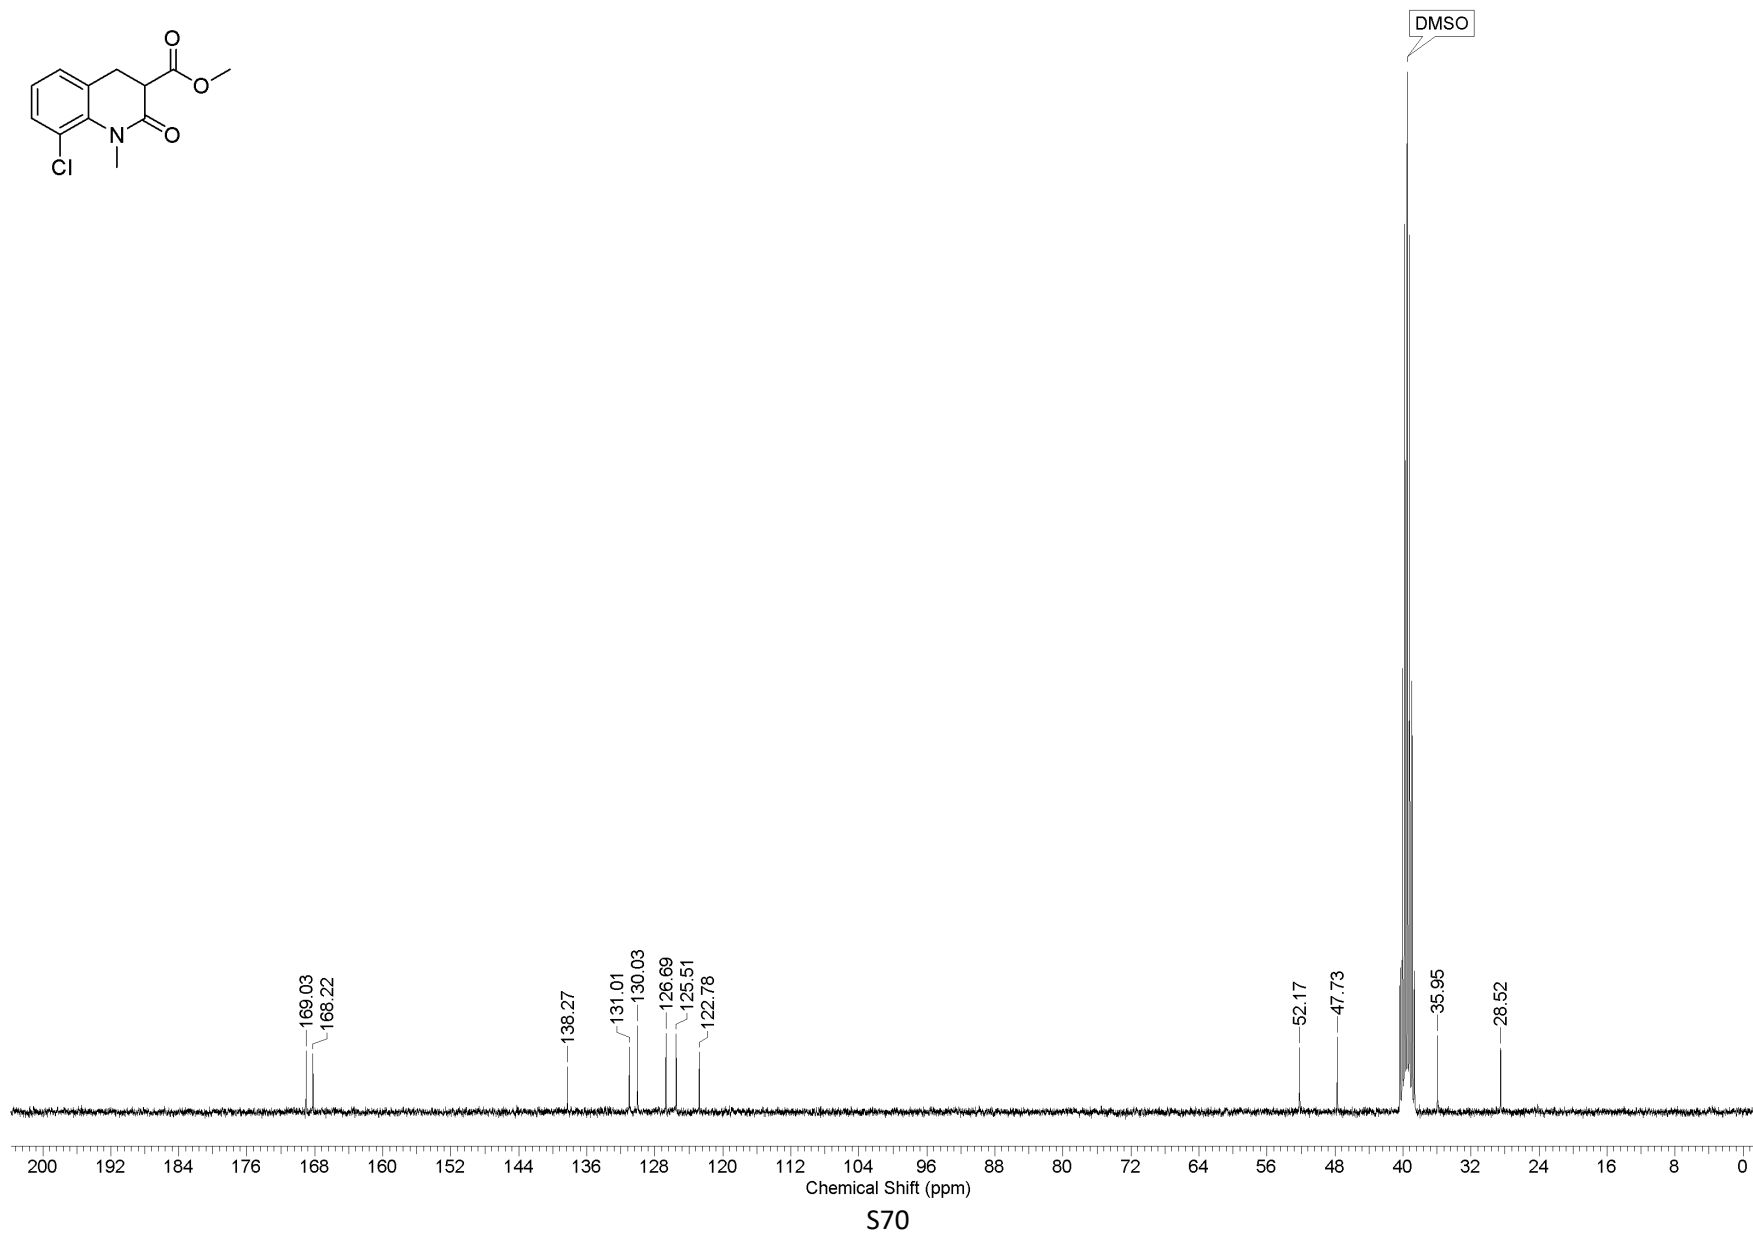

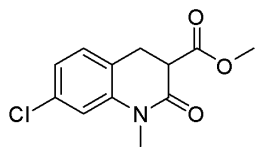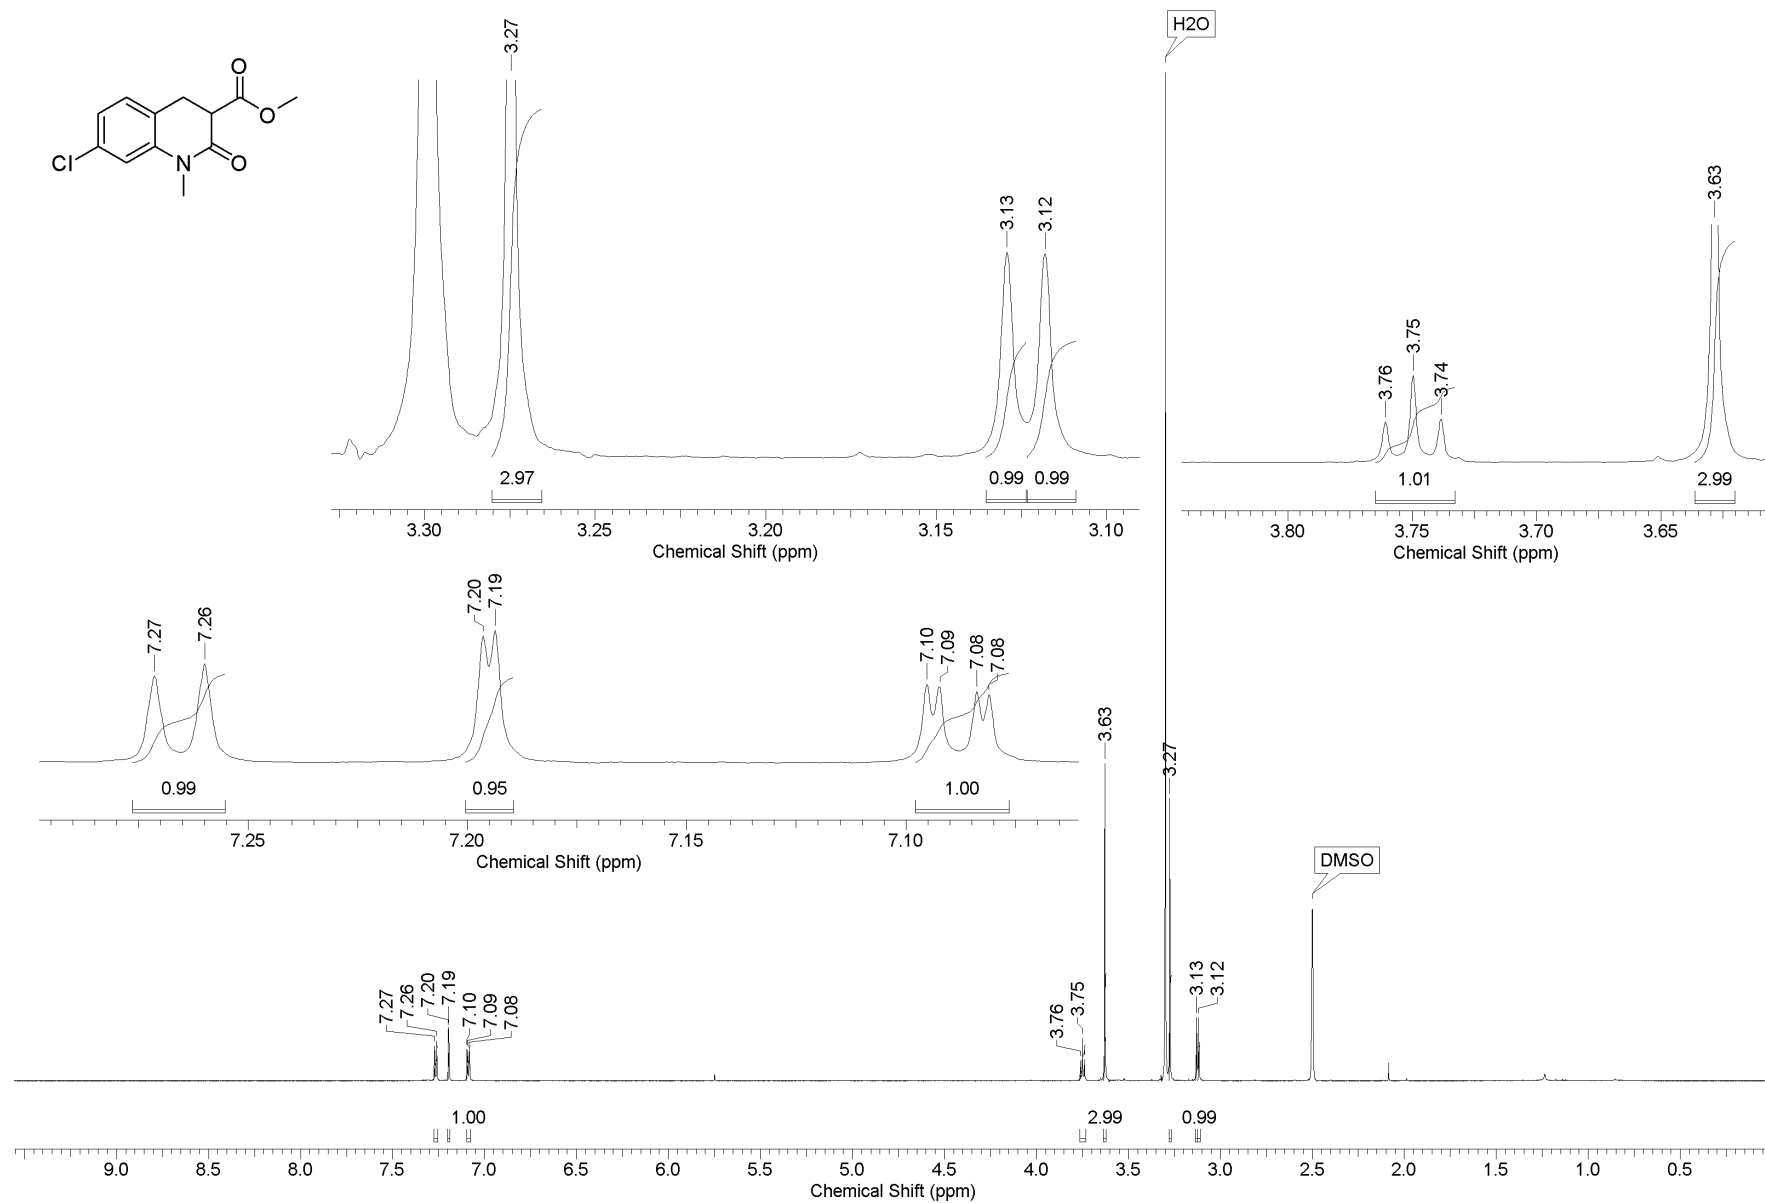

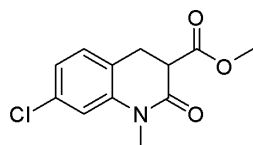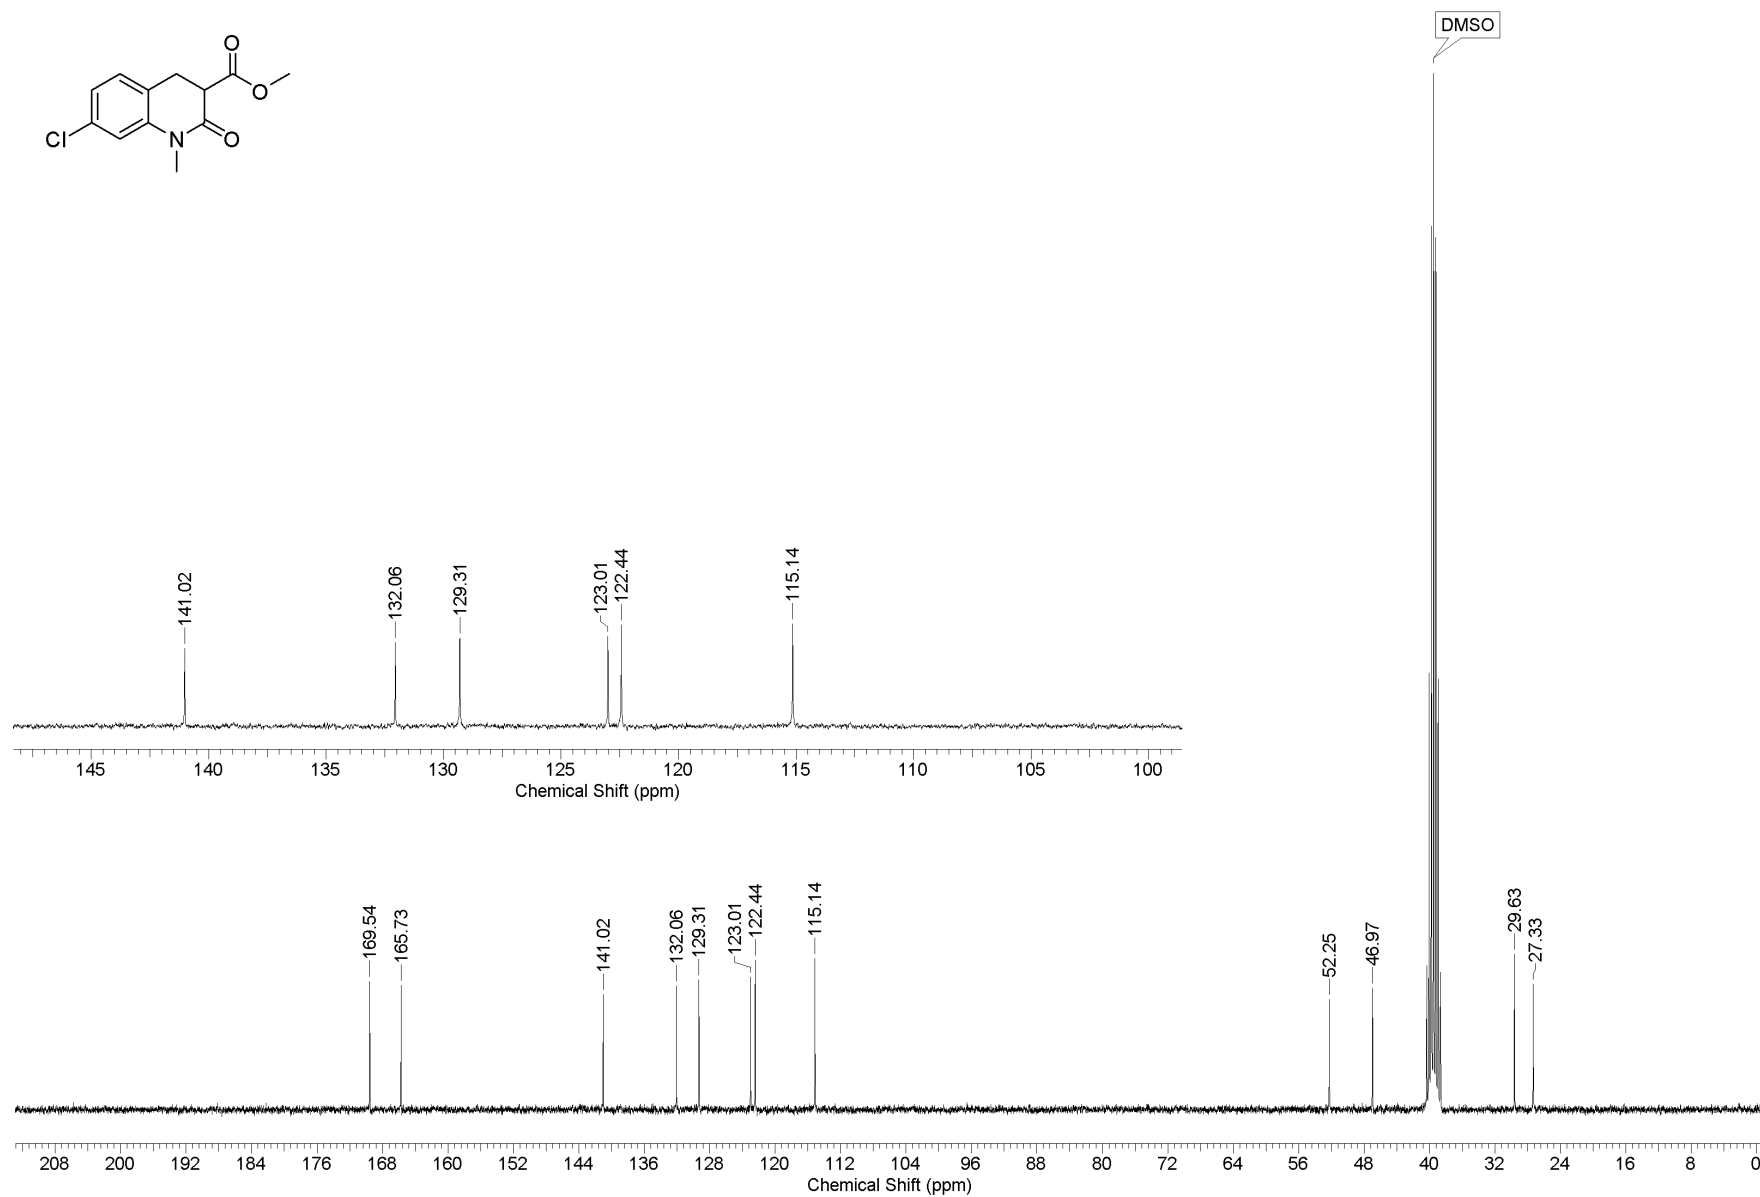

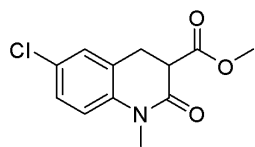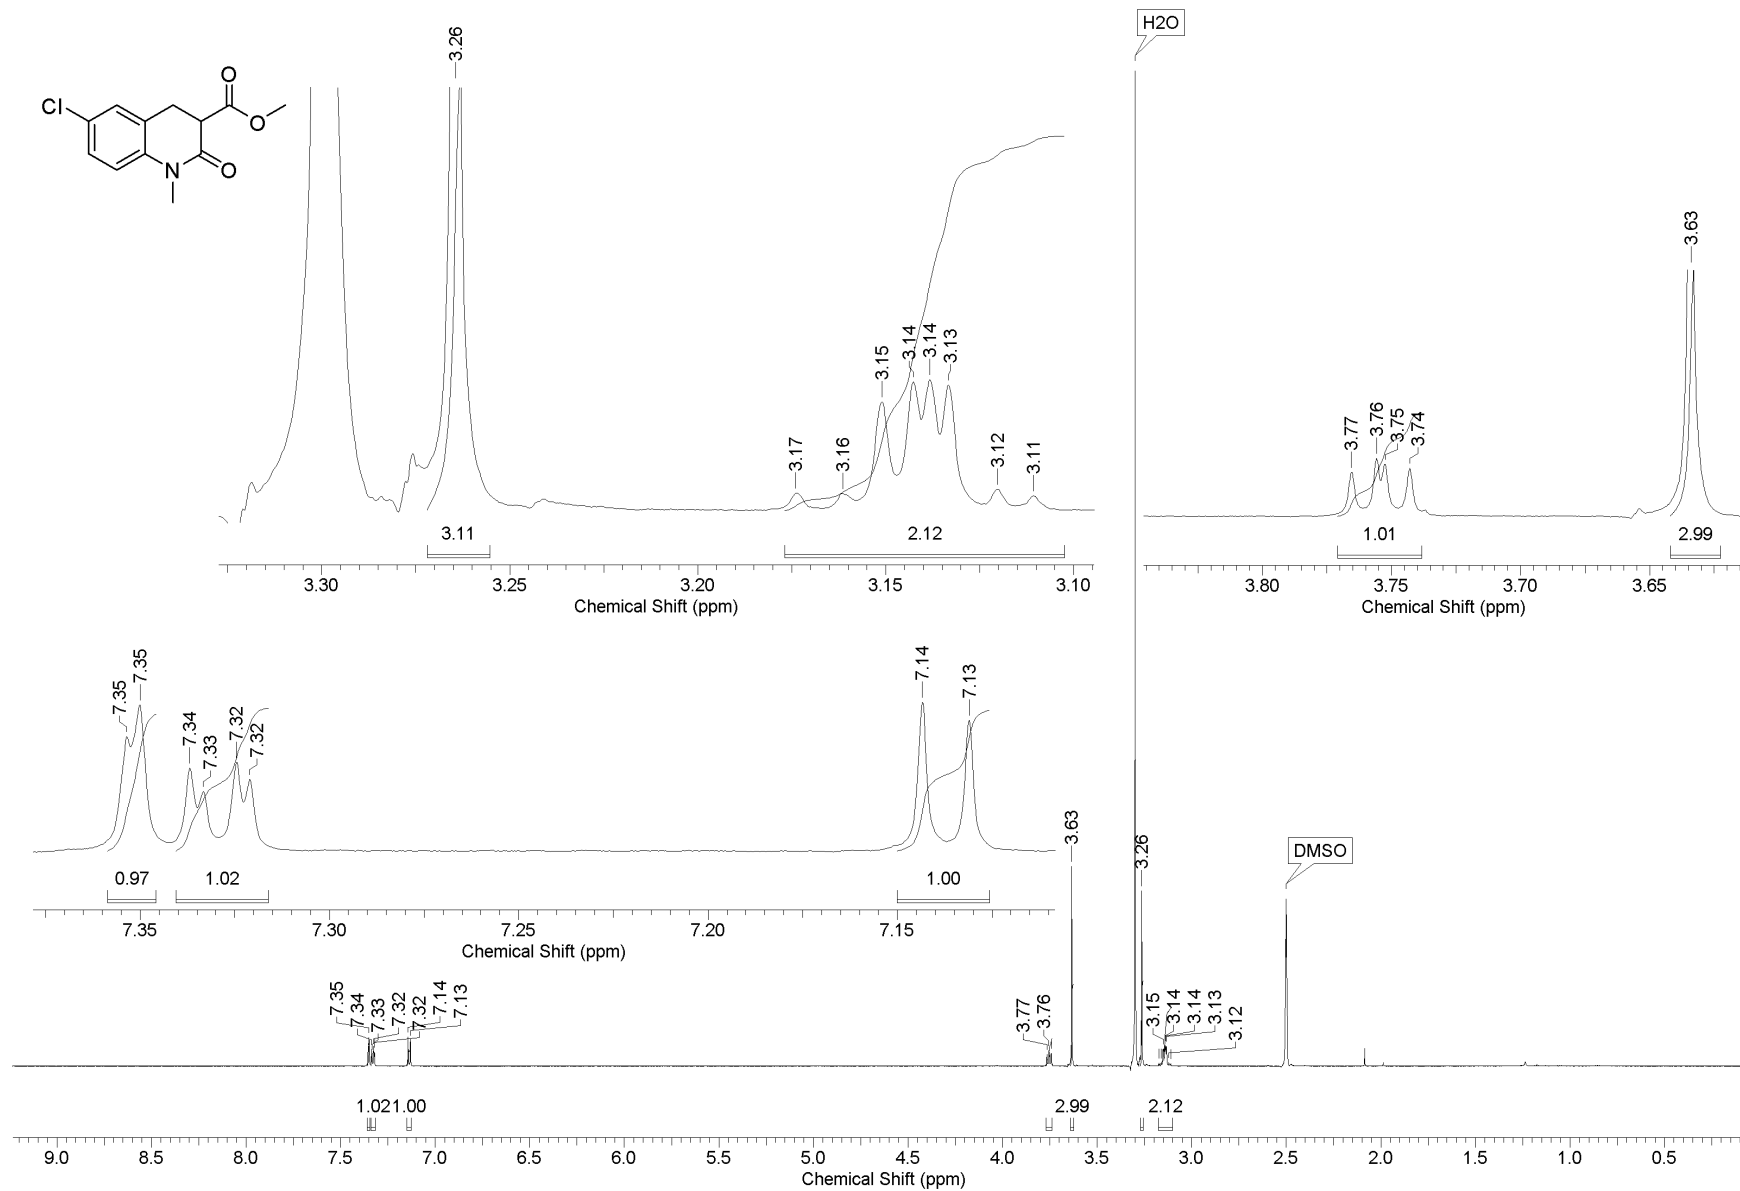

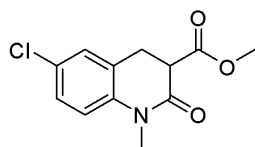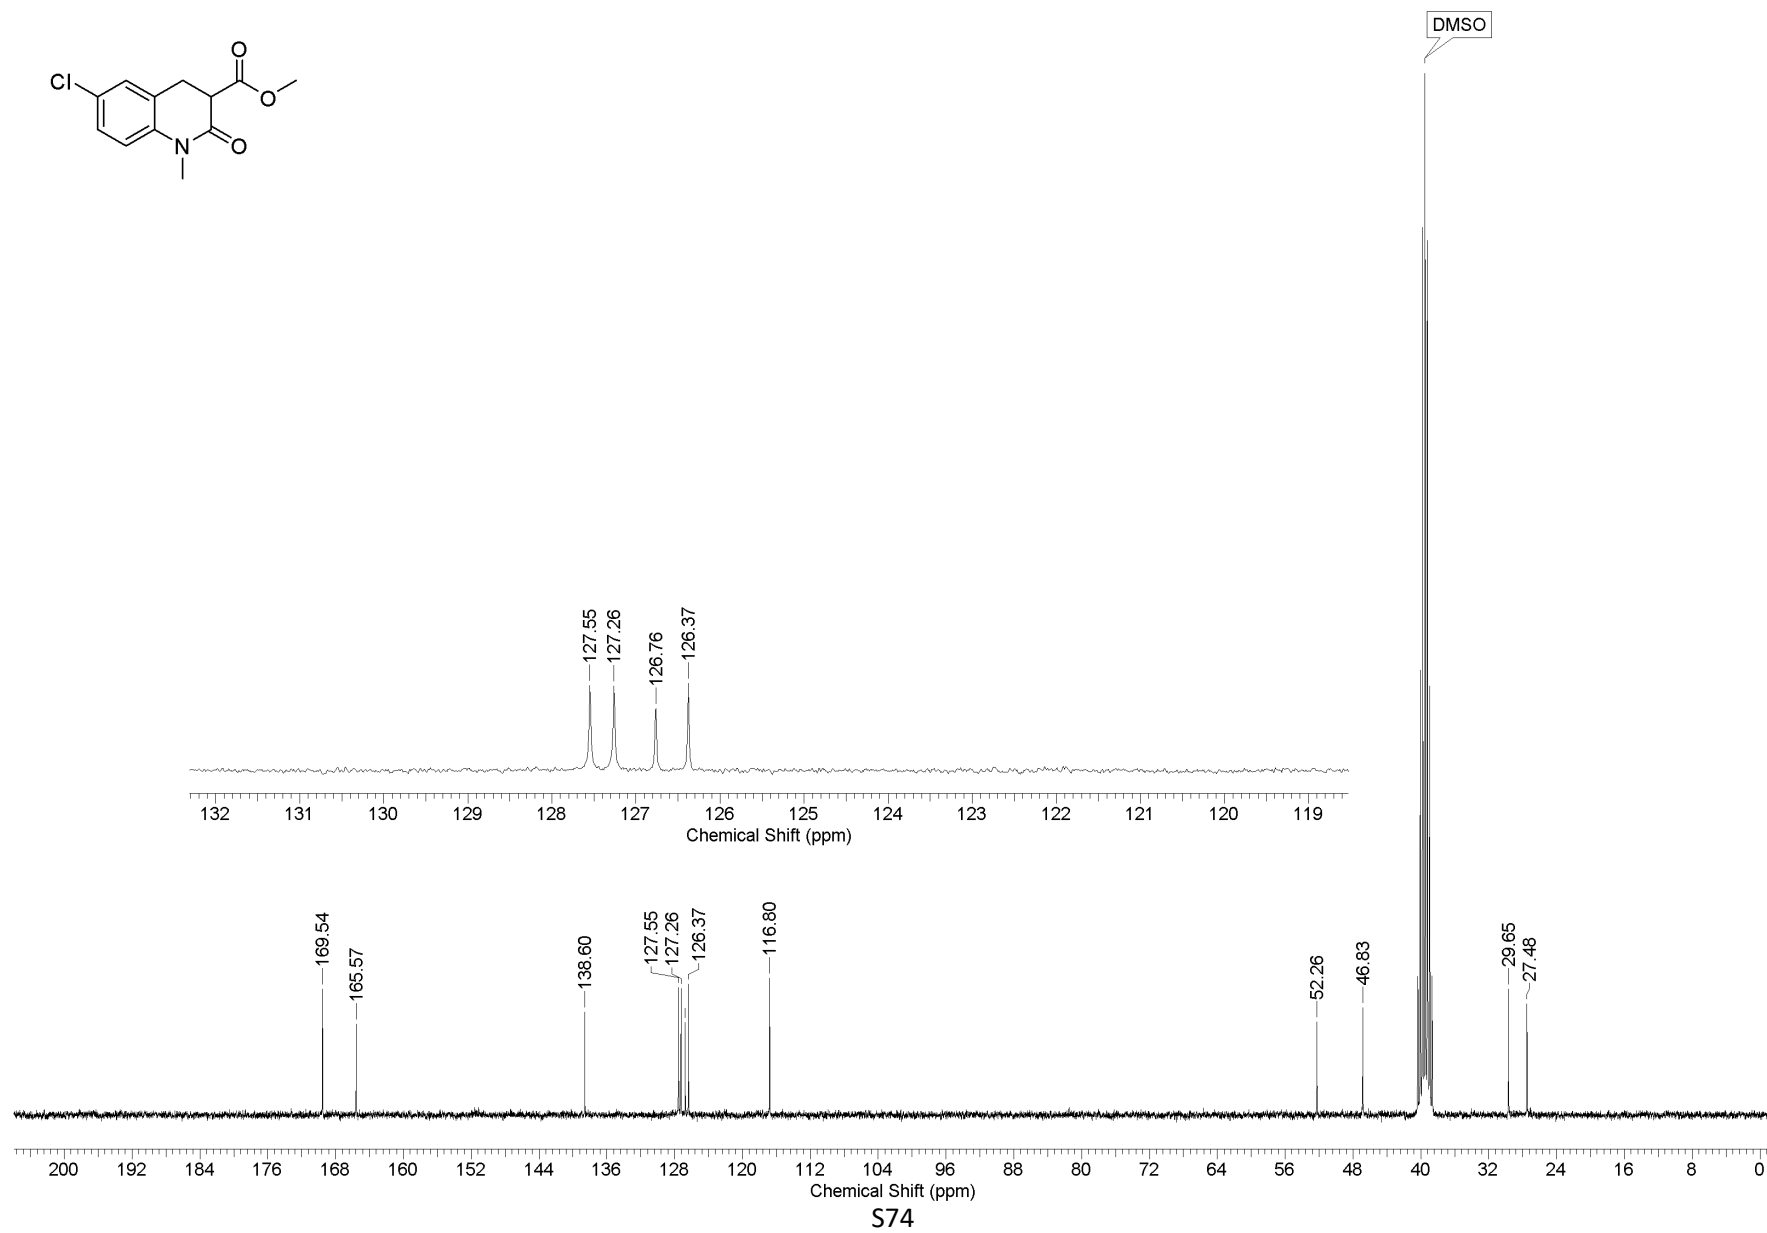

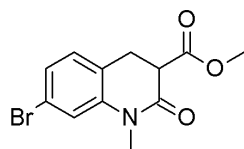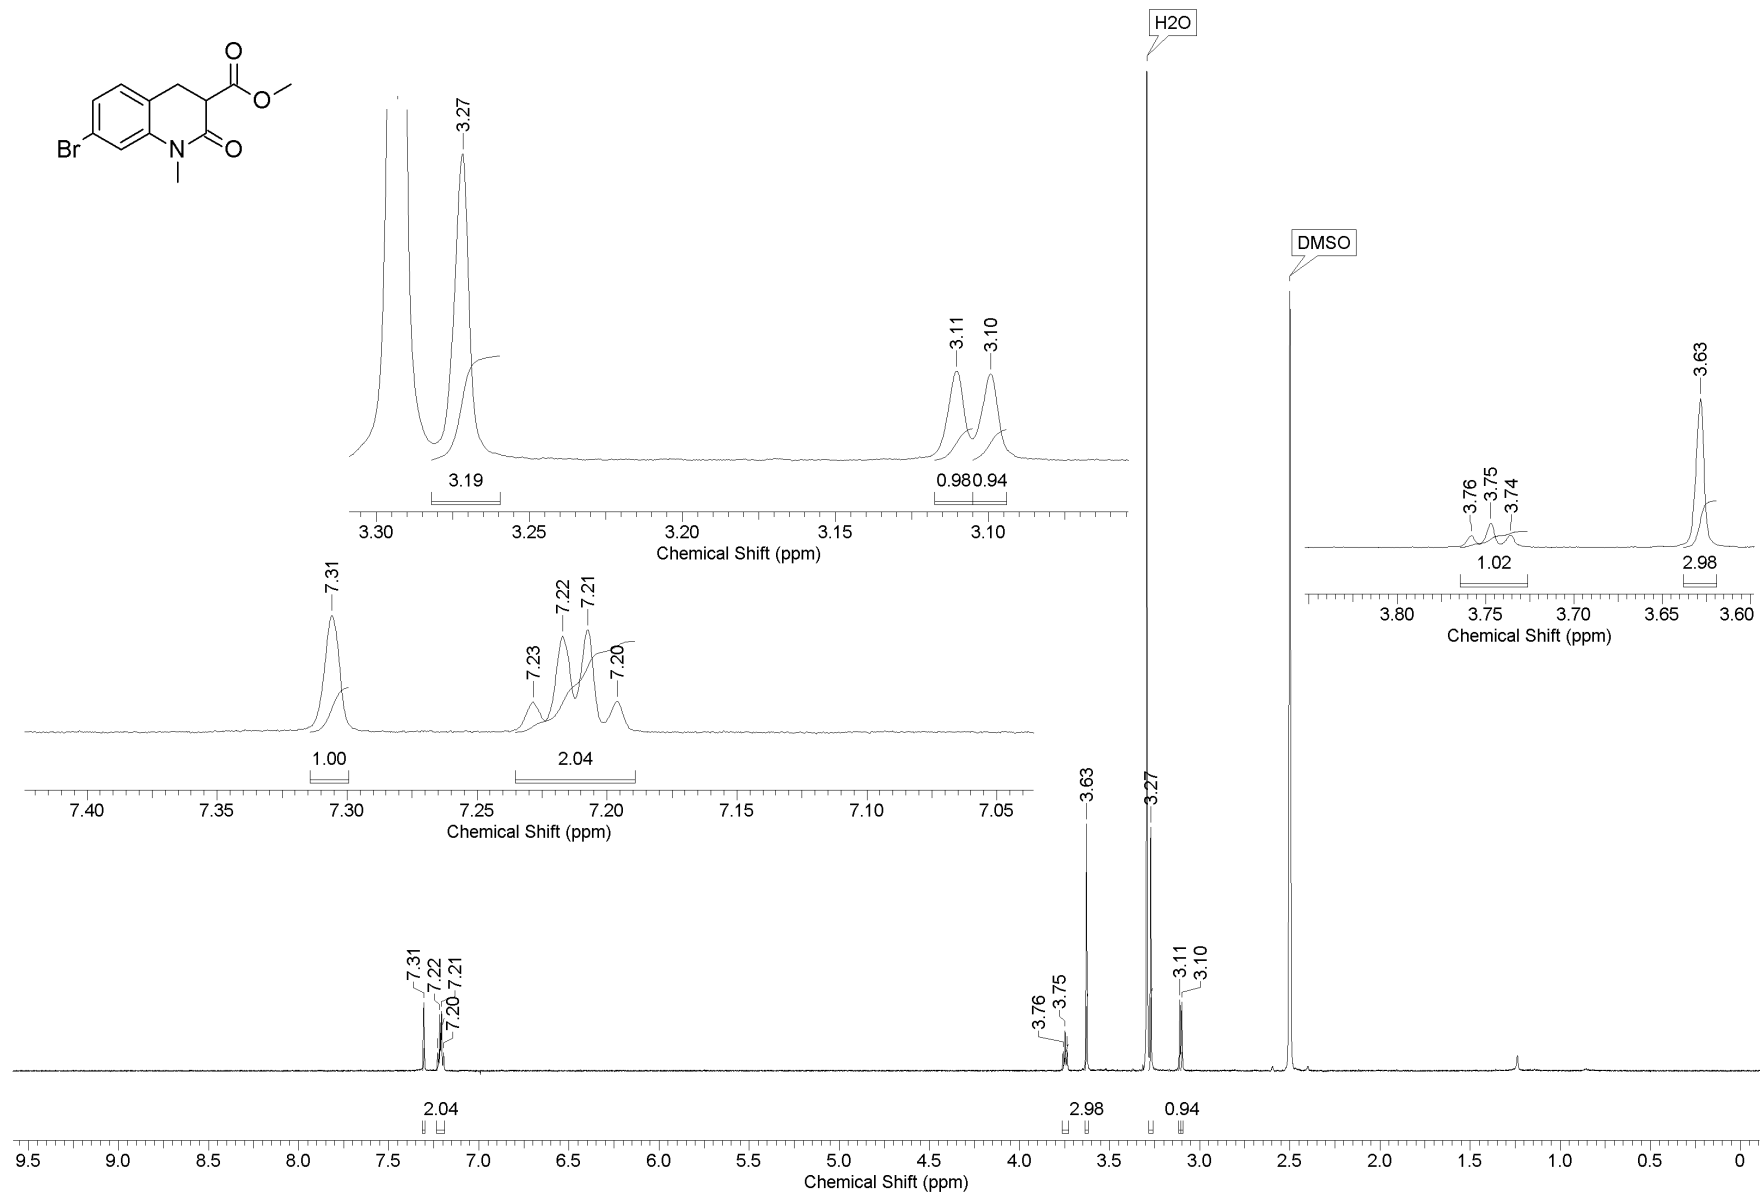

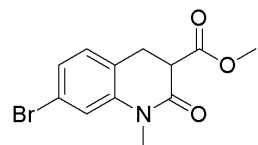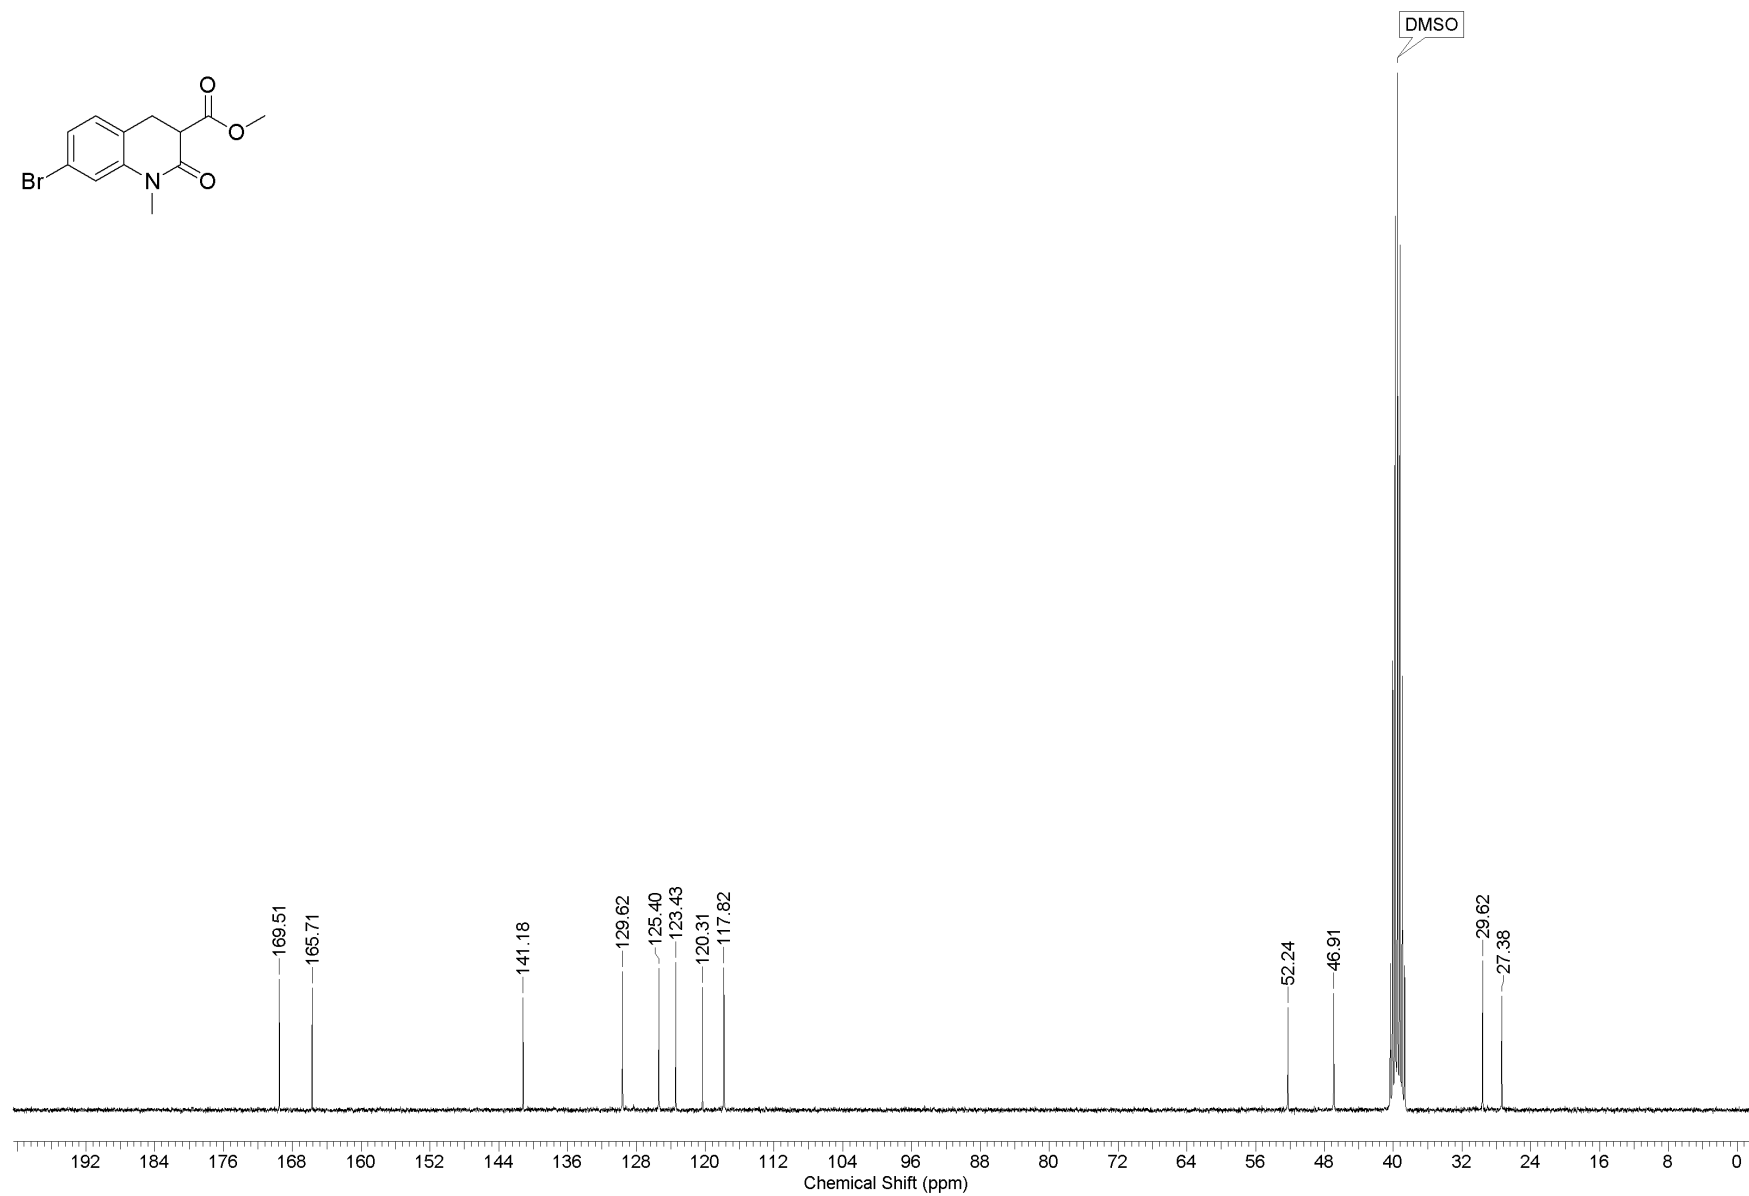



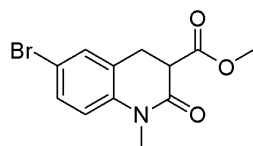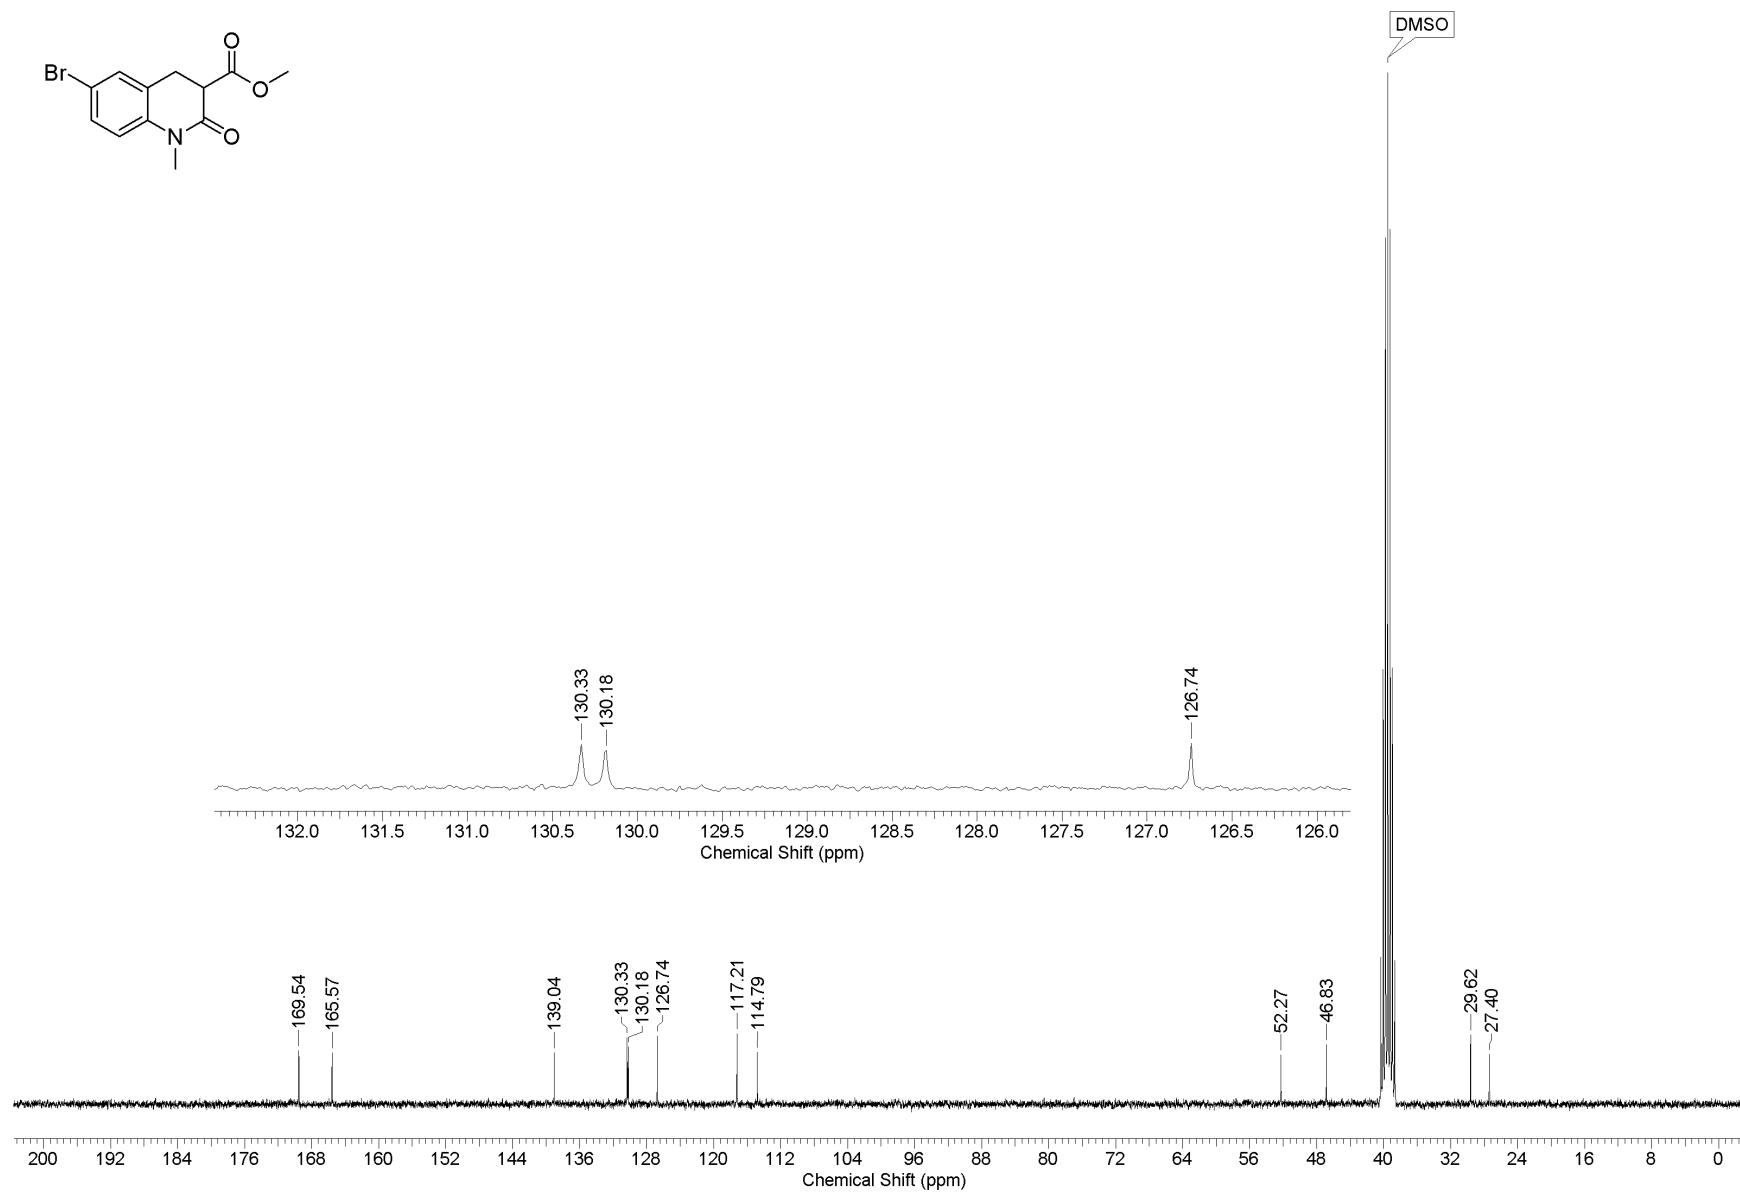

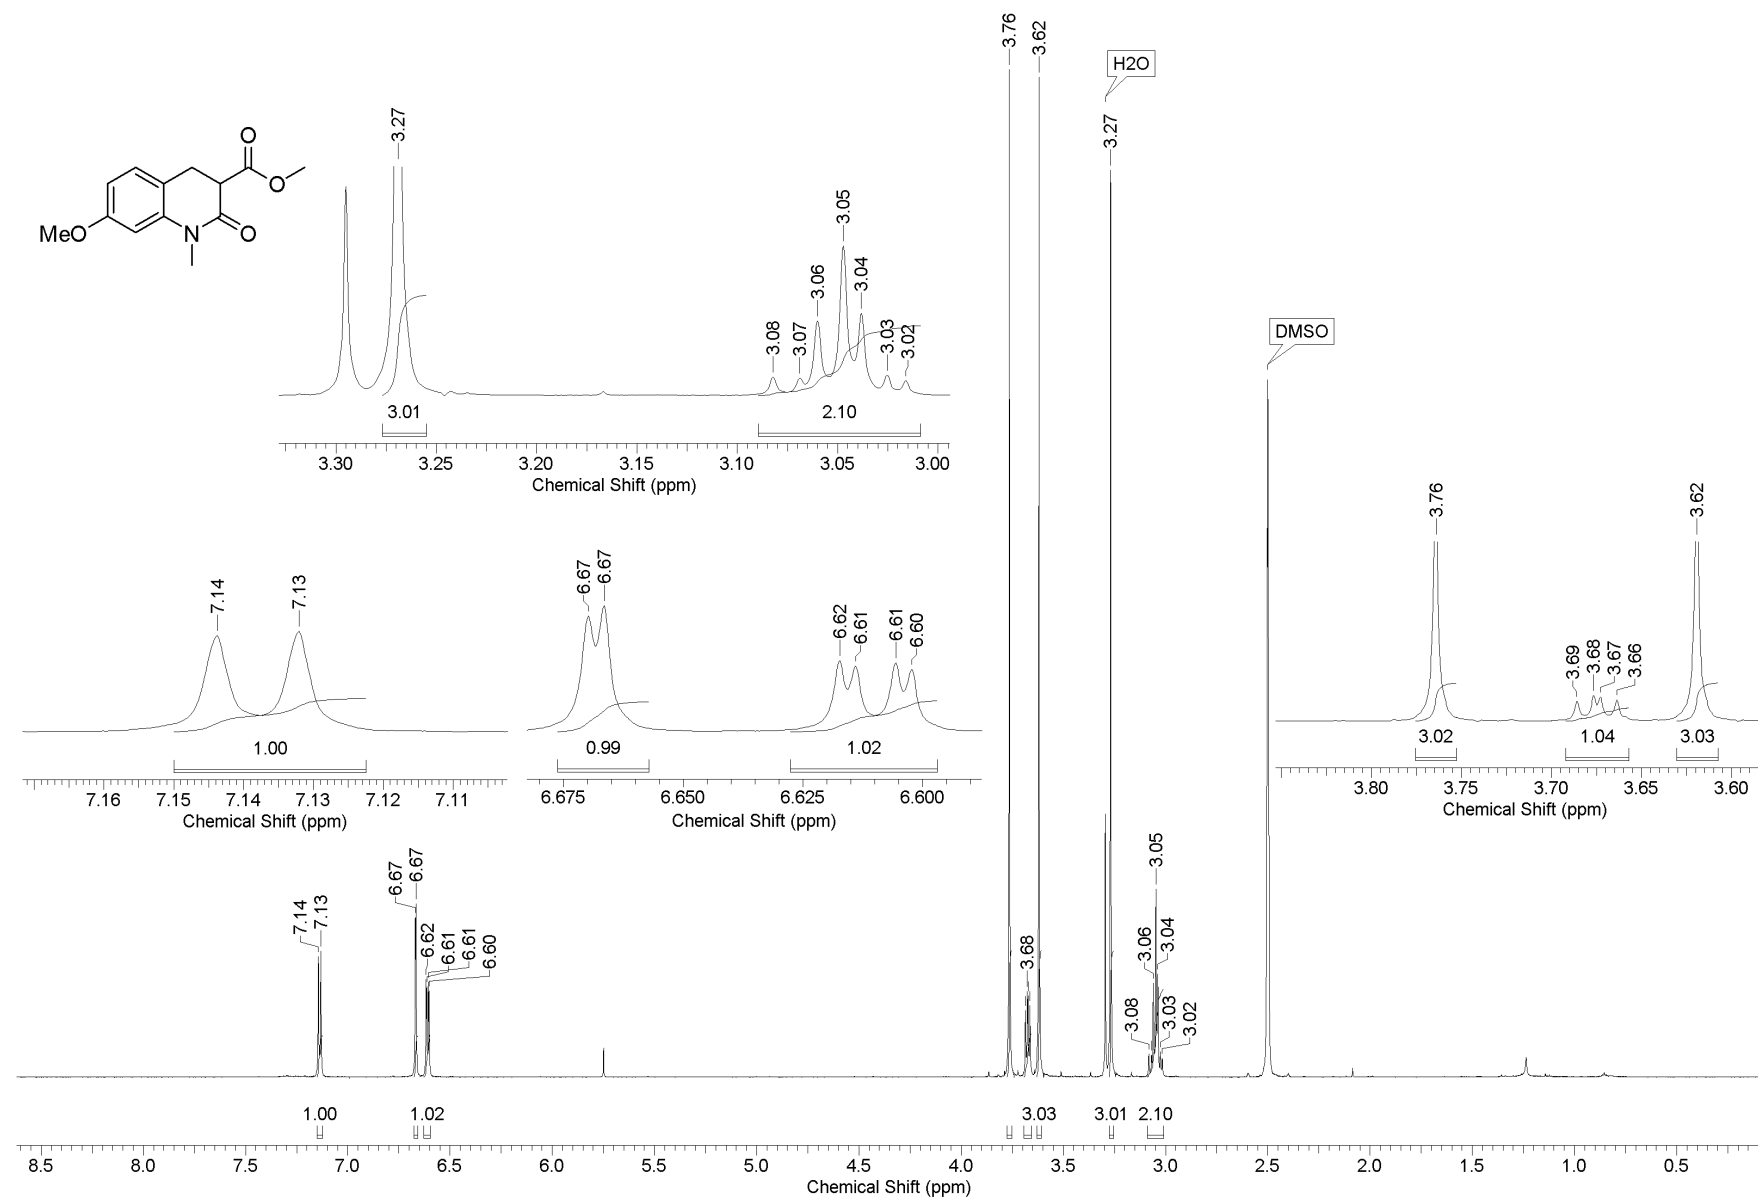

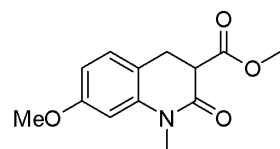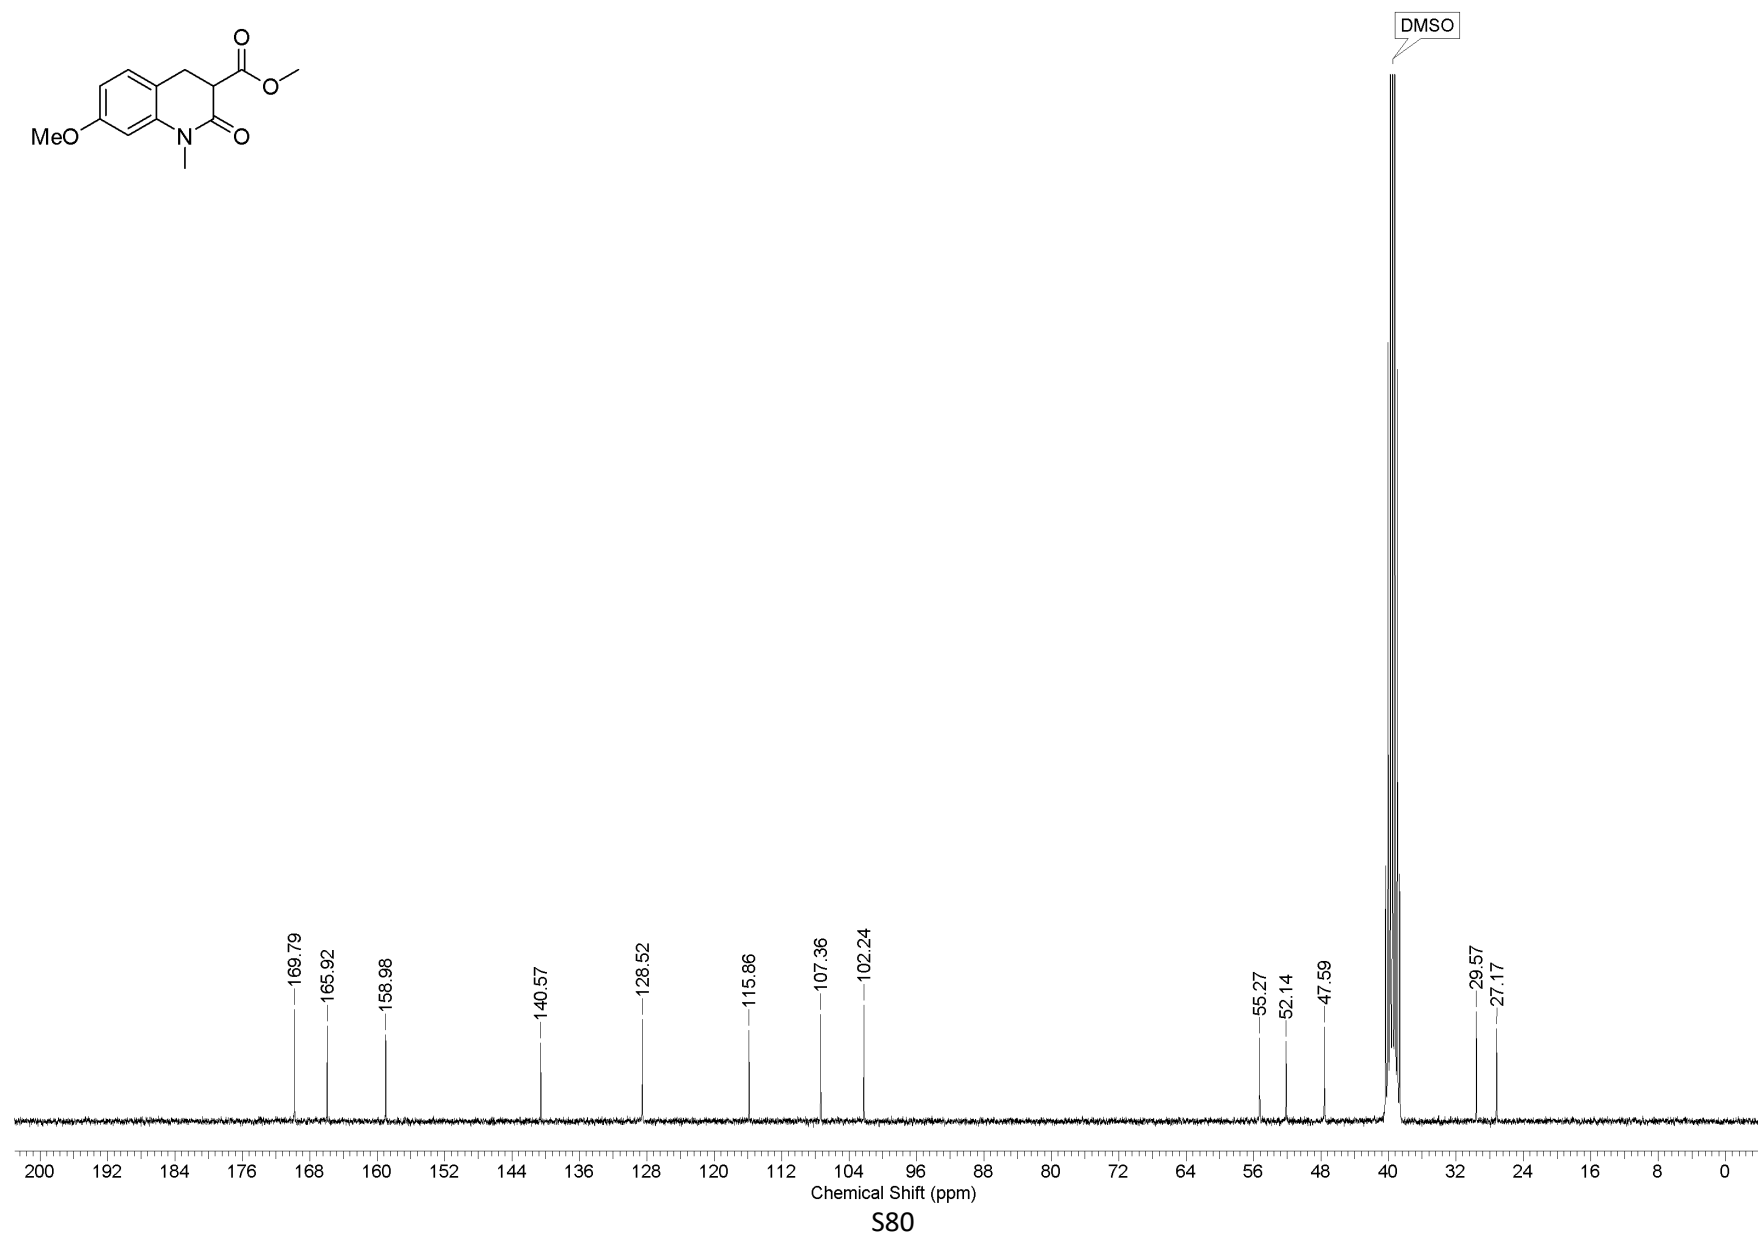

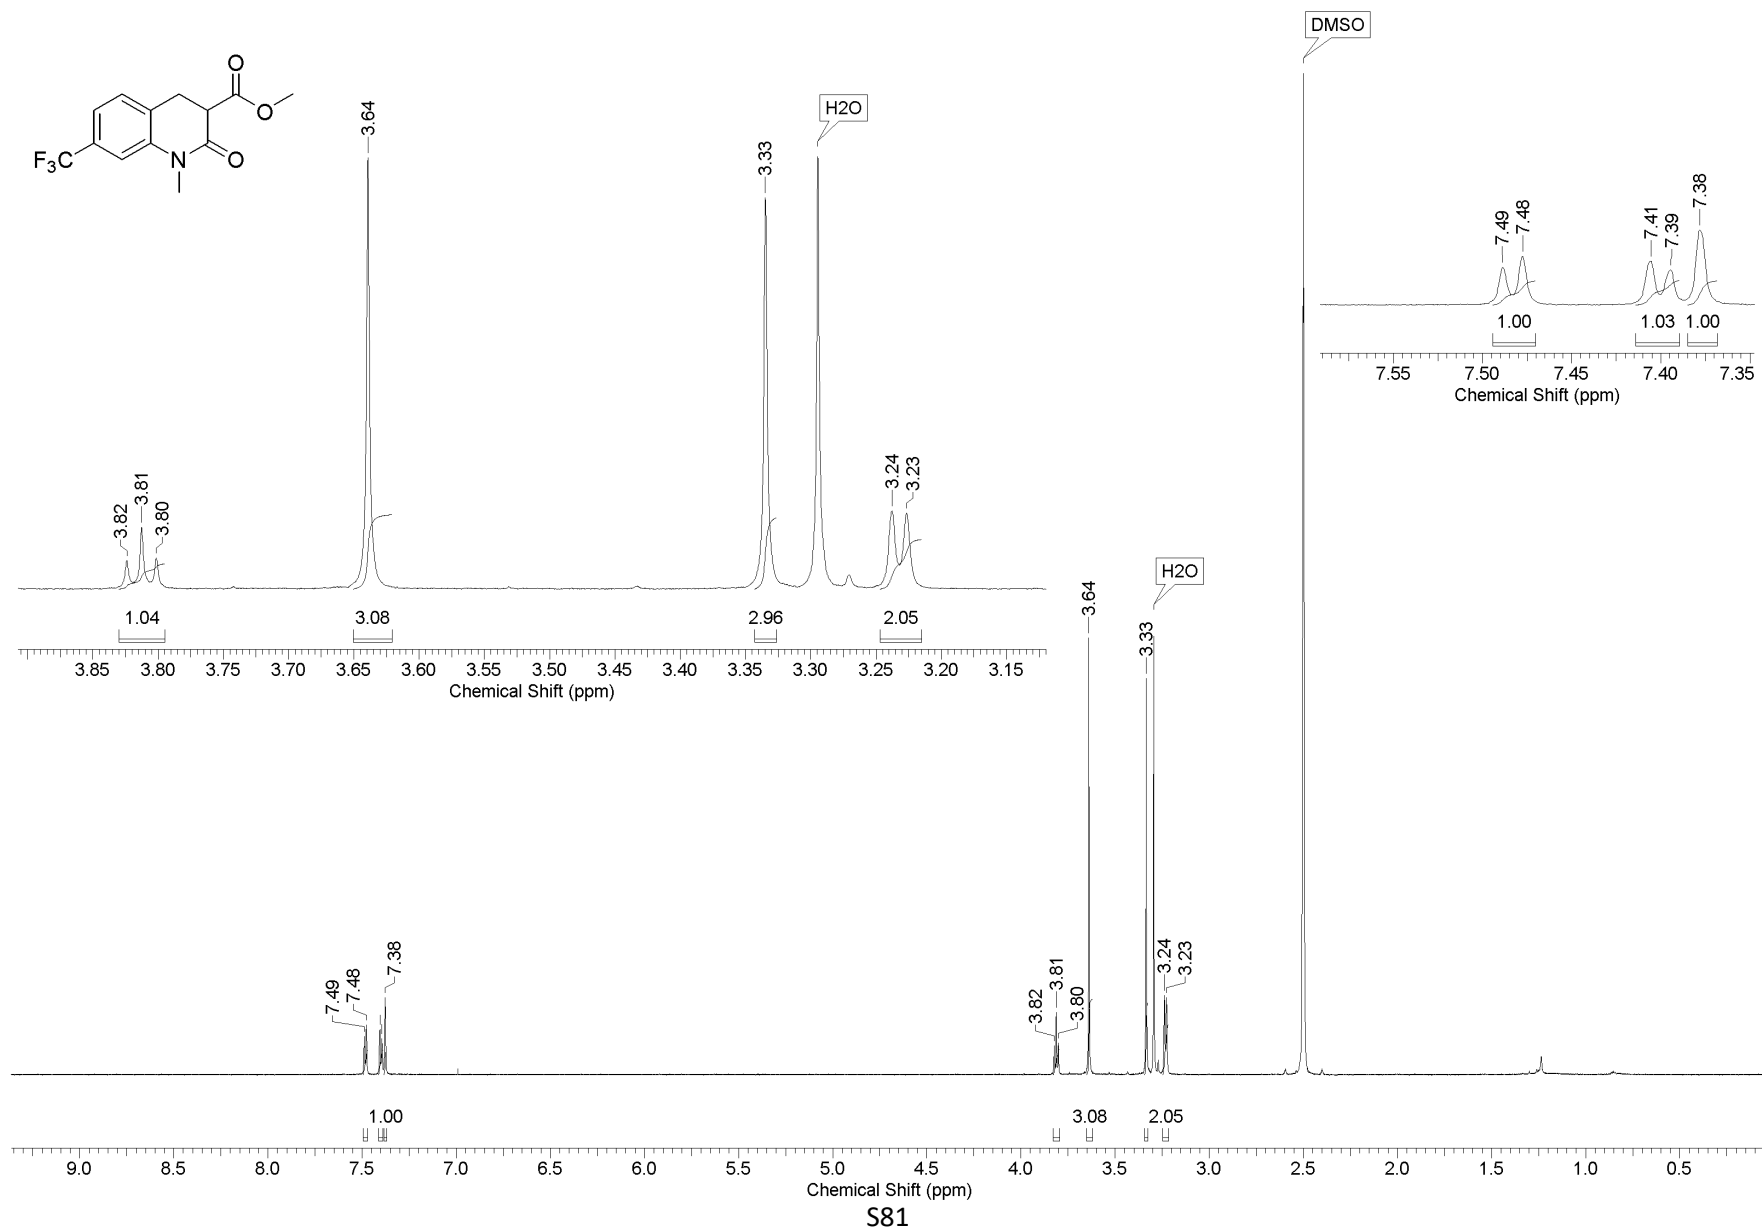

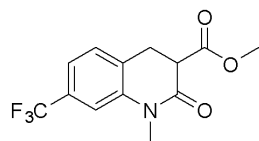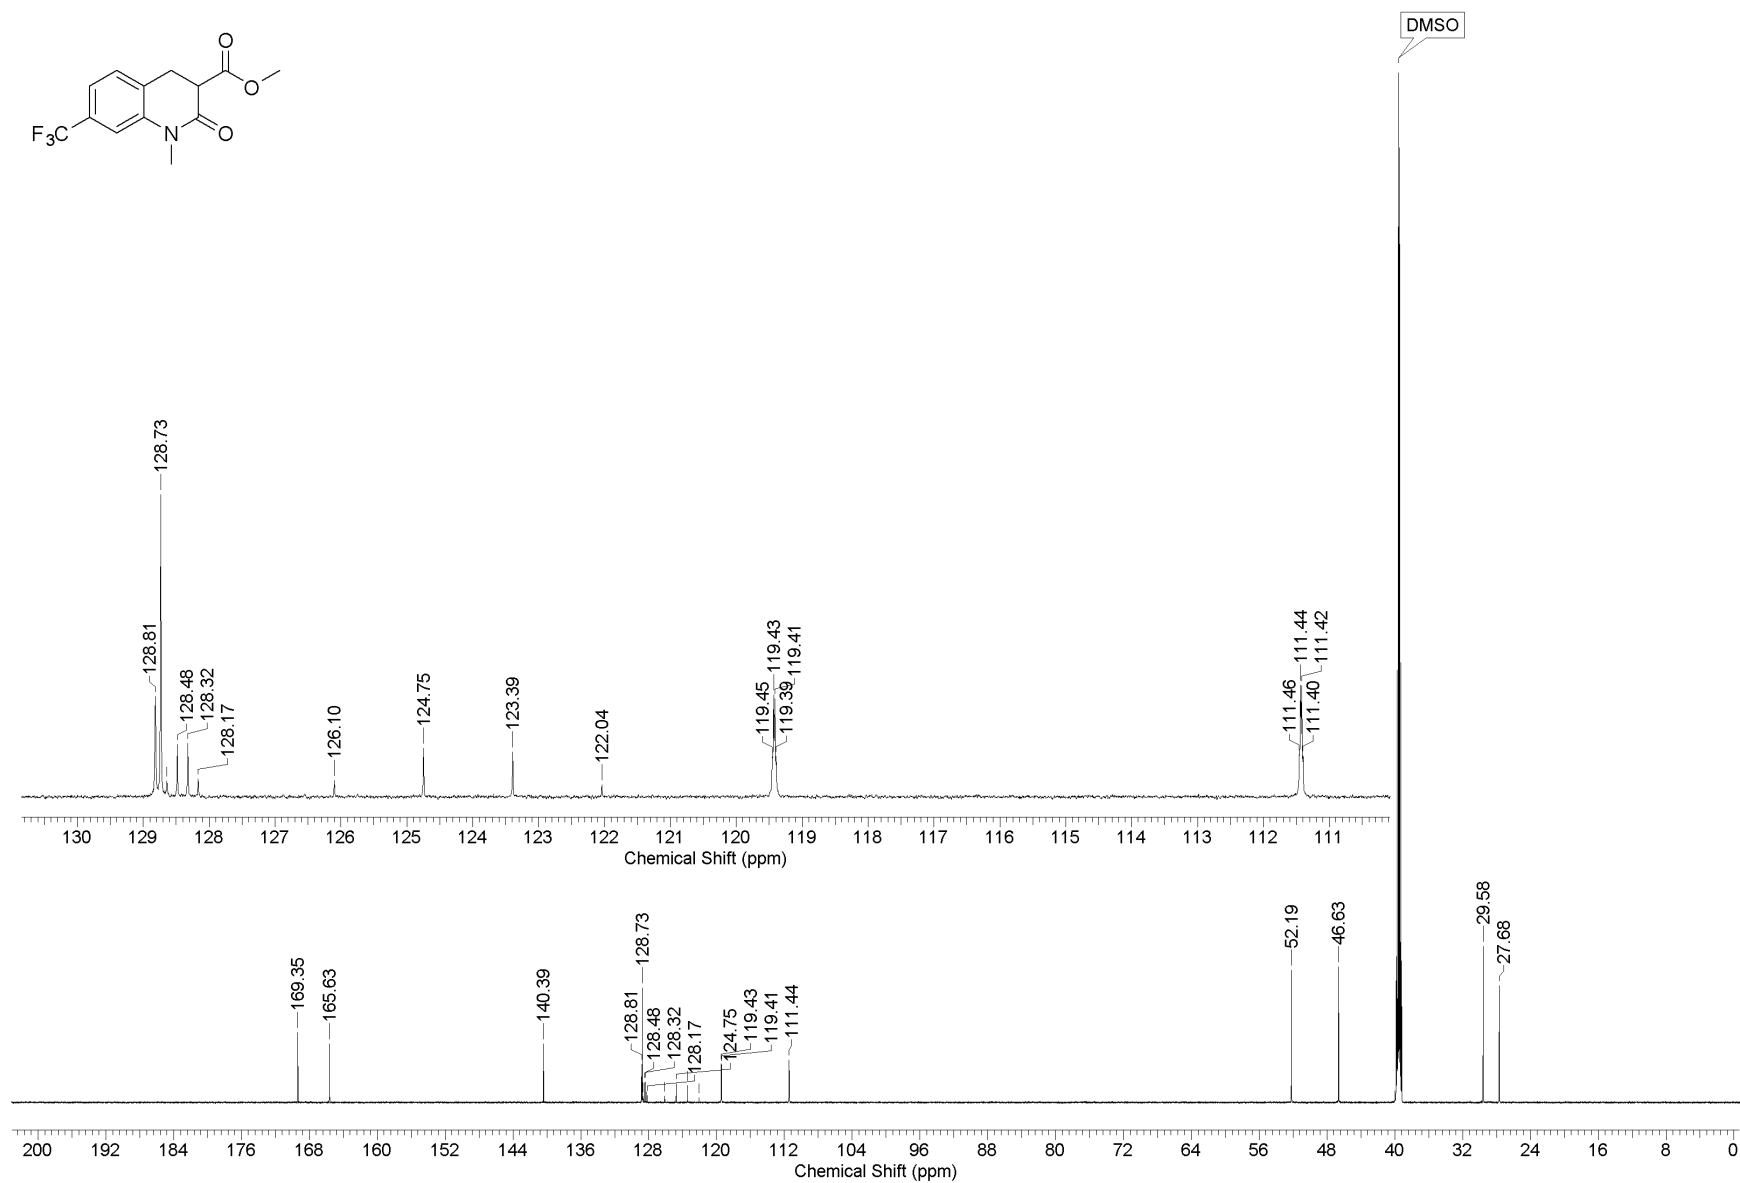

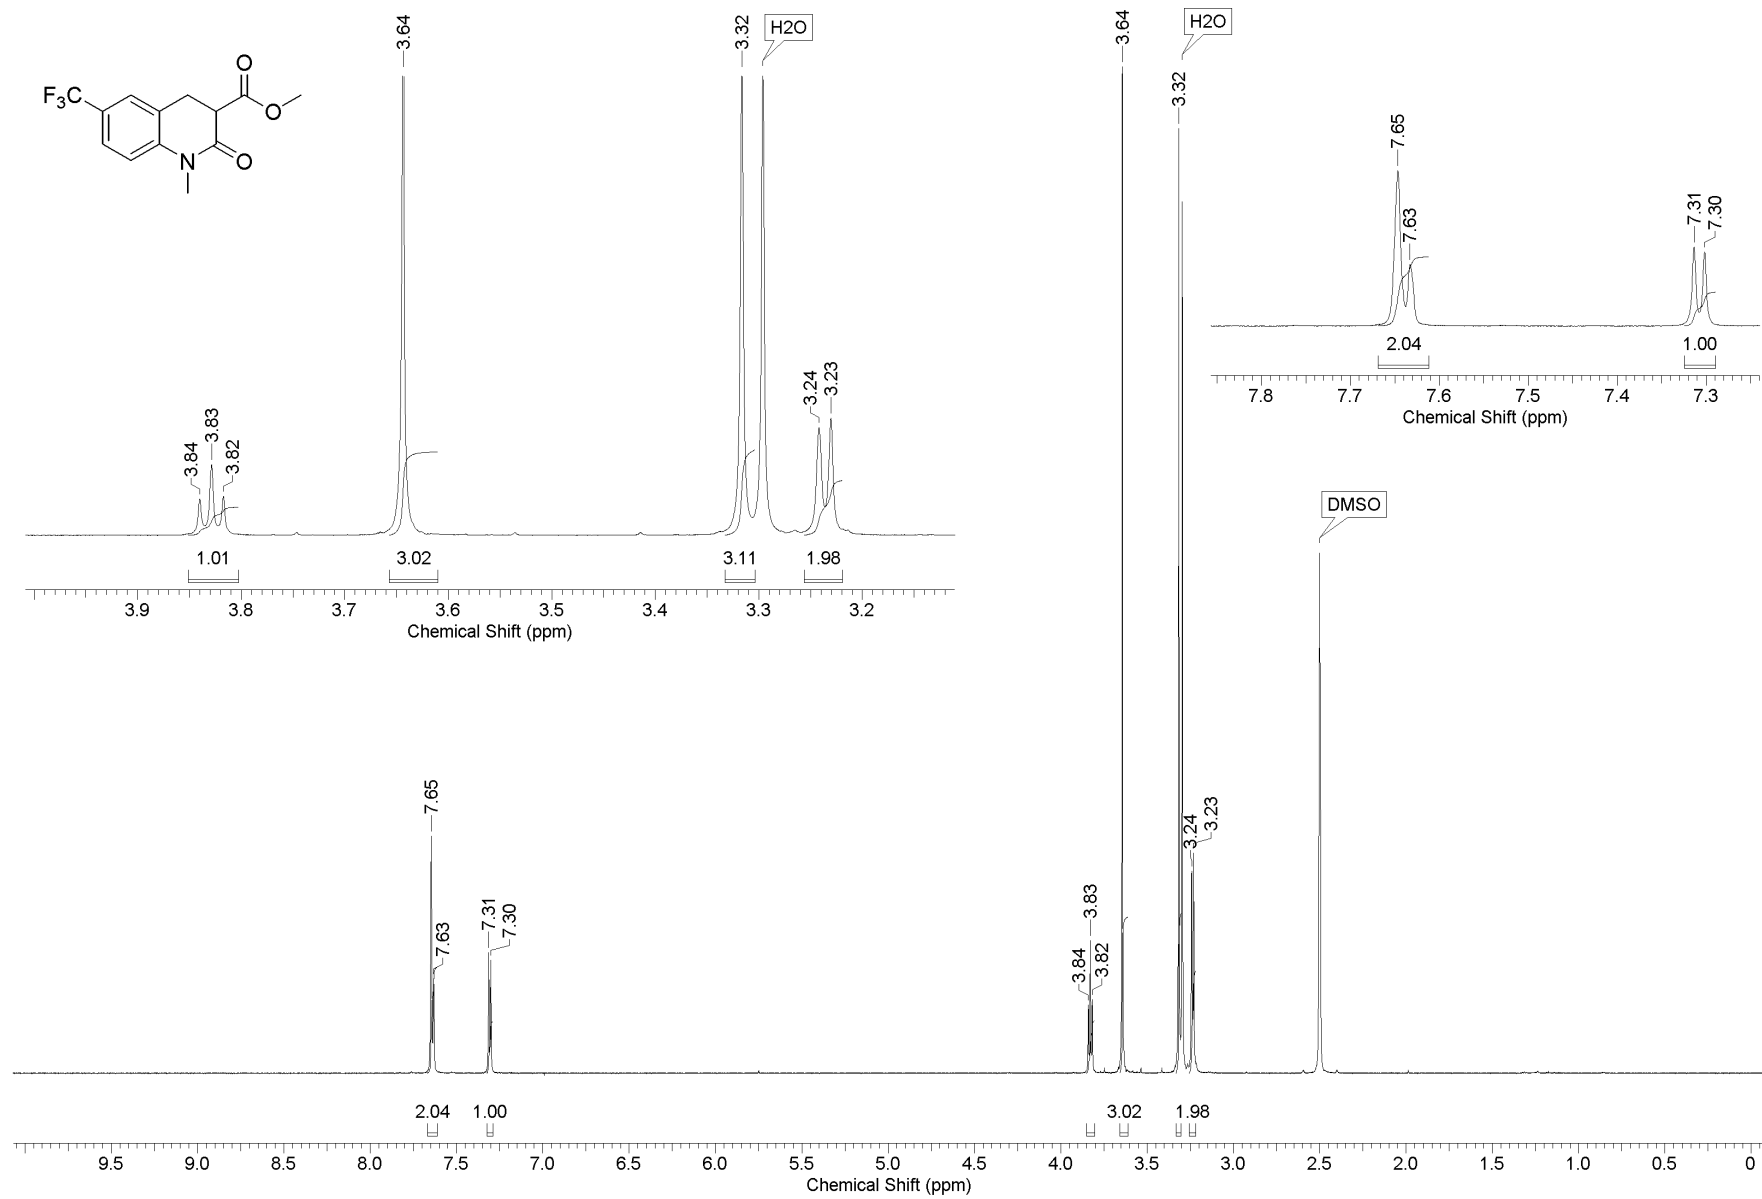

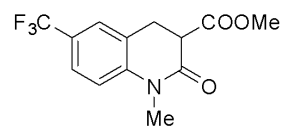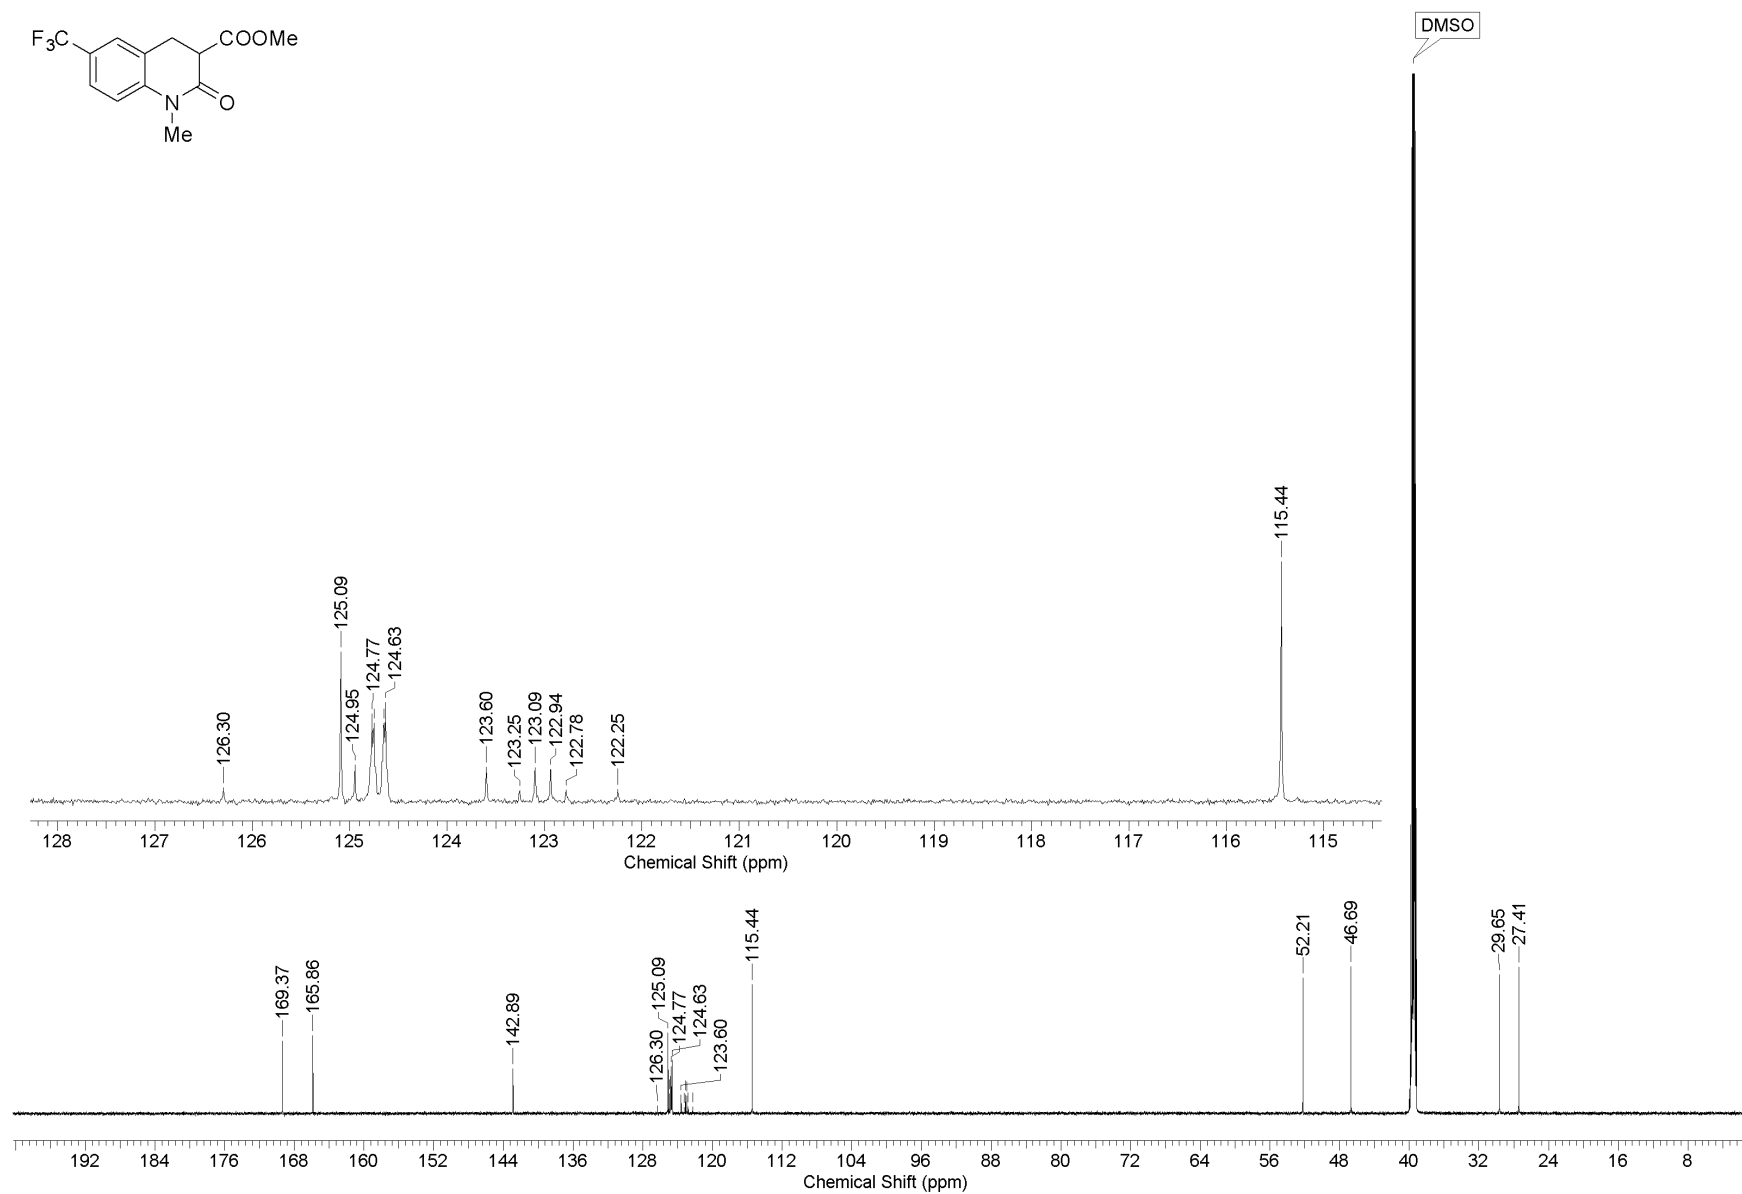

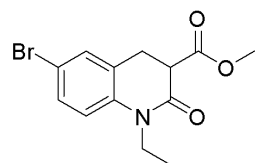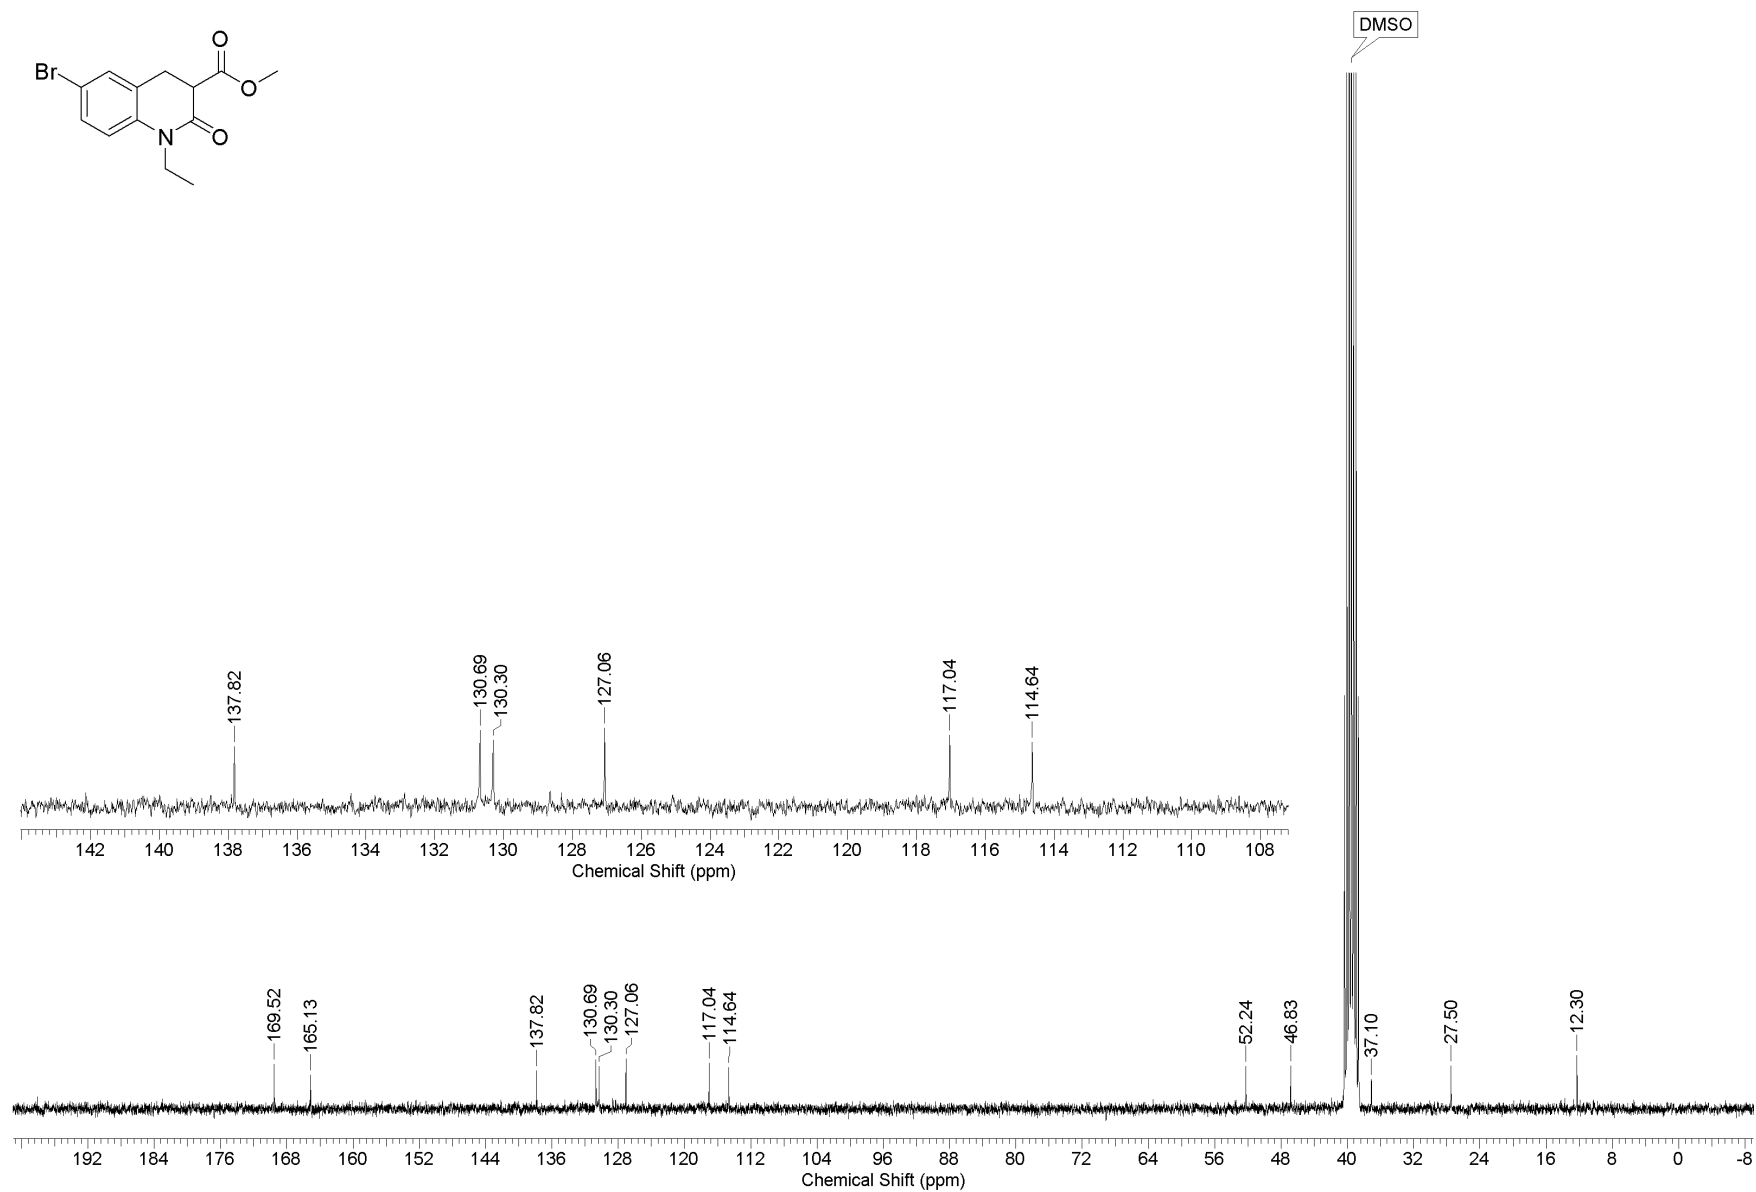

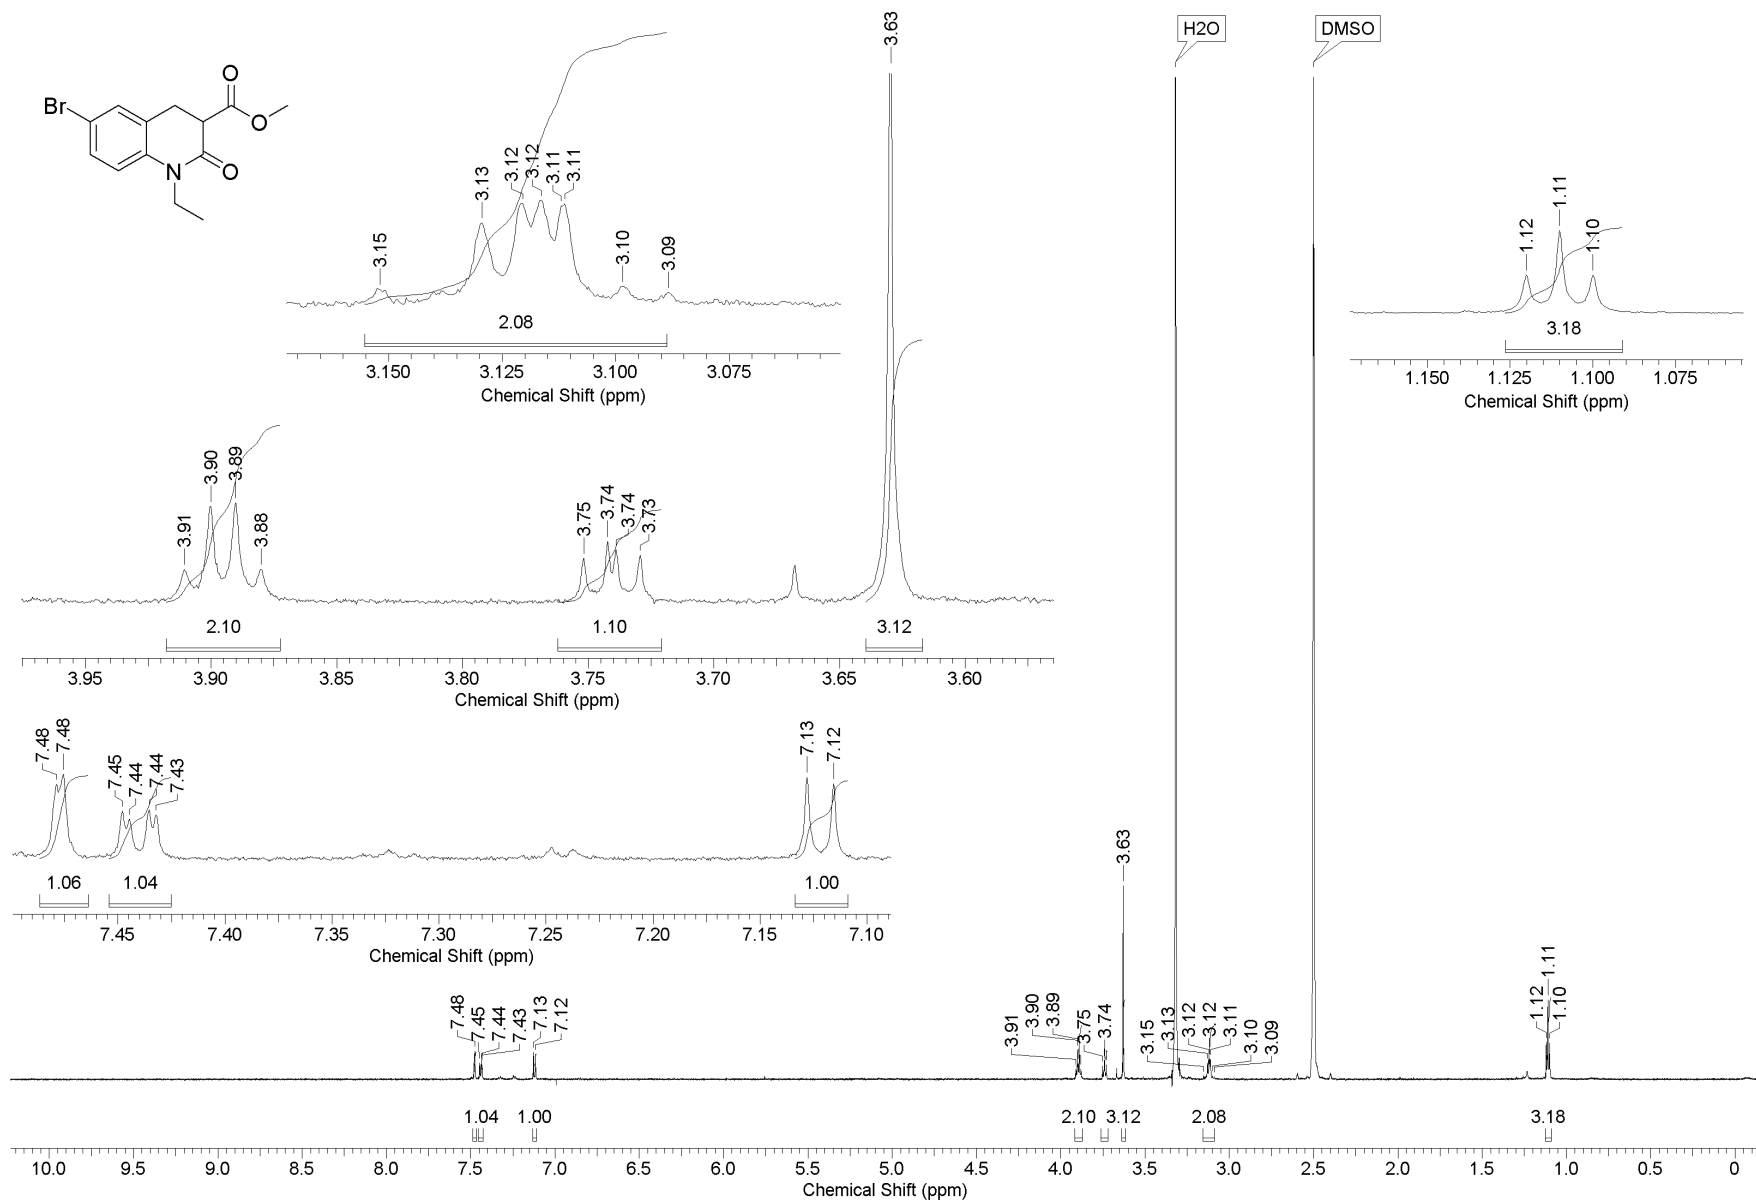

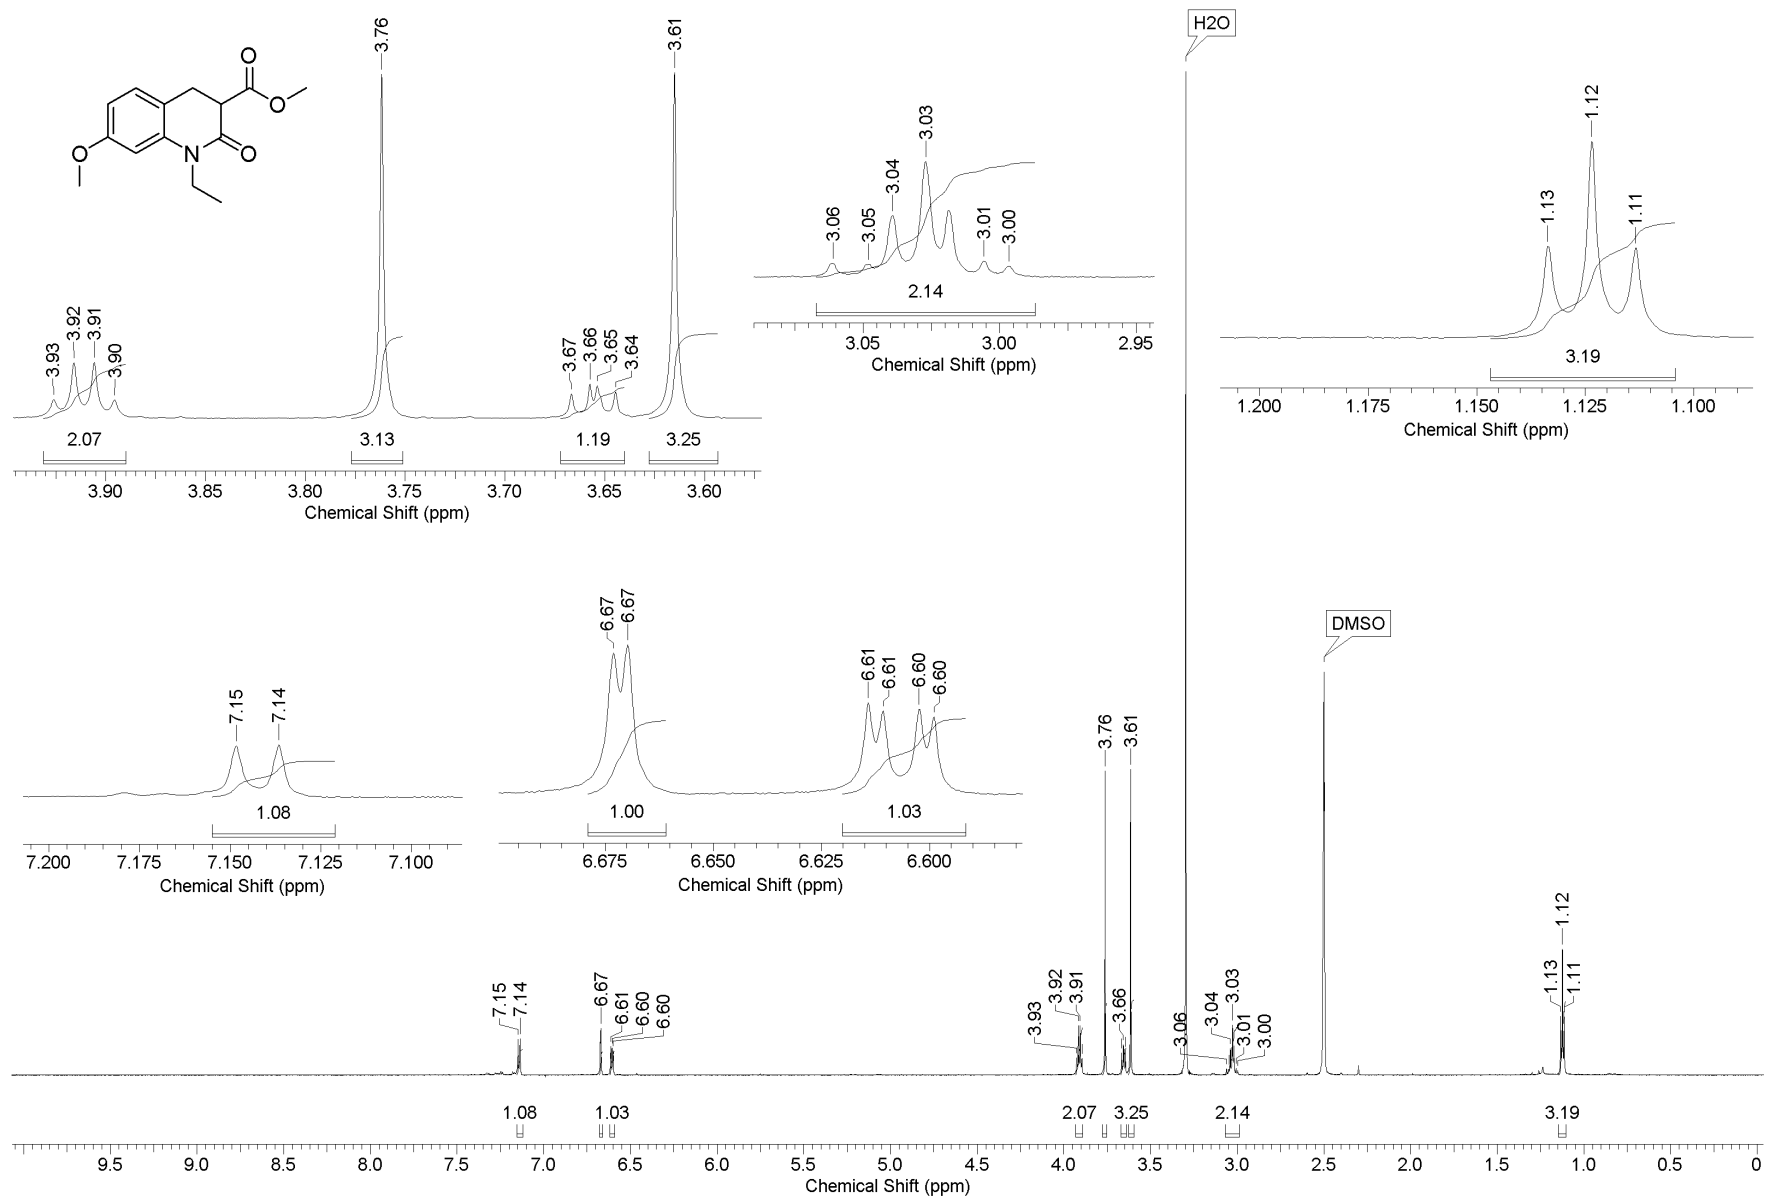

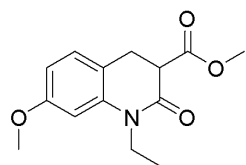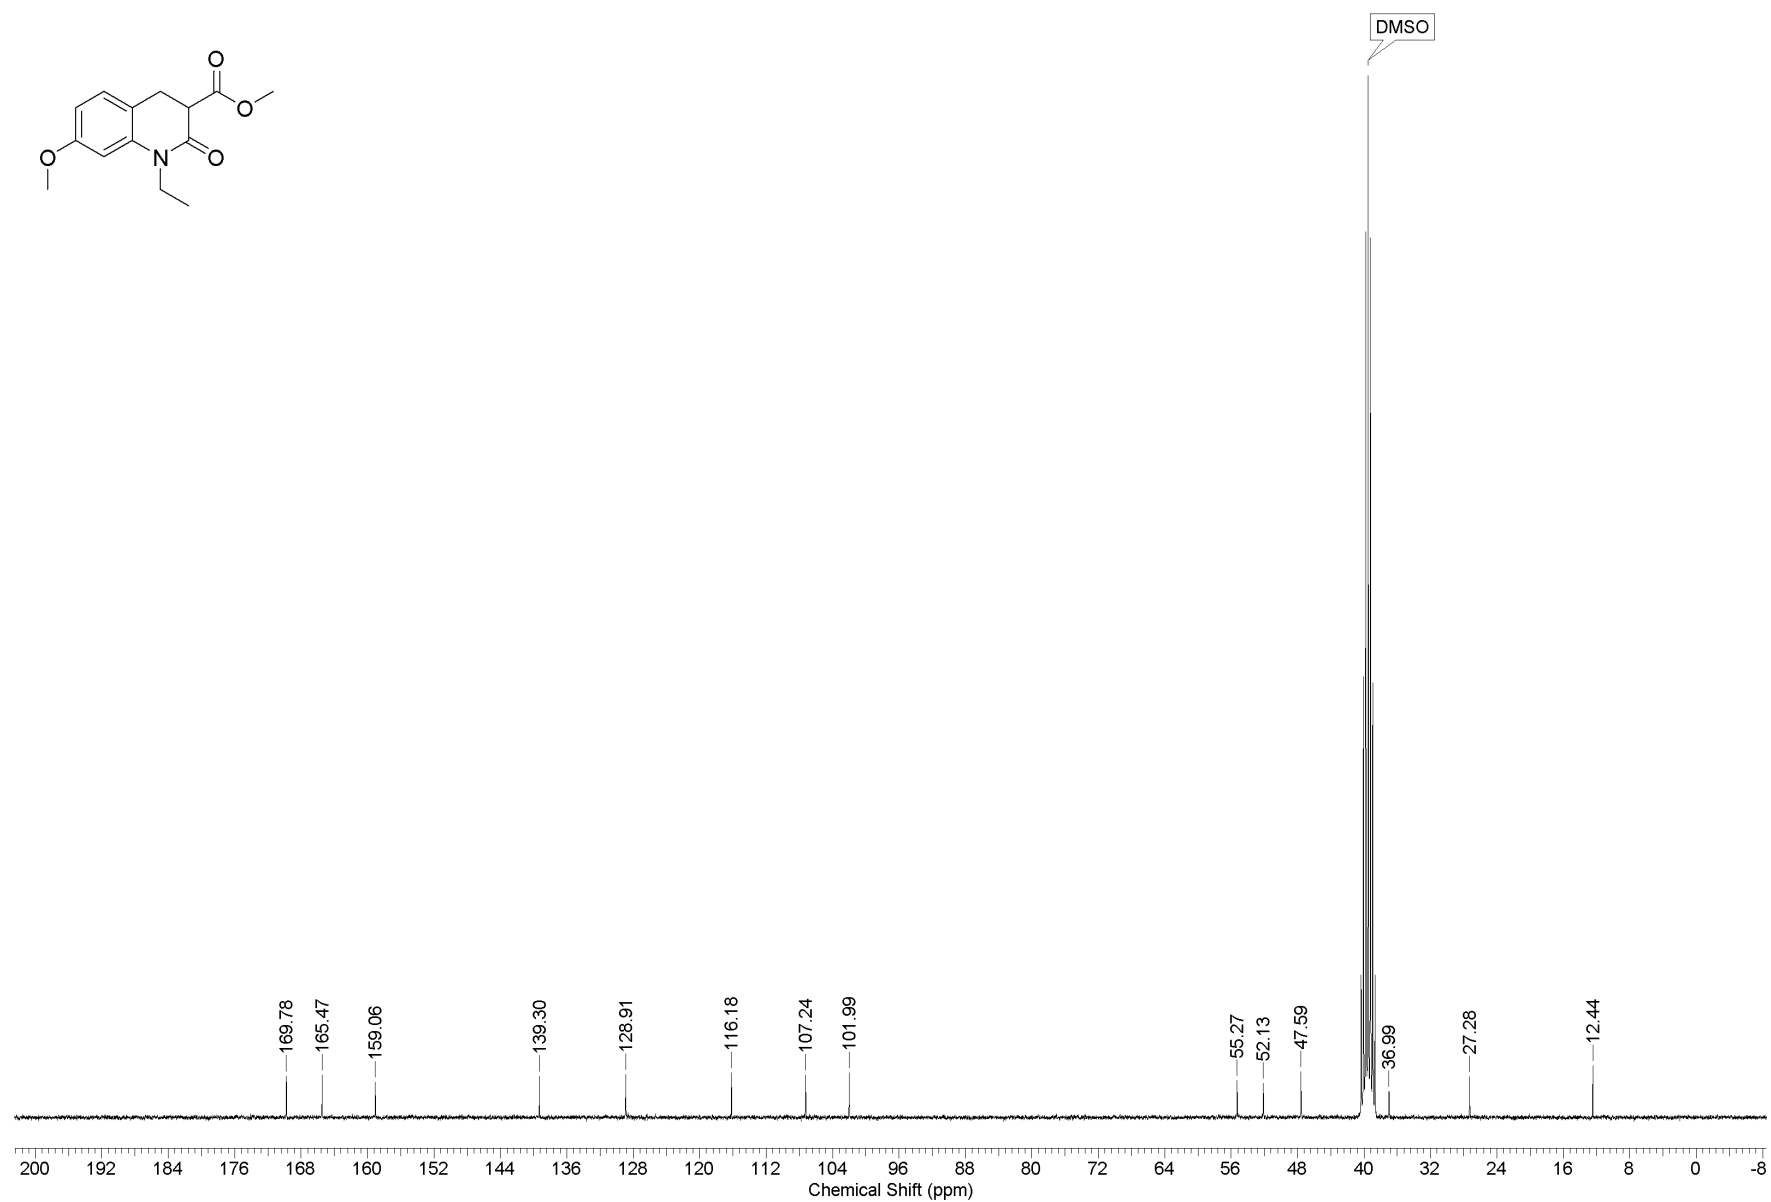

S88

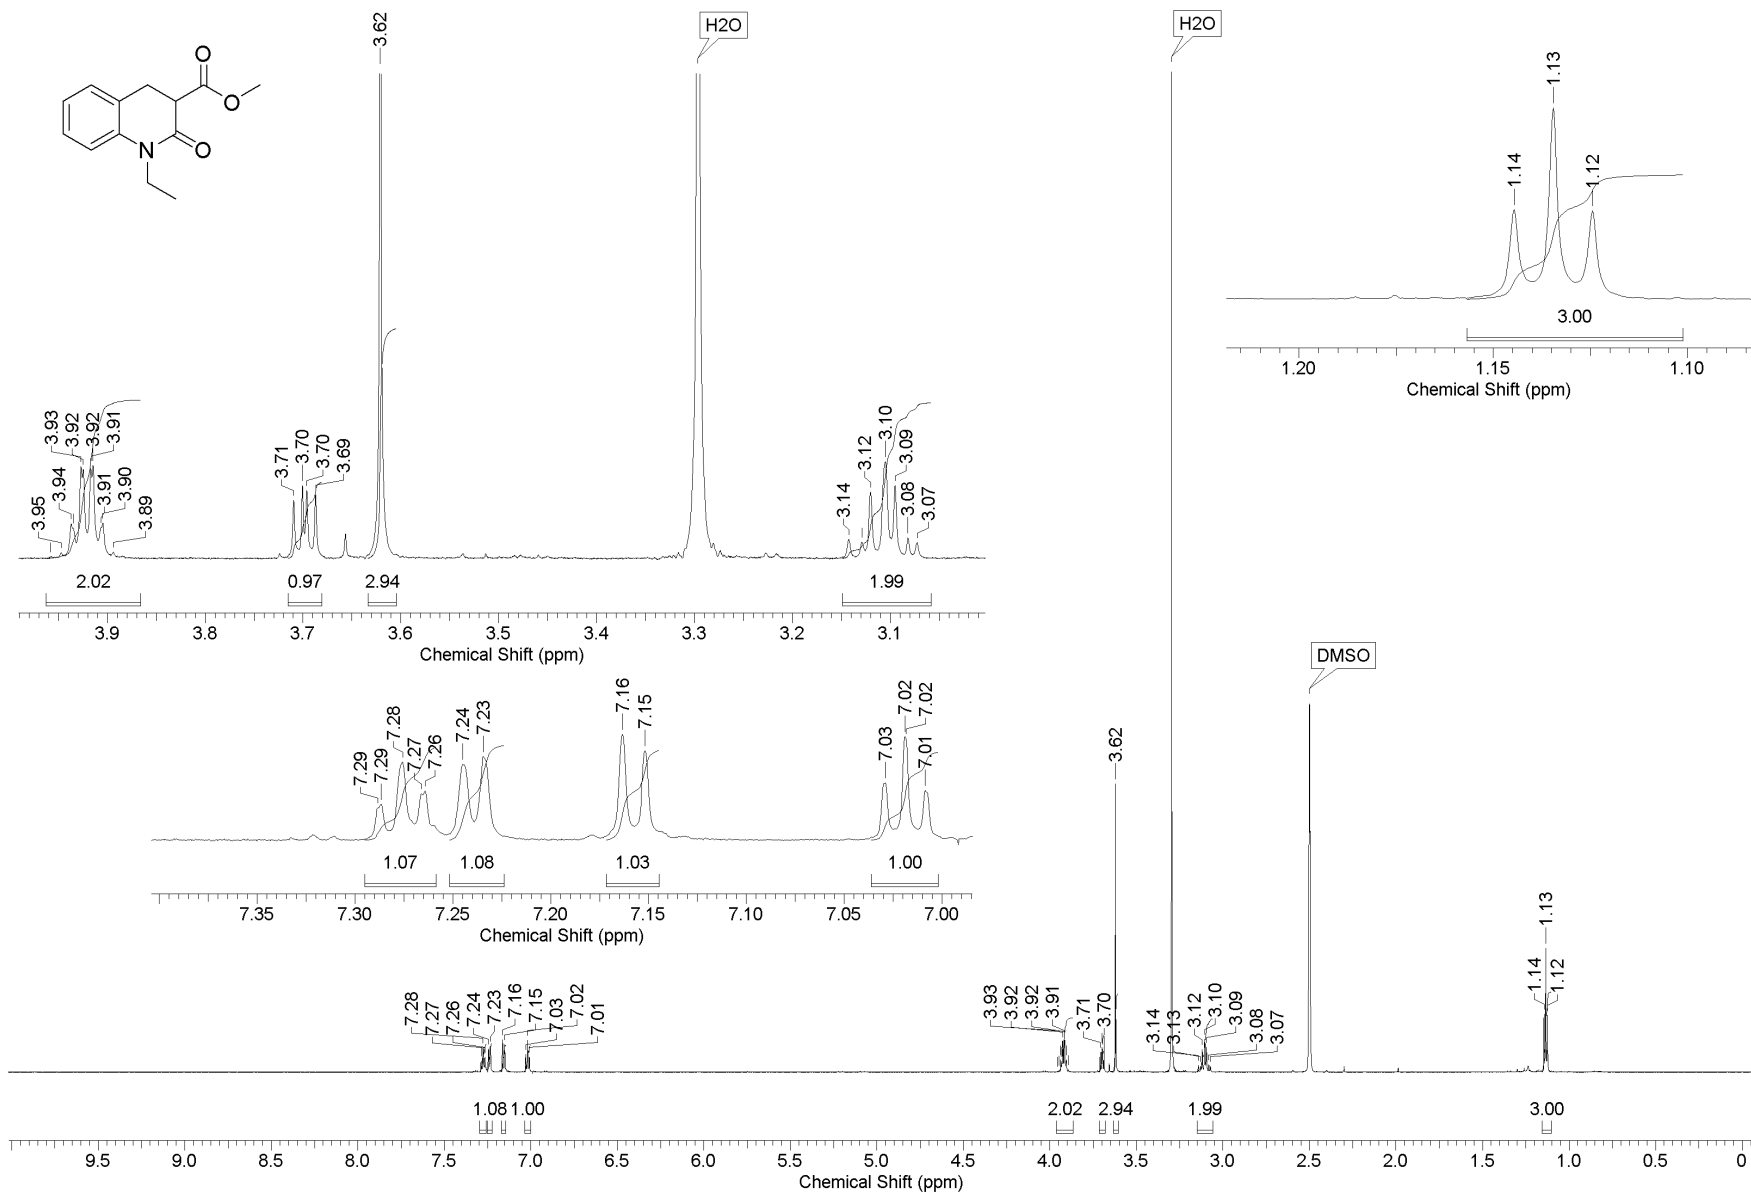

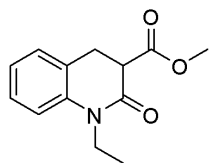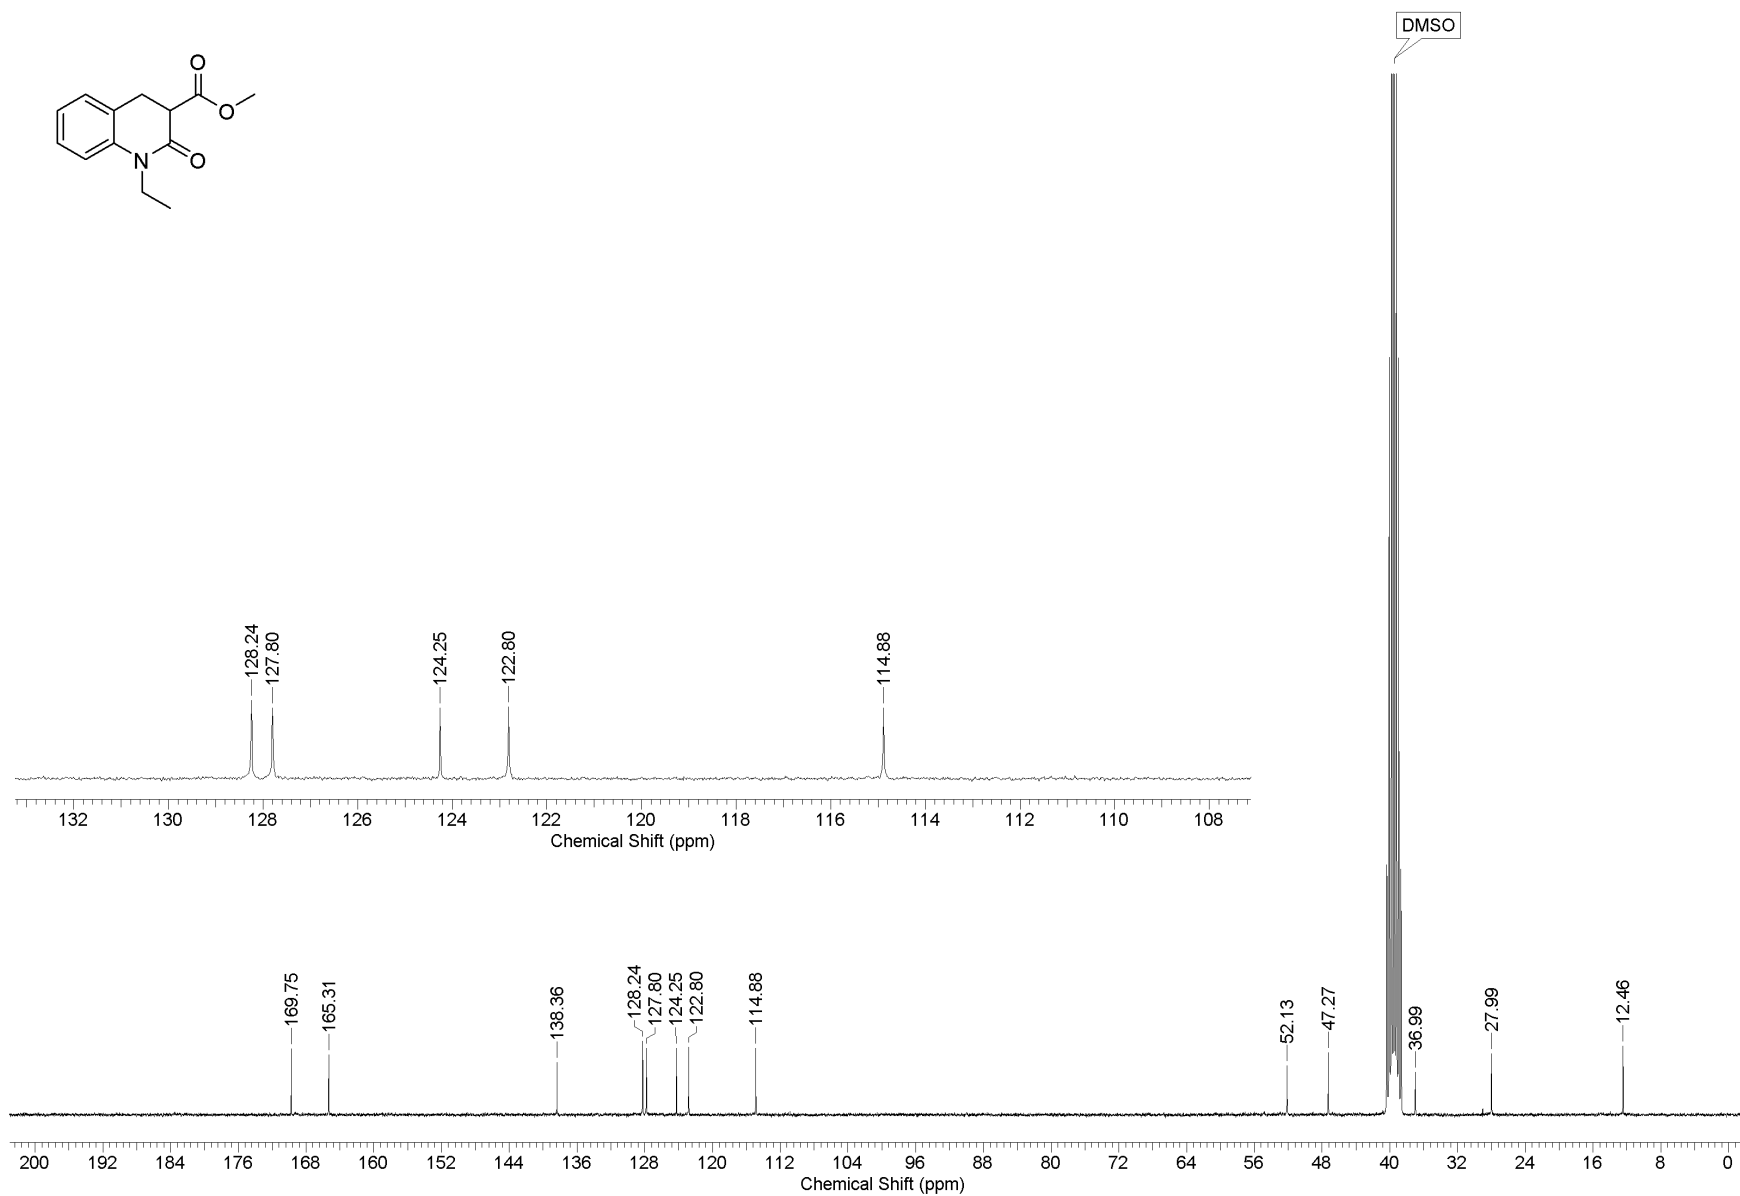

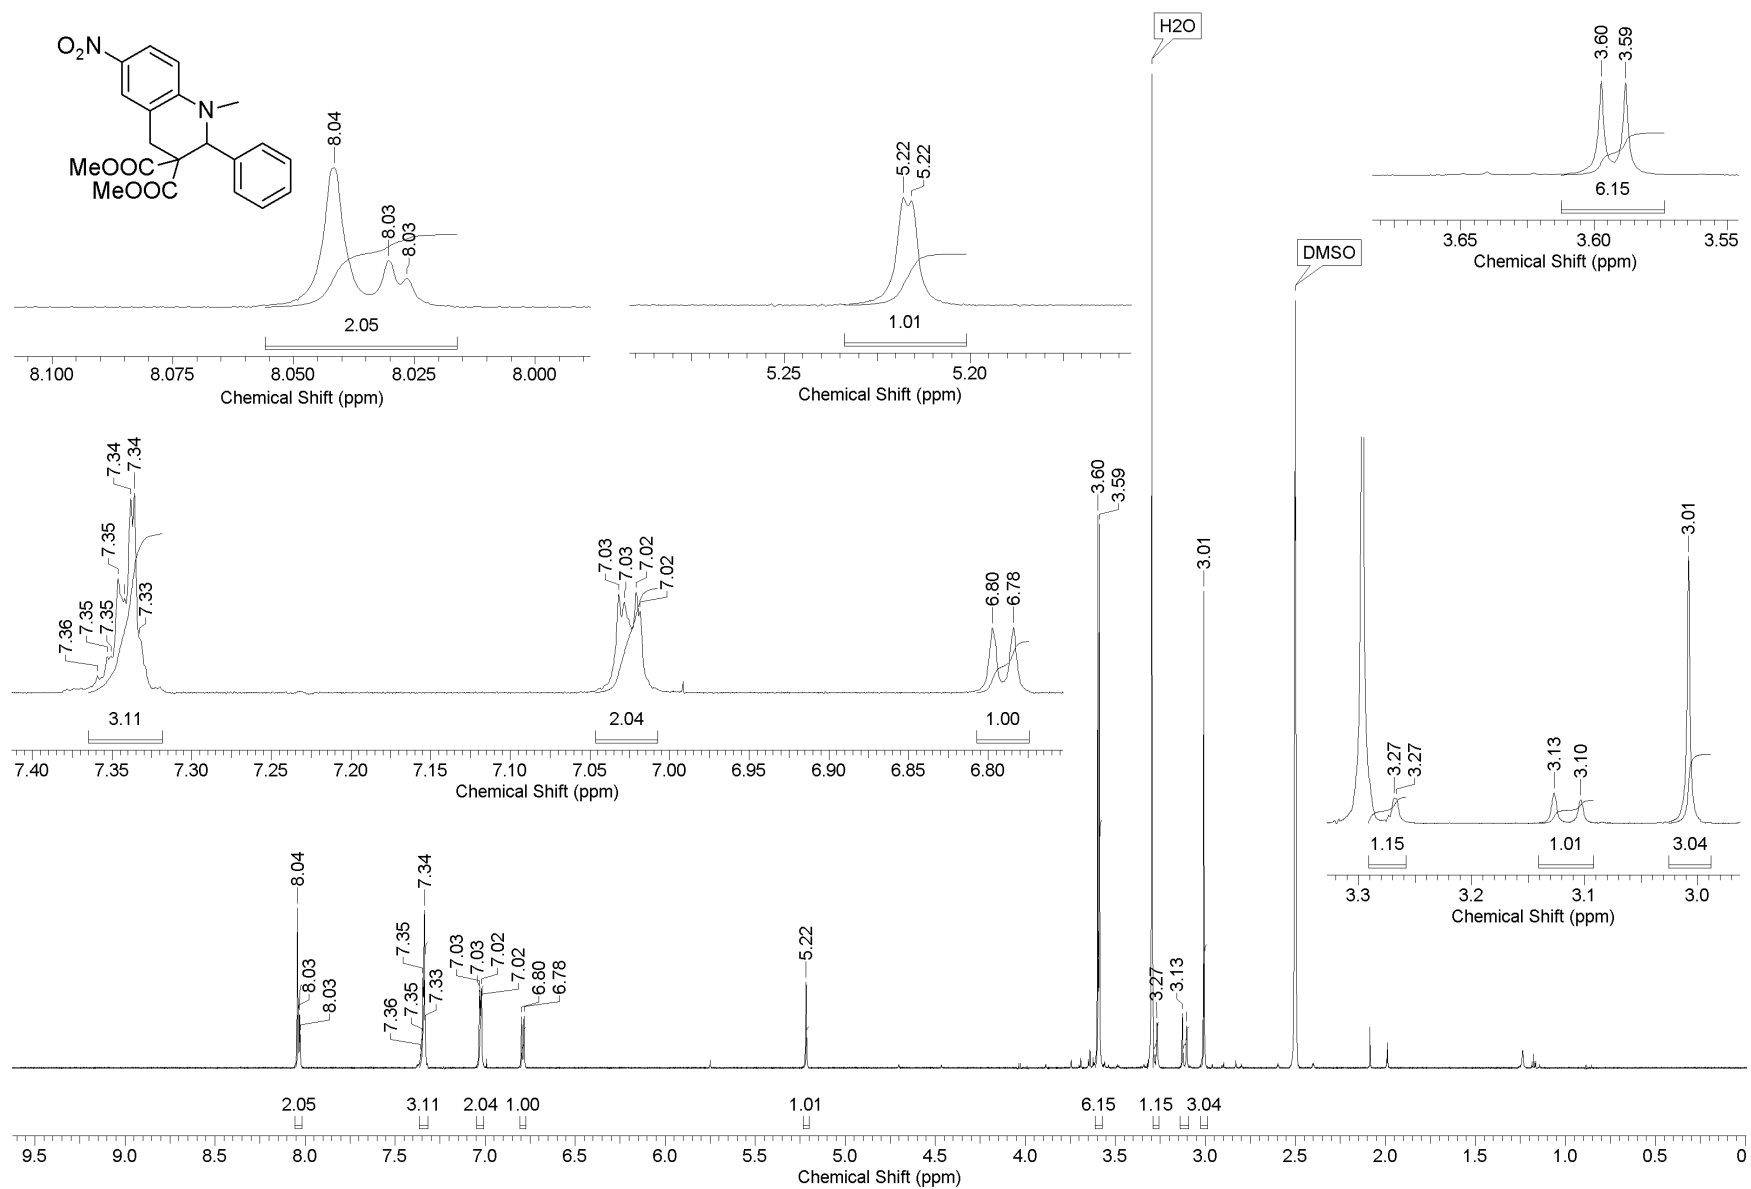

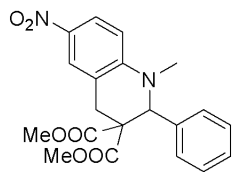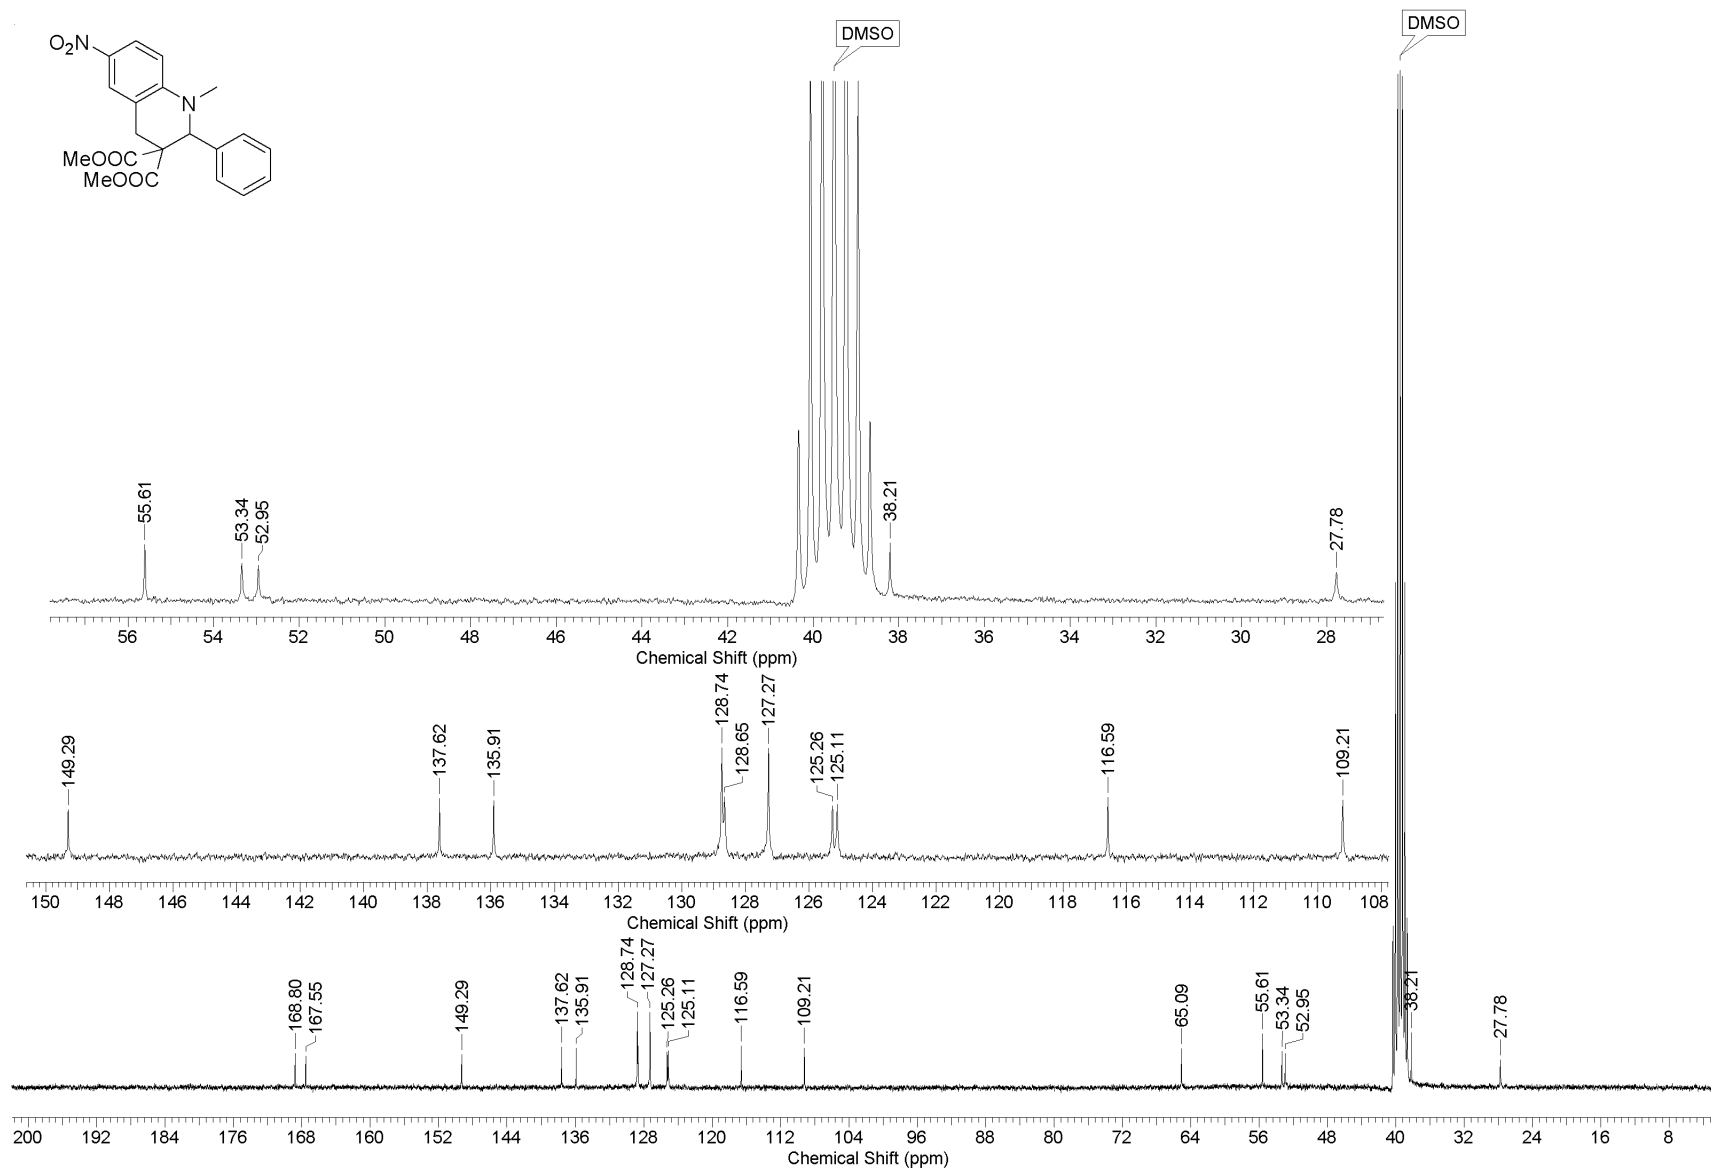

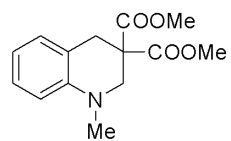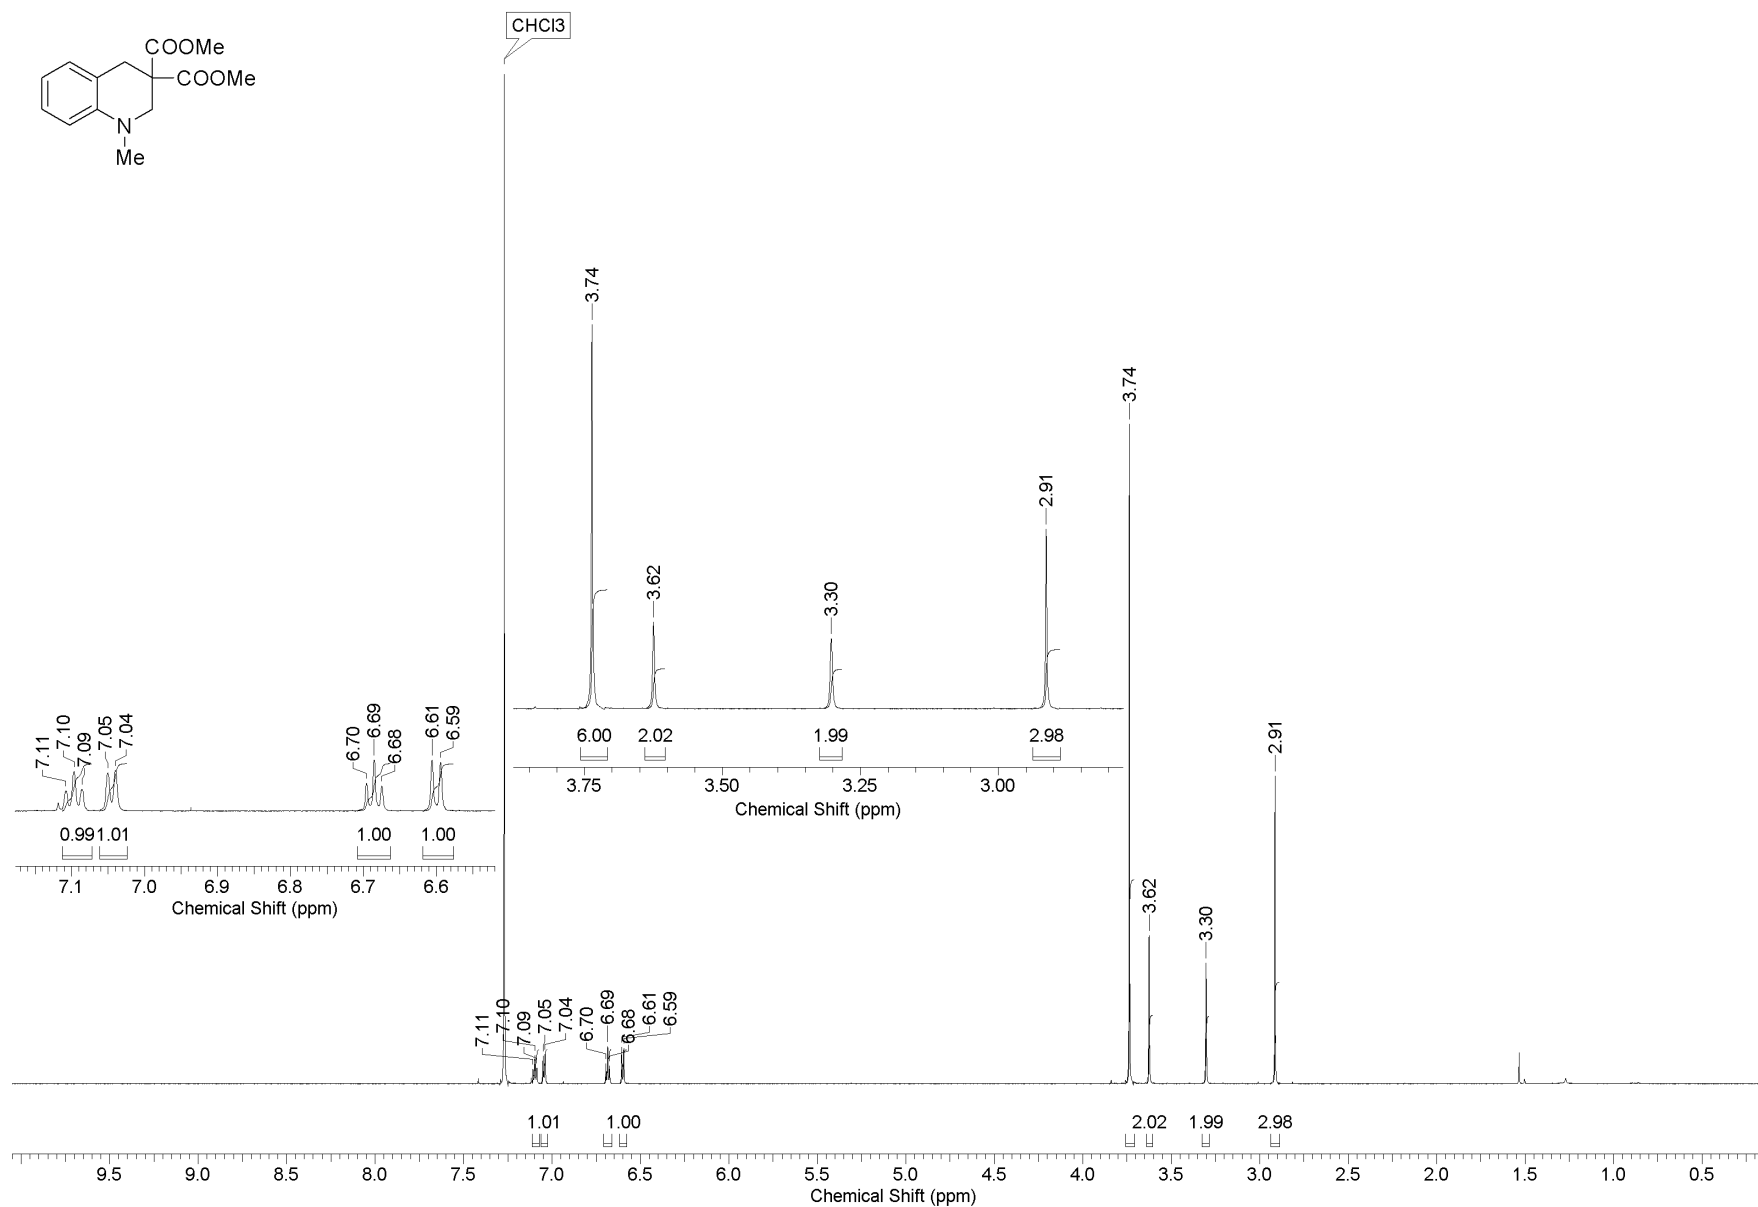

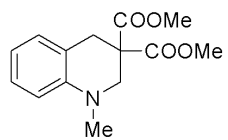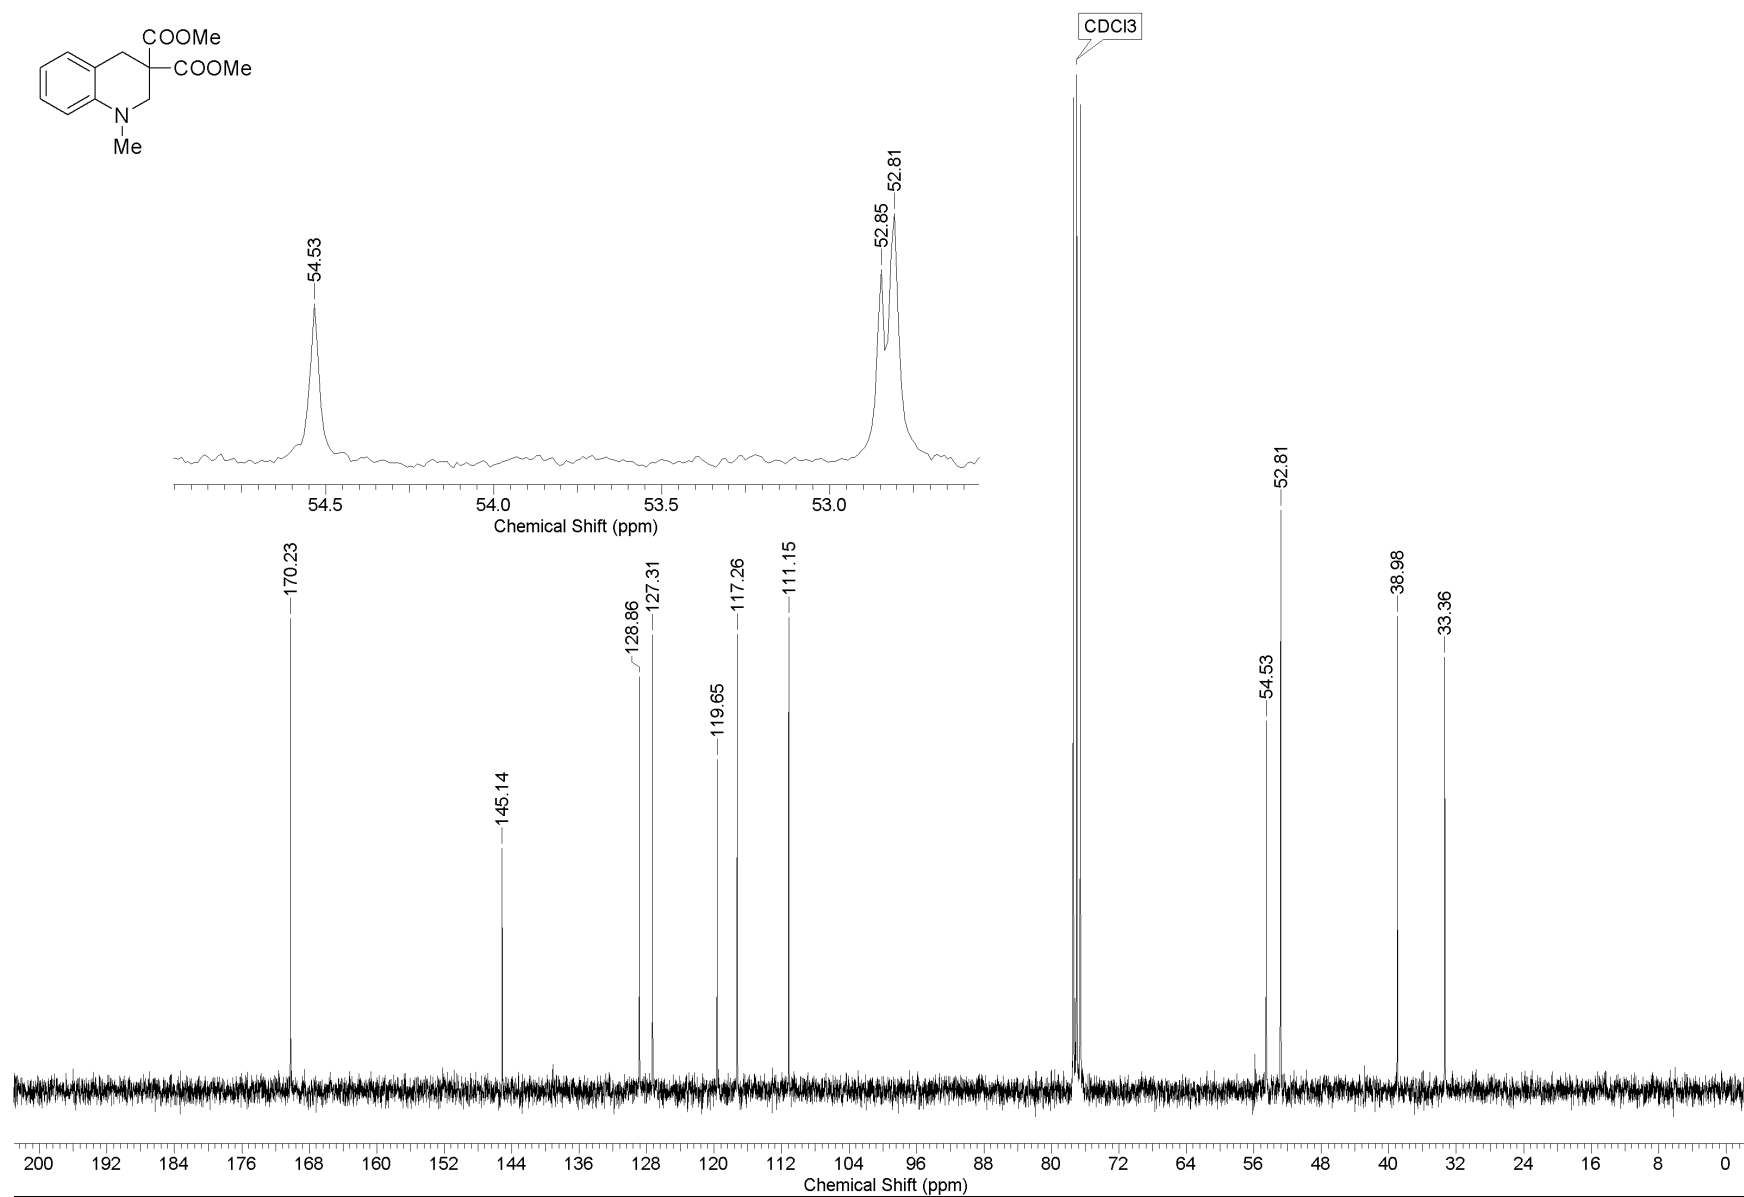

Supplement: s1 [file s1]
